# Supplementary material for: Rice (Oryza sativa L.) tau class glutathione S-transferase (OsGSTU30) overexpression in Arabidopsis thaliana modulates a regulatory network leading to heavy metal and drought stress tolerance
Source: Royal Society of Chemistry journal article supplement (doi:10.1039/c8mt00204e), 2018-11-21
Supplement: c8mt00204e2.pdf [file c8mt00204e2.pdf]

**Table S1.** (A) Primers used for cloning in plant expression vector (pBI121) and RT-PCR analysis.

| Primers    | Forward Sequence       | Reverse Sequence         |
|------------|------------------------|--------------------------|
| Os10g38600 | GTAGTGCAGGAAATGGCAGGAG | GAGTAAATTCAGTTGTTTGCGGCG |

(B) Primers used for cloning in protein expression vector (pET SUMO)

| Primers    | Forward Sequence      | Reverse Sequence        |
|------------|-----------------------|-------------------------|
| Os10g38600 | ATGGCAGGAGGAGGAGGAGCA | TCAGTTGTTTGCGGCGGTAGTGG |

(C) Primers used in the qRT-PCR gene expression studies to validate transcriptome analysis

| S.No. | Gene ID   | Gene description                                    | Function                                                                                               | Primers                                            |
|-------|-----------|-----------------------------------------------------|--------------------------------------------------------------------------------------------------------|----------------------------------------------------|
| 1     | AT1G33760 | ERF                                                 | RNA.regulation of transcription.AP2/EREBP, APETALA2/ethylene-responsive element binding protein family | F-GTTGTCCTACAGAGGCATTC<br>R-GGAAAACCTGTCGACGAGTTC  |
| 2     | AT4G31870 | glutathione peroxidase 7                            | protein.degradation                                                                                    | F-GACCAAGCACAGCTCCAATC<br>R-GCAACTTCTGGATGTCCTTC   |
| 3     | AT5G66400 | Dehydrin family protein                             | stress abiotic                                                                                         | F-CTACAGGTGGCCAAGGATACG<br>R-CATTCCTCCCAAGCCACCAC  |
| 4     | AT4G08040 | ACS11 1-aminocyclopropane-1-carboxylate synthase 11 | hormone metabolism.ethylene. synthesis-degradation.1-aminocyclopropane-1-carboxylate synthase          | F-GGACAGGAGTAGAGATTGTTCC<br>R-GTGGTAGAGGTTCCAAGTGG |
| 5     | AT5G22920 | CHY-type/CTCH Y-type/RING-type Zinc finger          | protein.degradation.u biquitin.E3.RING                                                                 | F-GACGATGCAAGATTAGAGCAC<br>R-GTTCTGTCTCACAAAGCGAGC |

|    |           |                                          |                                                                                                          |                                                     |
|----|-----------|------------------------------------------|----------------------------------------------------------------------------------------------------------|-----------------------------------------------------|
|    |           | protein                                  |                                                                                                          |                                                     |
| 6  | AT4G17490 | ERF6                                     | RNA.regulation of transcription.AP2/ER EBP, APETALA2/ethylene -responsive element binding protein family | F-CGAACGATTCCCTTCACGTTCC<br>R-CCTCTGTAATGCCTCTTCTCC |
| 7  | AT4G21440 | MYB-like 102                             | RNA.regulation of transcription.MYB domain transcription factor family                                   | F-CGATCTCCTCGATATCTCATCC<br>R-CGAGTCATGATCCACCACAAG |
| 8  | AT3G01270 | Pectate lyase family protein             | cell wall.degradation.pectate lyases and polygalacturonases                                              | F-CGATAAATGCTGGCGTTGC<br>R-GTGACGTAGTGTTCCAGGTC     |
| 9  | AT5G44300 | Dormancy/auxin associated family protein | Development unspecified                                                                                  | F-GGTATCTCTTCCAGCGAGTC<br>R-GGTCTCGTTGCTATACATCC    |
| 10 | AT1G69260 | ABI five binding protein                 | Protein targeting nucleus                                                                                | F-CGATGCCTCTGTTTCGTGAAG<br>R-GCCATTCTTCTCAAAGTCTGC  |
| 11 | AT2G43140 | bHLH                                     | RNA.regulation of transcription.basic helix-loop-helix family (bHLH)                                     | F-CTCTCCGGCTGGATTCTACG<br>R-GCTTCAACCTCCGAGATTCCG   |
