# Supplementary material for: Rice (Oryza sativa L.) tau class glutathione S-transferase (OsGSTU30) overexpression in Arabidopsis thaliana modulates a regulatory network leading to heavy metal and drought stress tolerance
Source: Royal Society of Chemistry journal article supplement (doi:10.1039/c8mt00204e), 2018-11-21
Supplement: c8mt00204e3.xlsx [file c8mt00204e3.xlsx]

## Sheet: All Genes
Genes	Locus	Control	Treatment	Status	FPKM_Control	FPKM_Treatment	log2(fold_change)	test_stat	p_value	q_value	significant
AT1G01010.1	1:3630-5899	COI0	38600	OK	10.3874	9.06021	-0.197224	-0.581123	0.5708	0.998514	no
AT1G03987.1	1:11100-11372	COI0	38600	NOTEST	0	0	0	0	1	1	no
AT1G01040.1,AT1G01040.2	1:23120-33171	COI0	38600	OK	16.3265	14.9709	-0.125055	-0.336268	0.7545	0.998514	no
at1g01046	1:23120-33171	COI0	38600	OK	26.1148	24.5246	-0.0906403	-0.258599	0.4187	0.998514	no
AT1G03997.1	1:23120-33171	COI0	38600	NOTEST	0	0	0	0	1	1	no
AT1G01110.1,AT1G01110.2	1:51952-54737	COI0	38600	OK	2.94118	3.06927	0.0615041	0.140553	0.8872	0.998514	no
AT1G01160.1,AT1G01160.2	1:72338-74737	COI0	38600	OK	40.6053	41.9853	0.0482145	0.125548	0.8986	0.998514	no
AT1G04013.1	1:72338-74737	COI0	38600	OK	2.28816	4.23927	0.889627	0.0924186	0.27315	0.998514	no
AT1G01180.1	1:75389-76845	COI0	38600	OK	10.1333	8.44129	-0.263563	-0.654038	0.45295	0.998514	no
AT1G01210.1,AT1G01210.2,AT1G01210.3	1:88621-90502	COI0	38600	OK	32.4482	31.8257	-0.0279471	-0.115065	0.93295	0.998514	no
AT1G01220.1,AT1G01220.2,AT1G01220.3,AT1G01220.4,AT1G01220.5,AT1G01220.6,AT1G01220.7,AT1G01220.8	1:91341-95681	COI0	38600	OK	10.3553	12.8893	0.31581	1.03551	0.2906	0.998514	no
AT1G01225.1,AT1G01230.1	1:95934-99240	COI0	38600	OK	28.5823	24.6767	-0.211969	-0.607738	0.55235	0.998514	no
AT1G01240.1,AT1G01240.2,AT1G01240.3,AT1G01240.4,AT1G01240.5	1:99864-101987	COI0	38600	OK	9.37613	11.7244	0.322453	0.867561	0.3826	0.998514	no
AT1G01260.1,AT1G01260.2,AT1G01260.3	1:108945-111699	COI0	38600	OK	9.58252	7.98836	-0.262506	-0.792712	0.413	0.998514	no
AT1G01280.1	1:112262-113947	COI0	38600	OK	6.95978	2.43634	-1.51433	-3.01072	0.0028	0.176502	no
AT1G01290.1,AT1G01290.2	1:114201-116407	COI0	38600	OK	23.7243	20.6565	-0.199767	-0.627027	0.5248	0.998514	no
AT1G01300.1	1:116783-118845	COI0	38600	OK	45.6352	30.4631	-0.583085	-1.78987	0.03795	0.705063	no
AT1G01305.1	1:119380-119997	COI0	38600	NOTEST	0	0	0	0	1	1	no
AT1G01310.1	1:120153-130577	COI0	38600	OK	0.97645	0.0746302	-3.70971	-0.107038	0.2317	0.998514	no
AT1G01335.1	1:130735-130858	COI0	38600	NOTEST	0	0	0	0	1	1	no
AT1G01350.1	1:136089-138162	COI0	38600	OK	25.9201	27.5661	0.0888214	0.322466	0.764	0.998514	no
AT1G01355.1,AT1G01355.2,AT1G01355.3	1:138488-139680	COI0	38600	NOTEST	0	0.135334	inf	0	1	1	no
AT1G01360.1	1:141869-143261	COI0	38600	OK	23.3725	24.1651	0.0481131	0.203856	0.88135	0.998514	no
AT1G01370.1,AT1G01370.2,AT1G01370.3,AT1G01370.4	1:143488-146479	COI0	38600	OK	5.27733	4.4653	-0.24105	-0.493145	0.6107	0.998514	no
AT1G01380.1,AT1G01380.2,AT1G01380.3	1:147042-149848	COI0	38600	NOTEST	0.997	0.649085	-0.619188	0	1	1	no
AT1G01410.1	1:153112-154198	COI0	38600	NOTEST	0	0	0	0	1	1	no
AT1G01448.1,AT1G01448.2,AT1G01448.3	1:163277-166353	COI0	38600	OK	6.20212	5.55119	-0.159965	-0.455183	0.6998	0.998514	no
AT1G01460.1	1:168558-171386	COI0	38600	NOTEST	0.188503	0	#NAME?	0	1	1	no
AT1G01480.1,AT1G01480.2	1:175705-178406	COI0	38600	OK	1.31007	1.82587	0.478942	0.758517	0.4487	0.998514	no
AT1G01500.1,AT1G01510.1,AT1G01520.1,AT1G01520.2,AT1G01520.3,AT1G01520.4,AT1G01520.5	1:185032-192436	COI0	38600	OK	49.1433	53.0179	0.109485	0.394359	0.7202	0.998514	no
AT1G01540.1,AT1G01540.2	1:195644-198787	COI0	38600	OK	39.6757	48.2548	0.282418	1.01431	0.3007	0.998514	no
AT1G01550.1,AT1G01550.2	1:199526-201775	COI0	38600	OK	201.899	187.074	-0.110021	-0.373719	0.70235	0.998514	no
AT1G01560.1,AT1G01560.2,AT1G01560.3,AT1G01560.4	1:202102-204440	COI0	38600	OK	1.9415	1.31468	-0.562462	-0.823439	0.38985	0.998514	no
AT1G01570.2	1:204934-207642	COI0	38600	OK	1.61061	1.93461	0.26443	0.45667	0.63995	0.998514	no
AT1G01580.2	1:208994-213082	COI0	38600	OK	1.86052	1.59687	-0.220458	-0.401882	0.6797	0.998514	no
AT1G01590.1	1:214149-217734	COI0	38600	NOTEST	0.452605	0.221547	-1.03064	0	1	1	no
AT1G01600.1	1:218833-221286	COI0	38600	OK	9.14638	5.76992	-0.664648	-1.77778	0.0501	0.789109	no
AT1G01630.1	1:228798-232630	COI0	38600	OK	22.8321	22.4945	-0.0214936	-0.0675851	0.9447	0.998514	no
AT1G01690.1,AT1G01690.2,AT1G01690.3	1:249040-252522	COI0	38600	OK	3.54952	4.14304	0.223065	0.497367	0.6136	0.998514	no
AT1G01695.1	1:252625-254530	COI0	38600	NOTEST	0.476223	0.723874	0.604102	0	1	1	no
AT1G04033.1	1:255021-255384	COI0	38600	NOTEST	0	0	0	0	1	1	no
AT1G01710.1,AT1G01715.1,AT1G01715.2	1:262827-267883	COI0	38600	OK	33.8469	37.9425	0.164792	0.651687	0.5554	0.998514	no
AT1G01720.1	1:267992-274930	COI0	38600	OK	45.9492	58.5595	0.349863	1.04293	0.2818	0.998514	no
AT1G04047.1	1:267992-274930	COI0	38600	NOTEST	0	0	0	0	1	1	no
AT1G01730.1	1:267992-274930	COI0	38600	OK	22.3656	14.3685	-0.63837	-1.03987	0.3838	0.998514	no
AT1G01750.1,AT1G01750.2	1:275187-278599	COI0	38600	OK	1.07565	0.210238	-2.35511	-1.29384	0.32185	0.998514	no
AT1G04057.1	1:275187-278599	COI0	38600	NOTEST	0	0	0	0	1	1	no
AT1G01770.1,AT1G01780.1	1:278599-284245	COI0	38600	OK	22.0044	20.1382	-0.127856	-0.369069	0.6995	0.998514	no
AT1G01790.1,AT1G01790.2	1:284349-291203	COI0	38600	OK	32.1031	43.8274	0.449123	1.58223	0.1017	0.980785	no
AT1G01800.1,AT1G01800.2	1:293245-295086	COI0	38600	OK	80.6739	85.2831	0.0801582	0.282897	0.77525	0.998514	no
AT1G01810.1	1:295206-295859	COI0	38600	OK	3.60663	3.50629	-0.040705	-0.0793983	0.96125	0.998514	no
AT1G01840.1	1:303462-306310	COI0	38600	OK	1.91146	1.27111	-0.588591	-0.488375	0.6561	0.998514	no
AT1G04073.1	1:303462-306310	COI0	38600	NOTEST	0	0	0	0	1	1	no
AT1G01870.1	1:306383-306456	COI0	38600	NOTEST	0	0	0	0	1	1	no
AT1G01900.1	1:310168-319667	COI0	38600	OK	1.94431	2.80134	0.52686	0.445891	0.5725	0.998514	no
AT1G04083.1	1:310168-319667	COI0	38600	NOTEST	0	0	0	0	1	1	no
AT1G01920.1,AT1G01920.2,AT1G01920.3,AT1G01920.4,AT1G01920.5	1:310168-319667	COI0	38600	OK	14.7488	12.7603	-0.208931	-0.387064	0.69295	0.998514	no
AT1G01940.1	1:319768-324917	COI0	38600	OK	26.3123	27.4341	0.0602369	0.137538	0.8882	0.998514	no
AT1G01950.1,AT1G01950.2,AT1G01950.3,AT1G01950.4	1:325315-337912	COI0	38600	OK	14.2028	16.1453	0.184938	0.364198	0.72675	0.998514	no
AT1G01970.1	1:338240-340088	COI0	38600	OK	18.1268	29.8343	0.718845	2.92027	0.0199	0.533045	no
AT1G02000.1	1:345515-347603	COI0	38600	OK	7.14171	8.21178	0.201425	0.459443	0.5299	0.998514	no
AT1G02010.1,AT1G02010.2,AT1G02010.3,AT1G02010.4,AT1G02010.5,AT1G02010.6	1:347612-352545	COI0	38600	OK	8.81898	9.0167	0.0319871	0.0977072	0.9217	0.998514	no
AT1G02065.1,AT1G02065.2	1:365164-367443	COI0	38600	OK	6.87082	5.25469	-0.386875	-0.845179	0.2872	0.998514	no
AT1G02080.1,AT1G02080.2,AT1G02080.3	1:373334-386913	COI0	38600	OK	30.1727	35.7864	0.246167	0.841571	0.3933	0.998514	no
AT1G02100.1,AT1G02100.2,AT1G02100.3,AT1G02110.1	1:389811-395528	COI0	38600	OK	56.6513	51.0413	-0.150445	-0.50336	0.6221	0.998514	no
AT1G02120.1,AT1G02120.2,AT1G02120.3	1:395688-401919	COI0	38600	OK	51.0628	43.4211	-0.233876	-0.708562	0.4796	0.998514	no
AT1G04087.1	1:402085-402294	COI0	38600	NOTEST	0	0	0	0	1	1	no
AT1G02145.1,AT1G02145.2,AT1G02145.3,AT1G02145.4,AT1G02150.1	1:404599-410680	COI0	38600	OK	70.0403	74.0707	0.0807179	0.30347	0.7765	0.998514	no
AT1G02160.1,AT1G02160.2,AT1G02170.1	1:410743-414649	COI0	38600	OK	42.2974	41.2623	-0.035745	-0.128824	0.9185	0.998514	no
AT1G02190.1,AT1G02190.2	1:415073-418027	COI0	38600	OK	18.7131	9.9383	-0.912975	-3.02845	0.00235	0.158305	no
AT1G02205.1,AT1G02205.2,AT1G02205.3,AT1G02205.4,AT1G02205.5	1:418415-422579	COI0	38600	OK	85.7325	63.3167	-0.437255	-1.4781	0.1322	0.998514	no
AT1G04093.1	1:424665-425164	COI0	38600	NOTEST	0	0	0	0	1	1	no
AT1G02300.1	1:453106-455519	COI0	38600	OK	16.8063	14.2543	-0.237602	-0.976031	0.49875	0.998514	no
AT1G02305.1	1:455687-463618	COI0	38600	OK	82.8607	79.5303	-0.0591822	-0.219151	0.86815	0.998514	no
AT1G04103.1	1:455687-463618	COI0	38600	NOTEST	0	0	0	0	1	1	no
AT1G02320.1	1:455687-463618	COI0	38600	NOTEST	0.306969	0.783937	1.35264	0	1	1	no
AT1G02350.1	1:469817-470693	COI0	38600	OK	3.1633	2.27908	-0.47298	-1.00342	0.68105	0.998514	no
AT1G02370.1	1:474372-476612	COI0	38600	OK	8.00932	8.24702	0.0421941	0.142018	0.9086	0.998514	no
AT1G02380.1	1:476944-479112	COI0	38600	OK	2.92403	5.62716	0.944451	2.09678	0.07375	0.893805	no
AT1G02390.1	1:480649-483373	COI0	38600	OK	2.44719	2.62666	0.102108	0.245891	0.84345	0.998514	no
AT1G02400.1,AT1G02400.2	1:486799-489651	COI0	38600	OK	7.94742	8.00489	0.0103954	0.0253675	0.9815	0.998514	no
AT1G02410.1,AT1G02410.2,AT1G02410.3	1:490859-492979	COI0	38600	OK	23.72	22.4997	-0.0761949	-0.234501	0.8083	0.998514	no
AT1G02420.1	1:493638-497555	COI0	38600	OK	1.46005	1.35208	-0.110836	-0.177518	0.91855	0.998514	no
AT1G04123.1	1:493638-497555	COI0	38600	NOTEST	0	1.85996	inf	0	1	1	no
AT1G02480.1	1:515493-515566	COI0	38600	NOTEST	0	0	0	0	1	1	no
AT1G02490.1	1:516568-516866	COI0	38600	NOTEST	0.966584	0	#NAME?	0	1	1	no
AT1G02500.1,AT1G02500.2	1:518090-520495	COI0	38600	OK	277.3	289.858	0.0638973	0.186606	0.852	0.998514	no
AT1G02520.1,AT1G02520.2,AT1G02520.3	1:523535-529069	COI0	38600	OK	2.46345	2.30524	-0.0957629	-0.242858	0.8068	0.998514	no
AT1G02530.1,AT1G02530.2	1:529678-534677	COI0	38600	NOTEST	0.559644	0.221009	-1.3404	0	1	1	no
AT1G02550.1	1:536482-537211	COI0	38600	NOTEST	0	0	0	0	1	1	no
AT1G02560.1	1:537739-540127	COI0	38600	OK	162.478	193.62	0.252982	1.13769	0.38315	0.998514	no
AT1G02570.1	1:541235-542245	COI0	38600	NOTEST	0.563789	0.109423	-2.36524	0	1	1	no
AT1G02575.1	1:543010-544057	COI0	38600	NOTEST	0	0	0	0	1	1	no
AT1G02580.1,AT1G02580.2	1:544732-549202	COI0	38600	NOTEST	0.290036	0.123685	-1.22956	0	1	1	no
AT1G02600.1	1:552137-552761	COI0	38600	NOTEST	0	0	0	0	1	1	no
AT1G02620.1	1:557091-558774	COI0	38600	NOTEST	0.272754	0.512594	0.910215	0	1	1	no
AT1G04137.1	1:559734-560251	COI0	38600	NOTEST	0	0	0	0	1	1	no
AT1G02640.1	1:564017-567771	COI0	38600	OK	5.23813	6.86544	0.390302	1.0302	0.24105	0.998514	no
AT1G02650.1,AT1G02650.2	1:568557-570554	COI0	38600	OK	1.25531	1.41791	0.175719	0.27696	0.78285	0.998514	no
AT1G02670.1,AT1G02670.2,AT1G02670.3,AT1G02670.4,AT1G02670.5,AT1G02670.6,AT1G02670.7	1:575921-580532	COI0	38600	OK	2.59727	2.40174	-0.112919	-0.23237	0.8111	0.998514	no
AT1G02680.1	1:580624-582310	COI0	38600	OK	21.4114	19.9708	-0.100487	-0.338675	0.76705	0.998514	no
AT1G02690.1,AT1G02690.2	1:584133-587327	COI0	38600	OK	11.3182	10.6397	-0.0891927	-0.275472	0.7782	0.998514	no
AT1G02700.1	1:588002-589480	COI0	38600	OK	1.21745	0.474072	-1.36069	-1.45652	0.1278	0.998514	no
AT1G02705.1	1:589583-590406	COI0	38600	OK	3.43656	2.56458	-0.422238	-0.904658	0.7257	0.998514	no
AT1G02720.1,AT1G02720.2	1:591681-594264	COI0	38600	OK	8.84755	7.43035	-0.251847	-0.684859	0.48625	0.998514	no
AT1G02750.1,AT1G02750.2	1:602488-604387	COI0	38600	OK	24.8766	26.2267	0.0762458	0.221404	0.8251	0.998514	no
AT1G02760.1	1:604401-604474	COI0	38600	NOTEST	0	0	0	0	1	1	no
AT1G02810.1	1:618060-620502	COI0	38600	OK	2.35163	2.00966	-0.226714	-0.402366	0.63785	0.998514	no
AT1G02813.1	1:620677-621329	COI0	38600	OK	17.4566	4.35242	-2.00389	-4.82583	0.0024	0.160937	no
AT1G02816.1	1:621452-623054	COI0	38600	OK	14.099	20.8233	0.562602	2.72998	0.1108	0.998514	no
AT1G02840.1,AT1G02840.2,AT1G02840.3,AT1G02840.4,AT1G02840.5	1:626638-629993	COI0	38600	OK	131.698	124.215	-0.0843987	-0.290738	0.76885	0.998514	no
AT1G02850.1,AT1G02850.2,AT1G02850.3,AT1G02850.4,AT1G02850.5	1:630373-633420	COI0	38600	OK	61.4352	42.6981	-0.524894	-1.87391	0.05685	0.825426	no
AT1G02860.1,AT1G02860.2,AT1G02860.3	1:635143-638681	COI0	38600	OK	13.9547	20.5456	0.558081	1.59118	0.3064	0.998514	no
AT1G04153.1	1:635143-638681	COI0	38600	NOTEST	0	0	0	0	1	1	no
AT1G02952.1,AT1G02952.2	1:665118-666471	COI0	38600	NOTEST	0	0	0	0	1	1	no
AT1G02970.1	1:673305-676419	COI0	38600	OK	2.59249	2.56022	-0.0180703	-0.0403904	0.98105	0.998514	no
AT1G02980.1,AT1G02980.2	1:677359-687385	COI0	38600	OK	0.982645	0.583063	-0.753019	-0.57652	0.61525	0.998514	no
AT1G03010.1,AT1G03010.2,AT1G03010.3	1:693189-696504	COI0	38600	OK	3.12421	1.26255	-1.30715	-2.24953	0.0284	0.622516	no
AT1G03030.1,AT1G03030.2	1:701364-706689	COI0	38600	OK	18.5318	20.2587	0.12854	0.289724	0.79785	0.998514	no
AT1G03050.1	1:707484-711857	COI0	38600	OK	1.58605	0.0337988	-5.55232	-1.587	0.21965	0.998514	no
AT1G03070.1,AT1G03070.2,AT1G03070.3	1:729829-738306	COI0	38600	OK	2.00643	3.03008	0.594722	0.293725	0.8478	0.998514	no
AT1G03090.1,AT1G03090.2	1:739543-746701	COI0	38600	OK	8.15723	11.2445	0.463072	1.4075	0.14965	0.998514	no
AT1G04163.1	1:739543-746701	COI0	38600	OK	1.76045	1.9189	0.124338	0.104393	0.9182	0.998514	no
AT1G03103.1	1:747196-748057	COI0	38600	NOTEST	0	0	0	0	1	1	no
AT1G03110.1	1:749245-751976	COI0	38600	OK	14.6941	12.0915	-0.281241	-0.939829	0.409	0.998514	no
AT1G03120.1,AT1G03120.2	1:752190-753140	COI0	38600	OK	1.00051	0.755819	-0.404624	-0.326031	0.7459	0.998514	no
AT1G03150.1	1:756413-758678	COI0	38600	OK	33.9371	41.8397	0.302012	1.23849	0.33395	0.998514	no
AT1G03160.1,AT1G03160.2,AT1G03160.3,AT1G03160.4	1:761260-766194	COI0	38600	OK	26.6361	31.61	0.246998	0.879292	0.36825	0.998514	no
AT1G03165.1	1:766335-767385	COI0	38600	OK	3.00672	12.1581	2.01565	1.08524	0.143	0.998514	no
AT1G03170.1	1:768375-770684	COI0	38600	OK	5.46788	3.08354	-0.826393	-2.43868	0.0669	0.866814	no
AT1G03180.1,AT1G03180.2,AT1G03180.3,AT1G03180.4,AT1G03180.5,AT1G03180.6	1:773357-775362	COI0	38600	OK	3.44385	5.70415	0.727993	1.28734	0.1786	0.998514	no
AT1G03190.1,AT1G03190.2	1:775526-780062	COI0	38600	OK	9.11574	9.26617	0.0236133	0.0731461	0.9369	0.998514	no
AT1G04177.1	1:780106-780409	COI0	38600	NOTEST	0	0	0	0	1	1	no
AT1G03200.1,AT1G03210.1,AT1G03210.2	1:780518-784346	COI0	38600	OK	64.2912	72.1632	0.166641	0.898364	0.6242	0.998514	no
AT1G03220.1	1:786831-788722	COI0	38600	OK	46.8138	52.8854	0.175936	0.606837	0.5228	0.998514	no
AT1G03230.1	1:789819-791689	COI0	38600	OK	10.6672	7.30569	-0.546088	-1.48155	0.1096	0.998269	no
AT1G03270.1	1:799114-802625	COI0	38600	OK	4.42286	4.0197	-0.137894	-0.352472	0.7661	0.998514	no
AT1G03280.1,AT1G03280.2,AT1G03280.3	1:802969-807066	COI0	38600	OK	28.9273	28.2361	-0.0348939	-0.12267	0.8956	0.998514	no
AT1G03290.1,AT1G03290.2,AT1G03290.3,AT1G03290.4,AT1G03290.5,AT1G03290.6	1:807360-813216	COI0	38600	OK	20.403	21.0951	0.0481278	0.207347	0.8807	0.998514	no
AT1G03310.1,AT1G03310.2	1:813412-816812	COI0	38600	OK	26.1196	29.6125	0.181075	0.646727	0.5156	0.998514	no
AT1G03320.1	1:816988-817767	COI0	38600	NOTEST	0.207832	0.137918	-0.591615	0	1	1	no
AT1G03340.1	1:819611-821476	COI0	38600	OK	3.17359	3.10029	-0.0337118	-0.0822125	0.94985	0.998514	no
AT1G03360.1	1:824516-826399	COI0	38600	OK	27.2268	25.6356	-0.0868758	-0.368476	0.77865	0.998514	no
AT1G03365.1,AT1G03365.2	1:826522-830393	COI0	38600	OK	13.1205	14.3896	0.133198	0.442579	0.65645	0.998514	no
AT1G03370.1,AT1G03370.2	1:830549-835411	COI0	38600	OK	8.89555	8.45215	-0.0737651	-0.240634	0.80455	0.998514	no
AT1G03380.1	1:835766-842418	COI0	38600	OK	15.8735	17.1728	0.113504	0.451468	0.68935	0.998514	no
AT1G03395.1	1:835766-842418	COI0	38600	NOTEST	0	0	0	0	1	1	no
AT1G04183.1	1:844435-847683	COI0	38600	OK	17.4803	16.9394	-0.0453425	-0.134332	0.88715	0.998514	no
AT1G03430.1,AT1G03430.2	1:847792-849621	COI0	38600	OK	12.8059	10.3421	-0.308277	-0.742369	0.4548	0.998514	no
AT1G03440.1	1:852150-854297	COI0	38600	OK	13.7572	27.0357	0.974671	3.13476	0.00075	0.0729868	no
AT1G03490.1	1:871873-872906	COI0	38600	NOTEST	0.090392	0	#NAME?	0	1	1	no
AT1G03495.1	1:873165-874476	COI0	38600	OK	15.5219	19.7628	0.348483	1.10799	0.27775	0.998514	no
AT1G03515.1	1:877647-877719	COI0	38600	NOTEST	0	0	0	0	1	1	no
AT1G03540.1	1:883682-885611	COI0	38600	OK	1.93853	3.01103	0.635298	1.42497	0.24925	0.998514	no
AT1G03545.1,AT1G03545.2	1:885622-887972	COI0	38600	OK	1.94836	2.09332	0.103529	0.148179	0.90375	0.998514	no
AT1G03570.1	1:892513-892585	COI0	38600	NOTEST	0	0	0	0	1	1	no
AT1G03600.1	1:898479-899794	COI0	38600	OK	169.652	192.781	0.184384	0.750259	0.52405	0.998514	no
AT1G03610.1,AT1G03610.2	1:900731-903070	COI0	38600	OK	22.3474	36.0651	0.690496	2.3605	0.01395	0.44783	no
AT1G03630.1,AT1G03630.2	1:904031-909650	COI0	38600	OK	114.679	210.615	0.876999	2.85774	0.004	0.219565	no
AT1G04203.1	1:910022-913808	COI0	38600	NOTEST	0	0	0	0	1	1	no
AT1G03687.1,AT1G03687.2	1:918284-920592	COI0	38600	OK	10.3158	11.6369	0.173858	0.494612	0.614	0.998514	no
AT1G03700.1	1:920949-922098	COI0	38600	NOTEST	0.418702	0.313886	-0.415681	0	1	1	no
AT1G03710.1,AT1G03710.2	1:923389-924730	COI0	38600	OK	4.39146	2.99125	-0.553953	-0.883017	0.37435	0.998514	no
AT1G03740.1,AT1G03740.2	1:933425-937152	COI0	38600	OK	13.4947	10.6953	-0.335413	-1.10991	0.25755	0.998514	no
AT1G03750.1	1:937825-943377	COI0	38600	OK	3.95307	3.52526	-0.165242	-0.361334	0.7468	0.998514	no
AT1G03770.1,AT1G03770.2,AT1G03770.3,AT1G03770.4,AT1G03770.5,AT1G03770.6	1:944571-951850	COI0	38600	OK	5.69364	8.96642	0.655181	1.38914	0.1492	0.998514	no
AT1G03790.1	1:954289-956144	COI0	38600	OK	1.26228	1.51619	0.26442	0.503662	0.7025	0.998514	no
AT1G03810.1	1:958758-959609	COI0	38600	NOTEST	0.312437	0	#NAME?	0	1	1	no
AT1G03880.1	1:985750-988146	COI0	38600	NOTEST	0	0	0	0	1	1	no
AT1G03890.1	1:989197-991020	COI0	38600	NOTEST	0.0353518	0	#NAME?	0	1	1	no
AT1G03900.1	1:991105-993126	COI0	38600	OK	82.8998	68.4882	-0.275513	-0.846547	0.32255	0.998514	no
AT1G03905.1,AT1G03905.2,AT1G03905.3,AT1G03905.4	1:993399-995989	COI0	38600	OK	3.49174	2.68965	-0.376526	-0.676781	0.49095	0.998514	no
AT1G03910.1,AT1G03910.2	1:996075-1000629	COI0	38600	OK	34.8891	36.2628	0.0557165	0.19829	0.8383	0.998514	no
AT1G03920.1,AT1G03920.2,AT1G03920.3	1:1001115-1004410	COI0	38600	OK	2.06738	1.94082	-0.0911355	-0.166949	0.86215	0.998514	no
AT1G03930.1	1:1004687-1008370	COI0	38600	OK	23.4536	19.6682	-0.253942	-1.00578	0.37495	0.998514	no
AT1G04217.1	1:1008591-1008735	COI0	38600	NOTEST	0	212.002	inf	0	1	1	no
AT1G03935.1	1:1008809-1008896	COI0	38600	NOTEST	0	0	0	0	1	1	no
AT1G04223.1	1:1009072-1009189	COI0	38600	NOTEST	0	0	0	0	1	1	no
AT1G04227.1	1:1009227-1013365	COI0	38600	NOTEST	0	0	0	0	1	1	no
AT1G03960.1,AT1G03960.2,AT1G03960.3,AT1G03960.4,AT1G03960.5,AT1G03960.6,AT1G03960.7	1:1013642-1017957	COI0	38600	OK	7.7689	6.70487	-0.212502	-0.576006	0.5584	0.998514	no
AT1G03970.1	1:1018057-1019247	COI0	38600	OK	15.511	13.0116	-0.253492	-0.737899	0.48665	0.998514	no
AT1G03990.1	1:1024739-1027616	COI0	38600	OK	1.1331	1.34925	0.251879	0.390429	0.66335	0.998514	no
AT1G04020.1,AT1G04020.2	1:1036492-1040262	COI0	38600	OK	6.04429	6.27877	0.0549096	0.147752	0.87805	0.998514	no
AT1G04030.1,AT1G04030.2	1:1040374-1043887	COI0	38600	OK	4.08529	3.0896	-0.403017	-0.56243	0.5983	0.998514	no
AT1G04237.1	1:1040374-1043887	COI0	38600	OK	0	1.37433	inf	#NAME?	0.2135	0.998514	no
AT1G04080.1,AT1G04080.2,AT1G04080.3,AT1G04080.4,AT1G04080.5	1:1051311-1056827	COI0	38600	OK	49.2994	51.5073	0.0632058	0.222799	0.82265	0.998514	no
AT1G04090.1,AT1G04100.1	1:1057040-1061209	COI0	38600	OK	2.1697	1.77754	-0.287612	-0.55145	0.68065	0.998514	no
AT1G04130.1,AT1G04130.2	1:1073273-1080630	COI0	38600	OK	20.5121	19.7004	-0.0582474	-0.0959976	0.9346	0.998514	no
AT1G04160.1,AT1G04160.2	1:1086169-1096510	COI0	38600	OK	3.11868	2.97171	-0.0696449	-0.194152	0.8455	0.998514	no
AT1G04170.1,AT1G04170.2	1:1096881-1099901	COI0	38600	OK	80.0607	80.7453	0.0122836	0.0434169	0.9639	0.998514	no
AT1G04180.1	1:1104492-1106241	COI0	38600	NOTEST	0.26554	0.181512	-0.548866	0	1	1	no
AT1G04200.1,AT1G04200.2,AT1G04200.3	1:1109394-1114155	COI0	38600	OK	15.4829	14.0814	-0.136885	-0.443936	0.65085	0.998514	no
AT1G04210.1	1:1114374-1122786	COI0	38600	OK	26.9856	32.41	0.264251	0.971517	0.41545	0.998514	no
AT1G04247.1	1:1114374-1122786	COI0	38600	OK	17.3108	14.5162	-0.254005	-0.38352	0.6965	0.998514	no
AT1G04230.1,AT1G04230.2	1:1125514-1129689	COI0	38600	OK	10.935	11.5936	0.0843682	0.188036	0.87715	0.998514	no
AT1G04250.1	1:1136077-1138663	COI0	38600	OK	28.1272	31.3468	0.156355	0.600568	0.60235	0.998514	no
AT1G04295.1	1:1147296-1154667	COI0	38600	OK	6.59374	2.26668	-1.54051	-0.861908	0.64935	0.998514	no
AT1G04320.1	1:1159022-1159093	COI0	38600	NOTEST	0	0	0	0	1	1	no
AT1G04350.1	1:1164909-1167135	COI0	38600	OK	69.1284	73.0368	0.0793442	0.424722	0.76835	0.998514	no
AT1G04370.1	1:1175032-1175768	COI0	38600	NOTEST	0.106437	0.266812	1.32583	0	1	1	no
AT1G04257.1	1:1178924-1179176	COI0	38600	NOTEST	0	0	0	0	1	1	no
AT1G04420.1	1:1191518-1193884	COI0	38600	OK	55.7435	90.8766	0.705105	2.83041	0.01375	0.44383	no
AT1G04425.1	1:1194186-1196889	COI0	38600	OK	3.4803	1.45067	-1.26249	-2.35863	0.29555	0.998514	no
AT1G04430.1,AT1G04430.2,AT1G04430.3	1:1197955-1201579	COI0	38600	OK	49.8728	48.9649	-0.0265065	-0.0935794	0.92415	0.998514	no
AT1G04440.1	1:1202159-1206009	COI0	38600	OK	36.4342	38.3551	0.0741241	0.365576	0.78835	0.998514	no
AT1G04445.1,AT1G04445.2	1:1206759-1207939	COI0	38600	NOTEST	0	0.404017	inf	0	1	1	no
AT1G04450.1	1:1208520-1210026	COI0	38600	NOTEST	0.410878	0	#NAME?	0	1	1	no
AT1G04455.1	1:1210268-1210622	COI0	38600	NOTEST	0	0	0	0	1	1	no
AT1G04480.1	1:1215924-1217471	COI0	38600	OK	201.311	212.575	0.0785464	0.279075	0.7705	0.998514	no
AT1G04267.1	1:1215924-1217471	COI0	38600	NOTEST	0	0	0	0	1	1	no
AT1G04273.1	1:1215924-1217471	COI0	38600	NOTEST	0	0	0	0	1	1	no
AT1G04277.1	1:1215924-1217471	COI0	38600	NOTEST	0	0	0	0	1	1	no
AT1G04510.1,AT1G04510.2	1:1226482-1230947	COI0	38600	OK	36.172	46.0399	0.348014	1.22865	0.20955	0.998514	no
AT1G04520.1	1:1231451-1234032	COI0	38600	OK	20.9432	22.3996	0.0969885	0.347581	0.7465	0.998514	no
AT1G04540.1	1:1236753-1239199	COI0	38600	OK	3.66754	1.70394	-1.10594	-2.39201	0.02555	0.595048	no
AT1G04550.1,AT1G04550.2	1:1240293-1242157	COI0	38600	OK	45.0656	39.7886	-0.17967	-0.617555	0.52085	0.998514	no
AT1G04555.1	1:1242505-1244244	COI0	38600	OK	6.99868	5.25949	-0.41216	-1.02255	0.41265	0.998514	no
AT1G04560.1	1:1244946-1246059	COI0	38600	NOTEST	0	0	0	0	1	1	no
AT1G04600.1	1:1261761-1272588	COI0	38600	NOTEST	0.370507	0.176106	-1.07306	0	1	1	no
AT1G04610.1	1:1279350-1281618	COI0	38600	OK	0.773834	0.321563	-1.26692	-1.42403	0.19285	0.998514	no
AT1G04635.1,AT1G04640.1,AT1G04640.2	1:1291299-1293398	COI0	38600	OK	44.2412	55.0859	0.316292	1.08794	0.27915	0.998514	no
AT1G04283.1	1:1299552-1299796	COI0	38600	NOTEST	0	0	0	0	1	1	no
AT1G04670.1	1:1301828-1302758	COI0	38600	OK	1.94362	0.154291	-3.65502	-2.906	0.1195	0.998514	no
AT1G04690.1	1:1313442-1315823	COI0	38600	OK	81.3168	90.0842	0.147722	0.67023	0.5997	0.998514	no
AT1G04700.1,AT1G04700.2,AT1G04700.3	1:1316138-1321000	COI0	38600	OK	0.808713	0.555335	-0.54227	-0.844895	0.39515	0.998514	no
AT1G04710.1	1:1321884-1324840	COI0	38600	OK	20.6374	25.1941	0.287825	1.05487	0.33425	0.998514	no
AT1G04720.1	1:1324922-1325007	COI0	38600	NOTEST	0	0	0	0	1	1	no
AT1G04287.1	1:1333695-1334012	COI0	38600	NOTEST	0	0	0	0	1	1	no
AT1G04760.1,AT1G04760.2	1:1334532-1337849	COI0	38600	OK	2.68591	2.20271	-0.286126	-0.341779	0.80185	0.998514	no
AT1G04778.1	1:1339587-1343793	COI0	38600	OK	1.07322	0.653113	-0.716544	-0.236762	0.8017	0.998514	no
AT1G04790.1	1:1344988-1349478	COI0	38600	OK	22.1038	21.7014	-0.0265008	-0.0718432	0.945	0.998514	no
AT1G04810.1	1:1350079-1355466	COI0	38600	OK	16.7825	20.2398	0.27024	0.989604	0.34195	0.998514	no
AT1G04900.1	1:1383840-1391381	COI0	38600	OK	10.8883	10.8714	-0.00223976	-0.00489795	0.99555	0.998514	no
AT1G04303.1	1:1383840-1391381	COI0	38600	NOTEST	0	0	0	0	1	1	no
AT1G04940.1,AT1G04945.1,AT1G04945.2,AT1G04945.3,AT1G04945.4	1:1399173-1407531	COI0	38600	OK	66.1547	85.8548	0.376056	1.61151	0.26395	0.998514	no
AT1G04970.1,AT1G04970.2,AT1G04970.3	1:1411087-1413627	COI0	38600	OK	34.6537	42.1225	0.281584	0.986133	0.30905	0.998514	no
AT1G05000.1,AT1G05000.2,AT1G05000.3	1:1425538-1428869	COI0	38600	OK	24.6403	18.6631	-0.400828	-1.21217	0.2169	0.998514	no
AT1G05005.1	1:1429047-1430056	COI0	38600	NOTEST	0	0	0	0	1	1	no
AT1G05035.1	1:1444691-1446116	COI0	38600	NOTEST	0	0	0	0	1	1	no
AT1G04323.1	1:1446834-1447073	COI0	38600	NOTEST	0	0	0	0	1	1	no
AT1G05080.1	1:1459090-1460579	COI0	38600	NOTEST	0.268619	0	#NAME?	0	1	1	no
AT1G05085.1	1:1460987-1461670	COI0	38600	NOTEST	0	0	0	0	1	1	no
AT1G04327.1	1:1461933-1462340	COI0	38600	NOTEST	0	0	0	0	1	1	no
AT1G05087.1,AT1G05087.2	1:1463107-1464173	COI0	38600	OK	3.80583	3.61953	-0.072409	-0.119662	0.9023	0.998514	no
AT1G05090.1	1:1464238-1465875	COI0	38600	OK	1.13178	0.4187	-1.43461	-1.82816	0.14105	0.998514	no
AT1G05100.1	1:1469540-1470881	COI0	38600	OK	1.05569	2.19852	1.05835	1.48753	0.1319	0.998514	no
AT1G05136.1	1:1478922-1479063	COI0	38600	NOTEST	0	0	0	0	1	1	no
AT1G05140.1	1:1482545-1484059	COI0	38600	OK	73.9956	106.488	0.52518	2.40986	0.05975	0.838779	no
AT1G04337.1	1:1496734-1497102	COI0	38600	NOTEST	0	0	0	0	1	1	no
AT1G05200.1,AT1G05200.2,AT1G05200.3,AT1G05200.4,AT1G05200.5,AT1G05200.6,AT1G05200.7	1:1504940-1510341	COI0	38600	OK	24.4501	18.6914	-0.387468	-1.55795	0.2147	0.998514	no
AT1G04347.1	1:1504940-1510341	COI0	38600	NOTEST	0	0.600094	inf	0	1	1	no
AT1G05210.1	1:1510403-1511683	COI0	38600	OK	11.5997	7.55123	-0.619302	-2.04696	0.2511	0.998514	no
AT1G05220.1	1:1511894-1518900	COI0	38600	NOTEST	0.800313	0.394707	-1.01978	0	1	1	no
AT1G05240.1	1:1520277-1523023	COI0	38600	NOTEST	0	0.0384538	inf	0	1	1	no
AT1G04363.1	1:1523560-1524069	COI0	38600	NOTEST	0	0	0	0	1	1	no
AT1G05260.1	1:1529766-1531484	COI0	38600	OK	6.09322	4.52728	-0.428559	-0.937558	0.3454	0.998514	no
AT1G04383.1	1:1542968-1543394	COI0	38600	NOTEST	0	0	0	0	1	1	no
AT1G04387.1	1:1543642-1544093	COI0	38600	NOTEST	0	0	0	0	1	1	no
AT1G05320.1,AT1G05320.2,AT1G05320.3,AT1G05320.4,AT1G05320.5,AT1G05320.6,AT1G05320.7,AT1G05320.8,AT1G05320.9	1:1553567-1557848	COI0	38600	OK	10.7362	14.0508	0.388165	1.24687	0.2067	0.998514	no
AT1G05330.1	1:1558057-1558745	COI0	38600	OK	1.24497	0.56285	-1.14529	-1.46614	0.38045	0.998514	no
AT1G05360.1,AT1G05360.2,AT1G05360.3	1:1564490-1567508	COI0	38600	OK	12.9251	16.9368	0.389983	1.10301	0.25945	0.998514	no
AT1G05380.1,AT1G05380.2,AT1G05380.3	1:1576821-1583760	COI0	38600	OK	18.0058	22.0404	0.291689	1.02239	0.33735	0.998514	no
AT1G05400.1,AT1G05400.2	1:1584072-1587794	COI0	38600	OK	2.94326	2.53726	-0.214139	-0.235132	0.8489	0.998514	no
AT1G05420.2	1:1589972-1591012	COI0	38600	OK	1.31433	0.817142	-0.685668	-0.798151	0.41645	0.998514	no
AT1G05450.1,AT1G05450.2	1:1599875-1605034	COI0	38600	OK	4.10672	0.80527	-2.35044	-1.99938	0.18775	0.998514	no
AT1G05500.1,AT1G05500.2	1:1624918-1629289	COI0	38600	OK	31.9266	32.5991	0.0300765	0.10564	0.9142	0.998514	no
AT1G05510.1	1:1629445-1636018	COI0	38600	NOTEST	0	0	0	0	1	1	no
AT1G05540.1,AT1G05540.2	1:1639222-1640879	COI0	38600	OK	13.1095	11.1945	-0.227825	-0.647992	0.50885	0.998514	no
AT1G04397.1	1:1661407-1662259	COI0	38600	NOTEST	0	0	0	0	1	1	no
AT1G05590.1,AT1G05590.2,AT1G05590.3,AT1G05600.1,AT1G05600.2,AT1G05600.3	1:1669349-1676077	COI0	38600	OK	18.3305	19.2654	0.0717667	0.302774	0.81855	0.998514	no
AT1G05620.1,AT1G05620.2	1:1678880-1681710	COI0	38600	OK	12.3909	7.95221	-0.639853	-1.67327	0.0873	0.936932	no
AT1G05630.1,AT1G05630.2,AT1G05630.3	1:1682223-1687363	COI0	38600	OK	6.76687	5.90272	-0.197109	-0.637872	0.51575	0.998514	no
AT1G05690.1	1:1706735-1709360	COI0	38600	OK	4.45826	7.10375	0.672098	2.17529	0.12505	0.998514	no
AT1G05700.1,AT1G05700.2	1:1709672-1713474	COI0	38600	OK	0.483373	0.817554	0.758177	1.02265	0.30415	0.998514	no
AT1G05710.1,AT1G05710.10,AT1G05710.11,AT1G05710.12,AT1G05710.13,AT1G05710.14,AT1G05710.2,AT1G05710.3,AT1G05710.4,AT1G05710.5,AT1G05710.6,AT1G05710.7,AT1G05710.8,AT1G05710.9	1:1714817-1717290	COI0	38600	OK	13.5367	14.4344	0.0926358	0.258704	0.78895	0.998514	no
AT1G04413.1	1:1717388-1721309	COI0	38600	NOTEST	0	0	0	0	1	1	no
AT1G05730.1,AT1G05730.2,AT1G05740.1	1:1717388-1721309	COI0	38600	OK	3.03978	1.69515	-0.842548	-1.04895	0.28575	0.998514	no
AT1G05750.1,AT1G05750.2	1:1721508-1724734	COI0	38600	OK	2.56781	3.216	0.324726	0.847848	0.52	0.998514	no
AT1G05780.1	1:1726557-1728520	COI0	38600	OK	6.73138	4.07385	-0.72451	-1.20898	0.22435	0.998514	no
at1g04423	1:1726557-1728520	COI0	38600	NOTEST	0	0	0	0	1	1	no
AT1G04427.1	1:1728657-1729890	COI0	38600	OK	8.37489	18.6247	1.15307	1.17463	0.2467	0.998514	no
AT1G05785.1,AT1G05785.2,AT1G05785.3,AT1G05785.4,AT1G05785.5,AT1G05785.6,AT1G05785.7	1:1730241-1732657	COI0	38600	OK	23.106	20.0656	-0.203541	-0.49877	0.61085	0.998514	no
AT1G05790.1,AT1G05790.2,AT1G05790.3,AT1G05790.4	1:1732801-1737583	COI0	38600	OK	12.0886	11.7584	-0.0399514	-0.127215	0.8927	0.998514	no
AT1G05800.1	1:1741203-1742619	COI0	38600	NOTEST	0	0	0	0	1	1	no
AT1G05805.1	1:1744443-1747734	COI0	38600	OK	9.37275	10.1425	0.113869	0.315974	0.7352	0.998514	no
AT1G05810.2,AT1G05820.1,AT1G05820.2,AT1G05820.3,AT1G05820.4	1:1748258-1754036	COI0	38600	OK	7.98036	7.12796	-0.162965	-0.409153	0.6929	0.998514	no
AT1G05830.1,AT1G05830.2,AT1G05830.3,AT1G05830.4	1:1754129-1761909	COI0	38600	OK	13.2571	14.62	0.14117	0.493167	0.61585	0.998514	no
AT1G05835.1	1:1762144-1766283	COI0	38600	OK	10.8813	6.15694	-0.821563	-1.22648	0.4621	0.998514	no
AT1G04437.1	1:1762144-1766283	COI0	38600	NOTEST	0	0	0	0	1	1	no
AT1G05860.1,AT1G05860.2,AT1G05860.3	1:1768985-1771286	COI0	38600	OK	16.6405	17.6915	0.0883548	0.262615	0.78855	0.998514	no
AT1G05880.1,AT1G05880.2,AT1G05880.3	1:1775642-1778553	COI0	38600	NOTEST	0.113863	0.065089	-0.806811	0	1	1	no
AT1G05890.1,AT1G05890.2	1:1779255-1784675	COI0	38600	OK	50.7942	45.3498	-0.163568	-0.580629	0.55645	0.998514	no
AT1G05894.1	1:1784735-1786326	COI0	38600	NOTEST	0.428111	0.444151	0.0530654	0	1	1	no
AT1G05900.1,AT1G05900.2	1:1786848-1789737	COI0	38600	OK	18.3128	26.877	0.553522	1.73233	0.0822	0.921304	no
AT1G05910.1	1:1790215-1796715	COI0	38600	OK	10.2671	12.4241	0.275116	0.934507	0.334	0.998514	no
AT1G05920.1	1:1796777-1798254	COI0	38600	NOTEST	0.313906	0.241394	-0.378943	0	1	1	no
AT1G05930.1	1:1799417-1800933	COI0	38600	NOTEST	0	0	0	0	1	1	no
AT1G05980.1	1:1817399-1817471	COI0	38600	NOTEST	0	0	0	0	1	1	no
AT1G05990.1	1:1818391-1819184	COI0	38600	NOTEST	0.170357	0	#NAME?	0	1	1	no
AT1G06002.1	1:1820253-1821894	COI0	38600	NOTEST	0.0337702	0	#NAME?	0	1	1	no
AT1G06010.1,AT1G06020.1	1:1822582-1826163	COI0	38600	OK	14.6838	11.3802	-0.367705	-1.00639	0.4311	0.998514	no
AT1G06030.1	1:1826802-1828279	COI0	38600	NOTEST	0.281463	0.470422	0.741007	0	1	1	no
AT1G06045.1	1:1828339-1829983	COI0	38600	OK	51.7698	12.0483	-2.10328	-0.315488	0.5187	0.998514	no
AT1G06060.1,AT1G06060.2	1:1832940-1837758	COI0	38600	OK	34.1918	30.3649	-0.171248	-0.523183	0.6847	0.998514	no
AT1G06080.1,AT1G06080.2	1:1843462-1846311	COI0	38600	OK	25.6674	16.0852	-0.674201	-2.04354	0.039	0.709163	no
AT1G06090.1	1:1846700-1849693	COI0	38600	OK	1.24455	0.658139	-0.919154	-1.70703	0.24525	0.998514	no
AT1G06100.1	1:1851471-1853019	COI0	38600	NOTEST	0.703408	0.811135	0.20558	0	1	1	no
AT1G06120.1	1:1855909-1857718	COI0	38600	NOTEST	0	0	0	0	1	1	no
AT1G06135.1	1:1862183-1862742	COI0	38600	NOTEST	0	0.528035	inf	0	1	1	no
AT1G06140.1	1:1864773-1866999	COI0	38600	OK	0.971859	1.67266	0.783326	1.70292	0.2814	0.998514	no
AT1G06160.1	1:1882906-1883992	COI0	38600	OK	3.3789	2.56616	-0.396944	-0.711853	0.5086	0.998514	no
AT1G04447.1	1:1887403-1887728	COI0	38600	NOTEST	0	0	0	0	1	1	no
AT1G06180.1	1:1889361-1891276	COI0	38600	OK	27.7014	17.9127	-0.628971	-2.23978	0.0638	0.852416	no
AT1G06210.1,AT1G06210.2	1:1897128-1899237	COI0	38600	OK	24.9892	28.177	0.173213	0.592349	0.53925	0.998514	no
AT1G06220.1,AT1G06220.2,AT1G06220.3	1:1899950-1904897	COI0	38600	OK	33.1167	38.2652	0.208473	0.74051	0.45725	0.998514	no
AT1G06225.1	1:1905917-1906298	COI0	38600	NOTEST	0	0	0	0	1	1	no
AT1G06230.1,AT1G06230.2,AT1G06230.3,AT1G06230.4,AT1G06240.1	1:1906962-1917661	COI0	38600	OK	51.2362	54.4497	0.0877603	0.302548	0.78285	0.998514	no
AT1G06260.1	1:1906962-1917661	COI0	38600	OK	17.7203	6.2446	-1.50472	-1.36299	0.20555	0.998514	no
AT1G06290.1	1:1922207-1926278	COI0	38600	OK	32.6668	39.175	0.26211	0.991189	0.34415	0.998514	no
AT1G06310.1	1:1926651-1930397	COI0	38600	NOTEST	0.125214	0.110223	-0.18397	0	1	1	no
AT1G06320.1	1:1930522-1932429	COI0	38600	NOTEST	0.39366	0	#NAME?	0	1	1	no
AT1G06380.1	1:1944992-1946303	COI0	38600	OK	16.2963	15.8595	-0.0391981	-0.158048	0.9142	0.998514	no
AT1G06390.1,AT1G06390.2	1:1946745-1952880	COI0	38600	OK	77.4926	87.7732	0.179723	0.618528	0.6265	0.998514	no
AT1G06410.1,AT1G06410.2,AT1G06410.3,AT1G06420.1,AT1G06420.2	1:1954673-1960027	COI0	38600	OK	59.3428	65.7315	0.147512	0.543857	0.62755	0.998514	no
AT1G06450.1	1:1965839-1969656	COI0	38600	OK	1.85591	1.01499	-0.870666	-0.70321	0.60935	0.998514	no
AT1G04467.1	1:1965839-1969656	COI0	38600	NOTEST	0.326096	0	#NAME?	0	1	1	no
AT1G06470.1,AT1G06470.2,AT1G06470.3,AT1G06470.4	1:1969657-1974526	COI0	38600	OK	13.5368	11.181	-0.275845	-1.1516	0.3793	0.998514	no
AT1G06480.1	1:1978083-1978157	COI0	38600	NOTEST	0	0	0	0	1	1	no
AT1G06490.1,AT1G06490.2	1:1978377-1989409	COI0	38600	OK	2.05132	2.16888	0.0803975	0.212475	0.8244	0.998514	no
AT1G06500.1,AT1G06500.2,AT1G06500.3,AT1G06500.4	1:1989478-1992228	COI0	38600	OK	27.8912	29.3036	0.0712684	0.201548	0.86465	0.998514	no
AT1G04477.1	1:1989478-1992228	COI0	38600	OK	1.34212	1.22077	-0.136722	-0.0326801	0.68975	0.998514	no
AT1G06510.1	1:1992228-1993841	COI0	38600	OK	26.439	32.1812	0.28355	1.15094	0.3568	0.998514	no
AT1G06530.1	1:2001381-2003446	COI0	38600	NOTEST	0	0	0	0	1	1	no
AT1G06560.1	1:2007614-2013545	COI0	38600	OK	13.1085	17.1811	0.39032	0.604199	0.54805	0.998514	no
AT1G06610.1	1:2025355-2025428	COI0	38600	NOTEST	0	0	0	0	1	1	no
AT1G06620.1,AT1G06620.2	1:2025543-2027413	COI0	38600	OK	5.17004	4.61593	-0.163553	-0.38159	0.69295	0.998514	no
AT1G06630.1,AT1G06630.2,AT1G06630.3,AT1G06630.4,AT1G06630.5,AT1G06630.6,AT1G06630.7,AT1G06630.8,AT1G06630.9	1:2027605-2031388	COI0	38600	OK	21.894	23.821	0.121693	0.386811	0.69	0.998514	no
AT1G06640.1,AT1G06640.2,AT1G06640.3,AT1G06645.1,AT1G06650.1,AT1G06650.2	1:2031625-2052170	COI0	38600	OK	73.9083	93.5226	0.339578	0.1873	0.88395	0.998514	no
AT1G06670.1,AT1G06670.2,AT1G06680.1,AT1G06680.2	1:2031625-2052170	COI0	38600	OK	1234.09	1660.08	0.427811	0.736987	0.4486	0.998514	no
AT1G04493.1	1:2055744-2067483	COI0	38600	NOTEST	0	0	0	0	1	1	no
AT1G04497.1	1:2055744-2067483	COI0	38600	NOTEST	0	0	0	0	1	1	no
AT1G06730.1	1:2067508-2070455	COI0	38600	OK	8.76244	10.8058	0.302405	0.925378	0.36945	0.998514	no
AT1G06740.1,AT1G06750.1,AT1G06750.2,AT1G06750.3	1:2070736-2077767	COI0	38600	OK	72.9268	38.9716	-0.904026	-1.1952	0.23375	0.998514	no
AT1G06780.1,AT1G06780.2,AT1G06790.1,AT1G06790.2	1:2083310-2091686	COI0	38600	OK	29.528	33.6503	0.188536	0.731572	0.5709	0.998514	no
AT1G06830.1	1:2097105-2097655	COI0	38600	OK	18.8427	9.72451	-0.95431	-3.44203	0.09885	0.975349	no
AT1G06850.1,AT1G06850.2	1:2105047-2106749	COI0	38600	OK	9.63126	10.2791	0.0939162	0.242559	0.80395	0.998514	no
AT1G06870.1	1:2108511-2110986	COI0	38600	OK	14.9323	14.3561	-0.056768	-0.202402	0.8556	0.998514	no
AT1G06910.1	1:2120990-2123801	COI0	38600	OK	5.64596	6.72138	0.251539	0.738664	0.5567	0.998514	no
AT1G06923.1	1:2126669-2128611	COI0	38600	NOTEST	0	0.123197	inf	0	1	1	no
AT1G06930.1	1:2128842-2129883	COI0	38600	NOTEST	0	0	0	0	1	1	no
AT1G06960.1,AT1G06960.2,AT1G06960.3,AT1G06960.4,AT1G06960.5,AT1G06960.6,AT1G06970.1	1:2135809-2140975	COI0	38600	OK	15.7096	13.9834	-0.167925	-0.612605	0.64	0.998514	no
AT1G06990.1	1:2148341-2150152	COI0	38600	OK	1.98721	1.64139	-0.275826	-0.43209	0.6776	0.998514	no
AT1G07010.1,AT1G07010.2,AT1G07010.3	1:2152797-2156153	COI0	38600	OK	103.964	120.886	0.217566	0.796733	0.46135	0.998514	no
at1g07051	1:2165516-2165746	COI0	38600	NOTEST	0	0	0	0	1	1	no
AT1G04557.1	1:2166347-2168397	COI0	38600	NOTEST	4.92051	0	#NAME?	0	1	1	no
AT1G07070.1,AT1G07080.1	1:2168560-2172194	COI0	38600	OK	113.804	123.098	0.11326	0.426522	0.6838	0.998514	no
AT1G07100.1	1:2177884-2177958	COI0	38600	NOTEST	0	0	0	0	1	1	no
AT1G07130.1	1:2184317-2188734	COI0	38600	OK	11.8603	10.1608	-0.223127	-0.556741	0.6092	0.998514	no
AT1G04563.1	1:2184317-2188734	COI0	38600	NOTEST	2.722	0	#NAME?	0	1	1	no
AT1G07170.1,AT1G07170.2,AT1G07170.3,AT1G07170.4,AT1G07170.5,AT1G07170.6	1:2199996-2201272	COI0	38600	OK	31.317	27.8593	-0.168789	-0.478421	0.62665	0.998514	no
AT1G07175.1,AT1G07175.2	1:2202277-2203366	COI0	38600	NOTEST	0	0	0	0	1	1	no
AT1G07180.1	1:2204103-2207099	COI0	38600	OK	68.8086	92.5039	0.426924	1.8252	0.1366	0.998514	no
AT1G07190.1	1:2208012-2208177	COI0	38600	NOTEST	0	0	0	0	1	1	no
AT1G07210.1	1:2215215-2219649	COI0	38600	OK	43.8992	44.813	0.0297242	0.0925654	0.9285	0.998514	no
AT1G04567.1	1:2215215-2219649	COI0	38600	NOTEST	0	0.534942	inf	0	1	1	no
AT1G07240.1	1:2223624-2225524	COI0	38600	OK	12.9897	7.60807	-0.771765	-2.26992	0.02405	0.580586	no
AT1G07250.1	1:2225758-2229357	COI0	38600	OK	17.8863	20.2027	0.175691	0.604196	0.56995	0.998514	no
AT1G07280.1,AT1G07280.2,AT1G07280.3,AT1G07280.4	1:2238016-2241471	COI0	38600	OK	16.6353	11.7836	-0.497469	-1.63067	0.09705	0.96846	no
AT1G07320.1,AT1G07320.2,AT1G07320.3,AT1G07320.4	1:2248966-2250529	COI0	38600	OK	127.095	169.717	0.417222	1.4313	0.1485	0.998514	no
AT1G07330.1,AT1G07330.2	1:2250919-2254036	COI0	38600	NOTEST	0.132138	0.0759636	-0.79866	0	1	1	no
AT1G07340.1	1:2254821-2256850	COI0	38600	OK	2.85609	0.866988	-1.71996	-3.11912	0.02665	0.603015	no
AT1G07370.1	1:2263036-2264553	COI0	38600	OK	24.6697	19.2003	-0.361608	-1.23309	0.2651	0.998514	no
AT1G07390.2,AT1G07390.3,AT1G07390.4,AT1G07390.5,AT1G07400.1	1:2269621-2275783	COI0	38600	OK	31.074	26.5848	-0.225108	-0.721287	0.47555	0.998514	no
AT1G07410.1,AT1G07420.1,AT1G07420.2	1:2276029-2280502	COI0	38600	OK	20.6009	24.1993	0.232261	0.748453	0.4612	0.998514	no
AT1G07460.1,AT1G07460.2	1:2289958-2291101	COI0	38600	NOTEST	0	0	0	0	1	1	no
AT1G07470.1,AT1G07470.2	1:2291368-2294558	COI0	38600	OK	14.8673	18.1734	0.289682	0.909655	0.3537	0.998514	no
AT1G04583.1	1:2294565-2295489	COI0	38600	NOTEST	0.32506	0.209309	-0.635073	0	1	1	no
AT1G07476.1	1:2295552-2299544	COI0	38600	NOTEST	0	0	0	0	1	1	no
AT1G04587.1	1:2295552-2299544	COI0	38600	OK	0	7.9439	inf	#NAME?	0.2153	0.998514	no
AT1G07485.1	1:2301374-2302121	COI0	38600	NOTEST	0.338745	0	#NAME?	0	1	1	no
AT1G07510.1	1:2304434-2312399	COI0	38600	OK	9.91392	9.87304	-0.00596135	-0.0191788	0.98475	0.998514	no
AT1G04593.1	1:2318142-2321961	COI0	38600	NOTEST	0	0	0	0	1	1	no
AT1G07560.1	1:2327314-2333767	COI0	38600	NOTEST	0.601417	0.516781	-0.218811	0	1	1	no
AT1G04597.1	1:2334332-2334599	COI0	38600	NOTEST	0	0	0	0	1	1	no
AT1G07580.1	1:2334821-2334894	COI0	38600	NOTEST	0	0	0	0	1	1	no
AT1G04603.1	1:2340558-2341109	COI0	38600	NOTEST	0	0	0	0	1	1	no
AT1G07610.1	1:2341446-2342148	COI0	38600	OK	136.086	138.049	0.0206594	0.146793	0.9426	0.998514	no
AT1G07630.1	1:2348914-2351799	COI0	38600	OK	14.4377	9.40948	-0.61765	-2.12579	0.0466	0.766803	no
AT1G07660.1,AT1G07660.2	1:2368832-2369735	COI0	38600	OK	43.6674	48.4622	0.150304	0.468569	0.6329	0.998514	no
AT1G07680.1	1:2376011-2377186	COI0	38600	NOTEST	0	0	0	0	1	1	no
AT1G07690.1,AT1G07690.2,AT1G07690.3,AT1G07690.4	1:2377975-2379207	COI0	38600	NOTEST	0	0	0	0	1	1	no
AT1G07700.1,AT1G07700.2,AT1G07700.3,AT1G07700.4	1:2379594-2381390	COI0	38600	OK	82.3628	78.7263	-0.065148	-0.230266	0.81745	0.998514	no
AT1G07705.1,AT1G07705.2	1:2381554-2386157	COI0	38600	OK	14.7104	16.6516	0.178818	0.599515	0.5388	0.998514	no
AT1G07728.1,AT1G07728.2	1:2394800-2397399	COI0	38600	OK	8.50282	8.68995	0.0314077	0.0945355	0.9206	0.998514	no
AT1G07747.1	1:2403557-2403845	COI0	38600	NOTEST	0	0	0	0	1	1	no
AT1G07790.1	1:2412937-2413790	COI0	38600	OK	63.4414	78.7044	0.311019	1.22137	0.26855	0.998514	no
AT1G07795.1	1:2414142-2414967	COI0	38600	NOTEST	0.457666	0.26645	-0.780431	0	1	1	no
AT1G07810.1	1:2416177-2420829	COI0	38600	OK	21.8109	23.3792	0.100178	0.397858	0.7109	0.998514	no
AT1G07830.1	1:2422125-2423803	COI0	38600	OK	25.315	18.5962	-0.444989	-1.84418	0.19985	0.998514	no
AT1G07840.1,AT1G07840.2,AT1G07840.3,AT1G07850.1	1:2424044-2432091	COI0	38600	OK	30.0809	34.2366	0.186691	0.513739	0.57645	0.998514	no
AT1G07890.1,AT1G07890.2,AT1G07890.3,AT1G07890.4,AT1G07890.5,AT1G07890.6,AT1G07890.7,AT1G07890.8	1:2437280-2439665	COI0	38600	OK	712.234	1193.94	0.745304	1.83404	0.0627	0.849017	no
AT1G07900.1	1:2442569-2443746	COI0	38600	OK	1.83055	3.35008	0.87192	1.66632	0.3111	0.998514	no
AT1G07902.1	1:2443917-2445140	COI0	38600	OK	1.29041	0.346236	-1.898	-0.927249	0.24905	0.998514	no
AT1G07910.1,AT1G07910.2	1:2445436-2454645	COI0	38600	OK	6.74567	6.44368	-0.066077	-0.212932	0.8216	0.998514	no
AT1G07920.1	1:2454770-2457321	COI0	38600	OK	180.416	175.192	-0.0423926	-0.134482	0.88785	0.998514	no
AT1G07930.1,AT1G07930.2	1:2458183-2460817	COI0	38600	OK	287.792	316.826	0.138662	0.404392	0.6796	0.998514	no
AT1G07960.1,AT1G07960.2,AT1G07960.3,AT1G07960.4	1:2465728-2472806	COI0	38600	OK	64.9999	60.6267	-0.100484	-0.41919	0.79165	0.998514	no
AT1G07985.1	1:2475225-2476167	COI0	38600	OK	1.56844	5.75665	1.8759	3.54377	0.0181	0.516807	no
AT1G07990.1,AT1G07990.2	1:2476952-2483196	COI0	38600	OK	25.8438	26.4719	0.0346423	0.123052	0.8996	0.998514	no
AT1G08005.1	1:2483239-2485726	COI0	38600	NOTEST	0.31229	0	#NAME?	0	1	1	no
AT1G08035.1,AT1G08035.2,AT1G08035.3	1:2494401-2501581	COI0	38600	NOTEST	0.186905	0	#NAME?	0	1	1	no
AT1G08090.1	1:2524022-2526322	COI0	38600	NOTEST	0	0	0	0	1	1	no
AT1G08110.1,AT1G08110.2,AT1G08110.3,AT1G08110.4	1:2535250-2537932	COI0	38600	OK	142.445	172.299	0.274503	0.965901	0.3276	0.998514	no
AT1G08120.1	1:2538614-2542362	COI0	38600	NOTEST	0	0	0	0	1	1	no
AT1G08190.1	1:2567419-2573448	COI0	38600	OK	43.4016	51.4467	0.245332	0.822413	0.3954	0.998514	no
AT1G08240.1	1:2588524-2588596	COI0	38600	NOTEST	0	0	0	0	1	1	no
AT1G08260.1,AT1G08260.2	1:2588775-2607507	COI0	38600	OK	5.50537	5.95168	0.112459	0.418894	0.692	0.998514	no
AT1G08280.1	1:2607876-2609971	COI0	38600	OK	7.44388	6.61207	-0.170952	-0.622054	0.6643	0.998514	no
AT1G08300.1,AT1G08300.2,AT1G08300.3,AT1G08310.1,AT1G08310.2,AT1G08310.3	1:2614773-2621546	COI0	38600	OK	27.47	23.775	-0.208415	-0.758184	0.503	0.998514	no
AT1G04653.1	1:2629835-2630042	COI0	38600	NOTEST	0	0	0	0	1	1	no
AT1G08340.1	1:2630890-2635866	COI0	38600	OK	2.33956	1.56692	-0.578304	-0.773198	0.46835	0.998514	no
AT1G08360.1,AT1G08370.1	1:2635938-2640663	COI0	38600	OK	236.448	232.955	-0.0214722	-0.084604	0.9432	0.998514	no
AT1G08390.1,AT1G08390.2	1:2642071-2646048	COI0	38600	OK	8.16748	7.13107	-0.195771	-0.451567	0.77815	0.998514	no
AT1G08410.1,AT1G08420.1,AT1G08420.2	1:2646143-2657120	COI0	38600	OK	19.1768	25.8612	0.431426	1.51176	0.12025	0.998514	no
AT1G08430.1	1:2658601-2661310	COI0	38600	OK	3.67099	2.08031	-0.819372	-1.92399	0.12515	0.998514	no
AT1G08440.1	1:2662966-2665584	COI0	38600	NOTEST	0.311198	0.103799	-1.58404	0	1	1	no
AT1G08460.1,AT1G08460.2	1:2672197-2674721	COI0	38600	OK	20.5014	16.2805	-0.332579	-1.08267	0.26035	0.998514	no
AT1G08465.1	1:2675812-2679824	COI0	38600	OK	14.8495	12.254	-0.277163	-0.936827	0.45345	0.998514	no
AT1G08480.1	1:2684175-2688658	COI0	38600	OK	71.8929	64.7985	-0.149889	-0.480407	0.72225	0.998514	no
AT1G08500.1	1:2688879-2690250	COI0	38600	OK	3.40226	5.9727	0.811889	2.43034	0.1611	0.998514	no
AT1G08520.1,AT1G08530.1,AT1G08530.2,AT1G08530.3	1:2696380-2703162	COI0	38600	OK	62.8197	87.8183	0.483305	1.52207	0.10145	0.980785	no
AT1G08540.1,AT1G08550.1,AT1G08550.2,AT1G08550.3	1:2703294-2711000	COI0	38600	OK	63.1789	93.6426	0.567723	1.9827	0.0654	0.859293	no
AT1G08570.1,AT1G08570.2,AT1G08570.3,AT1G08570.4	1:2712693-2714833	COI0	38600	OK	110.502	198.031	0.841654	2.89132	0.0034	0.197415	no
AT1G08590.1	1:2718537-2722280	COI0	38600	NOTEST	0.108038	0	#NAME?	0	1	1	no
AT1G08600.1,AT1G08600.2,AT1G08600.3,AT1G08600.4	1:2723676-2735819	COI0	38600	OK	14.9618	17.5102	0.226906	0.736101	0.4532	0.998514	no
AT1G08620.1,AT1G08620.2,AT1G08620.3,AT1G08620.4	1:2736597-2747967	COI0	38600	OK	11.8879	11.976	0.0106423	0.032252	0.97555	0.998514	no
AT1G08650.1,AT1G08650.2	1:2751812-2753809	COI0	38600	OK	43.4926	24.3733	-0.835466	-2.90862	0.00375	0.209672	no
AT1G08680.1,AT1G08680.2,AT1G08680.3,AT1G08680.4,AT1G08680.5	1:2762583-2769508	COI0	38600	OK	19.7958	28.5296	0.527269	1.87914	0.0528	0.803685	no
AT1G08710.1,AT1G08710.2	1:2771619-2773531	COI0	38600	OK	15.695	10.9774	-0.515772	-1.45764	0.14435	0.998514	no
AT1G08720.1,AT1G08720.2	1:2773940-2779308	COI0	38600	OK	10.7549	11.7218	0.124193	0.417007	0.66405	0.998514	no
AT1G08730.1,AT1G08730.2	1:2779437-2788477	COI0	38600	OK	0.773195	0.253866	-1.60676	-2.25306	0.031	0.647115	no
AT1G08750.1,AT1G08750.2,AT1G08750.3	1:2801041-2804711	COI0	38600	OK	11.1744	11.659	0.0612426	0.163519	0.86605	0.998514	no
AT1G08760.1	1:2805043-2808623	COI0	38600	OK	12.4656	11.5033	-0.115907	-0.385518	0.69165	0.998514	no
AT1G08770.1	1:2808759-2809775	COI0	38600	OK	20.9117	23.8318	0.188573	0.774546	0.58635	0.998514	no
AT1G08790.1	1:2811988-2812782	COI0	38600	NOTEST	0.118326	0	#NAME?	0	1	1	no
AT1G04667.1	1:2825587-2825978	COI0	38600	NOTEST	0	0	0	0	1	1	no
AT1G08830.1,AT1G08830.2	1:2827059-2841134	COI0	38600	OK	44.7499	81.3819	0.862825	3.12129	0.011	0.390613	no
AT1G08845.1,AT1G08845.2,AT1G08845.3	1:2827059-2841134	COI0	38600	OK	10.8952	9.9168	-0.13575	-0.17326	0.86045	0.998514	no
AT1G08860.1	1:2841968-2846350	COI0	38600	NOTEST	0.772755	0.447709	-0.787451	0	1	1	no
AT1G08890.1	1:2848148-2852270	COI0	38600	OK	1.97249	3.00871	0.60913	1.59702	0.32	0.998514	no
AT1G08900.1,AT1G08900.2,AT1G08900.3,AT1G08900.4,AT1G08900.5	1:2852362-2855941	COI0	38600	OK	14.8494	20.8327	0.488444	1.43302	0.14435	0.998514	no
AT1G08910.1	1:2856161-2861170	COI0	38600	OK	11.2185	13.2789	0.24325	0.68948	0.40375	0.998514	no
AT1G08920.1,AT1G08920.2,AT1G08920.3	1:2867202-2870745	COI0	38600	OK	17.4067	25.0644	0.525995	1.68099	0.08695	0.936394	no
AT1G08930.1,AT1G08930.2	1:2873299-2877270	COI0	38600	OK	46.1131	45.7929	-0.0100541	-0.035529	0.97125	0.998514	no
AT1G08940.1	1:2877429-2879169	COI0	38600	OK	6.77292	4.78914	-0.500012	-1.04338	0.25965	0.998514	no
AT1G08950.1	1:2879302-2879374	COI0	38600	NOTEST	0	0	0	0	1	1	no
AT1G08960.1	1:2879505-2882234	COI0	38600	OK	7.05046	8.95178	0.344457	1.35991	0.36865	0.998514	no
AT1G08970.1,AT1G08970.2,AT1G08970.3,AT1G08970.4,AT1G08980.1	1:2882490-2886621	COI0	38600	OK	67.1543	71.0604	0.0815653	0.2735	0.7618	0.998514	no
AT1G08985.1	1:2887244-2887706	COI0	38600	NOTEST	0.325524	0	#NAME?	0	1	1	no
AT1G08990.1	1:2888426-2890965	COI0	38600	OK	0.741176	0.487602	-0.604112	-0.73699	0.44	0.998514	no
AT1G09000.1,AT1G09000.2	1:2891018-2899446	COI0	38600	OK	1.65616	2.01158	0.280484	0.219913	0.84595	0.998514	no
AT1G09040.1	1:2911249-2915406	COI0	38600	OK	3.46656	3.88766	0.165397	0.454728	0.6664	0.998514	no
AT1G09050.1,AT1G09050.2	1:2916967-2925826	COI0	38600	OK	3.05042	3.8686	0.342804	0.432878	0.68275	0.998514	no
AT1G09070.1	1:2927501-2929107	COI0	38600	OK	67.886	63.6367	-0.0932545	-0.311451	0.73365	0.998514	no
AT1G09090.1,AT1G09090.2	1:2932738-2939363	COI0	38600	NOTEST	0.224141	0.16505	-0.441505	0	1	1	no
AT1G09110.1	1:2939416-2939488	COI0	38600	NOTEST	0	0	0	0	1	1	no
AT1G09150.1	1:2946029-2949159	COI0	38600	OK	47.1819	42.6995	-0.144015	-0.528115	0.6046	0.998514	no
AT1G09176.1	1:2964014-2964727	COI0	38600	NOTEST	0.460689	0.630672	0.453098	0	1	1	no
AT1G09180.1	1:2965022-2965972	COI0	38600	OK	3.794	4.63954	0.290265	0.64709	0.669	0.998514	no
AT1G09240.1	1:2984828-2986231	COI0	38600	OK	63.2306	30.7395	-1.04053	-5.36733	0.0007	0.0693825	no
AT1G04693.1	1:2987675-2988104	COI0	38600	NOTEST	0	0	0	0	1	1	no
AT1G09250.1	1:2989140-2990427	COI0	38600	OK	26.0572	25.4953	-0.0314525	-0.101082	0.9183	0.998514	no
AT1G09260.1	1:2993380-2993820	COI0	38600	NOTEST	0.589463	0	#NAME?	0	1	1	no
AT1G09270.1,AT1G09270.2,AT1G09270.3	1:2994330-3001362	COI0	38600	OK	33.2243	33.4268	0.00876642	0.0277653	0.97785	0.998514	no
AT1G09300.1,AT1G09300.2	1:3001438-3008381	COI0	38600	OK	10.0599	10.9504	0.122368	0.315001	0.74315	0.998514	no
AT1G09310.1	1:3008909-3012407	COI0	38600	OK	763.51	1171.51	0.61765	1.55652	0.1182	0.998514	no
AT1G09340.1,AT1G09340.2	1:3012738-3018542	COI0	38600	OK	296.413	476.387	0.684526	1.81016	0.06685	0.866548	no
AT1G09350.1,AT1G09350.2	1:3019638-3021443	COI0	38600	NOTEST	0.22642	0.0538097	-2.07306	0	1	1	no
AT1G09360.1	1:3021801-3022368	COI0	38600	NOTEST	0	0	0	0	1	1	no
AT1G09370.1	1:3024876-3025539	COI0	38600	NOTEST	0	0	0	0	1	1	no
AT1G09390.1	1:3031045-3035396	COI0	38600	OK	11.7306	9.35221	-0.326897	-0.993332	0.3725	0.998514	no
AT1G09410.1	1:3035399-3037687	COI0	38600	OK	1.26755	0.929036	-0.448235	-0.79386	0.509	0.998514	no
AT1G09421.1	1:3038461-3041873	COI0	38600	OK	1.01252	0.897973	-0.1732	-0.0563007	0.836	0.998514	no
AT1G09430.1	1:3041995-3048006	COI0	38600	OK	51.448	41.2423	-0.318993	-1.36028	0.2781	0.998514	no
AT1G09450.1	1:3048965-3053163	COI0	38600	OK	2.14282	2.22997	0.0575154	0.115203	0.9062	0.998514	no
AT1G09460.1	1:3053697-3057543	COI0	38600	OK	7.28931	6.62233	-0.138443	-0.287764	0.74415	0.998514	no
AT1G09480.1,AT1G09480.2	1:3057974-3060757	COI0	38600	OK	6.55009	6.84256	0.0630212	0.134817	0.89055	0.998514	no
AT1G09490.1,AT1G09490.2	1:3063935-3065949	COI0	38600	OK	27.0338	38.7619	0.519877	1.72576	0.0787	0.911397	no
AT1G09500.1,AT1G09500.2,AT1G09500.3	1:3066673-3068796	COI0	38600	OK	21.0594	20.445	-0.0427197	-0.122108	0.8984	0.998514	no
AT1G09510.1	1:3069356-3070910	COI0	38600	NOTEST	0.172437	0	#NAME?	0	1	1	no
AT1G09530.1,AT1G09530.2,AT1G09530.3,AT1G09530.4,AT1G09530.5,AT1G09530.6	1:3075767-3079654	COI0	38600	OK	36.9682	34.2318	-0.110949	-0.389842	0.68615	0.998514	no
AT1G04703.1	1:3083819-3084222	COI0	38600	NOTEST	0	0	0	0	1	1	no
AT1G09540.1	1:3086100-3087914	COI0	38600	OK	1.93539	1.48643	-0.38077	-0.604822	0.53455	0.998514	no
AT1G09560.1	1:3093643-3094954	COI0	38600	OK	103.769	107.535	0.05142	0.230844	0.8524	0.998514	no
AT1G09580.1,AT1G09590.1	1:3104491-3107801	COI0	38600	OK	224.505	251.537	0.164019	0.571161	0.5601	0.998514	no
AT1G09600.1	1:3107895-3111552	COI0	38600	OK	0.942661	0.41196	-1.19423	-1.7327	0.10395	0.984737	no
AT1G09610.1	1:3111693-3116699	COI0	38600	NOTEST	0	0	0	0	1	1	no
AT1G09640.1,AT1G09640.2	1:3118154-3122542	COI0	38600	OK	199.997	206.114	0.0434615	0.134749	0.88985	0.998514	no
AT1G09645.1	1:3122925-3124667	COI0	38600	OK	48.5545	39.6376	-0.292735	-1.4944	0.3596	0.998514	no
AT1G09650.1	1:3125174-3127284	COI0	38600	NOTEST	0.589317	0.346424	-0.766506	0	1	1	no
AT1G09665.1	1:3133007-3133674	COI0	38600	NOTEST	0	0	0	0	1	1	no
AT1G09710.1,AT1G09710.2,AT1G09710.3,AT1G09710.4,AT1G09710.5	1:3140861-3144381	COI0	38600	OK	6.48087	7.23848	0.1595	0.446295	0.64665	0.998514	no
AT1G09740.1,AT1G09740.2	1:3147636-3156376	COI0	38600	OK	15.4485	17.7433	0.19981	0.310399	0.7521	0.998514	no
AT1G09750.1	1:3157500-3161692	COI0	38600	OK	41.255	41.5182	0.00917219	0.0208576	0.97985	0.998514	no
AT1G09770.1	1:3161831-3167924	COI0	38600	OK	45.0934	44.0764	-0.0329107	-0.0791717	0.92775	0.998514	no
AT1G09794.1,AT1G09795.1	1:3171904-3180736	COI0	38600	OK	35.9188	39.1282	0.12347	0.428062	0.6789	0.998514	no
AT1G09812.1	1:3187441-3188854	COI0	38600	OK	5.26348	4.62262	-0.187306	-0.432905	0.7186	0.998514	no
AT1G09815.1	1:3189300-3190242	COI0	38600	OK	26.0979	24.171	-0.110656	-0.373624	0.7536	0.998514	no
AT1G09850.1	1:3201684-3205411	COI0	38600	OK	19.121	35.7616	0.903257	3.83972	0.00285	0.178128	no
AT1G04743.1	1:3201684-3205411	COI0	38600	NOTEST	0.205255	0.339943	0.727875	0	1	1	no
AT1G09870.1	1:3205578-3213468	COI0	38600	OK	23.9343	21.9532	-0.124646	-0.473145	0.6852	0.998514	no
AT1G04747.1	1:3205578-3213468	COI0	38600	NOTEST	0	0	0	0	1	1	no
AT1G09900.1	1:3218132-3219929	COI0	38600	OK	26.2568	36.0857	0.458735	2.31946	0.12015	0.998514	no
AT1G09960.1	1:3243985-3247216	COI0	38600	OK	5.42261	5.08661	-0.0922831	-0.278946	0.8191	0.998514	no
AT1G09970.1,AT1G09970.2	1:3252097-3255782	COI0	38600	OK	82.7222	76.8188	-0.106815	-0.352615	0.7205	0.998514	no
AT1G10010.2	1:3265885-3268823	COI0	38600	NOTEST	0	0.0727333	inf	0	1	1	no
AT1G10030.1	1:3273752-3278779	COI0	38600	OK	10.7446	12.0108	0.160725	0.530653	0.7553	0.998514	no
AT1G10050.1,AT1G10050.2,AT1G10050.3	1:3278791-3283631	COI0	38600	OK	5.20184	5.15884	-0.011975	-0.0344179	0.97055	0.998514	no
AT1G10060.1,AT1G10060.3,AT1G10060.4,AT1G10060.5,AT1G10060.6	1:3284072-3287292	COI0	38600	OK	15.9785	15.5509	-0.0391308	-0.124049	0.8999	0.998514	no
AT1G10070.1,AT1G10070.2,AT1G10070.3	1:3288086-3296198	COI0	38600	OK	9.53435	10.6767	0.163263	0.43262	0.6983	0.998514	no
AT1G10110.1	1:3302563-3303938	COI0	38600	NOTEST	0.118694	0	#NAME?	0	1	1	no
AT1G04773.1	1:3304038-3306956	COI0	38600	OK	0.624936	0.729768	0.223728	0.068918	0.83405	0.998514	no
AT1G10130.1	1:3310929-3322269	COI0	38600	OK	24.7009	24.8209	0.00698713	0.0341234	0.98145	0.998514	no
AT1G10150.1	1:3325798-3328448	COI0	38600	NOTEST	0	0	0	0	1	1	no
AT1G10210.1,AT1G10210.2,AT1G10210.3	1:3349081-3351180	COI0	38600	OK	11.7717	8.02547	-0.552664	-1.42981	0.14645	0.998514	no
AT1G10220.1,AT1G10220.2	1:3351922-3353122	COI0	38600	NOTEST	0.505462	0.411479	-0.296784	0	1	1	no
AT1G10225.1	1:3354242-3354856	COI0	38600	NOTEST	0.459214	0.289775	-0.664237	0	1	1	no
AT1G10230.1	1:3355674-3356151	COI0	38600	OK	37.8111	26.6476	-0.504804	-2.3433	0.2518	0.998514	no
AT1G10270.1	1:3363431-3369125	COI0	38600	OK	6.52897	7.48027	0.196234	0.487155	0.5554	0.998514	no
AT1G10290.1	1:3370401-3377463	COI0	38600	OK	27.621	31.4806	0.188695	0.605454	0.4966	0.998514	no
AT1G10300.1,AT1G10300.2,AT1G10300.3	1:3377877-3380414	COI0	38600	OK	0.832104	0.785784	-0.0826299	-0.0986959	0.9144	0.998514	no
AT1G10330.1	1:3388598-3390150	COI0	38600	OK	1.32418	0.842148	-0.652954	-1.26915	0.45875	0.998514	no
AT1G10380.1,AT1G10380.2	1:3400553-3402420	COI0	38600	OK	19.4576	20.842	0.099164	0.309583	0.74695	0.998514	no
AT1G10385.1	1:3403131-3405920	COI0	38600	NOTEST	0.400107	0.0358114	-3.48189	0	1	1	no
AT1G04787.1	1:3406208-3406622	COI0	38600	NOTEST	0	0	0	0	1	1	no
AT1G10395.1	1:3406955-3412874	COI0	38600	OK	0	3.09862	inf	#NAME?	0.1561	0.998514	no
AT1G04793.1	1:3422719-3423058	COI0	38600	NOTEST	0	0	0	0	1	1	no
AT1G10450.1,AT1G10450.2,AT1G10450.3	1:3431763-3438370	COI0	38600	OK	16.1183	19.8292	0.298924	1.05437	0.28665	0.998514	no
AT1G10455.1	1:3438554-3439013	COI0	38600	NOTEST	0	0	0	0	1	1	no
AT1G10480.1	1:3449566-3451226	COI0	38600	OK	1.90535	1.56542	-0.283501	-0.623618	0.6904	0.998514	no
AT1G10490.1,AT1G10490.2	1:3453190-3461485	COI0	38600	OK	18.892	21.8675	0.211018	0.686239	0.59195	0.998514	no
AT1G10510.1	1:3461634-3465786	COI0	38600	OK	38.5279	53.7435	0.480187	2.0763	0.09305	0.956427	no
AT1G10520.1,AT1G10520.2	1:3465925-3469455	COI0	38600	OK	1.81538	1.49614	-0.279028	-0.460439	0.6459	0.998514	no
AT1G10522.1,AT1G10522.2	1:3469511-3472674	COI0	38600	OK	24.23	38.3684	0.663124	2.70278	0.03895	0.709097	no
AT1G04803.1	1:3469511-3472674	COI0	38600	NOTEST	0.652287	0	#NAME?	0	1	1	no
AT1G10560.1	1:3484398-3486965	COI0	38600	NOTEST	0.298439	0.236664	-0.334595	0	1	1	no
AT1G10570.1,AT1G10570.2,AT1G10570.3	1:3487385-3495244	COI0	38600	OK	18.1279	16.7276	-0.115982	-0.277928	0.81725	0.998514	no
AT1G10588.1,AT1G10588.2	1:3501144-3501904	COI0	38600	NOTEST	0	0	0	0	1	1	no
AT1G10600.1,AT1G10600.2,AT1G10600.3,AT1G10600.4,AT1G10610.1,AT1G10610.2,AT1G10610.3	1:3503639-3512321	COI0	38600	OK	32.524	29.9919	-0.116929	-0.507459	0.718	0.998514	no
AT1G04807.1	1:3512738-3518035	COI0	38600	NOTEST	0	0	0	0	1	1	no
AT1G10657.1,AT1G10657.2,AT1G10657.3,AT1G10657.4	1:3530352-3532017	COI0	38600	OK	32.7734	22.1187	-0.567261	-1.68623	0.0893	0.942944	no
AT1G10660.1,AT1G10660.2,AT1G10660.3,AT1G10660.4	1:3532228-3535137	COI0	38600	OK	32.295	33.2731	0.0430449	0.149066	0.88065	0.998514	no
AT1G10670.1,AT1G10670.2,AT1G10670.3,AT1G10670.4	1:3535287-3543925	COI0	38600	OK	136.075	139.235	0.0331136	0.132166	0.9055	0.998514	no
AT1G10700.1,AT1G10700.2	1:3554103-3556544	COI0	38600	OK	14.6268	16.9281	0.210802	0.628207	0.52465	0.998514	no
AT1G10710.1,AT1G10710.2	1:3558357-3560705	COI0	38600	OK	0.703561	0.0876142	-3.00544	-1.37155	0.1	0.977698	no
AT1G10715.1	1:3561148-3561495	COI0	38600	NOTEST	0	0	0	0	1	1	no
AT1G10717.1	1:3562179-3562554	COI0	38600	NOTEST	0	0	0	0	1	1	no
AT1G10720.1	1:3562840-3564850	COI0	38600	OK	12.5705	11.4795	-0.130986	-0.500229	0.6997	0.998514	no
AT1G10730.1	1:3565256-3571053	COI0	38600	OK	10.4355	9.27883	-0.169485	-0.23966	0.8338	0.998514	no
AT1G10745.1	1:3572673-3573173	COI0	38600	NOTEST	0	0	0	0	1	1	no
AT1G10747.1	1:3574311-3578783	COI0	38600	NOTEST	0.318316	0	#NAME?	0	1	1	no
AT1G04817.1	1:3574311-3578783	COI0	38600	NOTEST	0	0	0	0	1	1	no
AT1G10790.1	1:3596263-3597847	COI0	38600	NOTEST	0.291118	0.874454	1.58678	0	1	1	no
AT1G10810.1,AT1G10810.2,AT1G10810.3	1:3599082-3600877	COI0	38600	NOTEST	0.640739	0.622134	-0.0425109	0	1	1	no
AT1G10850.1	1:3611489-3616308	COI0	38600	OK	15.8331	12.2464	-0.370586	-1.09233	0.26825	0.998514	no
AT1G04827.1	1:3611489-3616308	COI0	38600	NOTEST	0	0.322069	inf	0	1	1	no
AT1G10890.1,AT1G10890.2,AT1G10890.3,AT1G10890.4	1:3627645-3630808	COI0	38600	OK	50.5706	49.9144	-0.0188444	-0.0669227	0.944	0.998514	no
AT1G10910.1,AT1G10910.2	1:3639834-3647784	COI0	38600	OK	31.6759	43.0022	0.441025	1.69021	0.16035	0.998514	no
AT1G10950.1,AT1G10960.1	1:3659203-3665040	COI0	38600	OK	546.258	738.347	0.434715	1.20943	0.22185	0.998514	no
AT1G11020.1	1:3676606-3678567	COI0	38600	OK	17.7623	14.8517	-0.258186	-0.686743	0.4681	0.998514	no
AT1G11050.1	1:3681678-3684169	COI0	38600	NOTEST	0.0657474	0	#NAME?	0	1	1	no
AT1G11060.1	1:3684567-3689892	COI0	38600	OK	9.11509	9.94196	0.125273	0.454568	0.6882	0.998514	no
AT1G11090.1	1:3702553-3709586	COI0	38600	OK	14.5452	12.6985	-0.195892	-0.65301	0.6386	0.998514	no
AT1G11110.1,AT1G11110.2,AT1G11110.3	1:3710207-3712503	COI0	38600	NOTEST	0.199578	0	#NAME?	0	1	1	no
AT1G11120.1,AT1G11120.2	1:3715083-3717659	COI0	38600	OK	11.1775	6.3544	-0.81477	-1.68206	0.09085	0.948216	no
AT1G11125.1	1:3718651-3719832	COI0	38600	OK	2.51472	1.25546	-1.00218	-1.40325	0.138	0.998514	no
AT1G11130.1,AT1G11130.2	1:3722707-3727450	COI0	38600	OK	12.3957	14.1347	0.189399	0.644019	0.51635	0.998514	no
AT1G11160.1,AT1G11160.2,AT1G11160.3,AT1G11160.4	1:3733043-3739844	COI0	38600	OK	1.08407	1.05219	-0.0430574	-0.0804969	0.94	0.998514	no
AT1G11170.1,AT1G11170.2,AT1G11170.3,AT1G11170.4,AT1G11170.5,AT1G11170.6,AT1G11170.7,AT1G11170.8,AT1G11170.9	1:3740663-3744675	COI0	38600	OK	2.77221	3.271	0.238697	0.453407	0.633	0.998514	no
AT1G11175.1	1:3744857-3745655	COI0	38600	OK	19.0929	17.9272	-0.0908852	-0.383408	0.82565	0.998514	no
AT1G11180.1,AT1G11180.2,AT1G11180.3	1:3745773-3748557	COI0	38600	OK	8.40617	10.8712	0.370991	0.866554	0.37315	0.998514	no
AT1G11185.1	1:3749509-3750035	COI0	38600	OK	5.58479	3.27903	-0.768234	-1.72838	0.35705	0.998514	no
AT1G11200.1	1:3753212-3755658	COI0	38600	OK	14.6745	9.34906	-0.650417	-2.63551	0.11205	0.998514	no
AT1G11250.1	1:3766753-3770102	COI0	38600	NOTEST	0.150507	0.0592434	-1.34511	0	1	1	no
AT1G11260.1	1:3777235-3787099	COI0	38600	OK	39.4435	90.5017	1.19816	4.59302	5e-05	0.00838689	yes
AT1G11300.1,AT1G11300.2	1:3794242-3797507	COI0	38600	OK	1.814	1.87898	0.0507757	0.0940155	0.92175	0.998514	no
AT1G11303.1	1:3797666-3804233	COI0	38600	OK	2.22957	2.56756	0.203632	0.179102	0.869	0.998514	no
AT1G11320.1	1:3806821-3808940	COI0	38600	OK	3.68329	3.25251	-0.179442	-0.427743	0.7048	0.998514	no
AT1G11330.1,AT1G11330.2,AT1G11330.3	1:3809794-3813809	COI0	38600	OK	15.326	11.9998	-0.352976	-1.15979	0.24375	0.998514	no
AT1G11380.1	1:3832562-3837676	COI0	38600	OK	9.11681	14.7547	0.694576	1.82537	0.17945	0.998514	no
AT1G11400.1,AT1G11400.2,AT1G11400.3,AT1G11400.4,AT1G11400.5,AT1G11400.6,AT1G11410.1,AT1G11410.2,AT1G11410.3,AT1G11410.4	1:3837693-3846956	COI0	38600	OK	45.223	42.5982	-0.0862647	-0.303686	0.7762	0.998514	no
AT1G11430.1,AT1G11440.1	1:3847219-3850735	COI0	38600	OK	97.8777	134.039	0.453604	1.86349	0.1044	0.98551	no
AT1G11450.1,AT1G11450.3,AT1G11450.4	1:3853183-3855507	COI0	38600	OK	5.9368	8.69314	0.550192	1.19587	0.2188	0.998514	no
AT1G11460.1	1:3856941-3859465	COI0	38600	NOTEST	0.155334	0.620777	1.9987	0	1	1	no
AT1G11475.1	1:3862398-3867000	COI0	38600	OK	78.7464	65.3463	-0.269107	-0.794102	0.63825	0.998514	no
AT1G11500.2,AT1G11500.3	1:3870678-3871702	COI0	38600	OK	0.769676	0.285217	-1.43219	-0.707262	0.31365	0.998514	no
AT1G11520.1	1:3873028-3873619	COI0	38600	NOTEST	0	0	0	0	1	1	no
AT1G11530.1	1:3874395-3877323	COI0	38600	OK	26.6465	23.7711	-0.164736	-0.786628	0.6969	0.998514	no
AT1G11550.1	1:3881528-3881608	COI0	38600	NOTEST	0	0	0	0	1	1	no
AT1G11560.1	1:3881626-3882819	COI0	38600	NOTEST	0.122961	0.209208	0.766743	0	1	1	no
AT1G11570.3,AT1G11570.4	1:3883166-3884129	COI0	38600	OK	2.18279	1.31428	-0.731907	-0.64715	0.4413	0.998514	no
AT1G11572.1	1:3884341-3884960	COI0	38600	NOTEST	0.187132	0.231763	0.308594	0	1	1	no
AT1G11580.2	1:3888609-3890824	COI0	38600	OK	49.8821	30.3863	-0.715101	-2.52646	0.01035	0.378019	no
AT1G11590.1	1:3892579-3894677	COI0	38600	NOTEST	0	0	0	0	1	1	no
AT1G11591.1	1:3895129-3896934	COI0	38600	NOTEST	0	0	0	0	1	1	no
AT1G11593.1	1:3898001-3898609	COI0	38600	NOTEST	0	0	0	0	1	1	no
AT1G11600.1	1:3901949-3903895	COI0	38600	OK	10.5637	7.28563	-0.535994	-1.46119	0.1129	0.998514	no
AT1G11608.1	1:3905578-3906818	COI0	38600	NOTEST	0	0	0	0	1	1	no
AT1G11620.1	1:3910832-3911924	COI0	38600	NOTEST	0.125167	0	#NAME?	0	1	1	no
AT1G11650.1,AT1G11650.2	1:3914773-3918243	COI0	38600	OK	134.176	137.438	0.0346536	0.116987	0.9011	0.998514	no
AT1G11655.1	1:3919236-3919869	COI0	38600	NOTEST	0	0	0	0	1	1	no
AT1G11660.1,AT1G11660.2,AT1G11660.3,AT1G11660.4	1:3920477-3924566	COI0	38600	OK	20.4456	23.7284	0.214826	0.741154	0.44885	0.998514	no
AT1G11680.1	1:3938421-3940871	COI0	38600	OK	52.8018	58.2381	0.141377	0.593094	0.6094	0.998514	no
AT1G11690.1	1:3941468-3942212	COI0	38600	NOTEST	0.107443	0.13648	0.345119	0	1	1	no
AT1G04867.1	1:3943178-3943430	COI0	38600	NOTEST	0	0	0	0	1	1	no
AT1G11700.1	1:3945583-3946757	COI0	38600	OK	30.3901	14.5604	-1.06155	-3.13653	0.0014	0.11496	no
AT1G11710.1,AT1G11710.2,AT1G11720.1,AT1G11720.2	1:3948713-3957044	COI0	38600	OK	28.6707	38.1162	0.410831	1.5781	0.14295	0.998514	no
AT1G11730.1	1:3957283-3960464	COI0	38600	OK	1.9869	2.09251	0.0747175	0.165588	0.9089	0.998514	no
AT1G04877.1	1:3960943-3961245	COI0	38600	NOTEST	2.11192	0	#NAME?	0	1	1	no
AT1G11750.1,AT1G11750.2	1:3967475-3971911	COI0	38600	OK	81.5488	103.251	0.340419	1.18429	0.2493	0.998514	no
AT1G11765.1	1:3973873-3974594	COI0	38600	OK	1.3769	0	#NAME?	#NAME?	0.00155	0.121515	no
AT1G11770.1	1:3975606-3979237	COI0	38600	NOTEST	0.0696435	0	#NAME?	0	1	1	no
AT1G11790.1,AT1G11790.2	1:3981152-3987290	COI0	38600	OK	19.2869	32.3021	0.74401	3.33752	0.03565	0.685477	no
AT1G11810.1	1:3989762-3993707	COI0	38600	NOTEST	0	0.0830868	inf	0	1	1	no
AT1G04893.1	1:3989762-3993707	COI0	38600	NOTEST	0	0	0	0	1	1	no
AT1G11840.1,AT1G11840.2,AT1G11840.3,AT1G11840.4,AT1G11840.5,AT1G11840.6	1:3995157-3997965	COI0	38600	OK	219.519	311.965	0.507038	1.64876	0.094	0.959004	no
AT1G11850.1,AT1G11850.2,AT1G11850.3,AT1G11850.4	1:3999156-4000024	COI0	38600	OK	86.3404	97.2433	0.171563	0.564148	0.5632	0.998514	no
AT1G11860.1,AT1G11860.2,AT1G11860.3,AT1G11870.1,AT1G11870.2,AT1G11870.3,AT1G11870.4,AT1G11870.5,AT1G11870.6	1:4001112-4007020	COI0	38600	OK	451.515	608.636	0.430806	1.19081	0.2638	0.998514	no
AT1G11890.1	1:4010756-4014688	COI0	38600	OK	39.0296	41.5212	0.0892795	0.390095	0.7644	0.998514	no
AT1G11905.1,AT1G11905.2	1:4014781-4016544	COI0	38600	OK	12.2858	13.6297	0.149761	0.369314	0.7132	0.998514	no
AT1G11915.1	1:4021749-4023292	COI0	38600	OK	1.41834	1.35866	-0.0620276	-0.106254	0.94665	0.998514	no
AT1G11930.1,AT1G11930.2	1:4028594-4030656	COI0	38600	OK	50.9227	47.5509	-0.0988344	-0.34862	0.7262	0.998514	no
AT1G11970.1	1:4044369-4044669	COI0	38600	NOTEST	0	0	0	0	1	1	no
AT1G11980.1	1:4045618-4045855	COI0	38600	NOTEST	0	0	0	0	1	1	no
AT1G12010.1	1:4056164-4057968	COI0	38600	OK	5.12104	3.42727	-0.579377	-1.32637	0.24515	0.998514	no
AT1G12013.1	1:4058286-4058416	COI0	38600	NOTEST	0	0	0	0	1	1	no
AT1G12015.1	1:4058486-4058576	COI0	38600	NOTEST	0	0	0	0	1	1	no
AT1G12040.1	1:4069991-4072681	COI0	38600	NOTEST	0.190394	0.0746019	-1.35171	0	1	1	no
AT1G12050.1,AT1G12060.1	1:4072740-4077230	COI0	38600	OK	32.9759	33.4482	0.0205193	0.0788316	0.94365	0.998514	no
AT1G12080.1,AT1G12080.2	1:4084161-4085185	COI0	38600	OK	124.708	66.5269	-0.906542	-3.19946	0.0011	0.0960884	no
AT1G12100.1	1:4095245-4095883	COI0	38600	OK	1.89262	0.489904	-1.94981	-2.63001	0.25585	0.998514	no
AT1G12110.1	1:4105222-4109601	COI0	38600	OK	140.957	85.3212	-0.724276	-2.56431	0.0165	0.491129	no
AT1G12130.1	1:4118593-4120959	COI0	38600	NOTEST	0	0.0653691	inf	0	1	1	no
AT1G12140.1,AT1G12140.2,AT1G12140.3	1:4121284-4125651	COI0	38600	OK	36.4891	34.3229	-0.0882955	-0.331566	0.75695	0.998514	no
AT1G12160.1	1:4125989-4128310	COI0	38600	OK	2.55617	2.3183	-0.140916	-0.300307	0.80395	0.998514	no
AT1G12180.1	1:4130395-4131168	COI0	38600	NOTEST	0	0	0	0	1	1	no
AT1G12200.1,AT1G12200.2	1:4137510-4140158	COI0	38600	OK	29.0181	17.6398	-0.718118	-2.44138	0.013	0.430962	no
AT1G12210.1,AT1G12210.2,AT1G12210.3	1:4140215-4144114	COI0	38600	NOTEST	0.142826	0.13877	-0.0415571	0	1	1	no
AT1G12220.1,AT1G12220.2,AT1G12220.3,AT1G12230.1,AT1G12230.2	1:4144256-4151056	COI0	38600	OK	83.9249	88.3599	0.0742928	0.260836	0.7947	0.998514	no
AT1G12240.1,AT1G12244.1	1:4153640-4159046	COI0	38600	OK	79.1706	141.929	0.842134	2.54003	0.0052	0.255342	no
AT1G12250.1,AT1G12250.2,AT1G12250.3	1:4159226-4161506	COI0	38600	OK	28.1542	48.5457	0.785993	2.63598	0.0064	0.288962	no
AT1G12270.1	1:4172034-4174730	COI0	38600	OK	33.9357	39.3096	0.212079	0.805406	0.45075	0.998514	no
AT1G12320.1	1:4186623-4190342	COI0	38600	OK	4.78358	2.67081	-0.840812	-1.28316	0.2878	0.998514	no
AT1G04947.1	1:4191470-4191780	COI0	38600	NOTEST	0	0	0	0	1	1	no
AT1G12330.1	1:4194419-4196749	COI0	38600	OK	24.6249	16.7291	-0.557753	-1.77522	0.05965	0.838175	no
AT1G12340.1,AT1G12350.1,AT1G12350.2,AT1G12360.1	1:4197395-4208999	COI0	38600	OK	41.6315	44.7585	0.104487	0.396097	0.74265	0.998514	no
AT1G12390.1,AT1G12400.1,AT1G12400.2,AT1G12400.3	1:4220043-4222875	COI0	38600	OK	28.8616	24.8072	-0.218392	-0.723746	0.47365	0.998514	no
AT1G12410.1	1:4223029-4225254	COI0	38600	OK	110.297	129.466	0.231173	0.981779	0.3991	0.998514	no
AT1G12450.1	1:4243903-4245993	COI0	38600	OK	5.34053	6.50141	0.283769	0.969289	0.53945	0.998514	no
AT1G12460.1,AT1G12460.2	1:4247217-4250758	COI0	38600	OK	7.29896	6.69826	-0.123904	-0.353423	0.7192	0.998514	no
AT1G12470.1	1:4250944-4259300	COI0	38600	OK	20.9268	22.9813	0.135103	0.492216	0.6439	0.998514	no
AT1G04953.1	1:4250944-4259300	COI0	38600	OK	4.70452	3.20553	-0.553483	-0.297915	0.77785	0.998514	no
AT1G12490.1	1:4260782-4261869	COI0	38600	NOTEST	0.344806	0.257205	-0.422869	0	1	1	no
AT1G04957.1	1:4261917-4262359	COI0	38600	NOTEST	0	0	0	0	1	1	no
AT1G12540.1	1:4272887-4274206	COI0	38600	NOTEST	0	0	0	0	1	1	no
AT1G12550.1	1:4274530-4276031	COI0	38600	OK	7.32653	4.9909	-0.553831	-1.52691	0.2376	0.998514	no
AT1G12560.1	1:4276504-4281131	COI0	38600	NOTEST	0.315695	0.154436	-1.03152	0	1	1	no
AT1G12580.1	1:4282793-4285876	COI0	38600	OK	24.4652	31.8192	0.37917	1.24595	0.181	0.998514	no
AT1G04963.1	1:4289279-4289536	COI0	38600	NOTEST	0	0	0	0	1	1	no
AT1G12630.1	1:4298665-4299571	COI0	38600	NOTEST	0.0778134	0.0949403	0.287002	0	1	1	no
AT1G12650.1,AT1G12650.2,AT1G12650.3,AT1G12650.4	1:4303279-4308007	COI0	38600	OK	39.6731	37.0746	-0.0977268	-0.222773	0.8213	0.998514	no
AT1G12660.1	1:4308942-4309749	COI0	38600	NOTEST	0	0	0	0	1	1	no
AT1G12663.1	1:4310968-4311519	COI0	38600	NOTEST	0	0	0	0	1	1	no
AT1G12665.1	1:4312330-4312935	COI0	38600	NOTEST	0.873268	0.332937	-1.39117	0	1	1	no
AT1G12672.1,AT1G12672.2	1:4318308-4319090	COI0	38600	NOTEST	0	0	0	0	1	1	no
AT1G12730.1,AT1G12730.2	1:4334498-4337957	COI0	38600	OK	3.8467	4.94734	0.363032	0.748066	0.44665	0.998514	no
AT1G12740.1,AT1G12740.2,AT1G12740.3,AT1G12740.4	1:4342208-4344875	COI0	38600	NOTEST	0.287851	0.166486	-0.789919	0	1	1	no
AT1G12760.1,AT1G12760.2,AT1G12770.1,AT1G12770.2,AT1G12775.1	1:4348497-4361371	COI0	38600	OK	57.9507	61.7661	0.0919875	0.239761	0.82355	0.998514	no
AT1G12805.1	1:4366576-4367136	COI0	38600	OK	1.26167	0.265172	-2.25034	-2.15432	0.18825	0.998514	no
AT1G12810.1,AT1G12810.2	1:4367255-4371298	COI0	38600	OK	60.073	60.1878	0.00275597	0.00723208	0.99555	0.998514	no
AT1G04977.1	1:4367255-4371298	COI0	38600	OK	95.3726	92.3901	-0.0458363	-0.0909522	0.9277	0.998514	no
AT1G12840.1	1:4374204-4378514	COI0	38600	OK	58.5154	67.9321	0.215276	0.879585	0.5081	0.998514	no
AT1G12855.1	1:4382159-4383673	COI0	38600	NOTEST	0.112293	0.0651555	-0.785311	0	1	1	no
AT1G12860.1,AT1G12860.2,AT1G12860.3	1:4384303-4386651	COI0	38600	OK	16.4299	19.5375	0.249922	0.804025	0.40645	0.998514	no
AT1G12880.1	1:4389677-4391344	COI0	38600	OK	12.435	10.494	-0.244833	-0.985794	0.55955	0.998514	no
AT1G12890.1	1:4391437-4392393	COI0	38600	OK	0.624004	0.704931	0.175927	0.10936	0.8858	0.998514	no
AT1G12940.1	1:4416314-4418590	COI0	38600	NOTEST	0.257394	0.234357	-0.135266	0	1	1	no
AT1G12950.1	1:4419713-4422684	COI0	38600	OK	1.29134	0.689855	-0.904503	-1.37369	0.23265	0.998514	no
AT1G12970.1	1:4423539-4425936	COI0	38600	OK	6.20365	7.36701	0.247962	0.707508	0.5135	0.998514	no
AT1G12980.1	1:4429717-4430965	COI0	38600	NOTEST	0.171654	0	#NAME?	0	1	1	no
AT1G12990.1	1:4433604-4439639	COI0	38600	OK	11.0421	14.721	0.414864	1.52199	0.2886	0.998514	no
AT1G13010.1	1:4440213-4440286	COI0	38600	NOTEST	0	0	0	0	1	1	no
AT1G13040.1,AT1G13040.2,AT1G13050.1,AT1G13050.2,AT1G13050.3	1:4447548-4451742	COI0	38600	OK	11.4696	13.2503	0.20821	0.694141	0.5474	0.998514	no
AT1G13060.1,AT1G13060.2,AT1G13060.3	1:4452189-4454900	COI0	38600	OK	112.815	115.436	0.0331329	0.11766	0.90625	0.998514	no
AT1G13080.1,AT1G13080.2	1:4459001-4460996	COI0	38600	OK	51.1703	47.8961	-0.095398	-0.341374	0.72585	0.998514	no
AT1G13090.1,AT1G13090.2	1:4461737-4463469	COI0	38600	OK	61.5264	72.2729	0.23225	0.82969	0.39125	0.998514	no
AT1G13100.1	1:4463858-4465725	COI0	38600	OK	6.5356	6.10428	-0.0984977	-0.257711	0.7931	0.998514	no
AT1G13110.1	1:4467093-4469033	COI0	38600	OK	39.2175	23.5206	-0.737573	-2.65423	0.0107	0.385069	no
AT1G13130.1	1:4474683-4478005	COI0	38600	NOTEST	0.757034	0.375051	-1.01327	0	1	1	no
AT1G13143.1	1:4478383-4480327	COI0	38600	OK	3.03951	1.74614	-0.799667	-0.4625	0.67285	0.998514	no
AT1G13160.1	1:4484583-4492667	COI0	38600	OK	26.8914	24.398	-0.140385	-0.503108	0.6617	0.998514	no
AT1G13180.1	1:4494923-4498469	COI0	38600	OK	6.00493	5.42574	-0.146327	-0.451879	0.7195	0.998514	no
AT1G13190.1	1:4498763-4503676	COI0	38600	OK	24.5012	32.3297	0.400008	1.30381	0.16865	0.998514	no
AT1G13220.1,AT1G13220.3	1:4515463-4520306	COI0	38600	OK	13.123	15.1063	0.203052	0.640809	0.50495	0.998514	no
AT1G13230.1	1:4520558-4522644	COI0	38600	OK	1.19791	0.507256	-1.23973	-1.84608	0.1875	0.998514	no
AT1G13260.1	1:4542167-4543970	COI0	38600	OK	79.1982	56.4435	-0.488661	-2.16685	0.0801	0.915189	no
AT1G13270.1,AT1G13270.2,AT1G13280.1	1:4544888-4548894	COI0	38600	OK	40.0939	61.9226	0.627085	2.26633	0.0307	0.643694	no
AT1G13300.1	1:4556877-4558793	COI0	38600	OK	3.01773	5.51695	0.870406	1.51404	0.05825	0.832409	no
AT1G13330.1	1:4567934-4571229	COI0	38600	OK	3.12262	2.09918	-0.572934	-0.793575	0.5606	0.998514	no
AT1G13400.1	1:4597566-4599141	COI0	38600	NOTEST	0.250074	0.281328	0.169897	0	1	1	no
AT1G13410.1	1:4601234-4603635	COI0	38600	OK	1.64126	2.10156	0.356657	0.845178	0.5635	0.998514	no
AT1G13420.1	1:4604687-4606067	COI0	38600	OK	2.12327	1.18669	-0.839352	-1.58131	0.2758	0.998514	no
AT1G13430.1	1:4606499-4607780	COI0	38600	OK	28.4724	13.6909	-1.05635	-3.99957	0.0022	0.152925	no
AT1G05013.1	1:4611525-4611773	COI0	38600	NOTEST	0	0	0	0	1	1	no
AT1G13448.1	1:4612242-4615353	COI0	38600	OK	3.04953	3.98108	0.384574	0.415887	0.8601	0.998514	no
AT1G13460.1,AT1G13460.2	1:4615766-4618449	COI0	38600	OK	9.14003	9.79026	0.0991481	0.270265	0.7884	0.998514	no
AT1G13590.1	1:4647814-4649066	COI0	38600	NOTEST	0.92204	0.158168	-2.54338	0	1	1	no
AT1G13605.1	1:4658537-4659115	COI0	38600	NOTEST	0.346326	0	#NAME?	0	1	1	no
AT1G13607.1	1:4660777-4661331	COI0	38600	NOTEST	0	0	0	0	1	1	no
AT1G13608.1	1:4661681-4662428	COI0	38600	NOTEST	0	0	0	0	1	1	no
AT1G13609.1,AT1G13609.2	1:4662697-4663253	COI0	38600	NOTEST	0	0	0	0	1	1	no
AT1G13620.1,AT1G13620.2	1:4668365-4673073	COI0	38600	NOTEST	0	0	0	0	1	1	no
AT1G13635.1,AT1G13635.2	1:4674151-4676484	COI0	38600	OK	3.54372	2.19671	-0.689921	-1.12579	0.2555	0.998514	no
AT1G13670.1	1:4688017-4689265	COI0	38600	OK	7.63915	19.3257	1.33904	3.75316	0.00075	0.0729868	no
AT1G13680.1	1:4690292-4692841	COI0	38600	NOTEST	0.357269	0.348724	-0.0349256	0	1	1	no
AT1G13690.1	1:4693281-4696023	COI0	38600	OK	20.3817	20.2156	-0.0118109	-0.0367686	0.9759	0.998514	no
AT1G05023.1	1:4693281-4696023	COI0	38600	OK	1.3737	2.20567	0.683144	0.116855	0.4383	0.998514	no
AT1G13720.1	1:4709634-4709706	COI0	38600	NOTEST	0	0	0	0	1	1	no
AT1G13730.1,AT1G13730.2	1:4709756-4712672	COI0	38600	OK	28.0839	28.8502	0.0388353	0.135346	0.88875	0.998514	no
AT1G13740.1	1:4713432-4718269	COI0	38600	OK	6.95216	5.94663	-0.225389	-0.493853	0.61855	0.998514	no
AT1G13770.1,AT1G13770.2,AT1G13770.3,AT1G13770.4,AT1G13780.1,AT1G13780.2	1:4721573-4726558	COI0	38600	OK	19.2997	20.6066	0.0945326	0.368739	0.76685	0.998514	no
AT1G13790.1,AT1G13790.2	1:4726769-4733869	COI0	38600	OK	3.67847	4.25474	0.209963	0.495245	0.6285	0.998514	no
AT1G13805.1	1:4726769-4733869	COI0	38600	NOTEST	0	0	0	0	1	1	no
AT1G13810.1,AT1G13820.1	1:4733990-4737910	COI0	38600	OK	45.7944	63.3379	0.467896	1.76237	0.0917	0.951353	no
AT1G13840.1	1:4741998-4742071	COI0	38600	NOTEST	0	0	0	0	1	1	no
AT1G13850.1	1:4743094-4743167	COI0	38600	NOTEST	0	0	0	0	1	1	no
AT1G13880.1,AT1G13880.2,AT1G13880.3	1:4748830-4751234	COI0	38600	OK	24.1385	22.263	-0.116684	-0.388256	0.6948	0.998514	no
AT1G13890.1,AT1G13890.2	1:4751431-4753018	COI0	38600	NOTEST	0.437672	0	#NAME?	0	1	1	no
AT1G13910.1,AT1G13910.2,AT1G13920.2,AT1G13920.3,AT1G13920.4,AT1G13920.5,AT1G13920.6,AT1G13920.7	1:4755776-4760238	COI0	38600	OK	7.2951	6.89154	-0.0821016	-0.231528	0.8386	0.998514	no
AT1G13930.1,AT1G13930.2,AT1G13930.3	1:4760956-4766852	COI0	38600	OK	311.383	476.597	0.614081	2.33434	0.06475	0.856186	no
AT1G13950.1	1:4773433-4774935	COI0	38600	OK	14.5354	10.5918	-0.456622	-1.69762	0.31085	0.998514	no
AT1G13960.1,AT1G13960.2	1:4776282-4782546	COI0	38600	OK	13.7349	16.1983	0.238004	0.749727	0.4552	0.998514	no
AT1G13980.1,AT1G13980.2,AT1G13990.1,AT1G13990.2,AT1G13990.3	1:4788462-4796599	COI0	38600	OK	53.9474	47.7081	-0.17732	-0.538885	0.6049	0.998514	no
AT1G14000.1	1:4797357-4801850	COI0	38600	OK	41.9961	45.18	0.105428	0.30914	0.7487	0.998514	no
AT1G05043.1	1:4797357-4801850	COI0	38600	OK	0.640348	1.08968	0.766978	0.120354	0.54595	0.998514	no
AT1G14020.1	1:4802719-4807517	COI0	38600	OK	6.94687	7.16122	0.0438422	0.0966264	0.93355	0.998514	no
AT1G05047.1	1:4802719-4807517	COI0	38600	OK	12.1331	9.47756	-0.35636	-0.263822	0.78955	0.998514	no
AT1G14040.1	1:4810114-4814724	COI0	38600	OK	4.10646	3.12638	-0.3934	-1.12901	0.33915	0.998514	no
AT1G14080.1	1:4822438-4824414	COI0	38600	NOTEST	0.718759	0.66336	-0.115716	0	1	1	no
AT1G14100.1	1:4827960-4829587	COI0	38600	NOTEST	0.566246	0.56504	-0.00307474	0	1	1	no
AT1G14110.1	1:4830296-4831915	COI0	38600	NOTEST	0	0	0	0	1	1	no
AT1G05053.1	1:4832650-4832858	COI0	38600	NOTEST	0	0	0	0	1	1	no
AT1G14150.1,AT1G14150.2	1:4839800-4841848	COI0	38600	OK	56.9525	108.936	0.935644	2.97855	0.0009	0.0841086	no
AT1G05057.1	1:4842274-4842469	COI0	38600	NOTEST	0	0	0	0	1	1	no
AT1G14180.1,AT1G14180.2	1:4847161-4849413	COI0	38600	OK	5.66327	5.86471	0.0504235	0.12293	0.8968	0.998514	no
AT1G14185.1	1:4850116-4852096	COI0	38600	OK	0.539563	0.868337	0.686464	0.921842	0.4199	0.998514	no
AT1G14190.1,AT1G14190.2	1:4852521-4855287	COI0	38600	OK	1.44719	2.18674	0.595526	0.691478	0.47985	0.998514	no
AT1G14205.1	1:4855532-4856762	COI0	38600	OK	3.24584	8.17377	1.33241	2.9496	0.0827	0.922867	no
AT1G14230.1	1:4861167-4864094	COI0	38600	OK	13.3256	10.944	-0.284065	-1.05051	0.395	0.998514	no
AT1G14240.1,AT1G14240.2,AT1G14240.3,AT1G14240.4	1:4864880-4868011	COI0	38600	OK	2.83778	2.4748	-0.19745	-0.367622	0.7036	0.998514	no
AT1G14250.1	1:4868345-4871488	COI0	38600	NOTEST	0.0826839	0.0972322	0.233828	0	1	1	no
AT1G14260.1,AT1G14260.2,AT1G14260.3	1:4872855-4877256	COI0	38600	OK	1.90365	1.35277	-0.492848	-0.410236	0.761	0.998514	no
AT1G14280.1	1:4877505-4879307	COI0	38600	OK	35.4207	28.1401	-0.331963	-1.62075	0.25875	0.998514	no
AT1G14310.1	1:4884950-4887933	COI0	38600	OK	14.5116	15.0525	0.0527981	0.153846	0.8932	0.998514	no
AT1G14320.1,AT1G14320.2	1:4888113-4889704	COI0	38600	OK	723.972	673.137	-0.105034	-0.315534	0.74665	0.998514	no
AT1G14340.1,AT1G14345.1	1:4897345-4900054	COI0	38600	OK	127.018	165.431	0.381203	1.3364	0.18265	0.998514	no
AT1G05067.1	1:4902918-4903476	COI0	38600	NOTEST	0	0	0	0	1	1	no
AT1G14350.1,AT1G14350.2,AT1G14350.3,AT1G14350.4	1:4907886-4913167	COI0	38600	OK	18.6337	17.2419	-0.111998	-0.308307	0.8012	0.998514	no
AT1G14370.1	1:4915490-4921682	COI0	38600	OK	14.0062	13.9502	-0.00577711	-0.0139639	0.98845	0.998514	no
AT1G05083.1	1:4915490-4921682	COI0	38600	NOTEST	0	0.164986	inf	0	1	1	no
AT1G14390.1	1:4924036-4928812	COI0	38600	OK	1.10573	0.933125	-0.244861	-0.162711	0.9102	0.998514	no
AT1G14430.1	1:4934119-4936194	COI0	38600	OK	4.70733	3.2331	-0.541989	-1.17538	0.1911	0.998514	no
AT1G14453.1	1:4946191-4948400	COI0	38600	OK	60.8664	41.8071	-0.541897	-1.63422	0.1721	0.998514	no
AT1G05093.1	1:4948637-4953522	COI0	38600	NOTEST	0	0	0	0	1	1	no
AT1G14470.1	1:4954036-4955702	COI0	38600	OK	1.69932	1.6683	-0.0265807	-0.0556377	0.9683	0.998514	no
AT1G14480.1,AT1G14480.2	1:4956230-4958076	COI0	38600	OK	2.3086	5.01936	1.12049	2.10803	0.03645	0.693386	no
AT1G14500.1	1:4960307-4964515	COI0	38600	NOTEST	0	0	0	0	1	1	no
AT1G14550.1	1:4978921-4980466	COI0	38600	NOTEST	0.336714	0.135228	-1.31612	0	1	1	no
AT1G14560.1,AT1G14560.2,AT1G14560.3	1:4980623-4983367	COI0	38600	OK	15.8922	15.9898	0.00883412	0.0279122	0.97635	0.998514	no
AT1G14570.1,AT1G14570.2,AT1G14570.3,AT1G14570.4	1:4983488-4987375	COI0	38600	OK	35.8321	37.6796	0.0725316	0.257217	0.79305	0.998514	no
AT1G14580.1,AT1G14580.2,AT1G14580.3,AT1G14580.4	1:4989561-4992805	COI0	38600	OK	8.30176	8.47911	0.0304958	0.0871233	0.9266	0.998514	no
AT1G05103.1	1:4996757-4997187	COI0	38600	OK	0.875107	0	#NAME?	#NAME?	0.00405	0.219565	no
AT1G14630.1,AT1G14630.2	1:5019799-5021653	COI0	38600	OK	15.813	12.1465	-0.380579	-0.985119	0.3214	0.998514	no
AT1G14640.1,AT1G14640.2	1:5023425-5025955	COI0	38600	OK	4.43484	3.99186	-0.15182	-0.358475	0.72015	0.998514	no
AT1G14642.1	1:5026363-5026585	COI0	38600	NOTEST	0	0	0	0	1	1	no
AT1G14650.1,AT1G14650.2,AT1G14650.3	1:5027315-5031883	COI0	38600	OK	32.2046	35.8095	0.153077	0.549075	0.5797	0.998514	no
AT1G05113.1	1:5031942-5036720	COI0	38600	NOTEST	0	0	0	0	1	1	no
AT1G14670.1	1:5037575-5040597	COI0	38600	OK	73.2158	69.2796	-0.0797234	-0.408247	0.7709	0.998514	no
AT1G14680.1	1:5040753-5041967	COI0	38600	OK	2.86407	2.56479	-0.159228	-0.33688	0.8038	0.998514	no
AT1G14685.1,AT1G14685.2,AT1G14685.3,AT1G14685.4	1:5042239-5045556	COI0	38600	OK	24.5799	30.2551	0.299703	0.994764	0.31195	0.998514	no
AT1G14687.1	1:5047781-5048753	COI0	38600	OK	2.42931	2.33757	-0.0555339	-0.0843435	0.92655	0.998514	no
AT1G05117.1	1:5051297-5051561	COI0	38600	NOTEST	0	0	0	0	1	1	no
AT1G14700.1,AT1G14700.2,AT1G14700.3,AT1G14700.4	1:5058582-5061140	COI0	38600	OK	14.0578	25.0027	0.830705	2.55577	0.01095	0.389307	no
AT1G14730.1	1:5073030-5074798	COI0	38600	OK	19.3054	18.1423	-0.0896452	-0.324025	0.7906	0.998514	no
AT1G14755.1	1:5083675-5085263	COI0	38600	NOTEST	0.246838	0	#NAME?	0	1	1	no
AT1G14780.1	1:5090808-5098270	COI0	38600	OK	1.6683	1.87512	0.168598	0.199518	0.83105	0.998514	no
AT1G14800.1	1:5099571-5104850	COI0	38600	NOTEST	0	0	0	0	1	1	no
AT1G05123.1	1:5099571-5104850	COI0	38600	NOTEST	0	0	0	0	1	1	no
AT1G14860.1	1:5124669-5126280	COI0	38600	OK	1.67642	2.4273	0.53397	1.14564	0.46135	0.998514	no
AT1G05127.1	1:5131511-5131859	COI0	38600	NOTEST	0	0	0	0	1	1	no
AT1G14890.1	1:5136873-5137982	COI0	38600	OK	35.7498	24.3965	-0.551264	-1.76209	0.06485	0.856654	no
AT1G05133.1	1:5146657-5147266	COI0	38600	NOTEST	0	0	0	0	1	1	no
AT1G14920.1	1:5148981-5151415	COI0	38600	OK	21.4687	17.4121	-0.302146	-1.31883	0.30925	0.998514	no
AT1G15000.1	1:5168463-5170571	COI0	38600	NOTEST	0	0	0	0	1	1	no
AT1G15010.1	1:5171180-5171956	COI0	38600	OK	2.37264	1.92165	-0.304143	-0.617112	0.73995	0.998514	no
AT1G15015.1	1:5172080-5176479	COI0	38600	NOTEST	0	0	0	0	1	1	no
AT1G15030.1,AT1G15030.2	1:5177479-5181402	COI0	38600	OK	22.2956	23.9101	0.100857	0.426758	0.75965	0.998514	no
AT1G05147.1	1:5177479-5181402	COI0	38600	OK	4.05316	4.12105	0.0239642	0.0151747	0.97175	0.998514	no
AT1G15080.1	1:5187548-5189673	COI0	38600	OK	3.61589	5.99345	0.729037	2.01582	0.17375	0.998514	no
AT1G05153.1	1:5191673-5192854	COI0	38600	NOTEST	0	0	0	0	1	1	no
AT1G15085.1	1:5191673-5192854	COI0	38600	NOTEST	0	0	0	0	1	1	no
AT1G15110.1,AT1G15110.2,AT1G15110.3,AT1G15110.4	1:5198939-5202315	COI0	38600	OK	11.7885	9.7927	-0.267599	-0.805509	0.40405	0.998514	no
AT1G15120.1,AT1G15120.2,AT1G15125.1,AT1G15125.2	1:5202592-5205964	COI0	38600	OK	107.336	71.5796	-0.58452	-3.26833	0.0375	0.702019	no
AT1G15150.1,AT1G15150.2	1:5212474-5215042	COI0	38600	NOTEST	0.233757	0.182476	-0.357302	0	1	1	no
AT1G15160.1	1:5215344-5217545	COI0	38600	OK	1.56463	0.53824	-1.5395	-2.46113	0.10285	0.983179	no
AT1G15170.1,AT1G15170.2	1:5220402-5224143	COI0	38600	OK	9.79589	9.6389	-0.0233087	-0.085942	0.94925	0.998514	no
AT1G15180.1,AT1G15180.2	1:5224293-5226778	COI0	38600	OK	30.3793	43.8601	0.529823	1.83695	0.0614	0.843637	no
AT1G15190.1	1:5226981-5228202	COI0	38600	OK	2.41984	1.28246	-0.915997	-1.53755	0.20925	0.998514	no
AT1G15215.1,AT1G15215.2,AT1G15215.3,AT1G15215.4	1:5238043-5241541	COI0	38600	OK	12.7928	12.608	-0.0209891	-0.0576978	0.9699	0.998514	no
AT1G15240.1,AT1G15240.2,AT1G15240.3,AT1G15240.4,AT1G15240.5	1:5243382-5249676	COI0	38600	OK	18.4637	21.895	0.245911	0.842128	0.42005	0.998514	no
AT1G15260.1	1:5249759-5250573	COI0	38600	OK	61.9811	50.9343	-0.283191	-1.38283	0.3524	0.998514	no
AT1G15280.1,AT1G15280.2	1:5252284-5256863	COI0	38600	OK	45.592	52.5989	0.206252	0.722872	0.4581	0.998514	no
AT1G15330.1	1:5274270-5275602	COI0	38600	NOTEST	0	0.0792857	inf	0	1	1	no
AT1G15360.1,AT1G15360.2	1:5283267-5284736	COI0	38600	OK	6.25452	1.54153	-2.02054	-3.424	0.0033	0.194097	no
AT1G15370.1	1:5286865-5288640	COI0	38600	OK	50.3608	42.7617	-0.235981	-1.14834	0.4377	0.998514	no
AT1G15380.1,AT1G15380.2	1:5290581-5292582	COI0	38600	OK	32.2979	29.4431	-0.13351	-0.427666	0.66275	0.998514	no
AT1G15390.1	1:5294628-5297075	COI0	38600	OK	28.4456	31.8015	0.160893	0.43022	0.76175	0.998514	no
AT1G15410.1,AT1G15410.2	1:5297846-5303522	COI0	38600	OK	31.7993	15.1596	-1.06876	-3.48187	0.0072	0.306291	no
AT1G15430.1,AT1G15430.2	1:5304097-5309558	COI0	38600	OK	5.53999	7.05451	0.348663	0.445818	0.65945	0.998514	no
AT1G15470.1,AT1G15470.2,AT1G15480.1	1:5315498-5323895	COI0	38600	OK	18.9445	21.3471	0.172259	0.506695	0.6361	0.998514	no
AT1G15500.1	1:5326289-5328875	COI0	38600	OK	140.76	152.426	0.114871	0.437736	0.7011	0.998514	no
AT1G15510.1	1:5329063-5331711	COI0	38600	OK	9.80201	17.7947	0.8603	3.53948	0.00755	0.313922	no
AT1G15540.1,AT1G15540.2,AT1G15540.3	1:5342089-5343876	COI0	38600	NOTEST	0	0	0	0	1	1	no
AT1G05173.1	1:5356373-5356587	COI0	38600	NOTEST	0	0	0	0	1	1	no
AT1G15570.1	1:5361864-5366497	COI0	38600	OK	9.06013	9.27708	0.0341399	0.106449	0.9191	0.998514	no
AT1G15590.1,AT1G15590.2	1:5367296-5368670	COI0	38600	NOTEST	0	0	0	0	1	1	no
AT1G15600.1	1:5368922-5370344	COI0	38600	NOTEST	0	0	0	0	1	1	no
AT1G15610.1,AT1G15610.2	1:5370676-5371859	COI0	38600	NOTEST	0	0	0	0	1	1	no
AT1G15620.1	1:5373458-5374575	COI0	38600	NOTEST	0	0	0	0	1	1	no
AT1G15625.1	1:5374754-5375910	COI0	38600	NOTEST	0.599974	0.68036	0.181398	0	1	1	no
AT1G15630.1	1:5376792-5378056	COI0	38600	NOTEST	0.107173	0	#NAME?	0	1	1	no
AT1G15640.1,AT1G15640.2	1:5378885-5380239	COI0	38600	NOTEST	0	0	0	0	1	1	no
AT1G15650.1	1:5380906-5380988	COI0	38600	NOTEST	0	0	0	0	1	1	no
AT1G15660.1	1:5381031-5385380	COI0	38600	OK	7.23947	7.54499	0.0596352	0.167479	0.8488	0.998514	no
AT1G15670.1	1:5389951-5391672	COI0	38600	OK	42.6509	15.4459	-1.46535	-6.15868	5e-05	0.00838689	yes
AT1G15680.1	1:5393406-5394639	COI0	38600	NOTEST	0	0.0827279	inf	0	1	1	no
AT1G15690.1,AT1G15690.2	1:5398925-5403853	COI0	38600	OK	207.528	278.565	0.424705	1.69233	0.19035	0.998514	no
AT1G15710.1	1:5404129-5405910	COI0	38600	OK	18.1709	18.8329	0.0516309	0.212617	0.8683	0.998514	no
AT1G15720.1	1:5406024-5410043	COI0	38600	NOTEST	0.625901	0.282962	-1.14533	0	1	1	no
AT1G15740.1	1:5410907-5421033	COI0	38600	OK	40.8258	46.0822	0.17473	0.342132	0.786	0.998514	no
AT1G05197.1	1:5421187-5421431	COI0	38600	NOTEST	0	0	0	0	1	1	no
AT1G15760.1	1:5425615-5426666	COI0	38600	OK	2.66966	1.84811	-0.530601	-0.991289	0.46635	0.998514	no
AT1G15810.1	1:5444219-5447880	COI0	38600	OK	20.7668	22.7157	0.129413	0.0484711	0.96325	0.998514	no
AT1G05207.1	1:5444219-5447880	COI0	38600	OK	63.2504	123.594	0.966457	0.17726	0.79965	0.998514	no
AT1G15830.1,AT1G15830.2,AT1G15830.3	1:5448059-5450617	COI0	38600	OK	10.6825	6.21331	-0.781813	-2.13447	0.0306	0.642284	no
AT1G15840.1	1:5451431-5452374	COI0	38600	NOTEST	0	0	0	0	1	1	no
AT1G15860.1,AT1G15860.2,AT1G15860.3	1:5454765-5457022	COI0	38600	OK	34.5948	44.6323	0.36753	1.23746	0.20355	0.998514	no
AT1G15870.1	1:5457083-5460359	COI0	38600	OK	2.84326	4.32463	0.60503	0.688828	0.55845	0.998514	no
AT1G15885.1,AT1G15890.1,AT1G15890.2,AT1G15900.1	1:5460476-5464947	COI0	38600	OK	5.90376	8.12384	0.460528	0.9969	0.45715	0.998514	no
AT1G15910.1	1:5465250-5469180	COI0	38600	OK	11.0403	9.62086	-0.198537	-0.62708	0.52305	0.998514	no
AT1G15920.1,AT1G15920.2	1:5469254-5471149	COI0	38600	OK	16.7523	15.1898	-0.141258	-0.423029	0.66895	0.998514	no
AT1G15930.1,AT1G15930.2	1:5471315-5473048	COI0	38600	OK	195.615	161.056	-0.280455	-0.996837	0.3099	0.998514	no
AT1G15940.1	1:5473358-5478405	COI0	38600	OK	20.4891	22.9545	0.163918	0.574711	0.55575	0.998514	no
AT1G15950.1,AT1G15950.2,AT1G15950.3,AT1G15950.4,AT1G15950.5,AT1G15950.6,AT1G15950.7	1:5478602-5486105	COI0	38600	OK	166.929	173.454	0.0553215	0.165309	0.87145	0.998514	no
AT1G15980.1	1:5489144-5494192	COI0	38600	OK	93.4543	160.162	0.7772	3.04806	0.0069	0.300033	no
AT1G16000.1	1:5494532-5495359	COI0	38600	OK	18.8809	22.4102	0.247222	0.923478	0.59825	0.998514	no
AT1G16020.1,AT1G16020.2,AT1G16020.3,AT1G16020.4	1:5498011-5501959	COI0	38600	OK	12.1046	14.8789	0.297712	1.11333	0.34785	0.998514	no
AT1G16025.1	1:5498011-5501959	COI0	38600	NOTEST	0	0	0	0	1	1	no
AT1G16040.1,AT1G16040.2,AT1G16040.3,AT1G16040.4	1:5504607-5507059	COI0	38600	OK	14.9085	13.3915	-0.154824	-0.416978	0.6739	0.998514	no
AT1G16060.1,AT1G16060.2,AT1G16060.3,AT1G16060.4,AT1G16060.5,AT1G16060.6,AT1G16060.7	1:5508310-5513980	COI0	38600	OK	5.78794	2.79363	-1.05091	-1.83159	0.06185	0.845676	no
AT1G16080.1	1:5514261-5516027	COI0	38600	OK	65.5711	103.241	0.654877	3.30817	0.02265	0.568432	no
AT1G16090.1	1:5516258-5517822	COI0	38600	OK	2.82772	3.46313	0.292435	0.601942	0.60735	0.998514	no
AT1G16110.1	1:5518218-5520929	COI0	38600	OK	3.14298	3.33122	0.0839179	0.220882	0.8534	0.998514	no
AT1G16120.1,AT1G16130.1	1:5522601-5528212	COI0	38600	OK	1.87719	1.99642	0.0888408	0.180597	0.85485	0.998514	no
AT1G16150.1	1:5532297-5535060	COI0	38600	NOTEST	0.169196	0.132409	-0.353687	0	1	1	no
AT1G16160.1	1:5535765-5538501	COI0	38600	NOTEST	0.115818	0.0689037	-0.749203	0	1	1	no
AT1G16180.1,AT1G16180.2	1:5540049-5542902	COI0	38600	OK	95.1533	91.6599	-0.0539635	-0.193409	0.8453	0.998514	no
AT1G16190.1,AT1G16190.2	1:5543118-5547753	COI0	38600	OK	20.784	20.5713	-0.0148396	-0.0306626	0.9747	0.998514	no
AT1G16220.1	1:5548261-5550770	COI0	38600	OK	4.3406	3.90313	-0.153262	-0.392016	0.71865	0.998514	no
AT1G05223.1	1:5552867-5553111	COI0	38600	NOTEST	0	0	0	0	1	1	no
AT1G16250.1,AT1G16250.2	1:5556963-5562192	COI0	38600	OK	12.8064	13.5429	0.0806694	0.218103	0.86895	0.998514	no
AT1G16270.1,AT1G16270.2,AT1G16270.3	1:5562860-5570679	COI0	38600	OK	14.0604	13.5789	-0.0502638	-0.152944	0.8724	0.998514	no
AT1G16300.1	1:5574256-5577622	COI0	38600	OK	7.67797	6.00435	-0.354717	-0.99541	0.37175	0.998514	no
AT1G16310.1,AT1G16310.2	1:5578264-5580730	COI0	38600	OK	6.9603	6.21887	-0.162497	-0.373666	0.70215	0.998514	no
AT1G16320.1	1:5580820-5582154	COI0	38600	OK	102.666	166.439	0.697035	3.36444	0.0137	0.44383	no
AT1G16350.1	1:5587721-5593098	COI0	38600	OK	58.0863	73.0556	0.330798	1.10575	0.25615	0.998514	no
AT1G16370.1	1:5596632-5601367	COI0	38600	OK	5.47441	3.26481	-0.745702	-1.48987	0.13605	0.998514	no
AT1G16390.1	1:5602785-5604770	COI0	38600	OK	2.97484	1.78283	-0.738641	-1.71677	0.20205	0.998514	no
AT1G16400.1	1:5605043-5607498	COI0	38600	OK	34.8446	25.6248	-0.443395	-1.68722	0.1204	0.998514	no
AT1G16410.1,AT1G16410.2	1:5608681-5612064	COI0	38600	OK	76.827	52.7701	-0.541891	-1.87751	0.05685	0.825426	no
AT1G16430.1	1:5614592-5615660	COI0	38600	OK	7.28767	4.56101	-0.676105	-1.82741	0.2976	0.998514	no
AT1G16440.1	1:5615807-5617672	COI0	38600	NOTEST	0.274335	0.142355	-0.946451	0	1	1	no
AT1G16445.1	1:5617785-5619456	COI0	38600	OK	4.46923	6.27381	0.489317	1.17664	0.35775	0.998514	no
AT1G16470.1,AT1G16470.2	1:5622745-5625683	COI0	38600	OK	72.9203	64.729	-0.171908	-0.606281	0.53585	0.998514	no
AT1G05227.1,AT1G16489.1,AT1G16489.2,AT1G16489.3,AT1G16489.4	1:5625698-5631131	COI0	38600	OK	3.30106	2.31561	-0.511538	-0.76081	0.5715	0.998514	no
AT1G16500.1	1:5638778-5640202	COI0	38600	OK	8.98155	3.09144	-1.53869	-3.4911	0.00345	0.198555	no
AT1G05233.1	1:5642763-5642985	COI0	38600	NOTEST	0	0	0	0	1	1	no
AT1G05237.1	1:5646665-5646969	COI0	38600	NOTEST	0	0	0	0	1	1	no
AT1G16520.1	1:5648635-5651167	COI0	38600	OK	16.2167	16.1618	-0.00489235	-0.0150242	0.98565	0.998514	no
AT1G16540.1,AT1G16540.2,AT1G16540.3	1:5659369-5665488	COI0	38600	OK	7.81891	8.77802	0.166929	0.504342	0.60745	0.998514	no
AT1G16560.1,AT1G16560.2,AT1G16560.3,AT1G16560.4,AT1G16560.5,AT1G16560.6,AT1G16560.7,AT1G16560.8,AT1G16560.9	1:5668383-5673600	COI0	38600	OK	39.9526	41.2784	0.0470974	0.181351	0.89015	0.998514	no
AT1G16590.1,AT1G16590.2	1:5673706-5675143	COI0	38600	OK	4.19598	3.82882	-0.132109	-0.231183	0.815	0.998514	no
AT1G16640.1	1:5686524-5687727	COI0	38600	OK	3.05292	2.01262	-0.601114	-1.19898	0.45865	0.998514	no
AT1G16650.1,AT1G16650.2,AT1G16650.3	1:5687870-5691369	COI0	38600	OK	8.96868	7.88879	-0.185093	-0.480916	0.62815	0.998514	no
AT1G16670.1	1:5697215-5699870	COI0	38600	OK	11.6414	8.04714	-0.532716	-1.67033	0.1233	0.998514	no
AT1G16680.1,AT1G16690.1	1:5702152-5709563	COI0	38600	OK	19.097	18.5366	-0.0429658	-0.182423	0.8805	0.998514	no
AT1G16700.1,AT1G16705.1,AT1G16705.2,AT1G16705.3,AT1G16710.1,AT1G16710.10,AT1G16710.2,AT1G16710.3,AT1G16710.4,AT1G16710.5,AT1G16710.6,AT1G16710.7,AT1G16710.8,AT1G16710.9	1:5709623-5722614	COI0	38600	OK	54.4211	52.8362	-0.0426399	-0.143296	0.89765	0.998514	no
AT1G16720.1,AT1G16720.2,AT1G16720.3	1:5722890-5727406	COI0	38600	OK	48.9509	71.5464	0.547545	1.64482	0.10205	0.981106	no
AT1G05257.1	1:5722890-5727406	COI0	38600	NOTEST	0	0	0	0	1	1	no
AT1G16740.1	1:5727621-5731934	COI0	38600	OK	41.4629	37.7562	-0.135107	-0.440717	0.7249	0.998514	no
AT1G16760.1,AT1G16760.2	1:5734189-5737704	COI0	38600	NOTEST	0.0307802	0	#NAME?	0	1	1	no
AT1G16770.1,AT1G16770.2,AT1G16770.3	1:5737838-5739377	COI0	38600	NOTEST	0.319258	0.513031	0.684323	0	1	1	no
AT1G16790.1	1:5739467-5755468	COI0	38600	NOTEST	0	0	0	0	1	1	no
AT1G16810.1,AT1G16810.2,AT1G16810.3	1:5755587-5758653	COI0	38600	OK	255.331	231.925	-0.138713	-0.905494	0.61915	0.998514	no
AT1G05267.1,AT1G05273.1	1:5755587-5758653	COI0	38600	OK	0	1.04878	inf	#NAME?	0.1945	0.998514	no
AT1G16825.1,AT1G16825.2	1:5758854-5760509	COI0	38600	OK	5.20793	4.33536	-0.264557	-0.382003	0.6993	0.998514	no
AT1G16830.1	1:5760625-5762619	COI0	38600	OK	3.81277	3.81058	-0.000827123	-0.00267469	0.9813	0.998514	no
AT1G16860.1	1:5767299-5770602	COI0	38600	OK	22.1653	22.0039	-0.0105452	-0.0430921	0.9728	0.998514	no
AT1G16880.1,AT1G16880.2	1:5773511-5778529	COI0	38600	OK	257.983	362.536	0.49085	2.11362	0.17075	0.998514	no
AT1G05277.1	1:5773511-5778529	COI0	38600	OK	0.470256	1.09654	1.22145	0.112356	0.3056	0.998514	no
AT1G16910.1	1:5785002-5785959	COI0	38600	NOTEST	0.405918	0.0999885	-2.02135	0	1	1	no
AT1G16930.1,AT1G16930.2,AT1G16930.3	1:5789678-5791752	COI0	38600	OK	4.66231	2.95884	-0.656012	-1.19649	0.22845	0.998514	no
AT1G16940.1	1:5791982-5793491	COI0	38600	NOTEST	0.169991	0.194329	0.193045	0	1	1	no
AT1G16945.1	1:5793904-5794197	COI0	38600	NOTEST	0	0	0	0	1	1	no
AT1G16950.1	1:5795878-5796666	COI0	38600	OK	2.67767	1.08609	-1.30184	-2.05743	0.1645	0.998514	no
AT1G16960.1	1:5799740-5805811	COI0	38600	OK	11.084	8.94012	-0.310108	-0.57016	0.6282	0.998514	no
AT1G16980.1,AT1G16980.2	1:5807199-5811610	COI0	38600	NOTEST	0	0	0	0	1	1	no
AT1G17000.1	1:5812727-5816662	COI0	38600	NOTEST	0	0	0	0	1	1	no
AT1G17010.1	1:5817566-5819352	COI0	38600	NOTEST	0	0	0	0	1	1	no
AT1G17020.1	1:5820079-5822013	COI0	38600	OK	27.9384	19.9639	-0.484856	-2.10712	0.11995	0.998514	no
AT1G17030.1	1:5822308-5824464	COI0	38600	OK	1.55964	0.824832	-0.919043	-1.19408	0.17135	0.998514	no
AT1G17040.1,AT1G17040.2,AT1G17040.3	1:5824770-5828266	COI0	38600	OK	7.77608	6.8369	-0.185699	-0.506863	0.60005	0.998514	no
AT1G17050.1	1:5828816-5831383	COI0	38600	OK	65.0438	91.6293	0.494397	1.75192	0.0766	0.903969	no
AT1G17065.1	1:5832093-5835488	COI0	38600	NOTEST	0.58796	0.535907	-0.133736	0	1	1	no
AT1G17070.1	1:5837498-5841745	COI0	38600	OK	9.65892	8.60445	-0.166779	-0.394425	0.69465	0.998514	no
AT1G17100.1	1:5844645-5845661	COI0	38600	OK	122.196	169.528	0.472325	1.85819	0.0911	0.949478	no
AT1G17120.1	1:5851859-5853987	COI0	38600	OK	19.5599	16.8003	-0.219415	-1.15844	0.4945	0.998514	no
AT1G17130.1,AT1G17130.2	1:5854092-5858550	COI0	38600	OK	31.2603	38.9178	0.316099	0.852386	0.4072	0.998514	no
AT1G05297.1	1:5854092-5858550	COI0	38600	NOTEST	0.670685	0	#NAME?	0	1	1	no
AT1G17150.1,AT1G17160.1,AT1G17160.2	1:5865706-5869436	COI0	38600	OK	10.9986	7.16513	-0.618253	-1.68926	0.08535	0.931085	no
AT1G17170.1	1:5869542-5870883	COI0	38600	OK	9.50644	5.70908	-0.735646	-1.93023	0.09995	0.977518	no
AT1G17180.1	1:5872023-5873124	COI0	38600	OK	1.31323	2.08954	0.670067	0.970088	0.3659	0.998514	no
AT1G17190.1	1:5875294-5876620	COI0	38600	OK	6.42272	4.54104	-0.500162	-1.29195	0.3411	0.998514	no
AT1G17200.1,AT1G17200.2	1:5878389-5884773	COI0	38600	OK	52.4328	43.9425	-0.254853	-0.603755	0.7101	0.998514	no
AT1G17220.1	1:5885006-5890500	COI0	38600	OK	101.828	151.668	0.57478	1.94546	0.07755	0.906459	no
AT1G17230.1,AT1G17230.2,AT1G17230.3	1:5890615-5895141	COI0	38600	OK	8.11473	8.13748	0.00403849	0.0142547	0.9884	0.998514	no
AT1G17235.1	1:5895350-5896250	COI0	38600	NOTEST	0.876022	0.277971	-1.65603	0	1	1	no
AT1G17255.1,AT1G17255.2	1:5899971-5903773	COI0	38600	OK	0.516958	0.898278	0.797116	1.00638	0.3725	0.998514	no
AT1G17260.1	1:5904057-5908898	COI0	38600	OK	1.72059	1.04871	-0.714296	-1.54166	0.23585	0.998514	no
AT1G17285.1,AT1G17285.2	1:5920541-5921483	COI0	38600	NOTEST	0.322933	0.571029	0.822329	0	1	1	no
AT1G17290.1	1:5922331-5926400	COI0	38600	OK	78.5556	81.1261	0.046452	0.191561	0.87	0.998514	no
AT1G17300.2	1:5926635-5927784	COI0	38600	NOTEST	0	0	0	0	1	1	no
AT1G17330.1	1:5929825-5931926	COI0	38600	OK	12.7482	10.3024	-0.307319	-0.842022	0.4048	0.998514	no
AT1G17340.1	1:5933779-5938817	COI0	38600	OK	10.5168	12.4224	0.240248	0.810338	0.41525	0.998514	no
AT1G17345.1,AT1G17350.1,AT1G17350.2,AT1G17350.3,AT1G17350.4,AT1G17350.5	1:5940291-5944465	COI0	38600	OK	9.47922	7.46992	-0.343675	-0.807416	0.42225	0.998514	no
AT1G17360.1	1:5946447-5957511	COI0	38600	OK	25.7077	33.4746	0.380866	1.05268	0.35035	0.998514	no
AT1G05307.1	1:5962529-5962906	COI0	38600	NOTEST	0	0	0	0	1	1	no
AT1G17420.1	1:5977322-5981521	COI0	38600	OK	2.90573	3.60277	0.310205	0.740619	0.42475	0.998514	no
AT1G17430.1	1:5982144-5987934	COI0	38600	OK	4.83897	3.81087	-0.344578	-0.364493	0.7406	0.998514	no
AT1G17455.1,AT1G17455.2	1:5997056-5998599	COI0	38600	OK	5.38797	6.03549	0.163729	0.290592	0.76215	0.998514	no
AT1G17460.1,AT1G17460.2,AT1G17460.3	1:5998764-6002732	COI0	38600	OK	6.15063	7.89953	0.361032	0.976358	0.32185	0.998514	no
AT1G17470.1,AT1G17470.2	1:6002887-6006410	COI0	38600	OK	81.1722	79.5701	-0.0287587	-0.101583	0.9183	0.998514	no
AT1G17490.1	1:6006412-6009420	COI0	38600	OK	30.5416	19.678	-0.634192	-1.51178	0.11825	0.998514	no
AT1G17500.1,AT1G17500.2	1:6017807-6023503	COI0	38600	OK	10.2533	8.91889	-0.201151	-0.674582	0.5	0.998514	no
AT1G17530.1,AT1G17530.2	1:6024635-6029115	COI0	38600	OK	54.3577	50.5557	-0.104609	-0.310887	0.7472	0.998514	no
AT1G17545.1	1:6033108-6033908	COI0	38600	NOTEST	0	0	0	0	1	1	no
AT1G17550.1,AT1G17550.2	1:6034269-6037398	COI0	38600	OK	28.1993	34.0978	0.274021	0.974277	0.3178	0.998514	no
AT1G17570.1	1:6038756-6038838	COI0	38600	NOTEST	0	0	0	0	1	1	no
AT1G17580.1	1:6039249-6049685	COI0	38600	OK	12.8478	18.0032	0.486729	1.85131	0.0828	0.923108	no
AT1G17610.1,AT1G17610.2	1:6052935-6058357	COI0	38600	OK	1.64844	1.40507	-0.23046	-0.353936	0.71235	0.998514	no
AT1G17615.1	1:6059388-6060851	COI0	38600	NOTEST	0.0663233	0	#NAME?	0	1	1	no
AT1G17620.1	1:6061894-6063362	COI0	38600	OK	32.1888	32.7402	0.0245052	0.0873836	0.9331	0.998514	no
AT1G17630.1,AT1G17630.2	1:6064481-6074525	COI0	38600	OK	1.4107	1.75185	0.312472	0.425846	0.74795	0.998514	no
AT1G17660.1	1:6075819-6075891	COI0	38600	NOTEST	0	0	0	0	1	1	no
AT1G17680.1,AT1G17680.2,AT1G17680.3	1:6076070-6082395	COI0	38600	OK	11.8868	12.9359	0.122022	0.415376	0.6714	0.998514	no
AT1G17700.1	1:6089459-6090339	COI0	38600	OK	17.4264	12.1873	-0.515898	-1.76825	0.2096	0.998514	no
AT1G17730.1	1:6099038-6100397	COI0	38600	OK	41.6981	36.3802	-0.19683	-0.90938	0.5182	0.998514	no
AT1G17745.1,AT1G17745.2	1:6100960-6105347	COI0	38600	OK	50.9843	43.6697	-0.223422	-0.793227	0.4172	0.998514	no
AT1G17750.1	1:6106322-6116617	COI0	38600	OK	1.88474	1.70916	-0.141084	-0.195869	0.8679	0.998514	no
AT1G17770.1	1:6120740-6122822	COI0	38600	NOTEST	0	0	0	0	1	1	no
AT1G17780.1,AT1G17780.2,AT1G17780.3,AT1G17780.4,AT1G17780.5,AT1G17780.6	1:6123566-6127567	COI0	38600	OK	18.8958	19.5679	0.0504192	0.181316	0.90375	0.998514	no
AT1G17800.1	1:6128822-6129508	COI0	38600	NOTEST	0	0	0	0	1	1	no
AT1G17810.1	1:6130024-6135345	COI0	38600	NOTEST	0.168292	0.0691403	-1.28337	0	1	1	no
AT1G17840.1	1:6142401-6148940	COI0	38600	OK	66.9078	63.0313	-0.086106	-0.340876	0.778	0.998514	no
AT1G05343.1	1:6142401-6148940	COI0	38600	NOTEST	0	0	0	0	1	1	no
AT1G17860.1	1:6149177-6152222	COI0	38600	NOTEST	0.49942	0.229638	-1.12089	0	1	1	no
AT1G05353.1	1:6149177-6152222	COI0	38600	NOTEST	0	0	0	0	1	1	no
AT1G17910.1	1:6159125-6161615	COI0	38600	NOTEST	0	0	0	0	1	1	no
AT1G05357.1	1:6161869-6165820	COI0	38600	OK	1.20797	1.86777	0.628729	0.139115	0.5561	0.998514	no
AT1G17950.1	1:6177480-6179289	COI0	38600	NOTEST	0.246476	0.281483	0.191602	0	1	1	no
AT1G17970.1,AT1G17970.2	1:6184716-6191708	COI0	38600	OK	7.82302	8.46343	0.113516	0.246155	0.85265	0.998514	no
AT1G18010.1	1:6199689-6201759	COI0	38600	NOTEST	0.0916217	0.181975	0.989978	0	1	1	no
AT1G18020.1,AT1G18030.1,AT1G18030.2	1:6202234-6209528	COI0	38600	OK	14.8472	13.5117	-0.135985	-0.433043	0.7342	0.998514	no
AT1G05367.1	1:6202234-6209528	COI0	38600	NOTEST	0	0	0	0	1	1	no
AT1G05373.1	1:6219398-6219730	COI0	38600	NOTEST	0	0	0	0	1	1	no
at1g18075	1:6220645-6220841	COI0	38600	NOTEST	0	0	0	0	1	1	no
AT1G18080.1	1:6222200-6224242	COI0	38600	OK	305.746	274.354	-0.156295	-0.644307	0.60785	0.998514	no
AT1G18090.1,AT1G18090.2	1:6224404-6230194	COI0	38600	OK	5.11584	6.28081	0.295981	0.821401	0.5043	0.998514	no
AT1G05383.1	1:6224404-6230194	COI0	38600	NOTEST	0	0	0	0	1	1	no
AT1G18130.1	1:6235894-6238799	COI0	38600	NOTEST	0	0	0	0	1	1	no
AT1G18160.1,AT1G18160.2,AT1G18170.1,AT1G18180.1,AT1G18180.2	1:6248618-6261501	COI0	38600	OK	29.2338	36.2125	0.308853	0.811765	0.45975	0.998514	no
AT1G18193.1	1:6262601-6263258	COI0	38600	NOTEST	0	0	0	0	1	1	no
AT1G05387.1	1:6269848-6270159	COI0	38600	NOTEST	0	0	0	0	1	1	no
AT1G18280.1	1:6294159-6295372	COI0	38600	OK	8.36082	0.544869	-3.93966	-5.1209	0.00695	0.301539	no
AT1G18290.1	1:6297218-6298328	COI0	38600	OK	1.73983	1.099	-0.662757	-0.91912	0.3997	0.998514	no
AT1G18300.1	1:6299668-6301139	COI0	38600	OK	14.7909	17.698	0.258872	0.955856	0.4796	0.998514	no
AT1G18320.1	1:6304359-6305689	COI0	38600	OK	3.32376	5.54347	0.737975	1.59068	0.2899	0.998514	no
AT1G18350.1	1:6315635-6324378	COI0	38600	OK	0.712736	0.247773	-1.52435	-0.509858	0.5596	0.998514	no
AT1G18390.1,AT1G18390.2	1:6325535-6330179	COI0	38600	OK	2.94686	2.10263	-0.486981	-0.908628	0.355	0.998514	no
AT1G18400.1,AT1G18400.2	1:6331397-6333856	COI0	38600	OK	17.2049	9.91242	-0.795511	-2.0908	0.03735	0.700771	no
AT1G18420.1,AT1G18420.2	1:6342939-6345835	COI0	38600	OK	2.2886	1.91196	-0.259415	-0.381655	0.7001	0.998514	no
AT1G18430.1	1:6342939-6345835	COI0	38600	NOTEST	0	0	0	0	1	1	no
AT1G18440.1,AT1G18440.2	1:6345973-6347918	COI0	38600	OK	12.4959	12.2777	-0.0254234	-0.0664766	0.94565	0.998514	no
AT1G18450.1	1:6348047-6352010	COI0	38600	OK	41.8321	39.4949	-0.0829432	-0.333911	0.76785	0.998514	no
AT1G18460.1	1:6352324-6360344	COI0	38600	OK	33.3431	49.2363	0.562337	2.15446	0.09405	0.959004	no
AT1G18480.1,AT1G18485.1	1:6361585-6366263	COI0	38600	OK	29.4475	30.6902	0.0596307	0.225756	0.83355	0.998514	no
AT1G18486.1,AT1G18490.1	1:6366396-6368879	COI0	38600	OK	9.05157	11.4247	0.335912	0.881307	0.3731	0.998514	no
AT1G18500.1	1:6368965-6373080	COI0	38600	OK	49.6343	56.4487	0.185602	0.669245	0.50645	0.998514	no
AT1G18510.1	1:6373264-6374090	COI0	38600	NOTEST	0	0	0	0	1	1	no
AT1G18520.1	1:6374905-6376333	COI0	38600	OK	1.69083	0.185057	-3.19169	-3.46152	0.1179	0.998514	no
AT1G18530.1	1:6376622-6378580	COI0	38600	NOTEST	0	0	0	0	1	1	no
AT1G18560.1	1:6385185-6388180	COI0	38600	OK	3.38837	2.09243	-0.695417	-1.70209	0.13535	0.998514	no
AT1G18570.1	1:6389398-6391386	COI0	38600	OK	10.514	17.1601	0.70675	2.30629	0.03285	0.663947	no
AT1G18580.1	1:6395768-6398274	COI0	38600	OK	10.31	11.0353	0.098089	0.359209	0.76135	0.998514	no
AT1G18590.1	1:6398530-6400029	COI0	38600	OK	59.8301	44.5645	-0.424976	-2.13536	0.13745	0.998514	no
AT1G18600.1	1:6400281-6402794	COI0	38600	OK	15.9878	15.7189	-0.024475	-0.0943478	0.942	0.998514	no
AT1G18610.1,AT1G18610.2	1:6405606-6409532	COI0	38600	OK	11.6093	13.4095	0.207979	0.664575	0.49105	0.998514	no
AT1G18620.1,AT1G18620.2,AT1G18620.3,AT1G18620.4,AT1G18620.5,AT1G18630.1	1:6409654-6418693	COI0	38600	OK	57.1043	64.9003	0.184625	0.657063	0.62745	0.998514	no
AT1G18660.1,AT1G18660.2,AT1G18660.3,AT1G18660.4	1:6418837-6425898	COI0	38600	OK	38.8393	50.8353	0.388314	1.14779	0.23605	0.998514	no
AT1G18690.1,AT1G18690.2,AT1G18690.3,AT1G18690.4	1:6431937-6437236	COI0	38600	OK	3.5748	3.43968	-0.0555885	-0.120348	0.90435	0.998514	no
AT1G18700.1,AT1G18700.2,AT1G18700.3,AT1G18700.4,AT1G18700.5,AT1G18700.6	1:6437473-6444076	COI0	38600	OK	22.4058	22.0856	-0.0207618	-0.0723995	0.9414	0.998514	no
AT1G05413.1	1:6449228-6449681	COI0	38600	NOTEST	0	0	0	0	1	1	no
AT1G18710.1	1:6450584-6453263	COI0	38600	OK	1.82385	2.6633	0.546232	0.961223	0.39065	0.998514	no
AT1G18730.1,AT1G18730.2,AT1G18730.3,AT1G18730.4,AT1G18730.5	1:6457774-6462344	COI0	38600	OK	63.5944	127.006	0.99793	3.3	0.04265	0.740726	no
AT1G18740.1	1:6463848-6465476	COI0	38600	OK	24.5089	22.7556	-0.10708	-0.535653	0.7341	0.998514	no
AT1G18750.1,AT1G18750.2,AT1G18750.3,AT1G18750.4,AT1G18750.5,AT1G18750.6	1:6466666-6469984	COI0	38600	OK	8.7642	10.1409	0.210489	0.553631	0.5652	0.998514	no
AT1G18773.1,AT1G18773.2,AT1G18773.3,AT1G18773.4	1:6474801-6475979	COI0	38600	OK	6.45664	7.26687	0.170551	0.297414	0.75735	0.998514	no
AT1G18820.1	1:6488654-6488735	COI0	38600	NOTEST	0	0	0	0	1	1	no
AT1G18830.1,AT1G18830.2,AT1G18830.3	1:6489232-6494634	COI0	38600	OK	1.00142	0.430019	-1.21958	-1.6567	0.0828	0.923108	no
AT1G05443.1	1:6500049-6500381	COI0	38600	NOTEST	0	0	0	0	1	1	no
AT1G18860.1	1:6508775-6511397	COI0	38600	OK	2.9547	1.1873	-1.31533	-2.14455	0.0433	0.7452	no
AT1G18870.1,AT1G18870.2,AT1G18870.3	1:6515372-6519485	COI0	38600	OK	1.85802	2.97951	0.681309	1.25037	0.20235	0.998514	no
AT1G18880.1	1:6520720-6526075	COI0	38600	OK	14.0427	14.489	0.045137	0.113092	0.9159	0.998514	no
at1g18879	1:6520720-6526075	COI0	38600	NOTEST	0	0	0	0	1	1	no
AT1G05453.1	1:6520720-6526075	COI0	38600	OK	22.4367	29.2681	0.383467	0.540889	0.58335	0.998514	no
AT1G18900.1,AT1G18900.2,AT1G18900.3,AT1G18900.4	1:6528983-6538145	COI0	38600	OK	12.5706	14.4226	0.198282	0.67745	0.5398	0.998514	no
AT1G18940.1	1:6543780-6545802	COI0	38600	NOTEST	0.517341	0.95857	0.889769	0	1	1	no
AT1G18950.1,AT1G18950.2,AT1G18950.3	1:6546176-6552108	COI0	38600	OK	16.5924	19.663	0.244966	0.858776	0.38165	0.998514	no
AT1G18960.1	1:6552751-6554036	COI0	38600	OK	2.28205	2.01815	-0.177297	-0.335604	0.80225	0.998514	no
AT1G18975.1	1:6554495-6558115	COI0	38600	NOTEST	0	0	0	0	1	1	no
AT1G19010.1,AT1G19010.2	1:6565493-6567662	COI0	38600	OK	8.52057	9.64563	0.178926	0.456311	0.6401	0.998514	no
AT1G19020.1,AT1G19025.1,AT1G19025.2,AT1G19025.3	1:6568001-6570939	COI0	38600	OK	30.6086	20.7143	-0.563311	-2.14774	0.11935	0.998514	no
AT1G19040.1	1:6576076-6577413	COI0	38600	NOTEST	0.0904074	0.202432	1.16293	0	1	1	no
AT1G19070.1,AT1G19080.1,AT1G19080.2	1:6584240-6586517	COI0	38600	OK	12.8137	23.2746	0.861066	0.965288	0.2513	0.998514	no
AT1G19086.1	1:6588541-6589338	COI0	38600	NOTEST	0	0	0	0	1	1	no
AT1G19090.1	1:6589834-6592762	COI0	38600	NOTEST	0.0353738	0	#NAME?	0	1	1	no
AT1G19100.1	1:6594882-6601355	COI0	38600	OK	8.93453	8.65008	-0.0466786	-0.167298	0.887	0.998514	no
AT1G19110.1	1:6602104-6606028	COI0	38600	OK	31.0759	33.6816	0.116168	0.466966	0.6748	0.998514	no
AT1G19115.1,AT1G19115.2,AT1G19115.3,AT1G19115.4	1:6606236-6607943	COI0	38600	NOTEST	0.131385	0	#NAME?	0	1	1	no
AT1G19120.1	1:6608114-6612609	COI0	38600	OK	27.2754	27.4485	0.0091255	0.020726	0.9896	0.998514	no
AT1G05467.1	1:6608114-6612609	COI0	38600	OK	1.03946	5.83766	2.48956	1.32054	0.4772	0.998514	no
AT1G19150.1	1:6612629-6613972	COI0	38600	OK	53.0644	102.765	0.953532	3.97681	0.00115	0.0994235	no
AT1G19170.1	1:6616601-6619006	COI0	38600	OK	10.6041	9.3801	-0.17694	-0.523385	0.6051	0.998514	no
AT1G19180.1,AT1G19180.2,AT1G19180.3	1:6621776-6623668	COI0	38600	OK	35.7478	41.7855	0.225147	0.777303	0.43045	0.998514	no
AT1G19190.1	1:6623822-6624977	COI0	38600	OK	1.9593	1.37644	-0.509399	-0.675943	0.45365	0.998514	no
AT1G05487.1	1:6642906-6643519	COI0	38600	NOTEST	0	0	0	0	1	1	no
AT1G19230.1,AT1G19230.2	1:6643941-6653195	COI0	38600	OK	1.90959	0.652931	-1.54826	-1.89596	0.06995	0.881313	no
AT1G19270.1,AT1G19270.2,AT1G19290.1,AT1G19290.2	1:6662416-6669795	COI0	38600	OK	14.7155	15.7015	0.0935665	0.330133	0.7526	0.998514	no
AT1G05497.1	1:6670302-6670780	COI0	38600	NOTEST	0	0	0	0	1	1	no
AT1G19320.1	1:6679280-6680252	COI0	38600	NOTEST	0	0	0	0	1	1	no
AT1G19340.1	1:6684466-6687116	COI0	38600	OK	5.91522	4.89112	-0.274265	-0.856761	0.5335	0.998514	no
AT1G19350.1,AT1G19350.3,AT1G19350.4,AT1G19350.5,AT1G19350.6	1:6688462-6692566	COI0	38600	OK	292.445	263.278	-0.151578	-0.533871	0.65065	0.998514	no
AT1G19373.1	1:6697177-6697253	COI0	38600	NOTEST	0	0	0	0	1	1	no
AT1G19376.1	1:6697437-6697524	COI0	38600	NOTEST	0	0	0	0	1	1	no
AT1G19380.1	1:6697873-6698858	COI0	38600	OK	15.1535	11.7385	-0.368402	-1.32669	0.39305	0.998514	no
AT1G19394.1,AT1G19396.1,AT1G19396.2,AT1G19396.3,AT1G19397.1	1:6709772-6711788	COI0	38600	OK	41.5458	33.0801	-0.328738	-0.927411	0.4875	0.998514	no
AT1G19440.1	1:6728746-6730931	COI0	38600	OK	10.6422	8.69264	-0.291929	-1.0853	0.39935	0.998514	no
AT1G19460.1	1:6738483-6739734	COI0	38600	NOTEST	0.607465	0	#NAME?	0	1	1	no
at1g19464	1:6740499-6740591	COI0	38600	NOTEST	0	0	0	0	1	1	no
AT1G19470.1	1:6741295-6742534	COI0	38600	NOTEST	0.0640804	0	#NAME?	0	1	1	no
AT1G19480.1,AT1G19480.2	1:6744352-6746635	COI0	38600	OK	7.20033	5.62622	-0.355899	-0.886664	0.36915	0.998514	no
AT1G19485.1,AT1G19485.2	1:6746777-6754073	COI0	38600	OK	16.85	17.9745	0.0931977	0.312116	0.7703	0.998514	no
AT1G19520.1,AT1G19520.2	1:6759858-6762847	COI0	38600	OK	22.2913	21.9801	-0.0202873	-0.0711593	0.94335	0.998514	no
AT1G19530.1,AT1G19530.2	1:6763764-6765049	COI0	38600	OK	14.1111	5.34811	-1.39973	-2.73158	0.01185	0.409677	no
AT1G19540.1,AT1G19540.2	1:6765652-6768290	COI0	38600	OK	11.0536	7.43449	-0.572209	-1.88771	0.24905	0.998514	no
AT1G19580.1,AT1G19580.2	1:6774682-6777568	COI0	38600	OK	30.483	28.897	-0.0770858	-0.263167	0.7851	0.998514	no
AT1G19600.1	1:6778886-6781222	COI0	38600	OK	40.0934	44.0558	0.13597	0.632388	0.6359	0.998514	no
AT1G19620.1	1:6783802-6788175	COI0	38600	OK	2.11783	1.29363	-0.711166	-0.879798	0.4324	0.998514	no
AT1G19680.1	1:6805429-6813063	COI0	38600	OK	23.4251	22.1697	-0.0794663	-0.172622	0.87915	0.998514	no
AT1G05507.1	1:6813646-6814005	COI0	38600	NOTEST	0	0	0	0	1	1	no
AT1G19710.1	1:6814703-6822711	COI0	38600	OK	9.73754	9.22063	-0.0786923	-0.074058	0.9547	0.998514	no
AT1G19740.1	1:6824245-6825459	COI0	38600	OK	81.354	99.548	0.291179	1.23344	0.29755	0.998514	no
AT1G19750.1,AT1G19750.2	1:6826829-6830330	COI0	38600	OK	1.27933	0.837423	-0.611364	-0.882203	0.37295	0.998514	no
AT1G19770.1	1:6832324-6836633	COI0	38600	OK	75.0531	73.4568	-0.0310158	-0.151856	0.9119	0.998514	no
AT1G19800.1,AT1G19800.2,AT1G19800.3,AT1G19800.4,AT1G19800.5,AT1G19800.6	1:6846337-6848128	COI0	38600	OK	44.1082	56.0502	0.345673	1.21355	0.21795	0.998514	no
AT1G19830.1	1:6852115-6852945	COI0	38600	OK	4.56056	3.11378	-0.550542	-1.08241	0.38785	0.998514	no
AT1G19850.1,AT1G19850.2	1:6886668-6894752	COI0	38600	OK	18.7872	15.9287	-0.238124	-0.761336	0.4686	0.998514	no
AT1G19890.1	1:6904962-6906028	COI0	38600	NOTEST	0.264955	0	#NAME?	0	1	1	no
AT1G19910.1,AT1G19910.2	1:6913000-6916823	COI0	38600	OK	165.671	120.507	-0.459199	-1.55354	0.2902	0.998514	no
AT1G19930.1	1:6917019-6918138	COI0	38600	NOTEST	0	0	0	0	1	1	no
AT1G19950.1	1:6924090-6926741	COI0	38600	OK	4.20499	3.8293	-0.135022	-0.276032	0.77255	0.998514	no
AT1G19960.1	1:6927735-6928656	COI0	38600	OK	6.37375	2.06129	-1.62859	-3.50608	0.0274	0.611713	no
AT1G19968.1	1:6930260-6930985	COI0	38600	NOTEST	0.320834	0.365039	0.186222	0	1	1	no
AT1G19980.1	1:6933014-6935053	COI0	38600	OK	7.05599	8.73126	0.307341	1.06522	0.4593	0.998514	no
AT1G19990.1	1:6935217-6937666	COI0	38600	OK	19.6595	18.3003	-0.103359	-0.291124	0.77245	0.998514	no
AT1G20015.1	1:6941284-6941373	COI0	38600	NOTEST	0	0	0	0	1	1	no
AT1G20020.1,AT1G20020.2,AT1G20020.3	1:6942624-6945091	COI0	38600	OK	114.852	167.017	0.54022	1.85617	0.06025	0.8389	no
AT1G20030.1,AT1G20030.2	1:6945424-6947344	COI0	38600	OK	1.83996	2.34516	0.350016	0.603825	0.54405	0.998514	no
AT1G20050.1	1:6949042-6959605	COI0	38600	OK	94.6373	75.9487	-0.317383	-1.01949	0.2922	0.998514	no
AT1G20065.1,AT1G20065.2,AT1G20065.3,AT1G20065.4,AT1G20065.5	1:6949042-6959605	COI0	38600	OK	1.08334	1.08273	-0.00080834	-0.00013432	0.99865	0.999142	no
AT1G05533.1	1:6961364-6961574	COI0	38600	NOTEST	6.20306	0	#NAME?	0	1	1	no
AT1G20080.1,AT1G20080.2,AT1G20080.3,AT1G20080.4,AT1G20080.5	1:6962029-6965443	COI0	38600	OK	1.18649	0.12313	-3.26845	-1.95577	0.0295	0.633884	no
AT1G20090.1	1:6966841-6969009	COI0	38600	OK	50.4363	51.5725	0.0321393	0.15761	0.9096	0.998514	no
AT1G20110.1	1:6971423-6975130	COI0	38600	OK	37.6425	32.4019	-0.216286	-0.895684	0.4395	0.998514	no
AT1G20120.1	1:6975338-6977267	COI0	38600	OK	11.7167	7.3399	-0.674738	-1.94071	0.07245	0.889829	no
AT1G20130.1,AT1G20130.2	1:6977752-6980241	COI0	38600	OK	18.7439	9.59795	-0.96562	-3.04397	0.0023	0.156912	no
AT1G20132.1	1:6981263-6983627	COI0	38600	OK	2.06797	0.661615	-1.64415	-2.81718	0.0805	0.915647	no
AT1G20135.1	1:6984041-6985703	COI0	38600	NOTEST	0	0	0	0	1	1	no
AT1G20140.1	1:6986311-6990362	COI0	38600	OK	20.3487	12.9774	-0.64893	-2.45369	0.1181	0.998514	no
AT1G20180.1,AT1G20180.2	1:6996175-6997943	COI0	38600	OK	2.19784	0.931901	-1.23784	-1.57425	0.10905	0.996033	no
AT1G20210.1	1:7004513-7004585	COI0	38600	NOTEST	0	0	0	0	1	1	no
AT1G20230.1	1:7009567-7012107	COI0	38600	OK	1.25222	1.35841	0.11743	0.220996	0.8424	0.998514	no
AT1G20250.1	1:7016515-7016588	COI0	38600	NOTEST	0	0	0	0	1	1	no
AT1G20260.1	1:7016598-7023162	COI0	38600	OK	78.2889	94.1654	0.266389	0.963049	0.36455	0.998514	no
AT1G20280.1	1:7023681-7024439	COI0	38600	NOTEST	0	0	0	0	1	1	no
AT1G20300.1	1:7025547-7031535	COI0	38600	OK	12.4982	9.73269	-0.360808	-1.03035	0.30275	0.998514	no
AT1G20310.1	1:7032069-7033329	COI0	38600	NOTEST	0.205738	0.552036	1.42395	0	1	1	no
AT1G20350.1	1:7043627-7044592	COI0	38600	OK	3.311	2.83245	-0.225219	-0.452223	0.73315	0.998514	no
AT1G05543.1	1:7049115-7049939	COI0	38600	NOTEST	0	0	0	0	1	1	no
AT1G05547.1	1:7050830-7051140	COI0	38600	NOTEST	0	0	0	0	1	1	no
at1g20375	1:7058193-7058310	COI0	38600	NOTEST	0	0	0	0	1	1	no
AT1G20380.1,AT1G20380.2	1:7061441-7065242	COI0	38600	OK	5.0132	4.09656	-0.291319	-0.706667	0.47405	0.998514	no
AT1G20405.1	1:7077115-7077606	COI0	38600	NOTEST	0	0	0	0	1	1	no
AT1G20420.1	1:7082667-7082739	COI0	38600	NOTEST	0	0	0	0	1	1	no
AT1G20460.1	1:7090940-7093593	COI0	38600	OK	12.1288	11.462	-0.081578	-0.300825	0.82975	0.998514	no
AT1G20470.1	1:7094007-7097147	COI0	38600	OK	37.4282	26.3107	-0.508475	-2.13592	0.22915	0.998514	no
AT1G20515.1,AT1G20515.2,AT1G20515.3	1:7106127-7108108	COI0	38600	NOTEST	0.413045	0	#NAME?	0	1	1	no
AT1G20540.1	1:7112610-7118331	COI0	38600	OK	25.9861	25.0649	-0.0520761	-0.224042	0.8715	0.998514	no
AT1G20580.1	1:7128866-7130799	COI0	38600	OK	66.6622	73.9729	0.150128	0.646725	0.5904	0.998514	no
AT1G20600.1	1:7133110-7134454	COI0	38600	NOTEST	0.0835655	0	#NAME?	0	1	1	no
AT1G20620.1,AT1G20620.2,AT1G20620.4,AT1G20620.5,AT1G20620.6,AT1G20620.7	1:7142971-7146540	COI0	38600	OK	825.259	529.694	-0.639688	-1.42834	0.14225	0.998514	no
AT1G20630.1	1:7146635-7150180	COI0	38600	OK	22.5874	20.5275	-0.137959	-0.471966	0.6298	0.998514	no
AT1G20640.1,AT1G20640.2,AT1G20640.3	1:7154409-7160590	COI0	38600	OK	13.9483	11.1454	-0.323649	-0.878489	0.4583	0.998514	no
AT1G20680.1,AT1G20680.2	1:7169308-7170856	COI0	38600	OK	1.41075	0.369707	-1.93201	-1.68881	0.10035	0.977698	no
AT1G20683.1	1:7172514-7172835	COI0	38600	NOTEST	0	0	0	0	1	1	no
AT1G20687.1	1:7173008-7173340	COI0	38600	NOTEST	0	0	0	0	1	1	no
AT1G20690.1	1:7174335-7176647	COI0	38600	OK	3.97634	2.67494	-0.571938	-1.144	0.24715	0.998514	no
AT1G20693.1,AT1G20693.2,AT1G20693.3	1:7176746-7178895	COI0	38600	OK	128.156	61.5737	-1.05751	-3.74694	0.0001	0.0150964	yes
AT1G20696.1,AT1G20696.2,AT1G20696.3,AT1G20696.4,AT1G20696.5	1:7179272-7181574	COI0	38600	OK	130.326	85.0168	-0.616306	-2.18083	0.0254	0.593433	no
AT1G20700.1,AT1G20700.2,AT1G20700.3	1:7182557-7184056	COI0	38600	OK	1.42464	1.51369	0.0874679	0.111691	0.90625	0.998514	no
AT1G20710.1	1:7184484-7185267	COI0	38600	NOTEST	0	0	0	0	1	1	no
AT1G20730.1	1:7194171-7195609	COI0	38600	OK	1.44351	0.0783198	-4.20406	-2.40199	0.1188	0.998514	no
AT1G20735.1	1:7197490-7198681	COI0	38600	NOTEST	0.0612718	0	#NAME?	0	1	1	no
AT1G20740.1,AT1G20740.2	1:7200331-7201737	COI0	38600	NOTEST	0	0	0	0	1	1	no
AT1G20760.1	1:7209297-7214993	COI0	38600	OK	16.0248	18.6069	0.215531	0.67967	0.44535	0.998514	no
AT1G20780.1,AT1G20780.2,AT1G20780.3	1:7217020-7220842	COI0	38600	OK	9.00916	9.06134	0.00833271	0.02606	0.9781	0.998514	no
AT1G05593.1	1:7223759-7224256	COI0	38600	NOTEST	0	0	0	0	1	1	no
AT1G05603.1	1:7225308-7225775	COI0	38600	NOTEST	0	0	0	0	1	1	no
AT1G20810.1,AT1G20810.2,AT1G20816.1	1:7231980-7235128	COI0	38600	OK	39.1389	56.8054	0.537423	1.95557	0.0759	0.901127	no
AT1G20823.1	1:7238692-7239698	COI0	38600	OK	19.2069	13.2255	-0.538297	-1.64785	0.1361	0.998514	no
AT1G20830.1,AT1G20830.2	1:7242895-7248588	COI0	38600	OK	21.8304	25.4746	0.222721	0.644939	0.55085	0.998514	no
AT1G05607.1	1:7242895-7248588	COI0	38600	NOTEST	0	0	0	0	1	1	no
AT1G20850.1	1:7252110-7253747	COI0	38600	OK	33.7891	36.2027	0.0995392	0.371123	0.72295	0.998514	no
AT1G20875.1	1:7259022-7261681	COI0	38600	NOTEST	0	0	0	0	1	1	no
AT1G20900.1	1:7272525-7274072	COI0	38600	OK	5.31219	3.70796	-0.518682	-1.07044	0.23965	0.998514	no
AT1G20920.1,AT1G20920.2,AT1G20920.3,AT1G20920.4,AT1G20920.5,AT1G20920.6,AT1G20920.7,AT1G20925.1	1:7285041-7294746	COI0	38600	OK	22.3343	21.6764	-0.0431366	-0.129725	0.8827	0.998514	no
AT1G20970.1	1:7313900-7319921	COI0	38600	OK	16.763	16.9437	0.0154681	0.0522678	0.9541	0.998514	no
AT1G20980.1	1:7324470-7329441	COI0	38600	OK	42.9589	38.2839	-0.166222	-0.659402	0.55095	0.998514	no
AT1G21000.1,AT1G21000.2	1:7337604-7339452	COI0	38600	OK	87.3243	100.005	0.195622	0.69577	0.4701	0.998514	no
AT1G05617.1	1:7344746-7345128	COI0	38600	NOTEST	0	0	0	0	1	1	no
AT1G21010.1	1:7346155-7347283	COI0	38600	OK	13.1132	19.8865	0.600773	2.18882	0.099	0.975682	no
AT1G21050.2	1:7366589-7368203	COI0	38600	OK	40.9919	24.4922	-0.743018	-3.41433	0.01375	0.44383	no
AT1G05623.1	1:7370610-7370903	COI0	38600	NOTEST	0	0	0	0	1	1	no
AT1G21060.1,AT1G21060.2,AT1G21065.1	1:7371656-7375789	COI0	38600	OK	110.157	156.813	0.509477	1.66798	0.09	0.943902	no
AT1G21090.1,AT1G21090.2	1:7384559-7386580	COI0	38600	OK	12.6596	10.3437	-0.291473	-0.767548	0.43555	0.998514	no
AT1G05633.1	1:7401344-7401549	COI0	38600	NOTEST	0	0	0	0	1	1	no
AT1G21140.1	1:7404327-7405426	COI0	38600	OK	9.22812	6.36474	-0.535934	-1.52602	0.2492	0.998514	no
AT1G21170.1,AT1G21170.2	1:7407930-7419643	COI0	38600	OK	7.84817	7.36903	-0.0908815	-0.195101	0.8415	0.998514	no
AT1G21200.1,AT1G21200.2,AT1G21210.1	1:7421147-7427041	COI0	38600	OK	7.80101	10.0698	0.368307	1.46822	0.35125	0.998514	no
at1g21202	1:7421147-7427041	COI0	38600	NOTEST	0	0	0	0	1	1	no
AT1G21230.1	1:7429894-7432477	COI0	38600	NOTEST	0.0630762	0	#NAME?	0	1	1	no
AT1G21240.1,AT1G21240.2	1:7434234-7436830	COI0	38600	OK	1.19306	0.828951	-0.525314	-0.759002	0.4312	0.998514	no
AT1G21245.1	1:7436841-7437342	COI0	38600	NOTEST	0	0	0	0	1	1	no
AT1G21250.1	1:7439170-7442113	COI0	38600	OK	42.9569	21.6377	-0.989343	-3.72816	0.0007	0.0693825	no
AT1G21270.1	1:7444748-7448483	COI0	38600	OK	15.096	4.57748	-1.72155	-5.35944	5e-05	0.00838689	yes
AT1G21313.1	1:7453244-7455009	COI0	38600	OK	8.70995	7.15987	-0.282731	-0.201919	0.8405	0.998514	no
AT1G21323.1	1:7466693-7467359	COI0	38600	NOTEST	0	0	0	0	1	1	no
AT1G05653.1	1:7471089-7471300	COI0	38600	NOTEST	0	0	0	0	1	1	no
AT1G05657.1	1:7473010-7473358	COI0	38600	NOTEST	0	0	0	0	1	1	no
AT1G21340.1	1:7476021-7476899	COI0	38600	NOTEST	0.307326	0	#NAME?	0	1	1	no
AT1G21360.1,AT1G21360.2,AT1G21360.3	1:7481183-7483513	COI0	38600	OK	2.91796	2.50904	-0.217826	-0.32483	0.74365	0.998514	no
AT1G21370.1,AT1G21370.2	1:7483780-7488780	COI0	38600	OK	12.624	14.1569	0.165332	0.433682	0.7688	0.998514	no
AT1G05663.1	1:7490991-7491645	COI0	38600	NOTEST	0	0	0	0	1	1	no
AT1G21395.1	1:7491964-7492351	COI0	38600	NOTEST	0	0	0	0	1	1	no
AT1G21400.2,AT1G21400.3,AT1G21400.4,AT1G21400.5,AT1G21400.6	1:7493212-7496741	COI0	38600	OK	49.6328	68.0627	0.45557	1.61839	0.09595	0.964678	no
AT1G21410.1,AT1G21410.2	1:7496997-7499616	COI0	38600	OK	24.1653	33.8525	0.486323	1.64037	0.0964	0.967385	no
AT1G21430.1	1:7500844-7504275	COI0	38600	NOTEST	0	0	0	0	1	1	no
AT1G21450.1	1:7508700-7513481	COI0	38600	OK	29.5086	32.5363	0.140916	0.554454	0.66805	0.998514	no
AT1G21560.1,AT1G21560.2,AT1G21560.3,AT1G21560.4,AT1G21560.5,AT1G21560.6	1:7554670-7557112	COI0	38600	OK	20.0145	18.6486	-0.101979	-0.319465	0.74485	0.998514	no
AT1G21610.1,AT1G21610.2,AT1G21610.3,AT1G21610.4,AT1G21610.5,AT1G21610.6	1:7570844-7578963	COI0	38600	OK	14.2189	13.8905	-0.0337095	-0.0702192	0.9428	0.998514	no
AT1G21620.1	1:7579128-7580171	COI0	38600	NOTEST	0	0	0	0	1	1	no
AT1G21630.1,AT1G21630.2,AT1G21630.3,AT1G21630.4	1:7581007-7588153	COI0	38600	OK	22.3047	27.1721	0.284777	1.00296	0.3106	0.998514	no
AT1G21640.1,AT1G21640.2	1:7588413-7604229	COI0	38600	OK	33.8213	42.2474	0.320929	1.01268	0.3146	0.998514	no
AT1G05683.1	1:7604409-7604655	COI0	38600	NOTEST	0	0	0	0	1	1	no
AT1G21660.1	1:7605619-7609223	COI0	38600	OK	23.8252	24.5891	0.0455306	0.186618	0.87375	0.998514	no
AT1G21670.1	1:7610240-7612721	COI0	38600	OK	9.74769	14.1348	0.536121	1.61085	0.079	0.911643	no
AT1G21680.1	1:7612833-7615374	COI0	38600	OK	24.6911	30.3049	0.295561	0.884887	0.28675	0.998514	no
AT1G21690.1,AT1G21690.2,AT1G21690.3,AT1G21690.4	1:7615504-7618628	COI0	38600	OK	24.3575	23.6162	-0.0445915	-0.136149	0.88955	0.998514	no
AT1G21695.1	1:7618861-7619919	COI0	38600	OK	1.32135	1.22456	-0.109744	-0.164187	0.8996	0.998514	no
AT1G21710.1,AT1G21720.1	1:7624319-7628290	COI0	38600	OK	98.127	86.2976	-0.18533	-0.659873	0.5098	0.998514	no
AT1G21722.1	1:7628455-7629364	COI0	38600	NOTEST	0	0	0	0	1	1	no
AT1G21730.1	1:7630106-7636658	COI0	38600	OK	6.63912	6.9398	0.0639021	0.192481	0.83685	0.998514	no
AT1G21740.1	1:7640905-7645240	COI0	38600	OK	4.066	3.33078	-0.287748	-0.791606	0.41935	0.998514	no
AT1G21750.1,AT1G21750.2	1:7645609-7648855	COI0	38600	OK	73.0636	74.8342	0.0345443	0.122252	0.8988	0.998514	no
AT1G21760.1,AT1G21760.2,AT1G21780.1,AT1G21780.2	1:7649193-7654014	COI0	38600	OK	48.1741	52.8949	0.13487	0.46463	0.64455	0.998514	no
AT1G21790.1	1:7654087-7655981	COI0	38600	OK	7.63882	8.75005	0.195942	0.615839	0.6321	0.998514	no
AT1G21835.1	1:7665663-7665936	COI0	38600	NOTEST	0	0	0	0	1	1	no
AT1G21840.1,AT1G21840.2	1:7666413-7667794	COI0	38600	OK	7.40012	5.71785	-0.372076	-0.700085	0.48245	0.998514	no
AT1G21864.1	1:7675501-7675971	COI0	38600	NOTEST	0	0	0	0	1	1	no
AT1G21866.1	1:7677498-7677959	COI0	38600	NOTEST	0	0	0	0	1	1	no
AT1G21870.1	1:7678207-7679843	COI0	38600	NOTEST	0	0	0	0	1	1	no
AT1G21880.1,AT1G21880.2	1:7680389-7685662	COI0	38600	OK	16.5631	19.2277	0.215216	0.759429	0.53085	0.998514	no
AT1G21910.1	1:7696426-7697831	COI0	38600	OK	10.0557	15.2109	0.597096	2.40739	0.1236	0.998514	no
AT1G21930.1	1:7712818-7714459	COI0	38600	OK	45.5202	32.8062	-0.472539	-2.00678	0.1854	0.998514	no
AT1G21960.1	1:7725971-7726586	COI0	38600	NOTEST	0.620761	0	#NAME?	0	1	1	no
AT1G21980.1	1:7734660-7738772	COI0	38600	OK	27.3515	23.2574	-0.233928	-0.960046	0.4027	0.998514	no
AT1G05697.1	1:7739695-7740012	COI0	38600	NOTEST	0	0	0	0	1	1	no
AT1G22000.1	1:7744093-7745744	COI0	38600	NOTEST	0.294315	0.170505	-0.787542	0	1	1	no
AT1G22010.1	1:7749570-7750062	COI0	38600	OK	2.1529	0.337123	-2.67493	-2.90079	0.13935	0.998514	no
AT1G22020.1,AT1G22020.2	1:7754280-7758029	COI0	38600	OK	17.1325	19.9239	0.217764	0.746237	0.44215	0.998514	no
AT1G22040.1	1:7767923-7770216	COI0	38600	OK	16.8136	16.1449	-0.0585498	-0.258674	0.85145	0.998514	no
AT1G22050.1	1:7771658-7781712	COI0	38600	OK	12.137	13.1847	0.119446	0.198958	0.8941	0.998514	no
AT1G05707.1	1:7771658-7781712	COI0	38600	NOTEST	0	0.391282	inf	0	1	1	no
AT1G22065.1	1:7785707-7786477	COI0	38600	OK	13.9159	5.98597	-1.21707	-3.69922	0.0329	0.664273	no
AT1G22070.1	1:7789132-7792139	COI0	38600	OK	13.3864	8.49312	-0.656398	-2.26679	0.0551	0.816242	no
AT1G22090.1	1:7795707-7797425	COI0	38600	OK	0.955092	0.35581	-1.42453	-1.7196	0.229	0.998514	no
AT1G05717.1	1:7814472-7815722	COI0	38600	NOTEST	0	0	0	0	1	1	no
AT1G22150.1,AT1G22150.2,AT1G22150.3,AT1G22150.4	1:7817608-7821576	COI0	38600	OK	2.6397	0.917898	-1.52397	-2.41525	0.01935	0.526699	no
AT1G22160.1	1:7823065-7823971	COI0	38600	OK	70.5991	95.3474	0.433543	1.973	0.132	0.998514	no
AT1G22170.1,AT1G22170.2	1:7826267-7830424	COI0	38600	OK	6.44442	6.12202	-0.0740432	-0.185286	0.89125	0.998514	no
AT1G05727.1	1:7826267-7830424	COI0	38600	OK	0.96651	0	#NAME?	#NAME?	0.23795	0.998514	no
AT1G22190.1	1:7835780-7837411	COI0	38600	OK	58.0577	60.3586	0.0560723	0.236606	0.8375	0.998514	no
AT1G22210.1	1:7841431-7844056	COI0	38600	NOTEST	0.239699	0	#NAME?	0	1	1	no
AT1G22220.1	1:7846458-7847836	COI0	38600	OK	2.35259	1.38061	-0.768947	-1.29854	0.25605	0.998514	no
AT1G22230.1	1:7849775-7851164	COI0	38600	OK	1.04557	0.972507	-0.104516	-0.141617	0.89385	0.998514	no
AT1G22240.1	1:7852903-7855213	COI0	38600	NOTEST	0.640073	0	#NAME?	0	1	1	no
AT1G22250.1	1:7858863-7865263	COI0	38600	OK	1.27013	1.08187	-0.231455	-0.256376	0.85895	0.998514	no
AT1G22270.1	1:7865434-7866176	COI0	38600	OK	32.2396	26.7337	-0.270174	-0.994041	0.42925	0.998514	no
AT1G22275.1,AT1G22275.2,AT1G22275.3	1:7867066-7872715	COI0	38600	OK	0.957418	0.637286	-0.587209	-0.891398	0.35575	0.998514	no
AT1G05737.1	1:7872849-7873056	COI0	38600	NOTEST	0	0	0	0	1	1	no
AT1G22280.1,AT1G22280.2,AT1G22280.3	1:7873866-7876018	COI0	38600	OK	45.8996	45.8977	-5.9766e-05	-0.000210727	0.99945	0.999467	no
AT1G22330.1	1:7886322-7889534	COI0	38600	OK	3.60722	2.4059	-0.584307	-1.08061	0.24745	0.998514	no
AT1G22410.1	1:7911842-7915004	COI0	38600	OK	77.5805	109.855	0.501833	1.91001	0.0825	0.922734	no
AT1G22430.1,AT1G22430.2,AT1G22430.3,AT1G22430.4,AT1G22430.5	1:7919076-7921893	COI0	38600	OK	40.8917	56.6899	0.471283	1.64015	0.09225	0.953029	no
AT1G22440.1,AT1G22450.1	1:7922275-7930657	COI0	38600	OK	70.209	73.731	0.0706136	0.355722	0.7994	0.998514	no
AT1G22500.1	1:7949475-7952832	COI0	38600	OK	15.0779	15.2233	0.0138442	0.0368953	0.97055	0.998514	no
AT1G05757.1	1:7949475-7952832	COI0	38600	NOTEST	0	0	0	0	1	1	no
AT1G22540.1	1:7963812-7966436	COI0	38600	OK	6.00353	4.63996	-0.371699	-1.21596	0.374	0.998514	no
AT1G22590.1,AT1G22590.2	1:7981721-7984334	COI0	38600	OK	20.2041	23.2043	0.199747	0.526715	0.5841	0.998514	no
AT1G22610.1	1:7994165-8002989	COI0	38600	OK	22.1824	21.347	-0.0553829	-0.162984	0.87115	0.998514	no
AT1G22630.1	1:8003222-8004304	COI0	38600	OK	126.361	141.079	0.158955	1.01814	0.57005	0.998514	no
AT1G22640.1,AT1G22640.2,AT1G22640.3	1:8006063-8007465	COI0	38600	OK	58.6612	63.6867	0.118585	0.411862	0.6788	0.998514	no
AT1G22660.2,AT1G22660.3,AT1G22660.4,AT1G22660.5	1:8017280-8023516	COI0	38600	OK	11.6211	11.9089	0.0352917	0.11495	0.90875	0.998514	no
AT1G22690.1,AT1G22690.2,AT1G22690.3	1:8027125-8030136	COI0	38600	OK	116.704	95.7729	-0.28516	-1.09755	0.54465	0.998514	no
AT1G05763.1	1:8027125-8030136	COI0	38600	NOTEST	0	0	0	0	1	1	no
AT1G22730.1	1:8046072-8049039	COI0	38600	OK	18.0987	17.192	-0.0741431	-0.290116	0.79545	0.998514	no
AT1G22740.1,AT1G22750.1,AT1G22750.2,AT1G22750.3,AT1G22750.4	1:8049089-8052930	COI0	38600	OK	85.9915	109.813	0.35278	1.21131	0.22375	0.998514	no
AT1G22760.1	1:8055324-8059060	COI0	38600	OK	5.83104	0.110657	-5.71958	-5.52221	0.02555	0.595048	no
AT1G22770.1	1:8061750-8067790	COI0	38600	OK	10.8611	10.0631	-0.110104	-0.422768	0.70305	0.998514	no
AT1G22780.1,AT1G22790.1,AT1G22790.2	1:8067863-8071593	COI0	38600	OK	294.478	261.977	-0.168718	-0.875929	0.5651	0.998514	no
AT1G22800.1	1:8071788-8075037	COI0	38600	OK	12.8561	11.4353	-0.168954	-0.513928	0.6183	0.998514	no
AT1G22830.1,AT1G22830.2	1:8075995-8079137	COI0	38600	OK	2.73589	2.75779	0.0115025	0.0237646	0.97895	0.998514	no
AT1G22840.1,AT1G22840.2	1:8079286-8082882	COI0	38600	OK	209.718	153.16	-0.453411	-1.26357	0.366	0.998514	no
AT1G05777.1	1:8079286-8082882	COI0	38600	NOTEST	0	0	0	0	1	1	no
AT1G22860.1,AT1G22870.1,AT1G22870.2,AT1G22870.3,AT1G22870.4	1:8083183-8094505	COI0	38600	OK	17.5689	17.3598	-0.0172778	-0.0665786	0.94825	0.998514	no
AT1G22880.1,AT1G22880.2,AT1G22880.3	1:8095448-8097790	COI0	38600	OK	5.4354	5.04177	-0.108456	-0.288451	0.7658	0.998514	no
AT1G22882.1,AT1G22885.1,AT1G22885.2	1:8098391-8102500	COI0	38600	OK	31.2469	26.9608	-0.21285	-0.503665	0.58845	0.998514	no
AT1G22890.1	1:8102727-8103588	COI0	38600	OK	21.1679	20.3337	-0.0580083	-0.242271	0.89075	0.998514	no
AT1G22910.1,AT1G22910.2,AT1G22910.3,AT1G22910.4	1:8104992-8108361	COI0	38600	OK	11.5276	11.9893	0.0566638	0.170828	0.8646	0.998514	no
AT1G22930.1,AT1G22930.2	1:8117285-8122151	COI0	38600	OK	96.6542	100.56	0.0571511	0.183896	0.851	0.998514	no
AT1G22940.1	1:8122338-8127286	COI0	38600	OK	15.3164	16.1496	0.0764223	0.226224	0.84585	0.998514	no
AT1G22990.1,AT1G22990.2	1:8139113-8140233	COI0	38600	OK	3.15413	3.40048	0.108498	0.161333	0.87075	0.998514	no
AT1G23000.1,AT1G23000.2	1:8143226-8145174	COI0	38600	OK	5.91453	6.05634	0.0341841	0.091523	0.9266	0.998514	no
AT1G23010.1	1:8147117-8153796	COI0	38600	OK	2.95956	4.56565	0.625437	0.797294	0.347	0.998514	no
AT1G23030.1	1:8156503-8159185	COI0	38600	OK	16.0573	19.8352	0.304829	1.09679	0.29665	0.998514	no
AT1G23037.1	1:8162413-8163149	COI0	38600	NOTEST	0	0	0	0	1	1	no
AT1G23040.1,AT1G23040.2,AT1G23040.3	1:8164781-8166716	COI0	38600	OK	26.5898	24.9523	-0.0917002	-0.281172	0.7748	0.998514	no
AT1G23100.1	1:8195775-8198331	COI0	38600	OK	26.7389	23.3322	-0.196615	-0.665887	0.66625	0.998514	no
AT1G05787.1	1:8195775-8198331	COI0	38600	OK	2.25383	0.585804	-1.94389	-0.731076	0.48165	0.998514	no
AT1G23120.2	1:8198585-8199616	COI0	38600	OK	11.8328	6.73731	-0.812543	-1.68167	0.0943	0.960057	no
AT1G23130.1	1:8200320-8201246	COI0	38600	OK	860.519	785.789	-0.131064	-0.443208	0.70315	0.998514	no
AT1G23145.1	1:8203932-8204318	COI0	38600	NOTEST	0	0	0	0	1	1	no
AT1G23147.1	1:8205871-8206243	COI0	38600	NOTEST	0	0	0	0	1	1	no
AT1G23150.1	1:8206548-8207618	COI0	38600	OK	17.448	5.39705	-1.69282	-6.47006	0.006	0.277717	no
AT1G23160.1	1:8209225-8211486	COI0	38600	NOTEST	0.114975	0	#NAME?	0	1	1	no
AT1G23170.1,AT1G23170.2,AT1G23180.1,AT1G23180.2	1:8212555-8219641	COI0	38600	OK	14.2334	19.1989	0.431749	1.43303	0.14245	0.998514	no
AT1G23190.1	1:8219807-8224547	COI0	38600	OK	60.1559	65.8373	0.130198	0.536416	0.6419	0.998514	no
AT1G23200.1	1:8227132-8229661	COI0	38600	OK	2.83123	3.0948	0.128416	0.253144	0.77585	0.998514	no
AT1G23201.2	1:8230046-8230978	COI0	38600	NOTEST	0.128891	0	#NAME?	0	1	1	no
AT1G23210.1	1:8240144-8242261	COI0	38600	NOTEST	0.202772	0.0492657	-2.0412	0	1	1	no
AT1G23220.1,AT1G23230.1,AT1G23230.2,AT1G23230.3	1:8242368-8251937	COI0	38600	OK	25.2876	33.5746	0.408942	1.16976	0.2945	0.998514	no
AT1G23290.1	1:8262924-8266048	COI0	38600	NOTEST	0	0	0	0	1	1	no
AT1G05807.1	1:8304659-8304901	COI0	38600	NOTEST	0	0	0	0	1	1	no
AT1G23410.1	1:8311983-8315876	COI0	38600	OK	18.5657	17.6641	-0.0718204	-0.0781752	0.9345	0.998514	no
AT1G23420.2	1:8317296-8319491	COI0	38600	OK	1.42042	0.997309	-0.5102	-0.598671	0.5386	0.998514	no
AT1G23440.1,AT1G23440.2,AT1G23440.3	1:8321610-8324497	COI0	38600	OK	43.8058	42.038	-0.0594288	-0.202161	0.8359	0.998514	no
AT1G23450.1	1:8324697-8326697	COI0	38600	NOTEST	0.470572	0.20059	-1.23017	0	1	1	no
AT1G23460.1,AT1G23460.2	1:8326746-8329782	COI0	38600	OK	5.46036	6.47761	0.246467	0.634829	0.5176	0.998514	no
AT1G23465.1	1:8329923-8331104	COI0	38600	OK	4.07916	3.73056	-0.128879	-0.292385	0.87	0.998514	no
AT1G23480.1,AT1G23480.2,AT1G23480.3,AT1G23480.4	1:8332861-8336414	COI0	38600	OK	6.38586	7.73153	0.275874	0.707387	0.47635	0.998514	no
AT1G23490.1	1:8336592-8338827	COI0	38600	OK	185.516	156.823	-0.242406	-1.00382	0.3958	0.998514	no
AT1G23500.1	1:8339667-8341072	COI0	38600	NOTEST	0.106881	0	#NAME?	0	1	1	no
AT1G23530.1	1:8345594-8346733	COI0	38600	OK	3.0158	2.75824	-0.128796	-0.230257	0.824	0.998514	no
AT1G23550.1	1:8350727-8354619	COI0	38600	OK	6.79233	5.45805	-0.315521	-0.797232	0.54955	0.998514	no
AT1G05823.1	1:8363894-8364276	COI0	38600	NOTEST	0	0	0	0	1	1	no
AT1G23710.1	1:8385187-8386522	COI0	38600	OK	16.7942	16.744	-0.00431383	-0.0145414	0.9929	0.998514	no
AT1G23720.2,AT1G23720.3,AT1G23720.4	1:8388296-8391623	COI0	38600	NOTEST	0.418701	0.174386	-1.26364	0	1	1	no
AT1G23730.1,AT1G23730.2	1:8395465-8399836	COI0	38600	OK	25.0439	9.42622	-1.40971	-1.04609	0.38545	0.998514	no
AT1G23750.1,AT1G23750.2	1:8400055-8401550	COI0	38600	OK	6.72113	6.60829	-0.0244274	-0.0484632	0.95945	0.998514	no
AT1G23760.1	1:8401807-8404301	COI0	38600	OK	1.9593	1.16498	-0.750031	-1.24634	0.17035	0.998514	no
AT1G23790.1	1:8409944-8414886	COI0	38600	OK	3.06621	2.82537	-0.118016	-0.191093	0.8501	0.998514	no
AT1G23810.1	1:8417494-8418566	COI0	38600	OK	1.16673	0.379286	-1.62111	-2.07402	0.2531	0.998514	no
AT1G23820.1,AT1G23820.2	1:8420264-8424088	COI0	38600	OK	100.292	122.834	0.292503	1.28097	0.303	0.998514	no
AT1G23870.1,AT1G23880.1,AT1G23880.2	1:8432178-8440866	COI0	38600	OK	16.3517	41.2803	1.33602	4.77649	5e-05	0.00838689	yes
AT1G23900.1,AT1G23900.2,AT1G23900.3	1:8441072-8447681	COI0	38600	OK	19.9209	19.6597	-0.0190421	-0.0673002	0.9459	0.998514	no
AT1G23915.1	1:8457658-8458946	COI0	38600	NOTEST	0.139725	0	#NAME?	0	1	1	no
AT1G23935.1,AT1G23935.2,AT1G23935.3	1:8461756-8471417	COI0	38600	OK	1.82031	1.35933	-0.421292	-0.547119	0.62265	0.998514	no
AT1G23985.1	1:8484702-8487558	COI0	38600	NOTEST	0.631028	0.531929	-0.246471	0	1	1	no
AT1G24030.1,AT1G24030.2,AT1G24030.3,AT1G24030.4,AT1G24030.5,AT1G24030.6	1:8503216-8506837	COI0	38600	OK	3.39468	1.8054	-0.910957	-0.991576	0.3222	0.998514	no
AT1G24050.1	1:8506967-8508909	COI0	38600	OK	93.4958	82.0403	-0.18857	-0.954089	0.5028	0.998514	no
AT1G24068.1	1:8515505-8515971	COI0	38600	NOTEST	0	0	0	0	1	1	no
AT1G24090.1,AT1G24095.1,AT1G24095.2	1:8520442-8524929	COI0	38600	OK	6.12625	6.19866	0.0169508	0.0328216	0.97345	0.998514	no
AT1G24110.1	1:8527713-8529018	COI0	38600	NOTEST	0.0663043	0	#NAME?	0	1	1	no
AT1G24145.1	1:8540837-8542053	COI0	38600	OK	6.07409	10.8145	0.832227	2.41161	0.0797	0.913989	no
AT1G24147.1	1:8542211-8543545	COI0	38600	OK	6.20742	5.47742	-0.180498	-0.459829	0.7377	0.998514	no
AT1G24148.1,AT1G24148.2	1:8544247-8545590	COI0	38600	OK	24.2332	21.1541	-0.196046	-0.581415	0.5529	0.998514	no
AT1G24150.2	1:8549190-8552086	COI0	38600	OK	4.17814	4.56075	0.126411	0.327937	0.7379	0.998514	no
AT1G24159.1	1:8552774-8556750	COI0	38600	NOTEST	0	0	0	0	1	1	no
AT1G24240.1,AT1G24240.2	1:8586334-8588180	COI0	38600	OK	10.532	7.68143	-0.455337	-0.967822	0.3299	0.998514	no
AT1G24256.1	1:8592077-8592989	COI0	38600	NOTEST	0	0	0	0	1	1	no
AT1G05863.1	1:8598623-8598990	COI0	38600	NOTEST	0	0	0	0	1	1	no
AT1G24265.1,AT1G24265.2,AT1G24265.3	1:8600390-8603913	COI0	38600	OK	5.49833	4.52612	-0.280719	-0.620948	0.52815	0.998514	no
AT1G24280.1	1:8609337-8614283	COI0	38600	OK	8.24043	7.8123	-0.0769726	-0.229759	0.83965	0.998514	no
AT1G05873.1	1:8609337-8614283	COI0	38600	OK	5.62876	2.88505	-0.964222	-0.984555	0.31785	0.998514	no
AT1G24310.1	1:8624013-8631027	COI0	38600	OK	19.2285	17.2859	-0.153646	-0.503998	0.61505	0.998514	no
AT1G24330.1,AT1G24330.2	1:8631205-8635055	COI0	38600	OK	1.84982	2.59233	0.486863	1.02031	0.301	0.998514	no
AT1G24340.1	1:8635186-8643503	COI0	38600	OK	14.2345	19.4746	0.452194	0.871198	0.4946	0.998514	no
AT1G24360.1	1:8635186-8643503	COI0	38600	OK	98.9113	93.0675	-0.0878587	-0.257056	0.7844	0.998514	no
AT1G24380.1	1:8646055-8647674	COI0	38600	NOTEST	0	0.101267	inf	0	1	1	no
AT1G24390.1	1:8648098-8648995	COI0	38600	NOTEST	0	0	0	0	1	1	no
AT1G05887.1	1:8649779-8650056	COI0	38600	NOTEST	0	0	0	0	1	1	no
AT1G05897.1	1:8650621-8650899	COI0	38600	NOTEST	0	0	0	0	1	1	no
AT1G24405.1	1:8654944-8655662	COI0	38600	NOTEST	1.01785	1.03289	0.0211637	0	1	1	no
AT1G24420.1,AT1G24420.2	1:8656020-8657997	COI0	38600	NOTEST	0	0	0	0	1	1	no
AT1G05903.1	1:8659677-8660351	COI0	38600	NOTEST	0	0	0	0	1	1	no
AT1G24440.1,AT1G24440.2	1:8661837-8664007	COI0	38600	OK	13.1896	15.241	0.208561	0.572951	0.56755	0.998514	no
AT1G24450.1	1:8664096-8665569	COI0	38600	OK	23.1156	16.4077	-0.494488	-2.22754	0.17255	0.998514	no
AT1G24460.1,AT1G24460.2	1:8665873-8672651	COI0	38600	OK	16.4614	18.8812	0.197858	0.714254	0.46195	0.998514	no
AT1G24470.1	1:8673913-8677228	COI0	38600	OK	1.96669	1.18346	-0.732761	-1.11555	0.3323	0.998514	no
AT1G24485.1,AT1G24485.2,AT1G24485.3,AT1G24485.4	1:8678857-8681894	COI0	38600	NOTEST	0	0	0	0	1	1	no
AT1G24490.1,AT1G24490.2	1:8682194-8688247	COI0	38600	OK	31.4886	40.1939	0.352147	0.60974	0.5833	0.998514	no
AT1G24520.1	1:8688562-8689268	COI0	38600	OK	4.51762	0.170747	-4.72563	-3.94965	0.1188	0.998514	no
AT1G24530.1	1:8692629-8694705	COI0	38600	OK	18.8643	11.9604	-0.65739	-2.42939	0.03635	0.691707	no
AT1G24540.1	1:8699649-8705879	COI0	38600	OK	0.87597	0	#NAME?	#NAME?	0.11465	0.998514	no
AT1G24560.1	1:8699649-8705879	COI0	38600	OK	24.0994	24.6361	0.0317802	0.110647	0.91015	0.998514	no
AT1G24570.1,AT1G24570.2	1:8706799-8709782	COI0	38600	NOTEST	0.399245	0.0616646	-2.69476	0	1	1	no
AT1G24580.1	1:8709940-8710824	COI0	38600	OK	3.09896	5.3259	0.781243	1.97616	0.2576	0.998514	no
AT1G24600.1	1:8720308-8722825	COI0	38600	OK	20.2659	8.17756	-1.30932	-2.61531	0.34025	0.998514	no
AT1G24650.1	1:8734569-8737315	COI0	38600	NOTEST	0.0344057	0	#NAME?	0	1	1	no
AT1G24660.1	1:8740204-8740469	COI0	38600	NOTEST	0	0	0	0	1	1	no
AT1G24706.1,AT1G24706.2,AT1G24706.3,AT1G24706.4,AT1G24706.5,AT1G24706.6,AT1G24706.7,AT1G24706.8,AT1G24706.9	1:8741835-8755604	COI0	38600	OK	18.527	23.2123	0.325258	1.15578	0.24225	0.998514	no
AT1G24735.1,AT1G24735.2,AT1G24735.3	1:8757863-8763469	COI0	38600	OK	4.82918	5.09225	0.0765262	0.100318	0.9508	0.998514	no
AT1G24793.1,AT1G24793.2,AT1G24800.1	1:8767561-8773535	COI0	38600	OK	0.874829	0.75396	-0.214513	-0.287311	0.80595	0.998514	no
AT1G24880.2,AT1G24880.3	1:8774996-8778072	COI0	38600	OK	1.8861	2.52987	0.423658	0.519298	0.58335	0.998514	no
AT1G24851.1	1:8778279-8780257	COI0	38600	NOTEST	0	0	0	0	1	1	no
AT1G24881.1	1:8784035-8785634	COI0	38600	NOTEST	0	0	0	0	1	1	no
AT1G25025.1	1:8800807-8801584	COI0	38600	NOTEST	0	0	0	0	1	1	no
AT1G25054.1	1:8804488-8806361	COI0	38600	NOTEST	0	0	0	0	1	1	no
AT1G25055.1	1:8806606-8808156	COI0	38600	NOTEST	0	0	0	0	1	1	no
AT1G25112.1	1:8811732-8815962	COI0	38600	NOTEST	0	0	0	0	1	1	no
AT1G25141.1	1:8817677-8818395	COI0	38600	OK	5.40035	8.55613	0.663905	2.06616	0.3014	0.998514	no
AT1G25145.1	1:8818866-8820736	COI0	38600	NOTEST	0	0	0	0	1	1	no
AT1G25150.1,AT1G25150.2	1:8821007-8824821	COI0	38600	NOTEST	0	0	0	0	1	1	no
AT1G25180.1	1:8826982-8831390	COI0	38600	OK	1.56298	1.5547	-0.0076643	-0.0165766	0.98925	0.998514	no
AT1G25210.1,AT1G25210.2	1:8833244-8835235	COI0	38600	NOTEST	0	0	0	0	1	1	no
AT1G25211.1	1:8835385-8839609	COI0	38600	NOTEST	0	0	0	0	1	1	no
AT1G05933.1	1:8835385-8839609	COI0	38600	NOTEST	0	0	0	0	1	1	no
AT1G05937.1	1:8843773-8844366	COI0	38600	NOTEST	0.238	0	#NAME?	0	1	1	no
AT1G25240.2	1:8845141-8846726	COI0	38600	NOTEST	0.226901	0	#NAME?	0	1	1	no
AT1G25250.1,AT1G25250.2,AT1G25250.3	1:8849005-8851790	COI0	38600	OK	1.17402	1.00358	-0.226294	-0.298724	0.76125	0.998514	no
AT1G05953.1	1:8852647-8853171	COI0	38600	NOTEST	0	0	0	0	1	1	no
AT1G25270.1	1:8857725-8859909	COI0	38600	NOTEST	0	0	0	0	1	1	no
AT1G25275.1,AT1G25275.2,AT1G25275.3	1:8860526-8861522	COI0	38600	OK	65.35	53.0486	-0.300872	-0.918852	0.3468	0.998514	no
AT1G25277.1,AT1G25277.2	1:8861733-8862797	COI0	38600	OK	4.29266	5.32858	0.311878	0.5354	0.5849	0.998514	no
AT1G25280.1,AT1G25280.2,AT1G25280.3	1:8863767-8866894	COI0	38600	OK	24.9872	24.273	-0.0418311	-0.145802	0.88365	0.998514	no
AT1G25290.1,AT1G25290.2	1:8867023-8869289	COI0	38600	OK	10.1299	9.86018	-0.0389294	-0.101241	0.91565	0.998514	no
AT1G25300.1	1:8871567-8872386	COI0	38600	NOTEST	0.267952	0	#NAME?	0	1	1	no
AT1G05957.1	1:8876311-8876558	COI0	38600	NOTEST	0	0	0	0	1	1	no
AT1G25320.1	1:8877789-8882100	COI0	38600	OK	2.37098	2.5821	0.123059	0.311129	0.81355	0.998514	no
AT1G25340.1,AT1G25340.2,AT1G25340.3	1:8885019-8886777	COI0	38600	NOTEST	0.187656	0	#NAME?	0	1	1	no
AT1G25360.1	1:8894379-8897124	COI0	38600	OK	1.37822	1.67908	0.284862	0.589524	0.60635	0.998514	no
AT1G25380.1,AT1G25380.2	1:8900109-8909334	COI0	38600	OK	20.8396	18.6556	-0.159717	-0.461527	0.7056	0.998514	no
AT1G25420.1,AT1G25420.2,AT1G25420.3,AT1G25420.4	1:8915914-8918267	COI0	38600	OK	26.1116	22.0731	-0.242403	-0.761934	0.4364	0.998514	no
AT1G25422.1	1:8918788-8919892	COI0	38600	NOTEST	0	0	0	0	1	1	no
AT1G25425.1	1:8922415-8923879	COI0	38600	OK	3.88873	3.7323	-0.0592357	-0.19593	0.9228	0.998514	no
AT1G05967.1	1:8941001-8941202	COI0	38600	NOTEST	0	0	0	0	1	1	no
AT1G25460.1	1:8942712-8944442	COI0	38600	NOTEST	0.282658	0.240876	-0.230768	0	1	1	no
AT1G25480.1	1:8948231-8951031	COI0	38600	OK	7.3781	7.18565	-0.0381314	-0.126765	0.9198	0.998514	no
AT1G25490.1	1:8951161-8955160	COI0	38600	OK	63.5612	72.1569	0.182992	0.911176	0.50775	0.998514	no
AT1G25520.1	1:8962086-8967562	COI0	38600	OK	44.5851	52.3481	0.231574	1.0733	0.4883	0.998514	no
AT1G25550.1,AT1G25550.2	1:8976325-8978305	COI0	38600	OK	41.5369	97.8263	1.23583	4.36432	5e-05	0.00838689	yes
AT1G26090.1	1:9020379-9024081	COI0	38600	OK	8.70745	5.95701	-0.547663	-1.41924	0.18515	0.998514	no
AT1G05977.1	1:9020379-9024081	COI0	38600	NOTEST	0	0	0	0	1	1	no
AT1G26130.1,AT1G26130.2,AT1G26130.3,AT1G26130.4	1:9033015-9039540	COI0	38600	OK	5.02445	5.33557	0.0866754	0.26552	0.788	0.998514	no
AT1G26180.1,AT1G26180.2	1:9047291-9056941	COI0	38600	OK	20.3565	26.5695	0.384287	0.777897	0.42635	0.998514	no
AT1G26210.1	1:9065954-9075350	COI0	38600	OK	13.0631	8.79756	-0.570323	-0.908468	0.47015	0.998514	no
AT1G05987.1	1:9065954-9075350	COI0	38600	NOTEST	0.423562	0	#NAME?	0	1	1	no
AT1G26220.1	1:9065954-9075350	COI0	38600	OK	40.5086	42.4692	0.068188	0.172313	0.88935	0.998514	no
AT1G26225.1	1:9065954-9075350	COI0	38600	NOTEST	0	0	0	0	1	1	no
AT1G26250.1	1:9083837-9085651	COI0	38600	NOTEST	0	0	0	0	1	1	no
AT1G26260.1,AT1G26260.2,AT1G26260.3,AT1G26260.4,AT1G26260.5,AT1G26260.6	1:9086803-9089375	COI0	38600	OK	5.35043	3.31641	-0.690034	-1.42124	0.1365	0.998514	no
AT1G26290.1	1:9095767-9099766	COI0	38600	OK	1.75083	0.544889	-1.68401	-1.31411	0.3104	0.998514	no
AT1G26320.1,AT1G26320.2	1:9105037-9107231	COI0	38600	OK	0.789301	0	#NAME?	#NAME?	0.0001	0.0150964	yes
AT1G26330.1,AT1G26330.2	1:9107518-9113747	COI0	38600	OK	11.0251	1.43209	-2.9446	-7.20507	5e-05	0.00838689	yes
AT1G26340.1	1:9113863-9114977	COI0	38600	OK	29.1861	30.0877	0.0438905	0.159934	0.8963	0.998514	no
AT1G26430.1	1:9143809-9143883	COI0	38600	NOTEST	0	0	0	0	1	1	no
AT1G26460.1	1:9151627-9154762	COI0	38600	OK	25.7919	26.7657	0.0534672	0.213757	0.8501	0.998514	no
AT1G26470.1	1:9155090-9158093	COI0	38600	OK	43.0955	48.5482	0.17188	0.629462	0.5969	0.998514	no
AT1G26490.1	1:9158182-9158255	COI0	38600	NOTEST	0	0	0	0	1	1	no
AT1G26500.1	1:9158379-9161044	COI0	38600	OK	2.06501	2.01009	-0.0388871	-0.0775449	0.95675	0.998514	no
AT1G26530.1	1:9163210-9170953	COI0	38600	OK	3.23126	2.2967	-0.492537	-0.796791	0.60605	0.998514	no
AT1G26550.1	1:9171117-9173033	COI0	38600	OK	91.9119	94.8914	0.0460259	0.181071	0.8711	0.998514	no
AT1G26558.1,AT1G26558.2	1:9175610-9177598	COI0	38600	OK	1.65404	4.64419	1.48944	1.68141	0.1382	0.998514	no
AT1G26560.1,AT1G26570.1	1:9178211-9184393	COI0	38600	OK	45.5027	52.6636	0.210857	0.872763	0.45185	0.998514	no
AT1G26580.1,AT1G26580.2,AT1G26580.3	1:9184566-9187578	COI0	38600	OK	51.636	49.6757	-0.0558376	-0.201664	0.83395	0.998514	no
AT1G26590.1,AT1G26590.2,AT1G26590.4	1:9188944-9190896	COI0	38600	NOTEST	0.184704	0	#NAME?	0	1	1	no
AT1G26600.2	1:9191502-9192590	COI0	38600	OK	3.05315	5.80661	0.927401	1.49067	0.13665	0.998514	no
AT1G26610.1	1:9193326-9195382	COI0	38600	OK	1.05063	0.476326	-1.14124	-1.78116	0.2054	0.998514	no
AT1G26630.1,AT1G26630.2	1:9205799-9209902	COI0	38600	OK	785.75	779.962	-0.0106664	-0.0443177	0.97505	0.998514	no
AT1G26650.1	1:9210050-9211588	COI0	38600	OK	18.7112	20.5819	0.137475	0.721343	0.6829	0.998514	no
AT1G26660.1,AT1G26660.2	1:9211598-9214004	COI0	38600	OK	11.313	12.024	0.0879414	0.22128	0.82345	0.998514	no
AT1G26665.1,AT1G26665.2	1:9214071-9215557	COI0	38600	OK	67.9993	45.9007	-0.567004	-1.8839	0.0572	0.826634	no
AT1G26670.1	1:9215769-9218010	COI0	38600	OK	62.4649	49.504	-0.335499	-1.49917	0.2374	0.998514	no
AT1G26680.1,AT1G26680.2,AT1G26680.3,AT1G26680.4,AT1G26680.5,AT1G26680.6	1:9219459-9223795	COI0	38600	NOTEST	0.23016	0.299626	0.380523	0	1	1	no
AT1G26700.1,AT1G26700.2	1:9227340-9233206	COI0	38600	NOTEST	0.0580852	0	#NAME?	0	1	1	no
AT1G26730.1,AT1G26730.2	1:9241035-9244918	COI0	38600	OK	1.9513	2.52835	0.373761	0.754781	0.4412	0.998514	no
AT1G26750.1	1:9246856-9249943	COI0	38600	OK	34.6913	33.1238	-0.0667025	-0.304937	0.8527	0.998514	no
AT1G26762.1	1:9253598-9254167	COI0	38600	NOTEST	0	0	0	0	1	1	no
AT1G06023.1	1:9257085-9257400	COI0	38600	NOTEST	0	0	0	0	1	1	no
AT1G26770.1,AT1G26770.2	1:9259431-9261313	COI0	38600	OK	41.8207	27.5075	-0.604393	-2.06499	0.0369	0.69744	no
AT1G26773.1	1:9264403-9264580	COI0	38600	NOTEST	0	0	0	0	1	1	no
AT1G26780.1,AT1G26780.2	1:9270951-9272713	COI0	38600	OK	1.35061	2.02238	0.582437	0.815575	0.4076	0.998514	no
AT1G26795.1	1:9276380-9276954	COI0	38600	NOTEST	0.851083	0	#NAME?	0	1	1	no
AT1G26796.1	1:9278952-9279482	COI0	38600	NOTEST	0	0	0	0	1	1	no
AT1G26797.1	1:9280954-9281560	COI0	38600	NOTEST	0	0	0	0	1	1	no
AT1G26798.1	1:9281790-9282341	COI0	38600	NOTEST	0	0	0	0	1	1	no
AT1G26799.1	1:9283872-9284438	COI0	38600	NOTEST	0	0	0	0	1	1	no
AT1G06027.1	1:9291722-9292147	COI0	38600	NOTEST	0	0	0	0	1	1	no
AT1G26830.1,AT1G26840.1	1:9295564-9300800	COI0	38600	OK	42.0302	41.5743	-0.0157353	-0.0554976	0.9555	0.998514	no
AT1G26870.1	1:9312935-9315122	COI0	38600	NOTEST	0.0464648	0	#NAME?	0	1	1	no
AT1G26890.1,AT1G26890.2,AT1G26890.3,AT1G26890.4,AT1G26890.5	1:9315304-9319246	COI0	38600	NOTEST	0.196744	0.23664	0.266372	0	1	1	no
AT1G26910.1,AT1G26910.2	1:9321649-9323028	COI0	38600	OK	38.874	38.183	-0.0258724	-0.0785483	0.9373	0.998514	no
AT1G06037.1	1:9325014-9325259	COI0	38600	NOTEST	0	0	0	0	1	1	no
AT1G26920.1	1:9329492-9330612	COI0	38600	OK	94.5426	78.845	-0.261945	-1.62883	0.3477	0.998514	no
AT1G26940.1,AT1G26940.2	1:9343111-9345323	COI0	38600	OK	10.3325	8.41639	-0.295914	-0.704566	0.47125	0.998514	no
AT1G26945.1	1:9351159-9352833	COI0	38600	OK	52.2882	29.4521	-0.828115	-3.74963	0.00825	0.332008	no
AT1G26960.1	1:9355826-9357502	COI0	38600	OK	12.2021	7.5211	-0.698117	-2.2827	0.0901	0.943902	no
AT1G26970.1,AT1G26970.2	1:9359324-9361833	COI0	38600	NOTEST	0.263456	0.255985	-0.0415075	0	1	1	no
at1g26975	1:9364470-9364570	COI0	38600	NOTEST	0	0	0	0	1	1	no
AT1G26976.1	1:9364748-9365610	COI0	38600	NOTEST	0	0	0	0	1	1	no
at1g26985	1:9367079-9367179	COI0	38600	NOTEST	0	0	0	0	1	1	no
AT1G27000.1	1:9373884-9377491	COI0	38600	OK	57.7668	49.6912	-0.21725	-0.766953	0.4345	0.998514	no
AT1G27020.1	1:9378403-9380790	COI0	38600	OK	78.2274	22.0414	-1.82746	-8.07718	5e-05	0.00838689	yes
AT1G27030.1	1:9381526-9384060	COI0	38600	OK	32.9063	23.8154	-0.466471	-1.95579	0.11765	0.998514	no
AT1G27045.1,AT1G27045.2,AT1G27045.3,AT1G27045.4,AT1G27045.5	1:9391608-9393188	COI0	38600	OK	7.88654	2.45652	-1.68278	-2.94006	0.00755	0.313922	no
AT1G27050.1	1:9393652-9394716	COI0	38600	OK	19.8345	26.3901	0.411986	1.41158	0.2156	0.998514	no
AT1G27060.1	1:9394906-9399500	COI0	38600	OK	3.31735	2.57347	-0.366318	-0.596625	0.69265	0.998514	no
AT1G27080.1,AT1G27080.2	1:9400325-9406369	COI0	38600	NOTEST	0.102447	0.0797503	-0.361321	0	1	1	no
AT1G27120.1,AT1G27120.2	1:9421008-9424084	COI0	38600	OK	8.91119	7.47121	-0.254276	-0.728733	0.46165	0.998514	no
AT1G27130.1	1:9425279-9426897	COI0	38600	OK	53.2639	40.7799	-0.385299	-1.69264	0.17435	0.998514	no
AT1G27135.1	1:9427163-9427529	COI0	38600	NOTEST	0	0	0	0	1	1	no
AT1G27140.1	1:9427803-9428914	COI0	38600	NOTEST	0.700242	0.0835338	-3.06742	0	1	1	no
AT1G27150.1	1:9429007-9432310	COI0	38600	OK	27.3304	24.6695	-0.147774	-0.63099	0.6158	0.998514	no
AT1G27160.1	1:9432417-9433190	COI0	38600	NOTEST	0	0	0	0	1	1	no
AT1G27170.1,AT1G27170.2	1:9433392-9439417	COI0	38600	OK	1.01724	1.35135	0.409736	0.832435	0.392	0.998514	no
AT1G27180.1,AT1G27180.2,AT1G27180.3,AT1G27180.4,AT1G27180.5,AT1G27180.6,AT1G27180.7,AT1G27180.8	1:9439652-9446223	COI0	38600	OK	1.87658	2.46622	0.394198	0.970065	0.31545	0.998514	no
AT1G06047.1	1:9452631-9452831	COI0	38600	NOTEST	0	0	0	0	1	1	no
AT1G27220.1	1:9463805-9465444	COI0	38600	NOTEST	0	0	0	0	1	1	no
AT1G27240.1	1:9466236-9467076	COI0	38600	NOTEST	0.224286	0.589096	1.39316	0	1	1	no
AT1G27250.1	1:9468567-9469634	COI0	38600	NOTEST	0	0	0	0	1	1	no
AT1G27260.1	1:9469947-9470967	COI0	38600	NOTEST	0	0	0	0	1	1	no
AT1G27270.1	1:9472076-9473149	COI0	38600	NOTEST	1.07301	0.936717	-0.195978	0	1	1	no
AT1G06067.1	1:9473379-9473719	COI0	38600	NOTEST	0	0	0	0	1	1	no
AT1G27280.1	1:9474026-9474990	COI0	38600	NOTEST	0.513851	0.587208	0.192521	0	1	1	no
AT1G27290.1,AT1G27290.2	1:9481404-9482992	COI0	38600	OK	62.2751	96.1661	0.626872	2.18912	0.02855	0.623946	no
AT1G27300.1	1:9483156-9486002	COI0	38600	OK	58.5527	54.2994	-0.108797	-0.228692	0.82475	0.998514	no
AT1G27320.1	1:9486888-9492632	COI0	38600	OK	37.2029	42.808	0.202465	0.802996	0.4781	0.998514	no
AT1G27330.1	1:9492848-9494382	COI0	38600	OK	35.4395	31.9275	-0.150558	-0.752711	0.6558	0.998514	no
AT1G27340.1	1:9495343-9499639	COI0	38600	OK	26.5754	29.3273	0.142154	0.488746	0.6436	0.998514	no
AT1G27360.1,AT1G27360.2,AT1G27360.3,AT1G27360.4	1:9500891-9504023	COI0	38600	OK	12.5625	8.69118	-0.531499	-1.54733	0.1199	0.998514	no
AT1G27400.1	1:9515113-9517070	COI0	38600	OK	310.518	281.691	-0.140562	-0.480994	0.6221	0.998514	no
AT1G06087.1	1:9515113-9517070	COI0	38600	NOTEST	0	0	0	0	1	1	no
AT1G27410.1,AT1G27420.1	1:9517200-9520716	COI0	38600	OK	10.2791	9.54079	-0.107538	-0.353388	0.7534	0.998514	no
AT1G27450.1,AT1G27450.2,AT1G27450.3,AT1G27450.4	1:9531808-9534141	COI0	38600	OK	113.747	100.092	-0.1845	-0.64371	0.5094	0.998514	no
AT1G27460.1,AT1G27460.2,AT1G27460.3	1:9534487-9537614	COI0	38600	OK	5.77786	5.41869	-0.0925908	-0.257142	0.7951	0.998514	no
AT1G27480.1	1:9544409-9546285	COI0	38600	OK	25.2263	31.6874	0.328985	1.20443	0.25435	0.998514	no
AT1G27520.1	1:9558561-9562485	COI0	38600	OK	30.4363	25.7058	-0.243703	-0.963201	0.3847	0.998514	no
AT1G27535.1	1:9564725-9565134	COI0	38600	NOTEST	0	0	0	0	1	1	no
AT1G27555.1	1:9570396-9570962	COI0	38600	NOTEST	0	0	0	0	1	1	no
AT1G06097.1	1:9572454-9572795	COI0	38600	NOTEST	0	0	0	0	1	1	no
AT1G27565.1	1:9574549-9575189	COI0	38600	NOTEST	0.241555	0	#NAME?	0	1	1	no
AT1G27570.1,AT1G27570.2	1:9575537-9582376	COI0	38600	NOTEST	0	0	0	0	1	1	no
AT1G27595.1,AT1G27595.2	1:9592087-9602917	COI0	38600	OK	17.8269	18.8868	0.0833171	0.252011	0.79235	0.998514	no
AT1G27620.1	1:9608152-9610566	COI0	38600	OK	3.24058	3.03426	-0.0949043	-0.204526	0.8461	0.998514	no
AT1G27630.1,AT1G27630.2,AT1G27630.3,AT1G27630.4,AT1G27630.5,AT1G27630.6	1:9611052-9614336	COI0	38600	OK	10.1694	12.5993	0.309115	0.881489	0.3723	0.998514	no
AT1G27650.1,AT1G27650.2	1:9614462-9616574	COI0	38600	OK	42.5886	43.1006	0.0172429	0.061133	0.94875	0.998514	no
AT1G27660.1	1:9621397-9626067	COI0	38600	OK	3.53859	4.63588	0.389668	0.992704	0.3707	0.998514	no
AT1G27680.1	1:9631189-9634597	COI0	38600	OK	12.1238	11.4464	-0.0829507	-0.321913	0.804	0.998514	no
AT1G27690.1	1:9636587-9638901	COI0	38600	OK	10.016	11.4023	0.18702	0.611214	0.5761	0.998514	no
AT1G27695.1,AT1G27695.2	1:9639023-9641902	COI0	38600	OK	20.67	12.262	-0.753345	-2.26836	0.2313	0.998514	no
AT1G27710.1,AT1G27710.2	1:9642471-9647620	COI0	38600	NOTEST	0	0	0	0	1	1	no
AT1G27740.1	1:9654474-9656089	COI0	38600	NOTEST	0.113829	0.133534	0.230343	0	1	1	no
AT1G27750.1,AT1G27752.1,AT1G27752.2	1:9657172-9667550	COI0	38600	OK	16.337	20.747	0.344766	1.15849	0.2437	0.998514	no
AT1G27760.1,AT1G27760.2,AT1G27760.3	1:9668507-9676307	COI0	38600	OK	66.291	69.4928	0.0680513	0.216304	0.85945	0.998514	no
AT1G27820.1	1:9691627-9692560	COI0	38600	NOTEST	0	0	0	0	1	1	no
AT1G27850.1	1:9698297-9703944	COI0	38600	OK	12.5199	13.1951	0.0757739	0.261221	0.78475	0.998514	no
AT1G27880.1,AT1G27880.2	1:9708860-9715176	COI0	38600	OK	2.55679	2.86264	0.163009	0.439935	0.70585	0.998514	no
AT1G27920.1,AT1G27920.2	1:9726606-9730424	COI0	38600	OK	3.17421	2.45009	-0.373562	-0.535209	0.5839	0.998514	no
AT1G27950.1	1:9740507-9745796	COI0	38600	OK	145.273	187.884	0.371078	1.37545	0.1974	0.998514	no
AT1G27970.1,AT1G27970.2,AT1G27980.1	1:9746708-9753952	COI0	38600	OK	208.955	200.005	-0.0631498	-0.308777	0.83035	0.998514	no
AT1G28005.1	1:9756673-9757963	COI0	38600	NOTEST	0	0.413734	inf	0	1	1	no
AT1G28010.1	1:9763210-9768113	COI0	38600	OK	4.46566	5.19176	0.217353	0.679033	0.50665	0.998514	no
AT1G28030.1	1:9771792-9773389	COI0	38600	NOTEST	0.0876369	0	#NAME?	0	1	1	no
AT1G28060.1,AT1G28060.2,AT1G28060.3,AT1G28070.1	1:9778850-9784091	COI0	38600	OK	21.807	26.7715	0.29591	0.8817	0.33565	0.998514	no
AT1G28080.1,AT1G28080.2	1:9789690-9791546	COI0	38600	OK	0.961416	1.00465	0.0634664	0.0731203	0.9381	0.998514	no
AT1G06113.1	1:9794543-9794763	COI0	38600	NOTEST	0	0	0	0	1	1	no
AT1G28090.1,AT1G28090.2,AT1G28090.3,AT1G28090.4,AT1G28090.5	1:9795717-9799116	COI0	38600	OK	13.0932	13.1427	0.00544422	0.0165768	0.9873	0.998514	no
AT1G28100.1,AT1G28100.2,AT1G28100.3,AT1G28100.4,AT1G28100.5,AT1G28100.6	1:9801081-9806899	COI0	38600	OK	10.2931	11.7805	0.194714	0.457992	0.7177	0.998514	no
AT1G28130.1,AT1G28130.2	1:9825168-9828118	COI0	38600	OK	12.2397	14.9745	0.290937	0.943215	0.3342	0.998514	no
AT1G28135.1	1:9829260-9829584	COI0	38600	NOTEST	0	0	0	0	1	1	no
AT1G28160.1	1:9839315-9840124	COI0	38600	NOTEST	0	0	0	0	1	1	no
AT1G28170.1	1:9841268-9842435	COI0	38600	NOTEST	0	0	0	0	1	1	no
AT1G06127.1	1:9848882-9849226	COI0	38600	NOTEST	0	0	0	0	1	1	no
AT1G28210.1,AT1G28210.2,AT1G28210.3	1:9854516-9860158	COI0	38600	OK	6.09121	6.51581	0.0972166	0.244711	0.80575	0.998514	no
AT1G28250.1	1:9874246-9879433	COI0	38600	OK	19.312	20.7455	0.1033	0.286227	0.8575	0.998514	no
AT1G28265.1	1:9874246-9879433	COI0	38600	NOTEST	0	0	0	0	1	1	no
AT1G06133.1	1:9882236-9882450	COI0	38600	NOTEST	0	0	0	0	1	1	no
AT1G28270.1	1:9882950-9884189	COI0	38600	OK	1.85885	0	#NAME?	#NAME?	5e-05	0.00838689	yes
AT1G28327.1	1:9931933-9933451	COI0	38600	NOTEST	0	0	0	0	1	1	no
AT1G28335.1	1:9937000-9937755	COI0	38600	NOTEST	0.24787	0	#NAME?	0	1	1	no
AT1G06147.1	1:9938599-9939013	COI0	38600	NOTEST	0	0	0	0	1	1	no
AT1G28340.1	1:9939960-9943616	COI0	38600	OK	26.0573	26.9033	0.0460981	0.182566	0.87	0.998514	no
AT1G28350.1,AT1G28350.2,AT1G28350.3	1:9943736-9949835	COI0	38600	OK	13.5997	19.0546	0.486563	1.65593	0.0917	0.951353	no
AT1G28360.1	1:9951761-9953105	COI0	38600	OK	3.68006	2.34179	-0.652119	-1.34288	0.2587	0.998514	no
AT1G28375.1	1:9961054-9961745	COI0	38600	OK	11.3125	5.82413	-0.957801	-2.71337	0.10315	0.983332	no
AT1G28380.1	1:9963447-9968495	COI0	38600	OK	23.0841	28.5425	0.306209	1.04933	0.2969	0.998514	no
AT1G06153.1	1:9963447-9968495	COI0	38600	OK	4.01052	17.9146	2.15928	0.275796	0.37765	0.998514	no
AT1G28420.1	1:9976181-9987737	COI0	38600	OK	17.4329	17.3252	-0.00893823	-0.0304402	0.97595	0.998514	no
AT1G28440.1	1:9996712-10000455	COI0	38600	OK	38.7144	38.2496	-0.0174271	-0.0689596	0.94985	0.998514	no
AT1G28450.1	1:10003879-10004581	COI0	38600	NOTEST	0	0	0	0	1	1	no
AT1G28460.1	1:10006229-10006778	COI0	38600	NOTEST	0	0	0	0	1	1	no
AT1G28470.1	1:10010123-10012258	COI0	38600	OK	2.2507	2.3595	0.0681068	0.126839	0.90685	0.998514	no
AT1G06163.1	1:10012636-10013263	COI0	38600	NOTEST	0	0	0	0	1	1	no
AT1G28490.1,AT1G28490.2,AT1G28490.3	1:10015855-10018047	COI0	38600	OK	31.6224	26.4729	-0.256431	-0.805002	0.4063	0.998514	no
AT1G28500.1	1:10018690-10020479	COI0	38600	NOTEST	0.384929	0.280974	-0.454156	0	1	1	no
AT1G28510.1	1:10023816-10026311	COI0	38600	OK	27.761	31.3243	0.174222	0.759283	0.58735	0.998514	no
AT1G28520.1,AT1G28520.2,AT1G28520.3,AT1G28520.4,AT1G28520.5	1:10029082-10037872	COI0	38600	OK	37.8821	32.6517	-0.214358	-0.692597	0.50455	0.998514	no
AT1G28540.1	1:10029082-10037872	COI0	38600	OK	15.8541	14.3051	-0.148327	-0.267259	0.8553	0.998514	no
AT1G28680.1,AT1G28680.2	1:10077922-10079909	COI0	38600	OK	32.4913	30.352	-0.0982625	-0.335503	0.7309	0.998514	no
AT1G28720.1	1:10086365-10089772	COI0	38600	NOTEST	0	0	0	0	1	1	no
AT1G28730.1	1:10089897-10089969	COI0	38600	NOTEST	0	0	0	0	1	1	no
AT1G28740.1	1:10090367-10090439	COI0	38600	NOTEST	0	0	0	0	1	1	no
AT1G28750.1	1:10090768-10090840	COI0	38600	NOTEST	0	0	0	0	1	1	no
AT1G28770.1	1:10092324-10092396	COI0	38600	NOTEST	0	0	0	0	1	1	no
AT1G28780.1	1:10092800-10092872	COI0	38600	NOTEST	0	0	0	0	1	1	no
AT1G28790.1	1:10093308-10093380	COI0	38600	NOTEST	0	0	0	0	1	1	no
AT1G28800.1	1:10093745-10093817	COI0	38600	NOTEST	0	0	0	0	1	1	no
AT1G28810.1	1:10094172-10094244	COI0	38600	NOTEST	0	0	0	0	1	1	no
AT1G06173.1	1:10094621-10095222	COI0	38600	NOTEST	0	0.703216	inf	0	1	1	no
AT1G28815.1	1:10095673-10102928	COI0	38600	NOTEST	0.201199	0	#NAME?	0	1	1	no
AT1G28820.1	1:10095673-10102928	COI0	38600	NOTEST	0	0	0	0	1	1	no
AT1G28830.1	1:10095673-10102928	COI0	38600	NOTEST	0	0	0	0	1	1	no
AT1G28840.1	1:10095673-10102928	COI0	38600	NOTEST	0	0	0	0	1	1	no
AT1G28850.1	1:10095673-10102928	COI0	38600	NOTEST	0	0	0	0	1	1	no
AT1G28860.1	1:10095673-10102928	COI0	38600	NOTEST	0	0	0	0	1	1	no
AT1G28870.1	1:10095673-10102928	COI0	38600	NOTEST	0	0	0	0	1	1	no
AT1G28880.1	1:10095673-10102928	COI0	38600	NOTEST	0	0	0	0	1	1	no
AT1G28890.1	1:10095673-10102928	COI0	38600	NOTEST	0	0	0	0	1	1	no
AT1G28900.1	1:10095673-10102928	COI0	38600	NOTEST	0	0	0	0	1	1	no
AT1G28910.1	1:10095673-10102928	COI0	38600	NOTEST	0	0	0	0	1	1	no
AT1G28920.1	1:10095673-10102928	COI0	38600	NOTEST	0	0	0	0	1	1	no
AT1G28760.1	1:10103080-10104883	COI0	38600	OK	7.20218	6.05219	-0.250977	-0.926968	0.56625	0.998514	no
AT1G28930.1	1:10105046-10107645	COI0	38600	NOTEST	0	0	0	0	1	1	no
AT1G28940.1	1:10105046-10107645	COI0	38600	NOTEST	0	0	0	0	1	1	no
AT1G28950.1	1:10105046-10107645	COI0	38600	NOTEST	0	0	0	0	1	1	no
AT1G28970.1	1:10107648-10107720	COI0	38600	NOTEST	0	0	0	0	1	1	no
AT1G28980.1	1:10108388-10108460	COI0	38600	NOTEST	0	0	0	0	1	1	no
AT1G28990.1	1:10108709-10108781	COI0	38600	NOTEST	0	0	0	0	1	1	no
AT1G29000.1,AT1G29000.2	1:10112563-10114491	COI0	38600	NOTEST	0.327948	0	#NAME?	0	1	1	no
AT1G29005.1	1:10114911-10115749	COI0	38600	NOTEST	0	0	0	0	1	1	no
AT1G29010.1	1:10117714-10119085	COI0	38600	NOTEST	0.624321	0	#NAME?	0	1	1	no
AT1G06187.1	1:10119307-10119662	COI0	38600	NOTEST	0	0	0	0	1	1	no
AT1G06203.1	1:10127672-10128207	COI0	38600	NOTEST	0	0	0	0	1	1	no
AT1G29040.1,AT1G29040.2,AT1G29040.3,AT1G29040.4,AT1G29040.5,AT1G29041.1	1:10128998-10136241	COI0	38600	OK	26.8959	29.7223	0.144158	0.381526	0.75405	0.998514	no
AT1G06217.1	1:10136245-10139228	COI0	38600	NOTEST	0	0	0	0	1	1	no
AT1G29060.1,AT1G29060.2,AT1G29070.1	1:10147604-10151407	COI0	38600	OK	132.4	164.721	0.315122	1.11793	0.2512	0.998514	no
AT1G29100.1,AT1G29100.2	1:10168716-10169916	COI0	38600	NOTEST	0.203146	0	#NAME?	0	1	1	no
AT1G29110.1	1:10171682-10173071	COI0	38600	NOTEST	0.191557	0.398595	1.05715	0	1	1	no
AT1G29120.1,AT1G29120.2,AT1G29120.3,AT1G29120.4,AT1G29120.5,AT1G29120.6,AT1G29120.7,AT1G29120.8	1:10174161-10178521	COI0	38600	OK	31.3993	33.9208	0.111437	0.400742	0.6873	0.998514	no
AT1G29140.1	1:10178901-10180225	COI0	38600	OK	9.65717	0	#NAME?	#NAME?	5e-05	0.00838689	yes
AT1G29150.1,AT1G29150.2	1:10180301-10182808	COI0	38600	OK	103.393	103.139	-0.00355178	-0.0123211	0.98975	0.998514	no
AT1G29179.1,AT1G29180.1	1:10198763-10200962	COI0	38600	NOTEST	0.154061	0.0885357	-0.79917	0	1	1	no
AT1G29200.1,AT1G29200.2,AT1G29200.3,AT1G29200.4	1:10207576-10212722	COI0	38600	OK	0.9274	0.839056	-0.144424	-0.134437	0.9155	0.998514	no
AT1G29230.1	1:10214680-10216563	COI0	38600	OK	0.923849	0.672584	-0.457941	-0.605515	0.55145	0.998514	no
AT1G29260.1	1:10224814-10226322	COI0	38600	OK	33.8254	29.4903	-0.197867	-1.13297	0.52355	0.998514	no
at1g29265	1:10227072-10227195	COI0	38600	NOTEST	0	0	0	0	1	1	no
AT1G29270.1,AT1G29270.2	1:10229807-10231384	COI0	38600	OK	2.58405	2.30492	-0.16492	-0.228971	0.81385	0.998514	no
AT1G29280.1	1:10236336-10237990	COI0	38600	OK	6.84412	7.11984	0.0569785	0.143109	0.88335	0.998514	no
AT1G29290.1	1:10244452-10245874	COI0	38600	NOTEST	1.02392	0.695128	-0.558746	0	1	1	no
AT1G29310.1,AT1G29310.2	1:10252240-10254792	COI0	38600	OK	28.377	27.6207	-0.0389723	-0.130857	0.89545	0.998514	no
AT1G29320.1,AT1G29320.2	1:10255249-10261232	COI0	38600	OK	20.6975	22.14	0.0971986	0.339315	0.77905	0.998514	no
AT1G29340.1	1:10264042-10266917	COI0	38600	OK	34.8835	43.8093	0.32869	1.46745	0.2394	0.998514	no
AT1G29355.1	1:10273930-10275765	COI0	38600	OK	7.98991	6.34155	-0.333343	-0.570099	0.56125	0.998514	no
AT1G29380.1,AT1G29380.2,AT1G29380.3,AT1G29380.4	1:10283395-10289666	COI0	38600	OK	1.77403	1.24943	-0.505764	-0.543683	0.61295	0.998514	no
AT1G06233.1	1:10300192-10301302	COI0	38600	NOTEST	0	0	0	0	1	1	no
AT1G06237.1	1:10300192-10301302	COI0	38600	NOTEST	0	0	0	0	1	1	no
AT1G29418.1	1:10300192-10301302	COI0	38600	OK	9.07754	6.84948	-0.406306	-0.515695	0.5778	0.998514	no
AT1G06257.1	1:10301376-10302099	COI0	38600	OK	3.67984	1.76335	-1.06133	-0.767771	0.41655	0.998514	no
AT1G29435.1	1:10303889-10306595	COI0	38600	NOTEST	0	0	0	0	1	1	no
AT1G29465.1	1:10308519-10309896	COI0	38600	OK	10.059	16.9441	0.752297	1.30213	0.17755	0.998514	no
AT1G06267.1	1:10308519-10309896	COI0	38600	NOTEST	0	0	0	0	1	1	no
AT1G06273.1	1:10308519-10309896	COI0	38600	NOTEST	0	0	0	0	1	1	no
AT1G06277.1	1:10308519-10309896	COI0	38600	NOTEST	0	0	0	0	1	1	no
AT1G06283.1	1:10308519-10309896	COI0	38600	NOTEST	0	0	0	0	1	1	no
AT1G29480.1	1:10317935-10318711	COI0	38600	NOTEST	0	0	0	0	1	1	no
AT1G29490.1	1:10319731-10320402	COI0	38600	OK	1.3733	1.00296	-0.453378	-0.693078	0.7067	0.998514	no
AT1G29500.1	1:10321010-10321978	COI0	38600	OK	20.4821	15.1954	-0.430727	-1.72739	0.2655	0.998514	no
AT1G29510.1	1:10322422-10323239	COI0	38600	OK	10.5545	6.61028	-0.675075	-1.99117	0.198	0.998514	no
AT1G29520.1	1:10323635-10326848	COI0	38600	OK	16.3823	15.179	-0.11006	-0.234982	0.83695	0.998514	no
AT1G29540.1	1:10327137-10329121	COI0	38600	NOTEST	0.245566	0.46306	0.915089	0	1	1	no
AT1G06287.1	1:10327137-10329121	COI0	38600	OK	0	4.22861	inf	#NAME?	0.14375	0.998514	no
AT1G29550.1,AT1G29560.1,AT1G29560.2	1:10330424-10335714	COI0	38600	OK	9.95973	8.57542	-0.215898	-0.590421	0.59325	0.998514	no
AT1G29570.1	1:10335909-10337854	COI0	38600	NOTEST	0.0695409	0.176924	1.3472	0	1	1	no
AT1G29580.1	1:10338442-10339146	COI0	38600	NOTEST	0	0	0	0	1	1	no
AT1G29590.1	1:10339991-10341832	COI0	38600	OK	7.2387	6.164	-0.231863	-0.611414	0.63235	0.998514	no
AT1G29600.1,AT1G29600.2	1:10343784-10346364	COI0	38600	OK	1.61498	1.52467	-0.0830149	-0.128349	0.89705	0.998514	no
AT1G29620.1	1:10347362-10349017	COI0	38600	NOTEST	0	0	0	0	1	1	no
AT1G29630.1,AT1G29630.2,AT1G29630.3	1:10349426-10353833	COI0	38600	OK	4.70254	3.74048	-0.330215	-0.79314	0.4174	0.998514	no
AT1G29660.1	1:10371674-10374005	COI0	38600	OK	48.8136	58.2589	0.255194	1.06229	0.3679	0.998514	no
AT1G29670.1,AT1G29670.2	1:10375598-10378961	COI0	38600	OK	60.1239	102.708	0.772538	2.91091	0.0052	0.255342	no
AT1G06293.1	1:10383998-10384275	COI0	38600	NOTEST	0	0	0	0	1	1	no
AT1G29710.1	1:10387513-10389286	COI0	38600	OK	7.09898	6.87804	-0.0456148	-0.164503	0.91385	0.998514	no
AT1G29760.1,AT1G29770.1	1:10422291-10429143	COI0	38600	OK	20.0348	18.0648	-0.149323	-0.599166	0.6351	0.998514	no
AT1G29780.1	1:10422291-10429143	COI0	38600	OK	2.51076	1.81688	-0.466661	-0.396243	0.8244	0.998514	no
AT1G29790.1,AT1G29790.2	1:10429717-10432123	COI0	38600	OK	18.998	13.9269	-0.447971	-1.39933	0.1566	0.998514	no
AT1G29800.1,AT1G29800.2	1:10432598-10437558	COI0	38600	OK	10.3355	9.22418	-0.164123	-0.497761	0.68565	0.998514	no
AT1G29820.1,AT1G29820.2	1:10437656-10440786	COI0	38600	OK	7.87604	7.68425	-0.0355662	-0.0948387	0.9223	0.998514	no
AT1G29830.1,AT1G29830.2,AT1G29830.3	1:10441052-10449969	COI0	38600	NOTEST	0.0725747	0.0833443	0.199617	0	1	1	no
AT1G29850.1,AT1G29850.2,AT1G29850.3	1:10441052-10449969	COI0	38600	OK	79.9001	72.6248	-0.137734	-0.453953	0.6437	0.998514	no
AT1G29860.1	1:10454432-10455874	COI0	38600	NOTEST	0.776364	0.655751	-0.243583	0	1	1	no
AT1G29890.1,AT1G29890.2,AT1G29890.3	1:10463028-10467452	COI0	38600	OK	16.1402	16.0915	-0.00435873	-0.0136922	0.98945	0.998514	no
AT1G29900.1	1:10467955-10472211	COI0	38600	OK	58.332	63.9464	0.132577	0.514297	0.6475	0.998514	no
AT1G29930.1	1:10477884-10486824	COI0	38600	OK	3268.43	3609.84	0.143335	0.15265	0.85755	0.998514	no
AT1G29950.1,AT1G29950.2,AT1G29960.1,AT1G29960.2	1:10491697-10496205	COI0	38600	OK	39.2916	31.5806	-0.315185	-1.4059	0.27915	0.998514	no
AT1G29962.1	1:10496729-10497287	COI0	38600	NOTEST	0	0.26282	inf	0	1	1	no
AT1G29990.1	1:10507532-10509151	COI0	38600	OK	66.6588	61.7989	-0.109213	-0.577907	0.71125	0.998514	no
AT1G30010.1	1:10513150-10516385	COI0	38600	OK	2.69834	3.02131	0.163105	0.422638	0.7278	0.998514	no
AT1G30040.1,AT1G30040.2	1:10537456-10540044	COI0	38600	OK	3.02212	3.92947	0.378777	0.783972	0.42315	0.998514	no
AT1G30050.1	1:10543021-10544594	COI0	38600	NOTEST	0.167952	0	#NAME?	0	1	1	no
AT1G30100.1	1:10571309-10573365	COI0	38600	NOTEST	0.496879	0.40178	-0.306487	0	1	1	no
AT1G30110.1,AT1G30110.2	1:10581734-10586680	COI0	38600	OK	13.5859	14.1085	0.0544534	0.0607566	0.96305	0.998514	no
AT1G30130.1,AT1G30130.2,AT1G30130.3	1:10587470-10590209	COI0	38600	OK	26.1681	35.6114	0.444529	1.49781	0.1272	0.998514	no
AT1G30135.1	1:10596351-10597341	COI0	38600	NOTEST	0.439412	0.165825	-1.40591	0	1	1	no
AT1G30140.1,AT1G30140.2	1:10598541-10599696	COI0	38600	NOTEST	0	0	0	0	1	1	no
AT1G30160.1,AT1G30160.2	1:10606158-10609618	COI0	38600	OK	4.26605	1.79527	-1.2487	-2.52183	0.04145	0.730224	no
AT1G30190.1	1:10618892-10620067	COI0	38600	OK	1.196	0.321493	-1.89536	-2.17198	0.1195	0.998514	no
AT1G30200.1,AT1G30200.2	1:10624999-10627135	COI0	38600	OK	29.3734	25.7333	-0.190875	-0.65849	0.5013	0.998514	no
AT1G30230.1,AT1G30230.2	1:10638877-10640941	COI0	38600	OK	430.213	351.687	-0.290758	-0.937315	0.33195	0.998514	no
AT1G30260.1	1:10650913-10651829	COI0	38600	OK	4.12923	3.00114	-0.460361	-1.03039	0.4979	0.998514	no
AT1G30270.1,AT1G30270.2,AT1G30270.3	1:10654799-10658924	COI0	38600	OK	39.8323	39.5388	-0.0106712	-0.0379165	0.9682	0.998514	no
AT1G30282.1,AT1G30282.2	1:10662607-10664763	COI0	38600	OK	4.71022	6.74101	0.517171	0.171288	0.7304	0.998514	no
AT1G06317.1	1:10667623-10668129	COI0	38600	NOTEST	0	0	0	0	1	1	no
AT1G30300.1,AT1G30300.2,AT1G30300.3,AT1G30300.4	1:10672972-10675455	COI0	38600	OK	14.524	16.9248	0.220704	0.627341	0.51795	0.998514	no
AT1G30320.1	1:10680078-10683137	COI0	38600	OK	17.6378	24.3962	0.467985	1.61514	0.1106	0.998514	no
AT1G30360.1	1:10715481-10718997	COI0	38600	OK	43.6524	83.7355	0.939779	3.68095	0.0013	0.10903	no
AT1G30380.1	1:10722182-10723247	COI0	38600	OK	810.572	957.374	0.240143	0.712377	0.50265	0.998514	no
AT1G30400.1,AT1G30400.2	1:10727316-10738092	COI0	38600	OK	60.2468	69.7811	0.21195	0.683424	0.4696	0.998514	no
AT1G30410.1,AT1G30410.2,AT1G30410.3,AT1G30410.4,AT1G30410.5,AT1G30410.6	1:10738682-10747563	COI0	38600	OK	10.1469	7.0603	-0.523238	-1.77491	0.06895	0.87735	no
AT1G30420.1,AT1G30420.2	1:10748260-10756695	COI0	38600	OK	3.10244	2.71709	-0.19134	-0.521146	0.58905	0.998514	no
AT1G30430.1	1:10756721-10756794	COI0	38600	NOTEST	0	0	0	0	1	1	no
AT1G30440.1	1:10758742-10762429	COI0	38600	OK	20.0709	18.3977	-0.125577	-0.514675	0.65625	0.998514	no
AT1G30450.1,AT1G30450.2,AT1G30450.3,AT1G30450.4	1:10762707-10769616	COI0	38600	OK	11.4356	12.4524	0.122886	0.40927	0.67675	0.998514	no
AT1G30455.1	1:10769721-10770775	COI0	38600	NOTEST	0	0.130941	inf	0	1	1	no
AT1G06327.1	1:10775822-10776319	COI0	38600	NOTEST	0	0	0	0	1	1	no
AT1G30470.1,AT1G30470.2,AT1G30470.3	1:10779110-10786697	COI0	38600	OK	32.0713	37.9624	0.24329	0.875603	0.36975	0.998514	no
AT1G30473.1	1:10786978-10792725	COI0	38600	NOTEST	0	0	0	0	1	1	no
AT1G30480.1	1:10786978-10792725	COI0	38600	OK	12.915	10.1729	-0.344313	-0.966832	0.32305	0.998514	no
AT1G30520.1,AT1G30520.2,AT1G30520.3,AT1G30520.4	1:10810396-10813779	COI0	38600	OK	15.7865	25.0152	0.664108	2.26637	0.02325	0.575396	no
AT1G30530.1	1:10814611-10816615	COI0	38600	OK	40.36	43.4352	0.10594	0.435727	0.7014	0.998514	no
AT1G30560.1	1:10824636-10826405	COI0	38600	NOTEST	0.386861	0.167886	-1.20433	0	1	1	no
AT1G30570.1	1:10828372-10831656	COI0	38600	OK	9.74956	10.1587	0.0593089	0.234087	0.8483	0.998514	no
AT1G30610.1,AT1G30610.2	1:10846512-10850724	COI0	38600	OK	9.9565	13.7793	0.468794	1.56058	0.1098	0.998514	no
AT1G30620.1,AT1G30620.2,AT1G30620.3,AT1G30620.4,AT1G30620.5,AT1G30620.6	1:10854516-10860322	COI0	38600	OK	9.31372	10.4803	0.170253	0.301009	0.789	0.998514	no
AT1G30640.1,AT1G30640.2,AT1G30640.3	1:10860618-10865074	COI0	38600	OK	6.55497	7.09509	0.114231	0.309903	0.75655	0.998514	no
AT1G30650.1	1:10868217-10871297	COI0	38600	OK	3.995	2.09152	-0.933645	-1.94225	0.05445	0.811389	no
AT1G30660.1,AT1G30660.2,AT1G30660.3	1:10876723-10879143	COI0	38600	OK	1.06942	0.596316	-0.842676	-0.817913	0.38935	0.998514	no
AT1G30680.1	1:10881478-10886472	COI0	38600	OK	18.4588	27.6715	0.584088	2.16391	0.04245	0.739862	no
AT1G30690.1,AT1G30690.2	1:10887606-10890407	COI0	38600	OK	49.7782	51.767	0.0565178	0.201878	0.83625	0.998514	no
AT1G30700.1	1:10892444-10894714	COI0	38600	OK	8.53772	7.91223	-0.109767	-0.289352	0.74355	0.998514	no
AT1G30710.1	1:10895251-10897127	COI0	38600	NOTEST	0.0749911	0	#NAME?	0	1	1	no
AT1G30720.1	1:10897924-10899975	COI0	38600	OK	2.21362	1.93686	-0.192681	-0.379653	0.71495	0.998514	no
AT1G30730.1	1:10900680-10902626	COI0	38600	OK	0.817991	1.44413	0.820045	1.13524	0.2148	0.998514	no
AT1G30740.2	1:10902994-10904739	COI0	38600	NOTEST	0.199117	0.179211	-0.151963	0	1	1	no
AT1G30757.1,AT1G30757.2	1:10904774-10909784	COI0	38600	OK	5.57658	4.49658	-0.310554	-0.317505	0.7512	0.998514	no
AT1G30760.1,AT1G30760.2	1:10918266-10920709	COI0	38600	OK	2.93362	2.88481	-0.0242068	-0.0516166	0.95465	0.998514	no
AT1G06363.1	1:10928004-10928968	COI0	38600	NOTEST	0	0	0	0	1	1	no
AT1G30790.1	1:10932712-10934066	COI0	38600	NOTEST	0.155021	0	#NAME?	0	1	1	no
AT1G30795.1	1:10935683-10936396	COI0	38600	OK	6.9039	0	#NAME?	#NAME?	5e-05	0.00838689	yes
AT1G30800.1	1:10936764-10942292	COI0	38600	NOTEST	0.497032	0.0809462	-2.6183	0	1	1	no
AT1G06373.1	1:10954287-10954711	COI0	38600	NOTEST	0	0	0	0	1	1	no
AT1G30825.1	1:10960907-10963231	COI0	38600	OK	12.7633	16.5577	0.375505	1.54209	0.30645	0.998514	no
AT1G30840.1,AT1G30840.2	1:10974382-10976298	COI0	38600	OK	4.86517	4.37397	-0.153544	-0.321855	0.7438	0.998514	no
AT1G30845.1	1:10979645-10980725	COI0	38600	OK	3.98656	4.17082	0.0651888	0.183299	0.9381	0.998514	no
AT1G06377.1	1:10981461-10981784	COI0	38600	NOTEST	0	0	0	0	1	1	no
AT1G30850.1	1:10985062-10986295	COI0	38600	NOTEST	0.142237	0	#NAME?	0	1	1	no
AT1G30870.1	1:10991477-10994152	COI0	38600	OK	1.2692	0.516176	-1.29799	-0.669443	0.5773	0.998514	no
AT1G30890.1,AT1G30890.2	1:10994242-10996223	COI0	38600	OK	23.8186	21.9159	-0.120115	-0.369092	0.7072	0.998514	no
AT1G30900.1	1:10996869-11000809	COI0	38600	OK	5.45841	4.50629	-0.276543	-0.904473	0.48905	0.998514	no
AT1G30910.1	1:11000861-11003226	COI0	38600	OK	30.2306	31.2795	0.0492106	0.215728	0.86625	0.998514	no
AT1G06387.1	1:11016491-11016886	COI0	38600	NOTEST	0	0	0	0	1	1	no
AT1G06393.1	1:11032357-11032898	COI0	38600	NOTEST	0	0	0	0	1	1	no
AT1G30950.1	1:11035991-11037508	COI0	38600	NOTEST	0.159658	0.0628057	-1.34601	0	1	1	no
AT1G30972.1,AT1G30972.2,AT1G30972.3	1:11044627-11045466	COI0	38600	NOTEST	0	0	0	0	1	1	no
AT1G30974.1,AT1G30974.2	1:11046968-11047816	COI0	38600	NOTEST	0	0	0	0	1	1	no
AT1G30990.1	1:11051998-11053295	COI0	38600	NOTEST	0.184724	0	#NAME?	0	1	1	no
AT1G31020.1	1:11057104-11059037	COI0	38600	OK	12.5393	12.328	-0.0245108	-0.0926521	0.95945	0.998514	no
AT1G31070.1,AT1G31070.2	1:11084665-11088589	COI0	38600	OK	28.8637	35.9092	0.315096	1.099	0.2612	0.998514	no
AT1G31080.1	1:11091831-11092899	COI0	38600	NOTEST	0	0.116281	inf	0	1	1	no
AT1G31090.1	1:11094406-11095649	COI0	38600	NOTEST	0	0	0	0	1	1	no
AT1G31095.1	1:11102313-11103644	COI0	38600	NOTEST	0	0	0	0	1	1	no
AT1G31110.1	1:11104112-11104186	COI0	38600	NOTEST	0	0	0	0	1	1	no
AT1G31140.1,AT1G31140.2,AT1G31150.1,AT1G31150.2	1:11117940-11124220	COI0	38600	OK	7.75037	8.88791	0.19758	0.455653	0.62595	0.998514	no
AT1G31170.1,AT1G31170.2,AT1G31170.3,AT1G31170.4,AT1G31170.5	1:11133409-11135189	COI0	38600	OK	73.629	71.7253	-0.0377922	-0.10945	0.90805	0.998514	no
at1g31173	1:11137538-11137915	COI0	38600	NOTEST	0	0	0	0	1	1	no
AT1G31175.1,AT1G31175.2	1:11140470-11144717	COI0	38600	OK	7.21717	6.04613	-0.255421	-0.440305	0.7521	0.998514	no
AT1G31190.1	1:11144771-11147547	COI0	38600	OK	33.9563	48.3827	0.510814	2.01884	0.0718	0.887156	no
AT1G06423.1	1:11144771-11147547	COI0	38600	OK	4.39128	4.22987	-0.0540288	-0.00824824	0.4582	0.998514	no
AT1G31220.1	1:11156697-11163274	COI0	38600	OK	11.0214	13.5318	0.296046	0.480479	0.7158	0.998514	no
AT1G31243.1	1:11163857-11165022	COI0	38600	OK	10.3191	10.8219	0.0686271	0.0753309	0.9444	0.998514	no
AT1G06427.1	1:11169449-11170396	COI0	38600	NOTEST	0	0	0	0	1	1	no
AT1G31258.1	1:11171224-11171835	COI0	38600	NOTEST	0	0	0	0	1	1	no
AT1G31270.1	1:11178348-11179203	COI0	38600	NOTEST	0.114099	0	#NAME?	0	1	1	no
AT1G31280.1	1:11181503-11185396	COI0	38600	OK	9.26094	7.21546	-0.360067	-1.11922	0.2293	0.998514	no
AT1G31290.1,AT1G31290.2,AT1G31290.3	1:11188119-11192585	COI0	38600	OK	0.516948	1.31569	1.34773	2.23158	0.03175	0.654521	no
AT1G31300.1,AT1G31300.2,AT1G31300.3	1:11193624-11196397	COI0	38600	OK	15.0743	25.3884	0.752078	2.25192	0.0239	0.579784	no
AT1G06433.1	1:11197611-11198128	COI0	38600	NOTEST	0	0	0	0	1	1	no
AT1G31320.1	1:11212957-11214567	COI0	38600	OK	8.17971	8.39558	0.0375797	0.108494	0.92695	0.998514	no
AT1G31360.1,AT1G31360.2,AT1G31360.3,AT1G31360.4,AT1G31360.5,AT1G31360.6,AT1G31360.7,AT1G31360.8	1:11232317-11237594	COI0	38600	OK	8.75701	8.88337	0.0206685	0.059989	0.953	0.998514	no
AT1G06437.1	1:11241228-11241474	COI0	38600	NOTEST	0	0	0	0	1	1	no
AT1G31420.1,AT1G31420.2,AT1G31420.3	1:11249599-11255745	COI0	38600	OK	74.512	77.9203	0.0645271	0.281331	0.8148	0.998514	no
AT1G31480.1	1:11265815-11273294	COI0	38600	OK	10.2178	9.35651	-0.127043	-0.400254	0.7181	0.998514	no
AT1G31510.1	1:11277416-11278462	COI0	38600	NOTEST	0	0	0	0	1	1	no
AT1G06447.1	1:11300617-11301038	COI0	38600	NOTEST	0	0	0	0	1	1	no
AT1G31580.1	1:11310996-11311989	COI0	38600	OK	806.701	366.617	-1.13776	-6.03063	0.00055	0.0583456	no
AT1G31620.1	1:11316940-11317894	COI0	38600	NOTEST	0	0	0	0	1	1	no
AT1G31670.1	1:11337535-11341889	COI0	38600	NOTEST	0	0	0	0	1	1	no
AT1G31690.1	1:11343853-11347945	COI0	38600	NOTEST	0.412996	0.205321	-1.00825	0	1	1	no
AT1G31710.1	1:11349696-11355587	COI0	38600	OK	15.7308	15.1005	-0.058994	-0.186441	0.8385	0.998514	no
AT1G31720.1,AT1G31720.2,AT1G31720.3,AT1G31720.4,AT1G31720.5,AT1G31720.6,AT1G31720.7	1:11356075-11358095	COI0	38600	OK	1.05938	0.799555	-0.405952	-0.320978	0.679	0.998514	no
AT1G31730.1	1:11359511-11364288	COI0	38600	OK	29.3033	32.8848	0.166358	0.723434	0.5547	0.998514	no
AT1G31772.1,AT1G31772.2	1:11374759-11379734	COI0	38600	NOTEST	0	0	0	0	1	1	no
AT1G31780.1	1:11391198-11396018	COI0	38600	OK	15.2569	13.6735	-0.158084	-0.515806	0.60215	0.998514	no
AT1G31800.1	1:11396401-11406809	COI0	38600	OK	52.6752	72.4106	0.459077	1.69973	0.15315	0.998514	no
AT1G31840.1,AT1G31840.2	1:11423905-11426818	COI0	38600	OK	0.877042	1.13083	0.366665	0.510807	0.612	0.998514	no
AT1G31850.1,AT1G31850.2,AT1G31850.3,AT1G31850.4	1:11430099-11436607	COI0	38600	OK	24.8894	21.5422	-0.208364	-0.628442	0.5776	0.998514	no
AT1G31870.1,AT1G31870.2	1:11436718-11440275	COI0	38600	OK	17.4488	19.7752	0.180565	0.62468	0.5148	0.998514	no
AT1G31880.1,AT1G31880.2	1:11445489-11450232	COI0	38600	OK	4.18095	3.92246	-0.0920715	-0.191713	0.8441	0.998514	no
AT1G31885.1,AT1G31885.2,AT1G31885.3	1:11450314-11452068	COI0	38600	OK	0.56459	0.944783	0.74278	0.711191	0.43965	0.998514	no
AT1G31910.1,AT1G31910.2	1:11456801-11463896	COI0	38600	OK	84.5103	82.677	-0.0316419	-0.114567	0.9237	0.998514	no
AT1G31930.1,AT1G31930.2,AT1G31930.3,AT1G31930.4,AT1G31930.5,AT1G31930.6	1:11464933-11469207	COI0	38600	OK	24.3302	25.2838	0.0554662	0.196194	0.8409	0.998514	no
AT1G31935.1	1:11469481-11470010	COI0	38600	OK	2.68753	2.51211	-0.0973772	-0.173531	0.92565	0.998514	no
AT1G31950.1,AT1G31950.2,AT1G31950.3	1:11475622-11478721	COI0	38600	OK	0.906938	0.99133	0.128362	0.128614	0.86995	0.998514	no
AT1G31970.1	1:11479762-11482890	COI0	38600	OK	128.224	148.326	0.210109	0.847069	0.4664	0.998514	no
AT1G31990.1	1:11488001-11489318	COI0	38600	NOTEST	0.0822907	0.562027	2.77184	0	1	1	no
AT1G06497.1	1:11497401-11497896	COI0	38600	NOTEST	0	0	0	0	1	1	no
AT1G06513.1	1:11498281-11498711	COI0	38600	NOTEST	0	0	0	0	1	1	no
AT1G06517.1,at1g06523	1:11499281-11499883	COI0	38600	NOTEST	0	0	0	0	1	1	no
AT1G32030.1	1:11514593-11515595	COI0	38600	NOTEST	0.0660222	0	#NAME?	0	1	1	no
AT1G32050.1	1:11528384-11531350	COI0	38600	OK	115.819	133.773	0.207911	1.1226	0.44915	0.998514	no
AT1G32060.1	1:11532198-11536437	COI0	38600	OK	618.029	831.537	0.428106	0.934233	0.33505	0.998514	no
AT1G32120.1	1:11552425-11556391	COI0	38600	OK	2.48786	1.50466	-0.725468	-1.69545	0.1045	0.98551	no
AT1G32127.1,AT1G32127.2	1:11556743-11558702	COI0	38600	OK	5.76353	4.82273	-0.257104	-0.454602	0.6537	0.998514	no
AT1G32150.1,AT1G32160.1	1:11565493-11570438	COI0	38600	OK	57.43	66.3831	0.209013	0.730939	0.4615	0.998514	no
AT1G32170.1	1:11575319-11578030	COI0	38600	OK	6.54987	11.6382	0.829333	2.39235	0.0391	0.709415	no
AT1G32172.1	1:11578505-11580547	COI0	38600	NOTEST	0.127721	0.0486824	-1.39152	0	1	1	no
AT1G06527.1	1:11598338-11598718	COI0	38600	NOTEST	0	0	0	0	1	1	no
AT1G06533.1	1:11601120-11601334	COI0	38600	NOTEST	0	0	0	0	1	1	no
AT1G32220.1	1:11605605-11609968	COI0	38600	OK	48.0007	85.4494	0.832014	2.53138	0.0107	0.385069	no
AT1G32225.1	1:11610113-11610625	COI0	38600	NOTEST	0	0.582346	inf	0	1	1	no
AT1G32230.1,AT1G32230.2,AT1G32230.3,AT1G32230.4,AT1G32230.5,AT1G32230.6	1:11611890-11617419	COI0	38600	OK	88.4181	82.4641	-0.100576	-0.344458	0.72505	0.998514	no
AT1G32250.1	1:11639740-11640393	COI0	38600	OK	0.980639	0	#NAME?	#NAME?	0.0019	0.138275	no
AT1G32270.1,AT1G32270.2	1:11642592-11645237	COI0	38600	NOTEST	0.111299	0.0628658	-0.824092	0	1	1	no
AT1G32280.1	1:11646188-11647001	COI0	38600	NOTEST	0.231624	0	#NAME?	0	1	1	no
AT1G32300.1	1:11651326-11653380	COI0	38600	OK	0.831784	0	#NAME?	#NAME?	5e-05	0.00838689	yes
AT1G32310.1	1:11653499-11654833	COI0	38600	OK	15.3522	15.8101	0.0424052	0.170312	0.92975	0.998514	no
AT1G32320.1	1:11655155-11656073	COI0	38600	NOTEST	0.095281	0	#NAME?	0	1	1	no
AT1G32337.1	1:11661814-11662122	COI0	38600	NOTEST	0	0	0	0	1	1	no
AT1G32360.1	1:11672765-11675387	COI0	38600	OK	16.319	17.7608	0.122147	0.451027	0.6868	0.998514	no
AT1G32361.1	1:11675530-11676748	COI0	38600	NOTEST	0.0746052	0	#NAME?	0	1	1	no
AT1G32370.1,AT1G32370.2,AT1G32370.3,AT1G32370.4	1:11676924-11680839	COI0	38600	OK	16.8603	16.0514	-0.0709301	-0.300222	0.852	0.998514	no
AT1G32375.1,AT1G32375.2	1:11676924-11680839	COI0	38600	NOTEST	0.301093	0.46109	0.614839	0	1	1	no
AT1G32380.1,AT1G32380.2	1:11681733-11684520	COI0	38600	OK	22.3825	20.5955	-0.120043	-0.382441	0.70125	0.998514	no
AT1G06547.1	1:11684909-11684994	COI0	38600	NOTEST	0	0	0	0	1	1	no
AT1G32385.1	1:11685059-11685144	COI0	38600	NOTEST	0	0	0	0	1	1	no
AT1G06553.1	1:11685234-11685376	COI0	38600	NOTEST	0	0	0	0	1	1	no
AT1G06557.1	1:11686327-11686618	COI0	38600	NOTEST	0	0	0	0	1	1	no
AT1G32410.1,AT1G32410.2,AT1G32410.3,AT1G32410.4,AT1G32410.5,AT1G32415.1	1:11693798-11697964	COI0	38600	OK	38.5342	33.3322	-0.209226	-0.924335	0.52675	0.998514	no
AT1G32420.1	1:11701994-11702903	COI0	38600	NOTEST	0.444458	0	#NAME?	0	1	1	no
AT1G32440.1	1:11711943-11719988	COI0	38600	OK	26.3637	40.6363	0.624215	1.58101	0.18225	0.998514	no
AT1G32460.1	1:11738117-11740399	COI0	38600	OK	5.99642	3.03459	-0.982601	-0.541119	0.7321	0.998514	no
AT1G32480.1	1:11741082-11741990	COI0	38600	NOTEST	0	0	0	0	1	1	no
AT1G32510.1	1:11756690-11758118	COI0	38600	NOTEST	0.191378	0	#NAME?	0	1	1	no
AT1G32540.1,AT1G32540.2,AT1G32540.3,AT1G32540.4,AT1G32540.5,AT1G32540.6,AT1G32540.7	1:11767484-11770049	COI0	38600	OK	13.2084	11.0211	-0.261185	-0.688186	0.48205	0.998514	no
AT1G32560.1	1:11774483-11775442	COI0	38600	OK	0.640795	1.44619	1.17432	1.59124	0.28445	0.998514	no
AT1G32570.1,AT1G32570.2	1:11776764-11777557	COI0	38600	OK	1.89851	0.282801	-2.747	-1.26998	0.14025	0.998514	no
AT1G06587.1	1:11779271-11779894	COI0	38600	OK	8.30581	9.57245	0.204768	0.167214	0.87615	0.998514	no
AT1G32575.1	1:11780622-11781965	COI0	38600	NOTEST	0.555893	0	#NAME?	0	1	1	no
AT1G32580.1	1:11783542-11785704	COI0	38600	OK	54.8053	55.6635	0.022416	0.105555	0.9362	0.998514	no
AT1G32583.1,AT1G32583.2	1:11785805-11788286	COI0	38600	OK	4.99534	4.37073	-0.19271	-0.302919	0.713	0.998514	no
at1g32582	1:11785805-11788286	COI0	38600	NOTEST	0	0	0	0	1	1	no
AT1G32600.1	1:11794801-11797285	COI0	38600	NOTEST	0	0	0	0	1	1	no
AT1G32630.1,AT1G32630.2	1:11797329-11801407	COI0	38600	OK	3.49495	3.48751	-0.00307479	-0.00382821	0.99635	0.998514	no
AT1G32660.1	1:11811039-11812380	COI0	38600	NOTEST	0.0751916	0	#NAME?	0	1	1	no
AT1G32700.1,AT1G32700.2	1:11827358-11829933	COI0	38600	OK	88.6568	92.4266	0.0600759	0.213119	0.8303	0.998514	no
AT1G32710.1	1:11833112-11833706	COI0	38600	NOTEST	0	0	0	0	1	1	no
AT1G32720.1	1:11834901-11836631	COI0	38600	NOTEST	0	0	0	0	1	1	no
AT1G32730.1	1:11840909-11843308	COI0	38600	OK	7.09631	6.04659	-0.230948	-0.628436	0.58705	0.998514	no
AT1G32740.1,AT1G32740.2,AT1G32740.3,AT1G32740.4	1:11844659-11856943	COI0	38600	OK	4.35359	3.39182	-0.360147	-0.25677	0.77995	0.998514	no
AT1G06613.1	1:11844659-11856943	COI0	38600	OK	1.02115	3.69259	1.85444	0.274179	0.47765	0.998514	no
AT1G32760.1	1:11858079-11859468	COI0	38600	OK	5.2781	4.37244	-0.271581	-0.630699	0.552	0.998514	no
AT1G06617.1	1:11873273-11873480	COI0	38600	NOTEST	0	0	0	0	1	1	no
AT1G32810.2	1:11881310-11886015	COI0	38600	OK	13.6502	15.9898	0.228228	0.825833	0.41555	0.998514	no
at1g06623	1:11901408-11901520	COI0	38600	NOTEST	0	0	0	0	1	1	no
AT1G32850.1	1:11902628-11909049	COI0	38600	NOTEST	0.240075	0.174439	-0.460757	0	1	1	no
AT1G32870.1,AT1G32870.2,AT1G32870.3	1:11911630-11914735	COI0	38600	OK	15.2006	17.9847	0.242647	0.821991	0.42485	0.998514	no
AT1G32910.1	1:11925319-11927302	COI0	38600	NOTEST	0	0	0	0	1	1	no
AT1G06633.1	1:11927721-11928260	COI0	38600	NOTEST	0	0	0	0	1	1	no
AT1G32920.1	1:11928756-11929993	COI0	38600	OK	59.5113	54.2761	-0.132847	-0.955762	0.663	0.998514	no
AT1G32928.1	1:11931148-11931801	COI0	38600	OK	14.1858	9.83487	-0.528473	-1.87805	0.32545	0.998514	no
AT1G32940.1,AT1G32940.2,AT1G32940.3,AT1G32940.4,AT1G32950.1,AT1G32950.2	1:11937182-11944982	COI0	38600	OK	8.4768	8.41746	-0.010135	-0.0314384	0.97425	0.998514	no
AT1G32960.1	1:11945249-11951982	COI0	38600	OK	1.0751	0.555184	-0.953439	-1.48988	0.18885	0.998514	no
AT1G32975.1	1:11953088-11953899	COI0	38600	NOTEST	0	0	0	0	1	1	no
AT1G32990.1	1:11955655-11957402	COI0	38600	OK	96.1186	145.004	0.593208	2.202	0.03735	0.700771	no
at1g32992	1:11957459-11957730	COI0	38600	NOTEST	0	0	0	0	1	1	no
AT1G33010.1	1:11959286-11960591	COI0	38600	NOTEST	0	0	0	0	1	1	no
AT1G33020.1	1:11962745-11966320	COI0	38600	NOTEST	0	0	0	0	1	1	no
AT1G33040.1	1:11966422-11972580	COI0	38600	OK	86.8069	107.812	0.312638	1.10334	0.4035	0.998514	no
AT1G33070.1	1:11982888-11985299	COI0	38600	NOTEST	0	0	0	0	1	1	no
AT1G33080.1,AT1G33080.2	1:11985649-11990520	COI0	38600	OK	6.88064	6.205	-0.149112	-0.340827	0.7267	0.998514	no
AT1G33090.1	1:11993297-11996712	COI0	38600	NOTEST	0	0	0	0	1	1	no
AT1G33100.1	1:11997499-12001421	COI0	38600	NOTEST	0.217247	0	#NAME?	0	1	1	no
AT1G33110.1,AT1G33110.2	1:12004853-12008852	COI0	38600	OK	78.1001	73.6206	-0.0852132	-0.308246	0.7493	0.998514	no
AT1G33120.1	1:12010878-12012547	COI0	38600	OK	47.854	51.7312	0.112395	0.37468	0.70355	0.998514	no
AT1G33140.1	1:12023224-12024783	COI0	38600	OK	87.1489	82.594	-0.077446	-0.273511	0.78145	0.998514	no
AT1G33170.1	1:12026935-12030539	COI0	38600	OK	23.6702	22.4361	-0.0772498	-0.316445	0.77905	0.998514	no
at1g06653	1:12035046-12035135	COI0	38600	NOTEST	0	0	0	0	1	1	no
AT1G06657.1	1:12037163-12037653	COI0	38600	NOTEST	0	0	0	0	1	1	no
AT1G33220.1	1:12044871-12045879	COI0	38600	NOTEST	0	0	0	0	1	1	no
AT1G33230.1,AT1G33230.2	1:12046378-12050095	COI0	38600	OK	36.9939	32.6625	-0.179653	-0.618526	0.529	0.998514	no
AT1G33260.1,AT1G33260.2	1:12064322-12066454	COI0	38600	OK	2.97409	3.05317	0.0378593	0.067193	0.94695	0.998514	no
AT1G33265.1	1:12066594-12070455	COI0	38600	OK	22.992	19.319	-0.251114	-0.752695	0.63415	0.998514	no
AT1G33280.1	1:12072610-12073965	COI0	38600	NOTEST	0.140544	0.0845997	-0.732294	0	1	1	no
AT1G33290.1,AT1G33290.2,AT1G33290.3	1:12074098-12076289	COI0	38600	OK	32.2617	39.7555	0.301331	1.01676	0.2913	0.998514	no
AT1G33320.1,AT1G33320.3	1:12081008-12083619	COI0	38600	NOTEST	0.0769957	0	#NAME?	0	1	1	no
AT1G06667.1	1:12083968-12084054	COI0	38600	NOTEST	0	0	0	0	1	1	no
AT1G33330.1,AT1G33330.2,AT1G33330.3	1:12084913-12086883	COI0	38600	OK	13.4579	10.9647	-0.295585	-0.752731	0.4458	0.998514	no
AT1G33340.1	1:12087195-12088999	COI0	38600	OK	3.46296	2.98603	-0.213777	-0.572123	0.687	0.998514	no
AT1G33355.1	1:12089248-12091743	COI0	38600	NOTEST	0	0	0	0	1	1	no
AT1G33360.1	1:12091779-12096486	COI0	38600	OK	11.4641	10.5721	-0.116864	-0.437472	0.69775	0.998514	no
AT1G33415.1,AT1G33415.2,AT1G33415.3,AT1G33415.4,AT1G33415.5	1:12118989-12126651	COI0	38600	OK	3.86468	4.36324	0.175048	0.258921	0.84475	0.998514	no
AT1G33470.1,AT1G33470.2,AT1G33470.3	1:12144439-12148380	COI0	38600	OK	32.509	33.096	0.0258185	0.102886	0.92535	0.998514	no
AT1G33500.1,AT1G33500.2,AT1G33500.3	1:12152518-12154921	COI0	38600	OK	0.930909	0.691751	-0.428387	-0.418465	0.6521	0.998514	no
AT1G33530.1	1:12159883-12161314	COI0	38600	NOTEST	0	0	0	0	1	1	no
AT1G33560.1	1:12168767-12172119	COI0	38600	OK	12.7616	15.0877	0.241562	1.01448	0.4243	0.998514	no
AT1G33590.2	1:12177672-12179628	COI0	38600	OK	58.8533	39.7063	-0.567757	-2.03361	0.0352	0.682845	no
AT1G33600.1,AT1G33600.2	1:12180482-12184528	COI0	38600	OK	29.1491	25.779	-0.177256	-0.613214	0.52915	0.998514	no
AT1G33610.1	1:12188677-12190461	COI0	38600	OK	2.4188	3.39405	0.488714	0.975099	0.32115	0.998514	no
AT1G33612.1	1:12191132-12197020	COI0	38600	NOTEST	0.522906	0.521214	-0.00467691	0	1	1	no
AT1G06687.1	1:12199358-12199789	COI0	38600	NOTEST	1.79677	0.757563	-1.24597	0	1	1	no
AT1G06693.1	1:12200426-12200747	COI0	38600	NOTEST	0	0	0	0	1	1	no
AT1G33670.1	1:12201962-12203408	COI0	38600	NOTEST	0	0	0	0	1	1	no
AT1G33680.1	1:12203944-12214313	COI0	38600	OK	33.2359	38.5844	0.215274	0.617661	0.47155	0.998514	no
AT1G33710.1	1:12219656-12220289	COI0	38600	NOTEST	0	0	0	0	1	1	no
AT1G33730.1,AT1G33730.2	1:12226851-12228556	COI0	38600	NOTEST	0.137642	0.121488	-0.180109	0	1	1	no
AT1G06707.1	1:12232826-12233266	COI0	38600	NOTEST	0	0	0	0	1	1	no
AT1G33750.1	1:12233631-12236576	COI0	38600	NOTEST	0.441759	0.211803	-1.06054	0	1	1	no
AT1G33760.1	1:12237546-12238710	COI0	38600	OK	0	1.38238	inf	#NAME?	0.00015	0.0209772	yes
AT1G33770.1	1:12241613-12246231	COI0	38600	NOTEST	0.629224	0.722991	0.200405	0	1	1	no
AT1G33790.1,AT1G33790.2,AT1G33790.3,AT1G33790.4,AT1G33790.5,AT1G33790.6	1:12256473-12260638	COI0	38600	OK	14.089	7.84803	-0.844165	-2.49604	0.0126	0.422459	no
AT1G33800.1	1:12261164-12262750	COI0	38600	OK	5.07195	6.84307	0.432105	1.11066	0.3082	0.998514	no
AT1G33810.1	1:12264941-12266920	COI0	38600	OK	55.5953	77.9767	0.488079	2.56717	0.1031	0.983332	no
AT1G33811.1	1:12267807-12269913	COI0	38600	OK	40.2797	40.1816	-0.00351975	-0.0131732	0.99035	0.998514	no
AT1G33860.1,AT1G33860.2	1:12294393-12295305	COI0	38600	NOTEST	0	0	0	0	1	1	no
AT1G33910.1	1:12314903-12316258	COI0	38600	NOTEST	0	0	0	0	1	1	no
AT1G33920.1	1:12319904-12320870	COI0	38600	NOTEST	0	0	0	0	1	1	no
AT1G33930.1	1:12323473-12327311	COI0	38600	OK	2.15605	2.44053	0.178807	0.349196	0.77775	0.998514	no
AT1G33945.1	1:12330575-12340409	COI0	38600	NOTEST	0	0	0	0	1	1	no
AT1G33960.2	1:12346137-12348733	COI0	38600	OK	1.05136	0.986052	-0.092517	-0.117348	0.9062	0.998514	no
AT1G33980.1,AT1G33980.2	1:12351565-12355173	COI0	38600	OK	26.3445	26.2659	-0.00430806	-0.0151862	0.9863	0.998514	no
AT1G33990.1	1:12355556-12358966	COI0	38600	OK	67.7911	62.9399	-0.107121	-0.313169	0.8057	0.998514	no
AT1G06717.1	1:12355556-12358966	COI0	38600	OK	0.682864	1.0087	0.56283	0.0382888	0.13985	0.998514	no
AT1G06723.1	1:12361352-12361763	COI0	38600	NOTEST	0	0	0	0	1	1	no
AT1G34015.1	1:12361831-12363493	COI0	38600	NOTEST	0	0	0	0	1	1	no
AT1G34020.1,AT1G34020.2,AT1G34020.3	1:12366809-12370014	COI0	38600	OK	14.0503	15.211	0.114512	0.313433	0.7445	0.998514	no
AT1G34040.1,AT1G34040.2	1:12374258-12376367	COI0	38600	OK	1.26482	0.731779	-0.789451	-0.920707	0.33605	0.998514	no
AT1G06727.1	1:12381196-12381406	COI0	38600	NOTEST	0	0	0	0	1	1	no
AT1G06733.1	1:12381939-12382144	COI0	38600	NOTEST	0	0	0	0	1	1	no
AT1G06743.1	1:12384321-12385041	COI0	38600	NOTEST	0	0	0	0	1	1	no
AT1G34046.1	1:12388594-12389447	COI0	38600	NOTEST	0	0	0	0	1	1	no
AT1G34049.1	1:12390237-12391149	COI0	38600	NOTEST	0	0	0	0	1	1	no
AT1G34050.1	1:12393425-12396194	COI0	38600	NOTEST	0	0	0	0	1	1	no
AT1G34070.1	1:12402282-12403209	COI0	38600	NOTEST	0	0	0	0	1	1	no
AT1G34120.1,AT1G34120.2,AT1G34120.3,AT1G34120.4,AT1G34120.5	1:12426699-12429714	COI0	38600	OK	7.0243	6.28333	-0.160824	-0.42088	0.66195	0.998514	no
AT1G34130.1	1:12429845-12433236	COI0	38600	OK	24.1974	23.1872	-0.061519	-0.309772	0.83105	0.998514	no
AT1G34150.1	1:12435881-12439499	COI0	38600	OK	11.0679	10.9796	-0.0115581	-0.0379908	0.9711	0.998514	no
AT1G34160.1,AT1G34160.2	1:12441243-12443368	COI0	38600	OK	3.00893	3.62742	0.269693	0.544333	0.58475	0.998514	no
AT1G34180.1,AT1G34180.2,AT1G34180.3,AT1G34180.4	1:12448542-12451287	COI0	38600	OK	3.1091	2.5506	-0.285662	-0.546601	0.57115	0.998514	no
AT1G34190.1	1:12451404-12454542	COI0	38600	OK	36.7322	38.8528	0.080973	0.362507	0.77585	0.998514	no
AT1G34200.1	1:12455652-12457547	COI0	38600	OK	15.248	9.72125	-0.64941	-2.73452	0.0731	0.892912	no
AT1G34210.1,AT1G34210.2	1:12458563-12466089	COI0	38600	OK	29.0546	30.4437	0.0673774	0.236942	0.8415	0.998514	no
AT1G34245.1	1:12472867-12473974	COI0	38600	OK	4.37212	3.72097	-0.232655	-0.468208	0.70595	0.998514	no
AT1G34260.1,AT1G34260.2,AT1G34260.3,AT1G34260.4	1:12485317-12492207	COI0	38600	OK	6.12822	6.58784	0.104336	0.328159	0.73885	0.998514	no
AT1G34290.1	1:12497999-12498800	COI0	38600	NOTEST	0	0	0	0	1	1	no
AT1G34300.1	1:12503359-12506172	COI0	38600	OK	12.0076	10.9136	-0.137823	-0.518271	0.651	0.998514	no
AT1G06747.1	1:12512324-12512684	COI0	38600	NOTEST	0	0	0	0	1	1	no
AT1G34317.1	1:12514105-12516555	COI0	38600	NOTEST	0	0	0	0	1	1	no
AT1G34320.1,AT1G34320.2	1:12520058-12524377	COI0	38600	OK	29.0244	26.8695	-0.111297	-0.395974	0.6831	0.998514	no
AT1G34340.1	1:12530814-12534306	COI0	38600	OK	9.2251	7.44892	-0.308533	-0.849592	0.36095	0.998514	no
AT1G34350.1,AT1G34350.2	1:12534425-12536162	COI0	38600	OK	20.3213	24.5469	0.272544	0.713279	0.46835	0.998514	no
AT1G34355.1,AT1G34355.2,AT1G34355.3	1:12536309-12541938	COI0	38600	OK	0.992799	1.18957	0.260871	0.524608	0.59885	0.998514	no
AT1G34360.1,AT1G34360.2,AT1G34360.3	1:12542795-12546244	COI0	38600	OK	7.69962	8.77964	0.189374	0.546584	0.5796	0.998514	no
AT1G34370.1,AT1G34370.2,AT1G34370.3	1:12550338-12552629	COI0	38600	OK	33.2306	34.5177	0.0548237	0.180504	0.8437	0.998514	no
AT1G34390.1	1:12556004-12559082	COI0	38600	NOTEST	0	0	0	0	1	1	no
AT1G34410.1	1:12577721-12580824	COI0	38600	NOTEST	0.0513789	0	#NAME?	0	1	1	no
AT1G34418.1	1:12582121-12582721	COI0	38600	OK	38.8095	26.737	-0.537574	-2.6661	0.21405	0.998514	no
AT1G34420.1	1:12584344-12590223	COI0	38600	OK	2.13955	1.99386	-0.101746	-0.113653	0.9156	0.998514	no
AT1G34460.1,AT1G34460.2,AT1G34460.3,AT1G34460.4,AT1G34460.5,AT1G34460.6,AT1G34460.7,AT1G34460.8,AT1G34460.9	1:12595109-12602379	COI0	38600	OK	1.05985	0.844237	-0.328138	-0.417083	0.61895	0.998514	no
AT1G34470.1	1:12604160-12607033	COI0	38600	OK	13.3226	9.72294	-0.454416	-2.02948	0.2309	0.998514	no
AT1G34480.1	1:12607221-12609084	COI0	38600	NOTEST	0.0602152	0.274138	2.18671	0	1	1	no
AT1G34490.1	1:12609439-12610495	COI0	38600	NOTEST	0	0	0	0	1	1	no
AT1G34500.1	1:12611637-12612663	COI0	38600	NOTEST	0	0	0	0	1	1	no
AT1G34520.1	1:12623433-12624508	COI0	38600	NOTEST	0	0	0	0	1	1	no
AT1G34540.1	1:12637053-12638692	COI0	38600	NOTEST	0.0428305	0	#NAME?	0	1	1	no
AT1G06783.1	1:12643647-12643997	COI0	38600	NOTEST	0	0	0	0	1	1	no
AT1G34560.1	1:12653960-12654779	COI0	38600	NOTEST	0	0	0	0	1	1	no
AT1G34580.1,AT1G34580.2	1:12660496-12663870	COI0	38600	NOTEST	0.584872	0.441293	-0.406383	0	1	1	no
AT1G34630.1,AT1G34630.2,AT1G34630.3,AT1G34630.4,AT1G34630.5	1:12685175-12688543	COI0	38600	OK	12.2988	15.2988	0.314898	1.0326	0.44865	0.998514	no
AT1G34650.1	1:12692994-12697834	COI0	38600	NOTEST	0	0.111682	inf	0	1	1	no
AT1G34670.1	1:12709089-12710665	COI0	38600	NOTEST	0.453548	0.394921	-0.199691	0	1	1	no
AT1G34770.1,AT1G34770.2,AT1G34770.3,AT1G34770.4,AT1G34770.5,AT1G34770.6	1:12746404-12750506	COI0	38600	OK	6.06719	9.58924	0.660388	1.57419	0.311	0.998514	no
AT1G34844.1,AT1G34844.2,AT1G34844.3	1:12751155-12752905	COI0	38600	OK	5.84717	5.65978	-0.0469915	-0.107613	0.91085	0.998514	no
AT1G34790.1	1:12763901-12765686	COI0	38600	NOTEST	0.209188	0	#NAME?	0	1	1	no
AT1G06797.1	1:12767250-12767754	COI0	38600	NOTEST	0	0	0	0	1	1	no
AT1G34807.1	1:12777710-12778231	COI0	38600	NOTEST	0	0	0	0	1	1	no
AT1G34812.1	1:12781125-12781766	COI0	38600	NOTEST	0	0	0	0	1	1	no
AT1G34817.1	1:12784535-12785176	COI0	38600	NOTEST	0	0	0	0	1	1	no
AT1G34822.1	1:12787949-12788590	COI0	38600	NOTEST	0	0	0	0	1	1	no
AT1G34827.1	1:12791363-12791884	COI0	38600	NOTEST	0	0	0	0	1	1	no
AT1G34855.1	1:12801426-12802067	COI0	38600	NOTEST	0	0	0	0	1	1	no
AT1G34910.1	1:12804833-12805334	COI0	38600	NOTEST	0	0	0	0	1	1	no
AT1G35030.1	1:12808245-12809481	COI0	38600	NOTEST	0	0	0	0	1	1	no
AT1G35040.1	1:12812156-12812569	COI0	38600	NOTEST	0	0	0	0	1	1	no
AT1G35140.1	1:12851982-12853235	COI0	38600	OK	5.50586	21.9055	1.99225	4.76027	5e-05	0.00838689	yes
AT1G35160.1,AT1G35160.2	1:12867080-12868890	COI0	38600	OK	80.8314	64.6369	-0.322557	-1.14144	0.23935	0.998514	no
AT1G35181.1	1:12879305-12879470	COI0	38600	NOTEST	0	0	0	0	1	1	no
AT1G35183.1,AT1G35183.2,AT1G35183.3	1:12882653-12884762	COI0	38600	OK	0.936331	0.478144	-0.969574	-0.129878	0.74945	0.998514	no
AT1G06817.1	1:12887308-12887969	COI0	38600	NOTEST	0	0	0	0	1	1	no
AT1G35190.1,AT1G35190.2	1:12890403-12892955	COI0	38600	OK	29.2734	27.4651	-0.0919897	-0.298835	0.7569	0.998514	no
AT1G06827.1	1:12907869-12908342	COI0	38600	NOTEST	0	0	0	0	1	1	no
AT1G35220.1,AT1G35220.2,AT1G35220.3,AT1G35220.4,AT1G35220.5,AT1G35220.7	1:12908847-12914858	COI0	38600	OK	11.3801	11.9295	0.068022	0.226506	0.8155	0.998514	no
AT1G35230.1	1:12917069-12917829	COI0	38600	OK	5.75123	3.96015	-0.538315	-1.14374	0.38185	0.998514	no
AT1G06837.1	1:12923004-12923585	COI0	38600	OK	2.00544	2.46839	0.299648	0.646466	0.7799	0.998514	no
AT1G35242.1	1:12930979-12931555	COI0	38600	NOTEST	0	0.361954	inf	0	1	1	no
AT1G35330.1	1:12964985-12966113	COI0	38600	NOTEST	0.202921	0.336302	0.728841	0	1	1	no
AT1G06857.1	1:12972057-12972468	COI0	38600	NOTEST	0	0	0	0	1	1	no
AT1G35340.1,AT1G35340.2,AT1G35340.3,AT1G35340.4,AT1G35340.5,AT1G35340.6,AT1G35340.7	1:12977667-12979947	COI0	38600	OK	54.0072	55.8246	0.0477511	0.16777	0.86095	0.998514	no
AT1G06873.1	1:12986719-12987066	COI0	38600	NOTEST	0	0	0	0	1	1	no
AT1G06877.1	1:12987189-12987313	COI0	38600	NOTEST	0	0	0	0	1	1	no
AT1G35353.1	1:12988648-12989373	COI0	38600	NOTEST	0	0	0	0	1	1	no
AT1G35365.1	1:12991391-12992145	COI0	38600	NOTEST	0	0	0	0	1	1	no
AT1G35400.1	1:13018288-13019198	COI0	38600	NOTEST	0	0	0	0	1	1	no
AT1G35410.1	1:13024160-13024941	COI0	38600	NOTEST	0	0	0	0	1	1	no
AT1G35420.1,AT1G35420.2,AT1G35420.3	1:13026205-13027691	COI0	38600	OK	61.8818	59.8111	-0.0491021	-0.174558	0.85965	0.998514	no
AT1G35460.1,AT1G35460.2	1:13039659-13042159	COI0	38600	OK	24.9282	29.4432	0.240156	0.781478	0.4255	0.998514	no
AT1G35467.1	1:13049113-13049437	COI0	38600	NOTEST	0	0	0	0	1	1	no
AT1G35490.1,AT1G35490.2	1:13061548-13063455	COI0	38600	OK	2.56006	0	#NAME?	#NAME?	5e-05	0.00838689	yes
AT1G35500.1	1:13066086-13066596	COI0	38600	NOTEST	0	0	0	0	1	1	no
at1g35501	1:13067250-13067335	COI0	38600	NOTEST	0	0	0	0	1	1	no
AT1G35510.1	1:13071164-13074984	COI0	38600	OK	20.234	18.6548	-0.117241	-0.495804	0.6959	0.998514	no
[truncated: 29,160 more rows]

## Sheet: Without Pt and Mt
Genes	Locus	Control	Treatment	Status	FPKM_Control	FPKM_Treatment	log2(fold_change)	test_stat	p_value	q_value	significant
AT1G01010.1	1:3630-5899	COI0	38600	OK	10.3874	9.06021	-0.197224	-0.581123	0.5708	0.998514	no
AT1G01020.1	1:6787-9130	COI0	38600	OK	13.8005	17.9013	0.375337	0.895291	0.36845	0.998514	no
AT1G01030.1	1:11648-13714	COI0	38600	OK	3.52201	3.86766	0.135062	0.307669	0.75415	0.998514	no
AT1G01040.1	1:23120-33171	COI0	38600	OK	16.3265	14.9709	-0.125055	-0.336268	0.7545	0.998514	no
at1g01046	1:23120-33171	COI0	38600	OK	26.1148	24.5246	-0.0906403	-0.258599	0.4187	0.998514	no
AT1G01050.1	1:23120-33171	COI0	38600	OK	107.143	104.782	-0.032152	-0.0725196	0.94375	0.998514	no
AT1G01060.1	1:33364-37871	COI0	38600	OK	278.02	290.06	0.0611626	0.172642	0.85845	0.998514	no
AT1G01070.1	1:38443-41017	COI0	38600	OK	26.767	16.8657	-0.666365	-2.1036	0.03495	0.682041	no
AT1G01080.1	1:44969-47059	COI0	38600	OK	34.1992	52.9001	0.629308	2.19346	0.0253	0.593215	no
AT1G01090.1	1:47233-49304	COI0	38600	OK	109.462	117.41	0.101118	0.481895	0.7191	0.998514	no
AT1G01100.1	1:49908-51210	COI0	38600	OK	332.048	248.121	-0.42035	-1.483	0.12805	0.998514	no
AT1G01110.1	1:51952-54737	COI0	38600	OK	2.94118	3.06927	0.0615041	0.140553	0.8872	0.998514	no
AT1G01120.1	1:57163-59215	COI0	38600	OK	42.2019	66.003	0.645225	2.47128	0.0223	0.56446	no
AT1G01130.1	1:61904-63811	COI0	38600	OK	13.8508	9.68252	-0.516518	-2.0405	0.506	0.998514	no
AT1G01140.1	1:64165-67774	COI0	38600	OK	46.6562	57.977	0.313411	1.12723	0.25175	0.998514	no
AT1G01150.1	1:69910-72138	COI0	38600	NOTEST	0.181186	0.14086	-0.363208	0	1	1	no
AT1G01160.1	1:72338-74737	COI0	38600	OK	40.6053	41.9853	0.0482145	0.125548	0.8986	0.998514	no
AT1G01170.1	1:72338-74737	COI0	38600	OK	135.671	129.566	-0.0664298	-0.295438	0.87185	0.998514	no
AT1G01180.1	1:75389-76845	COI0	38600	OK	10.1333	8.44129	-0.263563	-0.654038	0.45295	0.998514	no
at1g01183	1:78926-79037	COI0	38600	NOTEST	0	0	0	0	1	1	no
AT1G01190.1	1:82983-84946	COI0	38600	OK	3.53174	3.58553	0.0218073	0.0436388	0.96335	0.998514	no
AT1G01200.1	1:86485-88409	COI0	38600	OK	1.62288	1.0589	-0.615981	-0.845657	0.41205	0.998514	no
AT1G01210.1	1:88621-90502	COI0	38600	OK	32.4482	31.8257	-0.0279471	-0.115065	0.93295	0.998514	no
AT1G01220.1	1:91341-95681	COI0	38600	OK	10.3553	12.8893	0.31581	1.03551	0.2906	0.998514	no
AT1G01225.1	1:95934-99240	COI0	38600	OK	28.5823	24.6767	-0.211969	-0.607738	0.55235	0.998514	no
AT1G01240.1	1:99864-101987	COI0	38600	OK	9.37613	11.7244	0.322453	0.867561	0.3826	0.998514	no
AT1G01250.1	1:104439-105330	COI0	38600	OK	2.08419	3.42495	0.716599	1.18046	0.29275	0.998514	no
AT1G01260.1	1:108945-111699	COI0	38600	OK	9.58252	7.98836	-0.262506	-0.792712	0.413	0.998514	no
AT1G01270.1	1:111889-111961	COI0	38600	NOTEST	0	0	0	0	1	1	no
AT1G01280.1	1:112262-113947	COI0	38600	OK	6.95978	2.43634	-1.51433	-3.01072	0.0028	0.176502	no
AT1G01290.1	1:114201-116407	COI0	38600	OK	23.7243	20.6565	-0.199767	-0.627027	0.5248	0.998514	no
AT1G01300.1	1:116783-118845	COI0	38600	OK	45.6352	30.4631	-0.583085	-1.78987	0.03795	0.705063	no
AT1G01305.1	1:119380-119997	COI0	38600	NOTEST	0	0	0	0	1	1	no
AT1G01310.1	1:120153-130577	COI0	38600	OK	0.97645	0.0746302	-3.70971	-0.107038	0.2317	0.998514	no
AT1G01320.1	1:120153-130577	COI0	38600	OK	109.293	166.458	0.606966	1.61149	0.09955	0.976525	no
AT1G01335.1	1:130735-130858	COI0	38600	NOTEST	0	0	0	0	1	1	no
AT1G01340.1	1:132269-135924	COI0	38600	OK	4.61843	3.3988	-0.442376	-1.00433	0.3098	0.998514	no
AT1G01350.1	1:136089-138162	COI0	38600	OK	25.9201	27.5661	0.0888214	0.322466	0.764	0.998514	no
AT1G01355.1	1:138488-139680	COI0	38600	NOTEST	0	0.135334	inf	0	1	1	no
AT1G01360.1	1:141869-143261	COI0	38600	OK	23.3725	24.1651	0.0481131	0.203856	0.88135	0.998514	no
AT1G01370.1	1:143488-146479	COI0	38600	OK	5.27733	4.4653	-0.24105	-0.493145	0.6107	0.998514	no
AT1G01380.1	1:147042-149848	COI0	38600	NOTEST	0.997	0.649085	-0.619188	0	1	1	no
AT1G01390.2	1:147042-149848	COI0	38600	OK	6.25714	5.29731	-0.240243	-0.577957	0.55155	0.998514	no
AT1G01400.1	1:150688-152210	COI0	38600	NOTEST	0.304816	0.186792	-0.70651	0	1	1	no
AT1G01410.1	1:153112-154198	COI0	38600	NOTEST	0	0	0	0	1	1	no
AT1G01420.2	1:154366-156178	COI0	38600	OK	14.0391	14.8862	0.084531	0.257285	0.79355	0.998514	no
AT1G01430.1	1:156476-158823	COI0	38600	OK	39.9321	54.5356	0.449651	1.80084	0.108	0.99413	no
AT1G01440.1	1:159627-162953	COI0	38600	OK	10.3013	14.5699	0.500166	1.7635	0.10025	0.977698	no
AT1G01448.1	1:163277-166353	COI0	38600	OK	6.20212	5.55119	-0.159965	-0.455183	0.6998	0.998514	no
AT1G01450.1	1:163277-166353	COI0	38600	OK	5.14544	5.51137	0.0991152	0.176525	0.85175	0.998514	no
AT1G01453.1	1:166588-168088	COI0	38600	NOTEST	0.369494	0.144821	-1.35128	0	1	1	no
AT1G01460.1	1:168558-171386	COI0	38600	NOTEST	0.188503	0	#NAME?	0	1	1	no
AT1G01470.1	1:171524-172948	COI0	38600	OK	54.9805	83.3753	0.600699	3.11812	0.03535	0.683503	no
AT1G01480.1	1:175705-178406	COI0	38600	OK	1.31007	1.82587	0.478942	0.758517	0.4487	0.998514	no
AT1G01490.1	1:180016-182749	COI0	38600	OK	84.14	75.3936	-0.158349	-0.566672	0.56255	0.998514	no
AT1G01500.1	1:185032-192436	COI0	38600	OK	49.1433	53.0179	0.109485	0.394359	0.7202	0.998514	no
AT1G01530.1	1:192633-193670	COI0	38600	NOTEST	0	0	0	0	1	1	no
AT1G01540.1	1:195644-198787	COI0	38600	OK	39.6757	48.2548	0.282418	1.01431	0.3007	0.998514	no
AT1G01550.1	1:199526-201775	COI0	38600	OK	201.899	187.074	-0.110021	-0.373719	0.70235	0.998514	no
AT1G01560.1	1:202102-204440	COI0	38600	OK	1.9415	1.31468	-0.562462	-0.823439	0.38985	0.998514	no
AT1G01570.2	1:204934-207642	COI0	38600	OK	1.61061	1.93461	0.26443	0.45667	0.63995	0.998514	no
AT1G01580.2	1:208994-213082	COI0	38600	OK	1.86052	1.59687	-0.220458	-0.401882	0.6797	0.998514	no
AT1G01590.1	1:214149-217734	COI0	38600	NOTEST	0.452605	0.221547	-1.03064	0	1	1	no
AT1G01600.1	1:218833-221286	COI0	38600	OK	9.14638	5.76992	-0.664648	-1.77778	0.0501	0.789109	no
AT1G01610.1	1:221641-224351	COI0	38600	OK	40.7916	38.3711	-0.0882544	-0.328467	0.7483	0.998514	no
AT1G01620.1	1:225664-227543	COI0	38600	OK	197.786	295.503	0.579231	1.85477	0.0599	0.838892	no
AT1G01630.1	1:228798-232630	COI0	38600	OK	22.8321	22.4945	-0.0214936	-0.0675851	0.9447	0.998514	no
AT1G01640.1	1:228798-232630	COI0	38600	OK	7.28266	8.27359	0.184047	0.276419	0.7777	0.998514	no
AT1G01650.1	1:232839-237905	COI0	38600	OK	24.0813	25.6337	0.090128	0.310666	0.7525	0.998514	no
AT1G01660.1	1:239840-246054	COI0	38600	OK	4.91537	3.78608	-0.376592	-0.828945	0.36945	0.998514	no
AT1G01680.1	1:246261-248440	COI0	38600	NOTEST	0.116043	0.138223	0.252332	0	1	1	no
AT1G01690.1	1:249040-252522	COI0	38600	OK	3.54952	4.14304	0.223065	0.497367	0.6136	0.998514	no
AT1G01695.1	1:252625-254530	COI0	38600	NOTEST	0.476223	0.723874	0.604102	0	1	1	no
AT1G01700.1	1:259306-261667	COI0	38600	OK	1.55477	1.2407	-0.325554	-0.465773	0.6241	0.998514	no
AT1G01710.1	1:262827-267883	COI0	38600	OK	33.8469	37.9425	0.164792	0.651687	0.5554	0.998514	no
AT1G01720.1	1:267992-274930	COI0	38600	OK	45.9492	58.5595	0.349863	1.04293	0.2818	0.998514	no
AT1G01725.1	1:267992-274930	COI0	38600	OK	19.7599	16.9318	-0.22284	-0.303963	0.87045	0.998514	no
AT1G01730.1	1:267992-274930	COI0	38600	OK	22.3656	14.3685	-0.63837	-1.03987	0.3838	0.998514	no
AT1G01740.1	1:267992-274930	COI0	38600	OK	6.3918	5.51257	-0.213499	-0.198929	0.8402	0.998514	no
AT1G01750.1	1:275187-278599	COI0	38600	OK	1.07565	0.210238	-2.35511	-1.29384	0.32185	0.998514	no
AT1G01760.1	1:275187-278599	COI0	38600	OK	6.93622	6.0499	-0.197238	-0.451595	0.7083	0.998514	no
AT1G01770.1	1:278599-284245	COI0	38600	OK	22.0044	20.1382	-0.127856	-0.369069	0.6995	0.998514	no
AT1G01790.1	1:284349-291203	COI0	38600	OK	32.1031	43.8274	0.449123	1.58223	0.1017	0.980785	no
AT1G01800.1	1:293245-295086	COI0	38600	OK	80.6739	85.2831	0.0801582	0.282897	0.77525	0.998514	no
AT1G01810.1	1:295206-295859	COI0	38600	OK	3.60663	3.50629	-0.040705	-0.0793983	0.96125	0.998514	no
AT1G01820.1	1:296000-298334	COI0	38600	OK	56.3524	54.4431	-0.0497297	-0.259859	0.861	0.998514	no
AT1G01830.1	1:298450-302310	COI0	38600	OK	15.7691	11.0957	-0.50709	-1.71018	0.0806	0.915647	no
AT1G01840.1	1:303462-306310	COI0	38600	OK	1.91146	1.27111	-0.588591	-0.488375	0.6561	0.998514	no
AT1G01860.1	1:303462-306310	COI0	38600	OK	15.914	18.9659	0.253114	0.697017	0.4708	0.998514	no
AT1G01870.1	1:306383-306456	COI0	38600	NOTEST	0	0	0	0	1	1	no
AT1G01880.1	1:306466-309541	COI0	38600	OK	3.09544	3.54173	0.194307	0.387771	0.69135	0.998514	no
AT1G01890.1	1:306466-309541	COI0	38600	NOTEST	0	0	0	0	1	1	no
AT1G01900.1	1:310168-319667	COI0	38600	OK	1.94431	2.80134	0.52686	0.445891	0.5725	0.998514	no
AT1G01910.1	1:310168-319667	COI0	38600	OK	35.8916	37.3173	0.056197	0.180497	0.87675	0.998514	no
AT1G01920.1	1:310168-319667	COI0	38600	OK	14.7488	12.7603	-0.208931	-0.387064	0.69295	0.998514	no
AT1G01930.1	1:319768-324917	COI0	38600	OK	13.1122	13.9257	0.086847	0.24256	0.81145	0.998514	no
AT1G01940.1	1:319768-324917	COI0	38600	OK	26.3123	27.4341	0.0602369	0.137538	0.8882	0.998514	no
AT1G01950.1	1:325315-337912	COI0	38600	OK	14.2028	16.1453	0.184938	0.364198	0.72675	0.998514	no
AT1G01960.1	1:325315-337912	COI0	38600	OK	18.7643	21.2958	0.182575	0.541994	0.5703	0.998514	no
AT1G01970.1	1:338240-340088	COI0	38600	OK	18.1268	29.8343	0.718845	2.92027	0.0199	0.533045	no
AT1G01980.1	1:340107-342040	COI0	38600	OK	0.807174	0	#NAME?	#NAME?	5e-05	0.00838689	yes
AT1G01990.1	1:342917-344400	COI0	38600	OK	23.4796	23.672	0.011773	0.0432291	0.96965	0.998514	no
AT1G02000.1	1:345515-347603	COI0	38600	OK	7.14171	8.21178	0.201425	0.459443	0.5299	0.998514	no
AT1G02010.1	1:347612-352545	COI0	38600	OK	8.81898	9.0167	0.0319871	0.0977072	0.9217	0.998514	no
AT1G02020.1	1:352611-357258	COI0	38600	OK	10.2387	10.0081	-0.0328587	-0.0992139	0.916	0.998514	no
AT1G02040.1	1:357905-360746	COI0	38600	OK	22.7213	13.6921	-0.730704	-2.35152	0.01815	0.516946	no
AT1G02060.1	1:360917-363142	COI0	38600	OK	7.362	6.64197	-0.148487	-0.511093	0.69425	0.998514	no
AT1G02065.1	1:365164-367443	COI0	38600	OK	6.87082	5.25469	-0.386875	-0.845179	0.2872	0.998514	no
AT1G02067.1	1:365164-367443	COI0	38600	OK	20.3063	7.4846	-1.43993	-0.384298	0.5483	0.998514	no
AT1G02070.1	1:370194-371090	COI0	38600	OK	1.77494	0.128229	-3.79098	-2.6075	0.119	0.998514	no
AT1G02080.1	1:373334-386913	COI0	38600	OK	30.1727	35.7864	0.246167	0.841571	0.3933	0.998514	no
AT1G02090.1	1:387276-389808	COI0	38600	OK	47.0367	39.1128	-0.266146	-0.930036	0.34145	0.998514	no
AT1G02100.1	1:389811-395528	COI0	38600	OK	56.6513	51.0413	-0.150445	-0.50336	0.6221	0.998514	no
AT1G02120.1	1:395688-401919	COI0	38600	OK	51.0628	43.4211	-0.233876	-0.708562	0.4796	0.998514	no
AT1G02130.1	1:395688-401919	COI0	38600	OK	30.105	41.4334	0.460792	0.795789	0.40885	0.998514	no
AT1G02140.1	1:403099-404456	COI0	38600	OK	197.291	226.834	0.201315	1.18544	0.4624	0.998514	no
AT1G02145.1	1:404599-410680	COI0	38600	OK	70.0403	74.0707	0.0807179	0.30347	0.7765	0.998514	no
AT1G02160.1	1:410743-414649	COI0	38600	OK	42.2974	41.2623	-0.035745	-0.128824	0.9185	0.998514	no
AT1G02180.1	1:410743-414649	COI0	38600	OK	7.98037	7.07675	-0.173368	-0.208069	0.8326	0.998514	no
AT1G02190.1	1:415073-418027	COI0	38600	OK	18.7131	9.9383	-0.912975	-3.02845	0.00235	0.158305	no
AT1G02205.1	1:418415-422579	COI0	38600	OK	85.7325	63.3167	-0.437255	-1.4781	0.1322	0.998514	no
AT1G02210.1	1:427547-427811	COI0	38600	NOTEST	0	0	0	0	1	1	no
AT1G02220.1	1:428649-430720	COI0	38600	OK	12.9126	14.0033	0.116988	0.4614	0.7375	0.998514	no
AT1G02230.1	1:434964-436922	COI0	38600	NOTEST	0.859251	0.358676	-1.2604	0	1	1	no
AT1G02250.1	1:437859-439559	COI0	38600	NOTEST	0	0	0	0	1	1	no
AT1G02260.1	1:440199-442972	COI0	38600	OK	8.09266	5.83755	-0.471253	-1.25123	0.2044	0.998514	no
AT1G02270.1	1:443117-446296	COI0	38600	OK	12.7123	13.4805	0.0846479	0.247299	0.8006	0.998514	no
AT1G02280.1	1:448422-452743	COI0	38600	OK	108.202	140.651	0.378399	1.75421	0.1695	0.998514	no
AT1G02300.1	1:453106-455519	COI0	38600	OK	16.8063	14.2543	-0.237602	-0.976031	0.49875	0.998514	no
AT1G02305.1	1:455687-463618	COI0	38600	OK	82.8607	79.5303	-0.0591822	-0.219151	0.86815	0.998514	no
AT1G02310.1	1:455687-463618	COI0	38600	OK	2.41703	1.27056	-0.927765	-0.438072	0.7056	0.998514	no
AT1G02320.1	1:455687-463618	COI0	38600	NOTEST	0.306969	0.783937	1.35264	0	1	1	no
AT1G02330.1	1:455687-463618	COI0	38600	OK	43.0031	43.4195	0.0139028	0.0300801	0.978	0.998514	no
AT1G02335.1	1:463753-464981	COI0	38600	OK	10.7916	10.5543	-0.0320746	-0.0796977	0.9327	0.998514	no
AT1G02340.1	1:465615-467880	COI0	38600	OK	17.9614	13.9979	-0.359693	-1.04156	0.28375	0.998514	no
AT1G02350.1	1:469817-470693	COI0	38600	OK	3.1633	2.27908	-0.47298	-1.00342	0.68105	0.998514	no
AT1G02360.1	1:471882-473336	COI0	38600	OK	3.17115	3.26703	0.0429749	0.0765931	0.93875	0.998514	no
AT1G02370.1	1:474372-476612	COI0	38600	OK	8.00932	8.24702	0.0421941	0.142018	0.9086	0.998514	no
AT1G02380.1	1:476944-479112	COI0	38600	OK	2.92403	5.62716	0.944451	2.09678	0.07375	0.893805	no
AT1G02390.1	1:480649-483373	COI0	38600	OK	2.44719	2.62666	0.102108	0.245891	0.84345	0.998514	no
AT1G02400.1	1:486799-489651	COI0	38600	OK	7.94742	8.00489	0.0103954	0.0253675	0.9815	0.998514	no
AT1G02405.1	1:489873-490627	COI0	38600	OK	0.907763	0.242099	-1.90672	-1.68413	0.2195	0.998514	no
AT1G02410.1	1:490859-492979	COI0	38600	OK	23.72	22.4997	-0.0761949	-0.234501	0.8083	0.998514	no
AT1G02420.1	1:493638-497555	COI0	38600	OK	1.46005	1.35208	-0.110836	-0.177518	0.91855	0.998514	no
AT1G02430.1	1:493638-497555	COI0	38600	OK	6.22554	4.7806	-0.381009	-1.02768	0.43235	0.998514	no
AT1G02450.1	1:497916-498539	COI0	38600	OK	1.04459	1.3428	0.362317	0.486845	0.75765	0.998514	no
AT1G02460.1	1:504462-507268	COI0	38600	OK	2.14449	2.44638	0.190011	0.390193	0.71265	0.998514	no
AT1G02470.1	1:511764-515422	COI0	38600	OK	99.0836	112.06	0.177557	0.642257	0.52785	0.998514	no
AT1G02480.1	1:515493-515566	COI0	38600	NOTEST	0	0	0	0	1	1	no
AT1G02490.1	1:516568-516866	COI0	38600	NOTEST	0.966584	0	#NAME?	0	1	1	no
AT1G02500.1	1:518090-520495	COI0	38600	OK	277.3	289.858	0.0638973	0.186606	0.852	0.998514	no
AT1G02510.1	1:520497-521668	COI0	38600	NOTEST	0.863384	0.209775	-2.04116	0	1	1	no
AT1G02520.1	1:523535-529069	COI0	38600	OK	2.46345	2.30524	-0.0957629	-0.242858	0.8068	0.998514	no
AT1G02530.1	1:529678-534677	COI0	38600	NOTEST	0.559644	0.221009	-1.3404	0	1	1	no
AT1G02540.1	1:534826-535699	COI0	38600	NOTEST	0.0993636	0	#NAME?	0	1	1	no
AT1G02550.1	1:536482-537211	COI0	38600	NOTEST	0	0	0	0	1	1	no
AT1G02560.1	1:537739-540127	COI0	38600	OK	162.478	193.62	0.252982	1.13769	0.38315	0.998514	no
AT1G02570.1	1:541235-542245	COI0	38600	NOTEST	0.563789	0.109423	-2.36524	0	1	1	no
AT1G02575.1	1:543010-544057	COI0	38600	NOTEST	0	0	0	0	1	1	no
AT1G02580.1	1:544732-549202	COI0	38600	NOTEST	0.290036	0.123685	-1.22956	0	1	1	no
AT1G02590.1	1:552137-552761	COI0	38600	NOTEST	0	0	0	0	1	1	no
AT1G02600.1	1:552137-552761	COI0	38600	NOTEST	0	0	0	0	1	1	no
AT1G02610.1	1:553018-556152	COI0	38600	OK	5.38317	15.8966	1.56219	3.1881	0.00405	0.219565	no
AT1G02620.1	1:557091-558774	COI0	38600	NOTEST	0.272754	0.512594	0.910215	0	1	1	no
AT1G02630.1	1:560609-562598	COI0	38600	OK	0.891353	0.574395	-0.633955	-0.674505	0.4843	0.998514	no
AT1G02640.1	1:564017-567771	COI0	38600	OK	5.23813	6.86544	0.390302	1.0302	0.24105	0.998514	no
AT1G02650.1	1:568557-570554	COI0	38600	OK	1.25531	1.41791	0.175719	0.27696	0.78285	0.998514	no
AT1G02660.1	1:571825-575085	COI0	38600	OK	4.58111	9.52585	1.05615	3.38346	0.0043	0.228284	no
AT1G02670.1	1:575921-580532	COI0	38600	OK	2.59727	2.40174	-0.112919	-0.23237	0.8111	0.998514	no
AT1G02680.1	1:580624-582310	COI0	38600	OK	21.4114	19.9708	-0.100487	-0.338675	0.76705	0.998514	no
AT1G02690.1	1:584133-587327	COI0	38600	OK	11.3182	10.6397	-0.0891927	-0.275472	0.7782	0.998514	no
AT1G02700.1	1:588002-589480	COI0	38600	OK	1.21745	0.474072	-1.36069	-1.45652	0.1278	0.998514	no
AT1G02705.1	1:589583-590406	COI0	38600	OK	3.43656	2.56458	-0.422238	-0.904658	0.7257	0.998514	no
AT1G02710.1	1:589583-590406	COI0	38600	OK	11.0827	7.56167	-0.551529	-0.416744	0.6852	0.998514	no
AT1G02720.1	1:591681-594264	COI0	38600	OK	8.84755	7.43035	-0.251847	-0.684859	0.48625	0.998514	no
AT1G02730.1	1:594501-598657	COI0	38600	OK	10.1613	10.2258	0.00913138	0.0318622	0.97465	0.998514	no
AT1G02740.1	1:599329-602199	COI0	38600	OK	11.0351	10.781	-0.0336184	-0.113003	0.9235	0.998514	no
AT1G02750.1	1:602488-604387	COI0	38600	OK	24.8766	26.2267	0.0762458	0.221404	0.8251	0.998514	no
AT1G02760.1	1:604401-604474	COI0	38600	NOTEST	0	0	0	0	1	1	no
AT1G02770.1	1:604872-606708	COI0	38600	OK	1.63954	0.781161	-1.0696	-1.56388	0.2096	0.998514	no
AT1G02780.1	1:607798-609534	COI0	38600	OK	684.599	754.117	0.139529	0.527929	0.6859	0.998514	no
AT1G02790.1	1:610362-612324	COI0	38600	OK	52.5477	0	#NAME?	#NAME?	5e-05	0.00838689	yes
AT1G02800.1	1:613196-616231	COI0	38600	OK	9.33559	7.29411	-0.356009	-0.985438	0.3051	0.998514	no
AT1G02810.1	1:618060-620502	COI0	38600	OK	2.35163	2.00966	-0.226714	-0.402366	0.63785	0.998514	no
AT1G02813.1	1:620677-621329	COI0	38600	OK	17.4566	4.35242	-2.00389	-4.82583	0.0024	0.160937	no
AT1G02816.1	1:621452-623054	COI0	38600	OK	14.099	20.8233	0.562602	2.72998	0.1108	0.998514	no
AT1G02820.1	1:623655-624567	COI0	38600	OK	11.9013	9.5315	-0.320341	-0.858889	0.46115	0.998514	no
AT1G02830.1	1:625083-625608	COI0	38600	NOTEST	0	0	0	0	1	1	no
AT1G02840.1	1:626638-629993	COI0	38600	OK	131.698	124.215	-0.0843987	-0.290738	0.76885	0.998514	no
AT1G02850.1	1:630373-633420	COI0	38600	OK	61.4352	42.6981	-0.524894	-1.87391	0.05685	0.825426	no
AT1G02860.1	1:635143-638681	COI0	38600	OK	13.9547	20.5456	0.558081	1.59118	0.3064	0.998514	no
AT1G02870.1	1:635143-638681	COI0	38600	OK	58.5395	59.793	0.0305661	0.0925887	0.92255	0.998514	no
AT1G02880.1	1:642504-644903	COI0	38600	OK	26.4504	23.694	-0.15877	-0.497754	0.6054	0.998514	no
AT1G02890.1	1:645083-652001	COI0	38600	OK	36.0691	39.2385	0.121508	0.425808	0.65795	0.998514	no
AT1G02900.1	1:653603-654457	COI0	38600	OK	19.8682	10.1679	-0.966435	-3.27364	0.02775	0.616299	no
AT1G02910.1	1:655567-658216	COI0	38600	OK	38.4555	45.1974	0.233049	0.82115	0.40135	0.998514	no
AT1G02920.1	1:658577-659980	COI0	38600	OK	256.06	220.905	-0.213052	-1.09474	0.4616	0.998514	no
AT1G02930.1	1:661087-662475	COI0	38600	OK	278.712	284.545	0.0298835	0.1018	0.91675	0.998514	no
AT1G02940.1	1:662962-664290	COI0	38600	NOTEST	0.646317	0.239279	-1.43355	0	1	1	no
AT1G02950.2	1:665118-666471	COI0	38600	OK	11.0813	10.628	-0.0602565	-0.135143	0.89255	0.998514	no
AT1G02952.1	1:665118-666471	COI0	38600	NOTEST	0	0	0	0	1	1	no
AT1G02960.1	1:666806-669919	COI0	38600	OK	15.0465	10.1402	-0.569347	-1.69411	0.0859	0.932592	no
AT1G02965.1	1:671660-672814	COI0	38600	NOTEST	0	0	0	0	1	1	no
AT1G02970.1	1:673305-676419	COI0	38600	OK	2.59249	2.56022	-0.0180703	-0.0403904	0.98105	0.998514	no
AT1G02980.1	1:677359-687385	COI0	38600	OK	0.982645	0.583063	-0.753019	-0.57652	0.61525	0.998514	no
AT1G02990.1	1:677359-687385	COI0	38600	OK	9.38159	9.937	0.0829776	0.275638	0.7786	0.998514	no
AT1G03000.1	1:687794-692660	COI0	38600	OK	11.8671	12.5855	0.0847969	0.337386	0.7732	0.998514	no
AT1G03010.1	1:693189-696504	COI0	38600	OK	3.12421	1.26255	-1.30715	-2.24953	0.0284	0.622516	no
AT1G03020.1	1:697918-698591	COI0	38600	OK	3.7777	0.428025	-3.14174	-4.74275	0.11855	0.998514	no
AT1G03030.1	1:701364-706689	COI0	38600	OK	18.5318	20.2587	0.12854	0.289724	0.79785	0.998514	no
AT1G03040.1	1:701364-706689	COI0	38600	OK	44.1592	42.813	-0.0446651	-0.132903	0.89205	0.998514	no
AT1G03050.1	1:707484-711857	COI0	38600	OK	1.58605	0.0337988	-5.55232	-1.587	0.21965	0.998514	no
AT1G03055.1	1:707484-711857	COI0	38600	OK	10.3382	16.1995	0.647971	1.55039	0.118	0.998514	no
AT1G03060.1	1:712439-727553	COI0	38600	OK	7.68043	8.53002	0.151363	0.535479	0.58675	0.998514	no
AT1G03070.1	1:729829-738306	COI0	38600	OK	2.00643	3.03008	0.594722	0.293725	0.8478	0.998514	no
AT1G03080.1	1:729829-738306	COI0	38600	OK	31.2732	32.461	0.0537797	0.185154	0.85035	0.998514	no
AT1G03090.1	1:739543-746701	COI0	38600	OK	8.15723	11.2445	0.463072	1.4075	0.14965	0.998514	no
AT1G03100.1	1:739543-746701	COI0	38600	OK	0.719703	1.02722	0.513271	0.523096	0.6789	0.998514	no
AT1G03103.1	1:747196-748057	COI0	38600	NOTEST	0	0	0	0	1	1	no
AT1G03106.1	1:748100-749034	COI0	38600	NOTEST	0.659578	0.354054	-0.897573	0	1	1	no
AT1G03110.1	1:749245-751976	COI0	38600	OK	14.6941	12.0915	-0.281241	-0.939829	0.409	0.998514	no
AT1G03120.1	1:752190-753140	COI0	38600	OK	1.00051	0.755819	-0.404624	-0.326031	0.7459	0.998514	no
AT1G03130.1	1:753306-756303	COI0	38600	OK	700.541	958.501	0.452309	1.2911	0.22055	0.998514	no
AT1G03150.1	1:756413-758678	COI0	38600	OK	33.9371	41.8397	0.302012	1.23849	0.33395	0.998514	no
AT1G03160.1	1:761260-766194	COI0	38600	OK	26.6361	31.61	0.246998	0.879292	0.36825	0.998514	no
AT1G03165.1	1:766335-767385	COI0	38600	OK	3.00672	12.1581	2.01565	1.08524	0.143	0.998514	no
AT1G03170.1	1:768375-770684	COI0	38600	OK	5.46788	3.08354	-0.826393	-2.43868	0.0669	0.866814	no
AT1G03180.1	1:773357-775362	COI0	38600	OK	3.44385	5.70415	0.727993	1.28734	0.1786	0.998514	no
AT1G03190.1	1:775526-780062	COI0	38600	OK	9.11574	9.26617	0.0236133	0.0731461	0.9369	0.998514	no
AT1G03200.1	1:780518-784346	COI0	38600	OK	64.2912	72.1632	0.166641	0.898364	0.6242	0.998514	no
AT1G03220.1	1:786831-788722	COI0	38600	OK	46.8138	52.8854	0.175936	0.606837	0.5228	0.998514	no
AT1G03230.1	1:789819-791689	COI0	38600	OK	10.6672	7.30569	-0.546088	-1.48155	0.1096	0.998269	no
AT1G03240.1	1:792221-793060	COI0	38600	NOTEST	0.218507	0.275126	0.332407	0	1	1	no
AT1G03250.1	1:793314-798491	COI0	38600	OK	34.3031	31.2203	-0.135854	-0.504943	0.6521	0.998514	no
AT1G03270.1	1:799114-802625	COI0	38600	OK	4.42286	4.0197	-0.137894	-0.352472	0.7661	0.998514	no
AT1G03280.1	1:802969-807066	COI0	38600	OK	28.9273	28.2361	-0.0348939	-0.12267	0.8956	0.998514	no
AT1G03290.1	1:807360-813216	COI0	38600	OK	20.403	21.0951	0.0481278	0.207347	0.8807	0.998514	no
AT1G03300.1	1:807360-813216	COI0	38600	OK	4.75061	5.10294	0.103216	0.158033	0.8716	0.998514	no
AT1G03310.1	1:813412-816812	COI0	38600	OK	26.1196	29.6125	0.181075	0.646727	0.5156	0.998514	no
AT1G03320.1	1:816988-817767	COI0	38600	NOTEST	0.207832	0.137918	-0.591615	0	1	1	no
AT1G03325.1	1:816988-817767	COI0	38600	NOTEST	0	0	0	0	1	1	no
AT1G03330.1	1:817933-819563	COI0	38600	OK	53.9622	50.3407	-0.100223	-0.521849	0.7482	0.998514	no
AT1G03340.1	1:819611-821476	COI0	38600	OK	3.17359	3.10029	-0.0337118	-0.0822125	0.94985	0.998514	no
AT1G03350.1	1:822581-824410	COI0	38600	OK	31.4879	30.412	-0.0501577	-0.219819	0.86045	0.998514	no
AT1G03360.1	1:824516-826399	COI0	38600	OK	27.2268	25.6356	-0.0868758	-0.368476	0.77865	0.998514	no
AT1G03365.1	1:826522-830393	COI0	38600	OK	13.1205	14.3896	0.133198	0.442579	0.65645	0.998514	no
AT1G03370.1	1:830549-835411	COI0	38600	OK	8.89555	8.45215	-0.0737651	-0.240634	0.80455	0.998514	no
AT1G03380.1	1:835766-842418	COI0	38600	OK	15.8735	17.1728	0.113504	0.451468	0.68935	0.998514	no
AT1G03390.1	1:835766-842418	COI0	38600	OK	0.794039	1.2638	0.670489	0.285809	0.7949	0.998514	no
AT1G03395.1	1:835766-842418	COI0	38600	NOTEST	0	0	0	0	1	1	no
AT1G03400.1	1:842658-844251	COI0	38600	OK	16.5652	16.7547	0.0164164	0.0515518	0.95945	0.998514	no
AT1G03410.1	1:844435-847683	COI0	38600	OK	4.04069	3.38249	-0.256518	-0.343028	0.71155	0.998514	no
AT1G03430.1	1:847792-849621	COI0	38600	OK	12.8059	10.3421	-0.308277	-0.742369	0.4548	0.998514	no
AT1G03440.1	1:852150-854297	COI0	38600	OK	13.7572	27.0357	0.974671	3.13476	0.00075	0.0729868	no
AT1G03445.1	1:854409-859701	COI0	38600	NOTEST	0.0797053	0.0638049	-0.321008	0	1	1	no
AT1G03457.1	1:860760-864372	COI0	38600	OK	6.05197	5.58737	-0.115236	-0.286634	0.7656	0.998514	no
AT1G03470.1	1:865894-867733	COI0	38600	OK	13.9094	13.395	-0.0543631	-0.146233	0.88435	0.998514	no
AT1G03475.1	1:868852-871308	COI0	38600	OK	69.3842	79.5721	0.197657	0.816918	0.473	0.998514	no
AT1G03490.1	1:871873-872906	COI0	38600	NOTEST	0.090392	0	#NAME?	0	1	1	no
AT1G03495.1	1:873165-874476	COI0	38600	OK	15.5219	19.7628	0.348483	1.10799	0.27775	0.998514	no
AT1G03502.1	1:875357-875471	COI0	38600	NOTEST	0	0	0	0	1	1	no
AT1G03506.1	1:875517-875604	COI0	38600	NOTEST	0	0	0	0	1	1	no
AT1G03510.1	1:876086-877556	COI0	38600	OK	1.36269	1.58492	0.217961	0.405702	0.7722	0.998514	no
AT1G03515.1	1:877647-877719	COI0	38600	NOTEST	0	0	0	0	1	1	no
AT1G03520.1	1:877860-880259	COI0	38600	OK	9.71916	12.252	0.334114	0.932065	0.33985	0.998514	no
AT1G03530.1	1:880383-883599	COI0	38600	OK	10.2601	9.74357	-0.0745271	-0.20336	0.80155	0.998514	no
AT1G03540.1	1:883682-885611	COI0	38600	OK	1.93853	3.01103	0.635298	1.42497	0.24925	0.998514	no
AT1G03545.1	1:885622-887972	COI0	38600	OK	1.94836	2.09332	0.103529	0.148179	0.90375	0.998514	no
AT1G03550.1	1:885622-887972	COI0	38600	OK	23.5996	24.3151	0.0430879	0.113904	0.9078	0.998514	no
AT1G03560.1	1:890154-892492	COI0	38600	OK	10.5018	8.67221	-0.276171	-1.12087	0.432	0.998514	no
AT1G03570.1	1:892513-892585	COI0	38600	NOTEST	0	0	0	0	1	1	no
AT1G03590.1	1:894237-897718	COI0	38600	OK	22.8532	21.6943	-0.0750817	-0.285192	0.7892	0.998514	no
AT1G03600.1	1:898479-899794	COI0	38600	OK	169.652	192.781	0.184384	0.750259	0.52405	0.998514	no
AT1G03610.1	1:900731-903070	COI0	38600	OK	22.3474	36.0651	0.690496	2.3605	0.01395	0.44783	no
AT1G03620.1	1:904031-909650	COI0	38600	OK	5.25155	4.34772	-0.272484	-0.165381	0.8867	0.998514	no
AT1G03630.1	1:904031-909650	COI0	38600	OK	114.679	210.615	0.876999	2.85774	0.004	0.219565	no
AT1G03640.1	1:909810-909883	COI0	38600	NOTEST	0	0	0	0	1	1	no
AT1G03650.1	1:910022-913808	COI0	38600	OK	2.96273	4.35734	0.55652	0.991451	0.4009	0.998514	no
AT1G03670.1	1:914221-916222	COI0	38600	NOTEST	0	0	0	0	1	1	no
AT1G03680.1	1:916771-918064	COI0	38600	OK	132.974	175.866	0.403333	1.7625	0.1496	0.998514	no
AT1G03687.1	1:918284-920592	COI0	38600	OK	10.3158	11.6369	0.173858	0.494612	0.614	0.998514	no
AT1G03700.1	1:920949-922098	COI0	38600	NOTEST	0.418702	0.313886	-0.415681	0	1	1	no
AT1G03710.1	1:923389-924730	COI0	38600	OK	4.39146	2.99125	-0.553953	-0.883017	0.37435	0.998514	no
AT1G03720.1	1:924895-926373	COI0	38600	NOTEST	0	0	0	0	1	1	no
AT1G03730.1	1:930714-931985	COI0	38600	OK	10.4751	5.72747	-0.871	-3.14696	0.07385	0.894281	no
AT1G03740.1	1:933425-937152	COI0	38600	OK	13.4947	10.6953	-0.335413	-1.10991	0.25755	0.998514	no
AT1G03743.1	1:937206-937287	COI0	38600	NOTEST	0	0	0	0	1	1	no
AT1G03746.1	1:937400-937485	COI0	38600	NOTEST	0	0	0	0	1	1	no
AT1G03750.1	1:937825-943377	COI0	38600	OK	3.95307	3.52526	-0.165242	-0.361334	0.7468	0.998514	no
AT1G03760.1	1:937825-943377	COI0	38600	OK	10.1919	12.3752	0.280028	0.684771	0.4744	0.998514	no
AT1G03770.1	1:944571-951850	COI0	38600	OK	5.69364	8.96642	0.655181	1.38914	0.1492	0.998514	no
AT1G03780.1	1:944571-951850	COI0	38600	OK	6.07457	5.72256	-0.0861214	-0.206621	0.8302	0.998514	no
AT1G03790.1	1:954289-956144	COI0	38600	OK	1.26228	1.51619	0.26442	0.503662	0.7025	0.998514	no
AT1G03800.1	1:957103-958383	COI0	38600	NOTEST	0.415383	0.311418	-0.415591	0	1	1	no
AT1G03810.1	1:958758-959609	COI0	38600	NOTEST	0.312437	0	#NAME?	0	1	1	no
AT1G03820.1	1:959789-960916	COI0	38600	OK	12.0017	17.8365	0.571592	1.75276	0.1162	0.998514	no
AT1G03830.1	1:961683-966790	COI0	38600	OK	4.23134	5.03077	0.249665	0.716795	0.4627	0.998514	no
AT1G03840.1	1:967469-970334	COI0	38600	NOTEST	0.402734	0.517964	0.363024	0	1	1	no
AT1G03850.1	1:975870-977911	COI0	38600	OK	8.37568	5.66699	-0.563624	-1.01201	0.3038	0.998514	no
AT1G03860.1	1:979306-982002	COI0	38600	OK	68.9296	77.3943	0.167104	0.597185	0.53895	0.998514	no
AT1G03870.1	1:982380-983544	COI0	38600	OK	65.3157	47.8616	-0.448562	-1.66572	0.1113	0.998514	no
AT1G03880.1	1:985750-988146	COI0	38600	NOTEST	0	0	0	0	1	1	no
AT1G03890.1	1:989197-991020	COI0	38600	NOTEST	0.0353518	0	#NAME?	0	1	1	no
AT1G03900.1	1:991105-993126	COI0	38600	OK	82.8998	68.4882	-0.275513	-0.846547	0.32255	0.998514	no
AT1G03905.1	1:993399-995989	COI0	38600	OK	3.49174	2.68965	-0.376526	-0.676781	0.49095	0.998514	no
AT1G03910.1	1:996075-1000629	COI0	38600	OK	34.8891	36.2628	0.0557165	0.19829	0.8383	0.998514	no
AT1G03920.1	1:1001115-1004410	COI0	38600	OK	2.06738	1.94082	-0.0911355	-0.166949	0.86215	0.998514	no
AT1G03930.1	1:1004687-1008370	COI0	38600	OK	23.4536	19.6682	-0.253942	-1.00578	0.37495	0.998514	no
AT1G03935.1	1:1008809-1008896	COI0	38600	NOTEST	0	0	0	0	1	1	no
AT1G03940.1	1:1009227-1013365	COI0	38600	OK	21.1535	23.724	0.165449	0.49773	0.59935	0.998514	no
AT1G03960.1	1:1013642-1017957	COI0	38600	OK	7.7689	6.70487	-0.212502	-0.576006	0.5584	0.998514	no
AT1G03970.1	1:1018057-1019247	COI0	38600	OK	15.511	13.0116	-0.253492	-0.737899	0.48665	0.998514	no
AT1G03980.1	1:1019310-1022108	COI0	38600	NOTEST	0.284797	0.402483	0.498993	0	1	1	no
AT1G03982.1	1:1022250-1023719	COI0	38600	NOTEST	0.0938723	0.10638	0.180458	0	1	1	no
AT1G03987.1	1:11100-11372	COI0	38600	NOTEST	0	0	0	0	1	1	no
AT1G03990.1	1:1024739-1027616	COI0	38600	OK	1.1331	1.34925	0.251879	0.390429	0.66335	0.998514	no
AT1G03993.1	1:23120-33171	COI0	38600	OK	13.7585	17.6362	0.358209	0.428136	0.80465	0.998514	no
AT1G03997.1	1:23120-33171	COI0	38600	NOTEST	0	0	0	0	1	1	no
AT1G04000.1	1:1027852-1029119	COI0	38600	OK	14.0963	11.6607	-0.273664	-0.811203	0.4396	0.998514	no
AT1G04003.1	1:43086-43295	COI0	38600	NOTEST	0	0	0	0	1	1	no
AT1G04007.1	1:72338-74737	COI0	38600	OK	4.5341	5.91926	0.3846	0.337672	0.88205	0.998514	no
AT1G04010.1	1:1030956-1036264	COI0	38600	OK	7.01078	7.85822	0.164626	0.548059	0.6331	0.998514	no
AT1G04013.1	1:72338-74737	COI0	38600	OK	2.28816	4.23927	0.889627	0.0924186	0.27315	0.998514	no
AT1G04017.1	1:88621-90502	COI0	38600	OK	9.25823	17.7747	0.941017	0.311462	0.7422	0.998514	no
AT1G04020.1	1:1036492-1040262	COI0	38600	OK	6.04429	6.27877	0.0549096	0.147752	0.87805	0.998514	no
AT1G04023.1	1:91341-95681	COI0	38600	NOTEST	0.7068	0	#NAME?	0	1	1	no
at1g04027	1:232839-237905	COI0	38600	NOTEST	0	0	0	0	1	1	no
AT1G04030.1	1:1040374-1043887	COI0	38600	OK	4.08529	3.0896	-0.403017	-0.56243	0.5983	0.998514	no
AT1G04033.1	1:255021-255384	COI0	38600	NOTEST	0	0	0	0	1	1	no
AT1G04037.1	1:258716-258963	COI0	38600	NOTEST	0	0	0	0	1	1	no
AT1G04040.1	1:1040374-1043887	COI0	38600	OK	41.7426	19.9953	-1.06186	-3.27962	0.00095	0.0872577	no
AT1G04043.1	1:267992-274930	COI0	38600	NOTEST	0	0	0	0	1	1	no
AT1G04047.1	1:267992-274930	COI0	38600	NOTEST	0	0	0	0	1	1	no
AT1G04050.1	1:1045597-1049864	COI0	38600	OK	3.68692	2.94455	-0.324371	-0.769079	0.4339	0.998514	no
AT1G04057.1	1:275187-278599	COI0	38600	NOTEST	0	0	0	0	1	1	no
AT1G04063.1	1:291593-292061	COI0	38600	NOTEST	0	0	0	0	1	1	no
AT1G04067.1	1:303462-306310	COI0	38600	NOTEST	0	0	0	0	1	1	no
AT1G04070.1	1:1050504-1051194	COI0	38600	OK	20.7375	17.8195	-0.21878	-0.806743	0.59895	0.998514	no
AT1G04073.1	1:303462-306310	COI0	38600	NOTEST	0	0	0	0	1	1	no
AT1G04077.1	1:310168-319667	COI0	38600	OK	3.3683	4.59497	0.448036	0.335403	0.7092	0.998514	no
AT1G04080.1	1:1051311-1056827	COI0	38600	OK	49.2994	51.5073	0.0632058	0.222799	0.82265	0.998514	no
AT1G04083.1	1:310168-319667	COI0	38600	NOTEST	0	0	0	0	1	1	no
AT1G04087.1	1:402085-402294	COI0	38600	NOTEST	0	0	0	0	1	1	no
AT1G04090.1	1:1057040-1061209	COI0	38600	OK	2.1697	1.77754	-0.287612	-0.55145	0.68065	0.998514	no
AT1G04093.1	1:424665-425164	COI0	38600	NOTEST	0	0	0	0	1	1	no
AT1G04097.1	1:455687-463618	COI0	38600	NOTEST	0	0	0	0	1	1	no
AT1G04103.1	1:455687-463618	COI0	38600	NOTEST	0	0	0	0	1	1	no
AT1G04105.1	1:1057040-1061209	COI0	38600	OK	4.00798	3.6151	-0.148839	-0.112487	0.91525	0.998514	no
AT1G04110.1	1:1061296-1063809	COI0	38600	OK	1.70203	2.30321	0.436391	0.839994	0.37425	0.998514	no
AT1G04120.1	1:1064263-1071080	COI0	38600	OK	36.9281	36.7143	-0.0083774	-0.0293902	0.9757	0.998514	no
AT1G04123.1	1:493638-497555	COI0	38600	NOTEST	0	1.85996	inf	0	1	1	no
AT1G04127.1	1:551288-551529	COI0	38600	NOTEST	0	4.81467	inf	0	1	1	no
AT1G04130.1	1:1073273-1080630	COI0	38600	OK	20.5121	19.7004	-0.0582474	-0.0959976	0.9346	0.998514	no
AT1G04133.1	1:557091-558774	COI0	38600	OK	0	0.990508	inf	#NAME?	0.18705	0.998514	no
AT1G04137.1	1:559734-560251	COI0	38600	NOTEST	0	0	0	0	1	1	no
AT1G04140.1	1:1073273-1080630	COI0	38600	OK	39.8253	43.8941	0.140345	0.446864	0.6511	0.998514	no
AT1G04143.1	1:583470-583860	COI0	38600	NOTEST	0	0	0	0	1	1	no
AT1G04147.1	1:635143-638681	COI0	38600	NOTEST	0	0	0	0	1	1	no
AT1G04150.1	1:1081023-1084431	COI0	38600	NOTEST	0.526571	0.301983	-0.802163	0	1	1	no
AT1G04153.1	1:635143-638681	COI0	38600	NOTEST	0	0	0	0	1	1	no
AT1G04157.1	1:739543-746701	COI0	38600	NOTEST	0	0	0	0	1	1	no
AT1G04160.1	1:1086169-1096510	COI0	38600	OK	3.11868	2.97171	-0.0696449	-0.194152	0.8455	0.998514	no
AT1G04163.1	1:739543-746701	COI0	38600	OK	1.76045	1.9189	0.124338	0.104393	0.9182	0.998514	no
AT1G04167.1	1:760883-761099	COI0	38600	NOTEST	0	0	0	0	1	1	no
AT1G04170.1	1:1096881-1099901	COI0	38600	OK	80.0607	80.7453	0.0122836	0.0434169	0.9639	0.998514	no
AT1G04173.1	1:766335-767385	COI0	38600	NOTEST	0	0	0	0	1	1	no
AT1G04177.1	1:780106-780409	COI0	38600	NOTEST	0	0	0	0	1	1	no
AT1G04180.1	1:1104492-1106241	COI0	38600	NOTEST	0.26554	0.181512	-0.548866	0	1	1	no
AT1G04183.1	1:844435-847683	COI0	38600	OK	17.4803	16.9394	-0.0453425	-0.134332	0.88715	0.998514	no
AT1G04187.1	1:875055-875189	COI0	38600	NOTEST	0	0	0	0	1	1	no
AT1G04190.1	1:1106353-1108725	COI0	38600	OK	28.3743	31.6187	0.156195	0.623828	0.59675	0.998514	no
AT1G04193.1	1:875223-875340	COI0	38600	NOTEST	0	0	0	0	1	1	no
AT1G04197.1	1:875678-875823	COI0	38600	NOTEST	0	0	0	0	1	1	no
AT1G04200.1	1:1109394-1114155	COI0	38600	OK	15.4829	14.0814	-0.136885	-0.443936	0.65085	0.998514	no
AT1G04203.1	1:910022-913808	COI0	38600	NOTEST	0	0	0	0	1	1	no
AT1G04207.1	1:926988-927200	COI0	38600	NOTEST	0	0	0	0	1	1	no
AT1G04210.1	1:1114374-1122786	COI0	38600	OK	26.9856	32.41	0.264251	0.971517	0.41545	0.998514	no
AT1G04213.1	1:933425-937152	COI0	38600	NOTEST	0	0	0	0	1	1	no
AT1G04217.1	1:1008591-1008735	COI0	38600	NOTEST	0	212.002	inf	0	1	1	no
AT1G04220.1	1:1114374-1122786	COI0	38600	OK	5.91561	5.65979	-0.0637781	-0.0757011	0.9508	0.998514	no
AT1G04223.1	1:1009072-1009189	COI0	38600	NOTEST	0	0	0	0	1	1	no
AT1G04227.1	1:1009227-1013365	COI0	38600	NOTEST	0	0	0	0	1	1	no
AT1G04230.1	1:1125514-1129689	COI0	38600	OK	10.935	11.5936	0.0843682	0.188036	0.87715	0.998514	no
AT1G04233.1	1:1018057-1019247	COI0	38600	OK	23.1813	28.5961	0.302857	0.414824	0.67305	0.998514	no
AT1G04237.1	1:1040374-1043887	COI0	38600	OK	0	1.37433	inf	#NAME?	0.2135	0.998514	no
AT1G04240.2	1:1125514-1129689	COI0	38600	OK	50.1314	60.5932	0.273442	0.833371	0.39075	0.998514	no
AT1G04243.1	1:1072573-1072780	COI0	38600	NOTEST	0	0	0	0	1	1	no
AT1G04247.1	1:1114374-1122786	COI0	38600	OK	17.3108	14.5162	-0.254005	-0.38352	0.6965	0.998514	no
AT1G04250.1	1:1136077-1138663	COI0	38600	OK	28.1272	31.3468	0.156355	0.600568	0.60235	0.998514	no
AT1G04253.1	1:1134307-1134997	COI0	38600	NOTEST	0	0	0	0	1	1	no
AT1G04257.1	1:1178924-1179176	COI0	38600	NOTEST	0	0	0	0	1	1	no
AT1G04260.1	1:1140277-1143130	COI0	38600	OK	449.162	497.147	0.146436	0.469666	0.6236	0.998514	no
AT1G04263.1	1:1215730-1215831	COI0	38600	NOTEST	0	0	0	0	1	1	no
AT1G04267.1	1:1215924-1217471	COI0	38600	NOTEST	0	0	0	0	1	1	no
AT1G04273.1	1:1215924-1217471	COI0	38600	NOTEST	0	0	0	0	1	1	no
AT1G04277.1	1:1215924-1217471	COI0	38600	NOTEST	0	0	0	0	1	1	no
AT1G04280.1	1:1143435-1147091	COI0	38600	OK	11.5057	11.2902	-0.0272826	-0.0849128	0.93035	0.998514	no
AT1G04283.1	1:1299552-1299796	COI0	38600	NOTEST	0	0	0	0	1	1	no
AT1G04287.1	1:1333695-1334012	COI0	38600	NOTEST	0	0	0	0	1	1	no
AT1G04290.1	1:1147296-1154667	COI0	38600	OK	32.9766	37.4762	0.184531	0.642205	0.5183	0.998514	no
AT1G04295.1	1:1147296-1154667	COI0	38600	OK	6.59374	2.26668	-1.54051	-0.861908	0.64935	0.998514	no
AT1G04297.1	1:1383840-1391381	COI0	38600	NOTEST	0.629271	0.24588	-1.35573	0	1	1	no
AT1G04303.1	1:1383840-1391381	COI0	38600	NOTEST	0	0	0	0	1	1	no
AT1G04307.1	1:1429047-1430056	COI0	38600	OK	0.343351	0.86316	1.32994	0.716054	0.22405	0.998514	no
AT1G04310.1	1:1154739-1157813	COI0	38600	OK	16.9411	15.381	-0.139377	-0.482934	0.6049	0.998514	no
AT1G04313.1	1:1444691-1446116	COI0	38600	OK	0	0.830758	inf	#NAME?	0.0609	0.8401	no
AT1G04320.1	1:1159022-1159093	COI0	38600	NOTEST	0	0	0	0	1	1	no
AT1G04323.1	1:1446834-1447073	COI0	38600	NOTEST	0	0	0	0	1	1	no
AT1G04327.1	1:1461933-1462340	COI0	38600	NOTEST	0	0	0	0	1	1	no
AT1G04330.1	1:1161288-1161982	COI0	38600	OK	4.81069	5.65134	0.232347	0.462079	0.6946	0.998514	no
AT1G04333.1	1:1461933-1462340	COI0	38600	NOTEST	0	0	0	0	1	1	no
AT1G04337.1	1:1496734-1497102	COI0	38600	NOTEST	0	0	0	0	1	1	no
AT1G04340.1	1:1162904-1164861	COI0	38600	OK	27.3956	26.8386	-0.0296316	-0.124311	0.92565	0.998514	no
AT1G04343.1	1:1504940-1510341	COI0	38600	OK	44.7791	35.8369	-0.321376	-1.04761	0.77275	0.998514	no
AT1G04347.1	1:1504940-1510341	COI0	38600	NOTEST	0	0.600094	inf	0	1	1	no
AT1G04350.1	1:1164909-1167135	COI0	38600	OK	69.1284	73.0368	0.0793442	0.424722	0.76835	0.998514	no
AT1G04357.1	1:1523560-1524069	COI0	38600	OK	0.973356	3.95431	2.02239	1.75341	0.1028	0.98302	no
AT1G04360.1	1:1167287-1169034	COI0	38600	OK	2.24815	1.50573	-0.578279	-1.02134	0.3306	0.998514	no
AT1G04363.1	1:1523560-1524069	COI0	38600	NOTEST	0	0	0	0	1	1	no
AT1G04367.1	1:1524571-1525242	COI0	38600	NOTEST	0	0	0	0	1	1	no
AT1G04370.1	1:1175032-1175768	COI0	38600	NOTEST	0.106437	0.266812	1.32583	0	1	1	no
AT1G04373.1	1:1538272-1538484	COI0	38600	NOTEST	0	0	0	0	1	1	no
AT1G04377.1	1:1542968-1543394	COI0	38600	NOTEST	0	0	0	0	1	1	no
AT1G04380.1	1:1176543-1178488	COI0	38600	NOTEST	0.297677	0.113607	-1.3897	0	1	1	no
AT1G04383.1	1:1542968-1543394	COI0	38600	NOTEST	0	0	0	0	1	1	no
AT1G04387.1	1:1543642-1544093	COI0	38600	NOTEST	0	0	0	0	1	1	no
AT1G04390.1	1:1179309-1183704	COI0	38600	OK	6.77623	7.00965	0.0488593	0.196176	0.8851	0.998514	no
at1g04393	1:1647574-1659611	COI0	38600	NOTEST	0	0	0	0	1	1	no
AT1G04397.1	1:1661407-1662259	COI0	38600	NOTEST	0	0	0	0	1	1	no
AT1G04400.1	1:1185511-1188696	COI0	38600	OK	67.3424	84.9787	0.335586	1.15288	0.24675	0.998514	no
AT1G04403.1	1:1693475-1693804	COI0	38600	NOTEST	0	0	0	0	1	1	no
AT1G04407.1	1:1713478-1713740	COI0	38600	NOTEST	0	0	0	0	1	1	no
AT1G04410.1	1:1188994-1191458	COI0	38600	OK	307.904	302.806	-0.0240868	-0.101333	0.93555	0.998514	no
AT1G04413.1	1:1717388-1721309	COI0	38600	NOTEST	0	0	0	0	1	1	no
AT1G04417.1	1:1717388-1721309	COI0	38600	NOTEST	0	0	0	0	1	1	no
AT1G04420.1	1:1191518-1193884	COI0	38600	OK	55.7435	90.8766	0.705105	2.83041	0.01375	0.44383	no
at1g04423	1:1726557-1728520	COI0	38600	NOTEST	0	0	0	0	1	1	no
AT1G04425.1	1:1194186-1196889	COI0	38600	OK	3.4803	1.45067	-1.26249	-2.35863	0.29555	0.998514	no
AT1G04427.1	1:1728657-1729890	COI0	38600	OK	8.37489	18.6247	1.15307	1.17463	0.2467	0.998514	no
AT1G04430.1	1:1197955-1201579	COI0	38600	OK	49.8728	48.9649	-0.0265065	-0.0935794	0.92415	0.998514	no
AT1G04433.1	1:1762144-1766283	COI0	38600	OK	50.2252	32.2031	-0.64121	-2.41504	0.52835	0.998514	no
AT1G04437.1	1:1762144-1766283	COI0	38600	NOTEST	0	0	0	0	1	1	no
AT1G04440.1	1:1202159-1206009	COI0	38600	OK	36.4342	38.3551	0.0741241	0.365576	0.78835	0.998514	no
AT1G04443.1	1:1839482-1839729	COI0	38600	NOTEST	0	0	0	0	1	1	no
AT1G04445.1	1:1206759-1207939	COI0	38600	NOTEST	0	0.404017	inf	0	1	1	no
AT1G04447.1	1:1887403-1887728	COI0	38600	NOTEST	0	0	0	0	1	1	no
AT1G04450.1	1:1208520-1210026	COI0	38600	NOTEST	0.410878	0	#NAME?	0	1	1	no
AT1G04453.1	1:1953733-1954192	COI0	38600	NOTEST	0	0	0	0	1	1	no
AT1G04455.1	1:1210268-1210622	COI0	38600	NOTEST	0	0	0	0	1	1	no
AT1G04463.1	1:1965839-1969656	COI0	38600	OK	5.26957	4.71836	-0.1594	-0.207878	0.88215	0.998514	no
AT1G04467.1	1:1965839-1969656	COI0	38600	NOTEST	0.326096	0	#NAME?	0	1	1	no
AT1G04470.1	1:1210923-1214841	COI0	38600	NOTEST	0.270706	0	#NAME?	0	1	1	no
AT1G04473.1	1:1989478-1992228	COI0	38600	OK	0.283208	2.1921	2.95238	1.15218	0.393	0.998514	no
AT1G04477.1	1:1989478-1992228	COI0	38600	OK	1.34212	1.22077	-0.136722	-0.0326801	0.68975	0.998514	no
AT1G04480.1	1:1215924-1217471	COI0	38600	OK	201.311	212.575	0.0785464	0.279075	0.7705	0.998514	no
AT1G04483.1	1:2007614-2013545	COI0	38600	NOTEST	0	0	0	0	1	1	no
AT1G04487.1	1:2031625-2052170	COI0	38600	NOTEST	0	0	0	0	1	1	no
AT1G04490.1	1:1217689-1220899	COI0	38600	OK	0.618579	0.825978	0.417146	0.421003	0.57385	0.998514	no
AT1G04493.1	1:2055744-2067483	COI0	38600	NOTEST	0	0	0	0	1	1	no
AT1G04497.1	1:2055744-2067483	COI0	38600	NOTEST	0	0	0	0	1	1	no
AT1G04500.1	1:1221410-1224539	COI0	38600	OK	1.63753	0.606592	-1.43272	-1.80247	0.06785	0.870313	no
AT1G04507.1	1:2083310-2091686	COI0	38600	NOTEST	0	0	0	0	1	1	no
AT1G04510.1	1:1226482-1230947	COI0	38600	OK	36.172	46.0399	0.348014	1.22865	0.20955	0.998514	no
AT1G04517.1	1:2107312-2107396	COI0	38600	NOTEST	0	0	0	0	1	1	no
AT1G04520.1	1:1231451-1234032	COI0	38600	OK	20.9432	22.3996	0.0969885	0.347581	0.7465	0.998514	no
AT1G04523.1	1:2107814-2108063	COI0	38600	NOTEST	0	0	0	0	1	1	no
AT1G04527.1	1:2111063-2111147	COI0	38600	NOTEST	0	0	0	0	1	1	no
AT1G04530.1	1:1234175-1236206	COI0	38600	OK	100.112	107.071	0.0969628	0.445803	0.7285	0.998514	no
AT1G04540.1	1:1236753-1239199	COI0	38600	OK	3.66754	1.70394	-1.10594	-2.39201	0.02555	0.595048	no
AT1G04547.1	1:2156220-2156306	COI0	38600	NOTEST	0	0	0	0	1	1	no
AT1G04550.1	1:1240293-1242157	COI0	38600	OK	45.0656	39.7886	-0.17967	-0.617555	0.52085	0.998514	no
AT1G04555.1	1:1242505-1244244	COI0	38600	OK	6.99868	5.25949	-0.41216	-1.02255	0.41265	0.998514	no
AT1G04557.1	1:2166347-2168397	COI0	38600	NOTEST	4.92051	0	#NAME?	0	1	1	no
AT1G04560.1	1:1244946-1246059	COI0	38600	NOTEST	0	0	0	0	1	1	no
AT1G04563.1	1:2184317-2188734	COI0	38600	NOTEST	2.722	0	#NAME?	0	1	1	no
AT1G04567.1	1:2215215-2219649	COI0	38600	NOTEST	0	0.534942	inf	0	1	1	no
AT1G04570.1	1:1246600-1248876	COI0	38600	OK	1.27188	0.38104	-1.73895	-2.01641	0.0668	0.866281	no
AT1G04573.1	1:2241510-2241744	COI0	38600	NOTEST	0	0	0	0	1	1	no
AT1G04577.1	1:2291368-2294558	COI0	38600	NOTEST	0	0	0	0	1	1	no
AT1G04580.1	1:1252004-1257893	COI0	38600	OK	1.95799	0.311658	-2.65133	-4.60284	0.00155	0.121515	no
AT1G04583.1	1:2294565-2295489	COI0	38600	NOTEST	0.32506	0.209309	-0.635073	0	1	1	no
AT1G04587.1	1:2295552-2299544	COI0	38600	OK	0	7.9439	inf	#NAME?	0.2153	0.998514	no
AT1G04590.1	1:1258555-1261470	COI0	38600	OK	31.4339	36.1809	0.202904	0.692194	0.4838	0.998514	no
AT1G04593.1	1:2318142-2321961	COI0	38600	NOTEST	0	0	0	0	1	1	no
AT1G04597.1	1:2334332-2334599	COI0	38600	NOTEST	0	0	0	0	1	1	no
AT1G04600.1	1:1261761-1272588	COI0	38600	NOTEST	0.370507	0.176106	-1.07306	0	1	1	no
AT1G04603.1	1:2340558-2341109	COI0	38600	NOTEST	0	0	0	0	1	1	no
AT1G04607.1	1:2348026-2348447	COI0	38600	NOTEST	0	0	0	0	1	1	no
AT1G04610.1	1:1279350-1281618	COI0	38600	OK	0.773834	0.321563	-1.26692	-1.42403	0.19285	0.998514	no
AT1G04620.1	1:1282162-1286619	COI0	38600	OK	7.45041	11.3488	0.607147	1.9901	0.0745	0.896986	no
AT1G04623.1	1:2394235-2394474	COI0	38600	NOTEST	0	0	0	0	1	1	no
AT1G04625.1	1:1287830-1291112	COI0	38600	OK	26.4211	22.7588	-0.215267	-0.601065	0.53825	0.998514	no
AT1G04635.1	1:1291299-1293398	COI0	38600	OK	44.2412	55.0859	0.316292	1.08794	0.27915	0.998514	no
AT1G04645.1	1:1293769-1294263	COI0	38600	OK	2.36883	1.10482	-1.10037	-1.96234	0.3902	0.998514	no
AT1G04650.1	1:1294626-1299023	COI0	38600	OK	1.09339	1.15442	0.0783635	0.127965	0.89905	0.998514	no
AT1G04653.1	1:2629835-2630042	COI0	38600	NOTEST	0	0	0	0	1	1	no
AT1G04657.1	1:2736597-2747967	COI0	38600	NOTEST	0	0	0	0	1	1	no
AT1G04660.1	1:1300367-1301773	COI0	38600	OK	1.61234	0.295638	-2.44725	-3.17093	0.0592	0.83585	no
AT1G04667.1	1:2825587-2825978	COI0	38600	NOTEST	0	0	0	0	1	1	no
AT1G04670.1	1:1301828-1302758	COI0	38600	OK	1.94362	0.154291	-3.65502	-2.906	0.1195	0.998514	no
AT1G04673.1	1:2861645-2861854	COI0	38600	NOTEST	0	0	0	0	1	1	no
AT1G04677.1	1:2864582-2865011	COI0	38600	NOTEST	0.456387	0	#NAME?	0	1	1	no
AT1G04680.1	1:1303466-1307973	COI0	38600	OK	36.4851	33.8334	-0.108858	-0.375589	0.69265	0.998514	no
AT1G04683.1	1:2865517-2865792	COI0	38600	NOTEST	0	0	0	0	1	1	no
AT1G04687.1	1:2987675-2988104	COI0	38600	NOTEST	0	0	0	0	1	1	no
AT1G04690.1	1:1313442-1315823	COI0	38600	OK	81.3168	90.0842	0.147722	0.67023	0.5997	0.998514	no
AT1G04693.1	1:2987675-2988104	COI0	38600	NOTEST	0	0	0	0	1	1	no
AT1G04697.1	1:3031045-3035396	COI0	38600	NOTEST	0	0.234317	inf	0	1	1	no
AT1G04700.1	1:1316138-1321000	COI0	38600	OK	0.808713	0.555335	-0.54227	-0.844895	0.39515	0.998514	no
AT1G04703.1	1:3083819-3084222	COI0	38600	NOTEST	0	0	0	0	1	1	no
AT1G04707.1	1:3111693-3116699	COI0	38600	OK	6.08316	1.40936	-2.10978	-0.837616	0.53015	0.998514	no
AT1G04710.1	1:1321884-1324840	COI0	38600	OK	20.6374	25.1941	0.287825	1.05487	0.33425	0.998514	no
AT1G04713.1	1:3125174-3127284	COI0	38600	OK	2.02566	1.66139	-0.286003	-0.0995186	0.74575	0.998514	no
AT1G04717.1	1:3131951-3132215	COI0	38600	NOTEST	0	0	0	0	1	1	no
AT1G04720.1	1:1324922-1325007	COI0	38600	NOTEST	0	0	0	0	1	1	no
AT1G04723.1	1:3171904-3180736	COI0	38600	NOTEST	0	0.25927	inf	0	1	1	no
AT1G04730.1	1:1325098-1331169	COI0	38600	OK	3.91079	4.03496	0.0450975	0.116695	0.90735	0.998514	no
AT1G04737.1	1:3201684-3205411	COI0	38600	NOTEST	0	0	0	0	1	1	no
AT1G04743.1	1:3201684-3205411	COI0	38600	NOTEST	0.205255	0.339943	0.727875	0	1	1	no
AT1G04747.1	1:3205578-3213468	COI0	38600	NOTEST	0	0	0	0	1	1	no
AT1G04750.1	1:1331465-1333651	COI0	38600	OK	76.6263	66.5496	-0.20341	-0.719229	0.4633	0.998514	no
AT1G04753.1	1:3247778-3248058	COI0	38600	NOTEST	0	0	0	0	1	1	no
AT1G04760.1	1:1334532-1337849	COI0	38600	OK	2.68591	2.20271	-0.286126	-0.341779	0.80185	0.998514	no
AT1G04763.1	1:3302152-3302419	COI0	38600	NOTEST	0	0	0	0	1	1	no
AT1G04767.1	1:3302563-3303938	COI0	38600	OK	1.11688	1.05965	-0.075878	-0.0828012	0.9406	0.998514	no
AT1G04770.1	1:1334532-1337849	COI0	38600	OK	31.4311	21.3978	-0.554731	-1.68818	0.0876	0.937905	no
AT1G04773.1	1:3304038-3306956	COI0	38600	OK	0.624936	0.729768	0.223728	0.068918	0.83405	0.998514	no
AT1G04778.1	1:1339587-1343793	COI0	38600	OK	1.07322	0.653113	-0.716544	-0.236762	0.8017	0.998514	no
AT1G04780.1	1:1339587-1343793	COI0	38600	OK	27.3198	27.9825	0.0345761	0.122687	0.89485	0.998514	no
AT1G04783.1	1:3361409-3362012	COI0	38600	NOTEST	0	0	0	0	1	1	no
AT1G04787.1	1:3406208-3406622	COI0	38600	NOTEST	0	0	0	0	1	1	no
AT1G04790.1	1:1344988-1349478	COI0	38600	OK	22.1038	21.7014	-0.0265008	-0.0718432	0.945	0.998514	no
AT1G04793.1	1:3422719-3423058	COI0	38600	NOTEST	0	0	0	0	1	1	no
AT1G04797.1	1:3469511-3472674	COI0	38600	NOTEST	0	0.37052	inf	0	1	1	no
AT1G04800.1	1:1344988-1349478	COI0	38600	OK	75.9193	45.7757	-0.729886	-1.7774	0.07255	0.890072	no
AT1G04803.1	1:3469511-3472674	COI0	38600	NOTEST	0.652287	0	#NAME?	0	1	1	no
AT1G04807.1	1:3512738-3518035	COI0	38600	NOTEST	0	0	0	0	1	1	no
AT1G04810.1	1:1350079-1355466	COI0	38600	OK	16.7825	20.2398	0.27024	0.989604	0.34195	0.998514	no
AT1G04813.1	1:3529513-3529759	COI0	38600	NOTEST	0	0	0	0	1	1	no
AT1G04817.1	1:3574311-3578783	COI0	38600	NOTEST	0	0	0	0	1	1	no
AT1G04820.1	1:1356083-1362019	COI0	38600	OK	260.312	254.474	-0.0327238	-0.124594	0.91535	0.998514	no
AT1G04823.1	1:3611489-3616308	COI0	38600	NOTEST	0	0	0	0	1	1	no
AT1G04827.1	1:3611489-3616308	COI0	38600	NOTEST	0	0.322069	inf	0	1	1	no
AT1G04833.1	1:3681678-3684169	COI0	38600	OK	12.3442	14.9141	0.272843	0.88237	0.36455	0.998514	no
AT1G04840.1	1:1362226-1365027	COI0	38600	OK	1.05417	1.18481	0.168537	0.324016	0.7955	0.998514	no
AT1G04847.1	1:3837693-3846956	COI0	38600	NOTEST	0	0	0	0	1	1	no
AT1G04850.1	1:1365106-1368940	COI0	38600	OK	53.7675	62.7301	0.222424	0.797508	0.4231	0.998514	no
AT1G04853.1	1:3874395-3877323	COI0	38600	NOTEST	0	0	0	0	1	1	no
AT1G04857.1	1:3891769-3891972	COI0	38600	NOTEST	0	0	0	0	1	1	no
AT1G04860.1	1:1369035-1373103	COI0	38600	OK	14.8521	20.2645	0.448288	1.72504	0.1138	0.998514	no
AT1G04863.1	1:3937245-3937780	COI0	38600	NOTEST	0	0	0	0	1	1	no
AT1G04867.1	1:3943178-3943430	COI0	38600	NOTEST	0	0	0	0	1	1	no
AT1G04870.1	1:1373233-1379228	COI0	38600	OK	34.2931	32.5641	-0.0746331	-0.282022	0.7883	0.998514	no
AT1G04873.1	1:3948713-3957044	COI0	38600	OK	51.932	177.513	1.77323	8.61913	0.3852	0.998514	no
AT1G04877.1	1:3960943-3961245	COI0	38600	NOTEST	2.11192	0	#NAME?	0	1	1	no
AT1G04883.1	1:3967475-3971911	COI0	38600	NOTEST	0	0	0	0	1	1	no
AT1G04890.1	1:1380381-1382599	COI0	38600	NOTEST	0.0492495	0	#NAME?	0	1	1	no
AT1G04893.1	1:3989762-3993707	COI0	38600	NOTEST	0	0	0	0	1	1	no
AT1G04895.1	1:1382789-1383422	COI0	38600	NOTEST	0	0	0	0	1	1	no
AT1G04897.1	1:4001112-4007020	COI0	38600	NOTEST	0	0	0	0	1	1	no
AT1G04900.1	1:1383840-1391381	COI0	38600	OK	10.8883	10.8714	-0.00223976	-0.00489795	0.99555	0.998514	no
AT1G04907.1	1:4007236-4007396	COI0	38600	NOTEST	25.5869	0	#NAME?	0	1	1	no
AT1G04910.1	1:1383840-1391381	COI0	38600	OK	24.2412	19.731	-0.296999	-0.904768	0.3568	0.998514	no
AT1G04913.1	1:4010756-4014688	COI0	38600	NOTEST	0	0	0	0	1	1	no
AT1G04920.1	1:1391433-1395953	COI0	38600	OK	1.56798	1.52501	-0.0400928	-0.0766985	0.9274	0.998514	no
AT1G04923.1	1:4068820-4069413	COI0	38600	NOTEST	0	0	0	0	1	1	no
AT1G04927.1	1:4121284-4125651	COI0	38600	NOTEST	0.491197	0	#NAME?	0	1	1	no
AT1G04930.1	1:1396264-1399122	COI0	38600	OK	6.14535	4.25532	-0.530227	-1.19096	0.22505	0.998514	no
AT1G04937.1	1:4168883-4169086	COI0	38600	NOTEST	0	0	0	0	1	1	no
AT1G04940.1	1:1399173-1407531	COI0	38600	OK	66.1547	85.8548	0.376056	1.61151	0.26395	0.998514	no
AT1G04943.1	1:4191062-4191268	COI0	38600	NOTEST	0	0	0	0	1	1	no
AT1G04947.1	1:4191470-4191780	COI0	38600	NOTEST	0	0	0	0	1	1	no
AT1G04950.1	1:1399173-1407531	COI0	38600	OK	15.9544	17.1425	0.103624	0.207679	0.8304	0.998514	no
AT1G04953.1	1:4250944-4259300	COI0	38600	OK	4.70452	3.20553	-0.553483	-0.297915	0.77785	0.998514	no
AT1G04957.1	1:4261917-4262359	COI0	38600	NOTEST	0	0	0	0	1	1	no
AT1G04960.1	1:1407771-1410933	COI0	38600	OK	35.098	39.4968	0.170347	0.578446	0.5541	0.998514	no
AT1G04963.1	1:4289279-4289536	COI0	38600	NOTEST	0	0	0	0	1	1	no
AT1G04967.1	1:4338941-4339323	COI0	38600	NOTEST	0	0	0	0	1	1	no
AT1G04970.1	1:1411087-1413627	COI0	38600	OK	34.6537	42.1225	0.281584	0.986133	0.30905	0.998514	no
AT1G04973.1	1:4367255-4371298	COI0	38600	NOTEST	0.159611	0.184437	0.208569	0	1	1	no
AT1G04977.1	1:4367255-4371298	COI0	38600	OK	95.3726	92.3901	-0.0458363	-0.0909522	0.9277	0.998514	no
AT1G04980.1	1:1413643-1416218	COI0	38600	OK	12.4404	18.2791	0.555158	2.19124	0.1015	0.980785	no
AT1G04985.1	1:1416341-1421863	COI0	38600	OK	46.3314	50.1586	0.114506	0.448493	0.67715	0.998514	no
AT1G04987.1	1:4457270-4457513	COI0	38600	NOTEST	0	0	0	0	1	1	no
at1g04993	1:4525270-4525360	COI0	38600	NOTEST	0	0	0	0	1	1	no
AT1G04997.1	1:4526959-4527364	COI0	38600	NOTEST	0	0	0	0	1	1	no
AT1G05000.1	1:1425538-1428869	COI0	38600	OK	24.6403	18.6631	-0.400828	-1.21217	0.2169	0.998514	no
AT1G05003.1	1:4532192-4532450	COI0	38600	NOTEST	0	0	0	0	1	1	no
AT1G05005.1	1:1429047-1430056	COI0	38600	NOTEST	0	0	0	0	1	1	no
AT1G05007.1	1:4580079-4580364	COI0	38600	NOTEST	0	0	0	0	1	1	no
AT1G05010.1	1:1431176-1433010	COI0	38600	OK	170.247	128.487	-0.406016	-1.41186	0.16055	0.998514	no
AT1G05013.1	1:4611525-4611773	COI0	38600	NOTEST	0	0	0	0	1	1	no
AT1G05017.1	1:4693281-4696023	COI0	38600	NOTEST	0	0	0	0	1	1	no
AT1G05020.1	1:1435154-1437763	COI0	38600	NOTEST	0.391836	0.523903	0.419051	0	1	1	no
AT1G05023.1	1:4693281-4696023	COI0	38600	OK	1.3737	2.20567	0.683144	0.116855	0.4383	0.998514	no
AT1G05027.1	1:4697500-4698167	COI0	38600	NOTEST	0	0	0	0	1	1	no
AT1G05030.1	1:1438047-1441933	COI0	38600	OK	10.8086	9.75205	-0.148406	-0.424733	0.66355	0.998514	no
AT1G05033.1	1:4713432-4718269	COI0	38600	OK	2.26747	2.98635	0.397297	0.405774	0.8522	0.998514	no
AT1G05035.1	1:1444691-1446116	COI0	38600	NOTEST	0	0	0	0	1	1	no
AT1G05037.1	1:4772746-4772952	COI0	38600	NOTEST	0	0	0	0	1	1	no
AT1G05040.1	1:1447368-1448463	COI0	38600	NOTEST	0	0	0	0	1	1	no
AT1G05043.1	1:4797357-4801850	COI0	38600	OK	0.640348	1.08968	0.766978	0.120354	0.54595	0.998514	no
AT1G05047.1	1:4802719-4807517	COI0	38600	OK	12.1331	9.47756	-0.35636	-0.263822	0.78955	0.998514	no
AT1G05053.1	1:4832650-4832858	COI0	38600	NOTEST	0	0	0	0	1	1	no
AT1G05055.1	1:1448630-1450901	COI0	38600	OK	9.43836	9.24712	-0.0295326	-0.100852	0.94015	0.998514	no
AT1G05057.1	1:4842274-4842469	COI0	38600	NOTEST	0	0	0	0	1	1	no
AT1G05060.1	1:1451001-1452872	COI0	38600	OK	26.2959	27.4345	0.0611545	0.226012	0.84665	0.998514	no
AT1G05065.1	1:1454605-1455322	COI0	38600	NOTEST	0.713502	0.787452	0.142275	0	1	1	no
AT1G05067.1	1:4902918-4903476	COI0	38600	NOTEST	0	0	0	0	1	1	no
AT1G05070.1	1:1457006-1458802	COI0	38600	OK	25.3011	25.5933	0.0165671	0.0557076	0.95575	0.998514	no
AT1G05073.1	1:4902918-4903476	COI0	38600	NOTEST	0	0	0	0	1	1	no
AT1G05077.1	1:4915490-4921682	COI0	38600	NOTEST	0	0	0	0	1	1	no
AT1G05080.1	1:1459090-1460579	COI0	38600	NOTEST	0.268619	0	#NAME?	0	1	1	no
AT1G05083.1	1:4915490-4921682	COI0	38600	NOTEST	0	0.164986	inf	0	1	1	no
AT1G05085.1	1:1460987-1461670	COI0	38600	NOTEST	0	0	0	0	1	1	no
AT1G05087.1	1:1463107-1464173	COI0	38600	OK	3.80583	3.61953	-0.072409	-0.119662	0.9023	0.998514	no
AT1G05090.1	1:1464238-1465875	COI0	38600	OK	1.13178	0.4187	-1.43461	-1.82816	0.14105	0.998514	no
AT1G05093.1	1:4948637-4953522	COI0	38600	NOTEST	0	0	0	0	1	1	no
AT1G05097.1	1:4994638-4994874	COI0	38600	NOTEST	0	0	0	0	1	1	no
AT1G05100.1	1:1469540-1470881	COI0	38600	OK	1.05569	2.19852	1.05835	1.48753	0.1319	0.998514	no
AT1G05103.1	1:4996757-4997187	COI0	38600	OK	0.875107	0	#NAME?	#NAME?	0.00405	0.219565	no
AT1G05107.1	1:4996757-4997187	COI0	38600	NOTEST	0	0	0	0	1	1	no
AT1G05113.1	1:5031942-5036720	COI0	38600	NOTEST	0	0	0	0	1	1	no
AT1G05117.1	1:5051297-5051561	COI0	38600	NOTEST	0	0	0	0	1	1	no
AT1G05120.1	1:1471322-1476289	COI0	38600	OK	13.209	10.6415	-0.311822	-1.04404	0.2892	0.998514	no
AT1G05123.1	1:5099571-5104850	COI0	38600	NOTEST	0	0	0	0	1	1	no
AT1G05127.1	1:5131511-5131859	COI0	38600	NOTEST	0	0	0	0	1	1	no
AT1G05133.1	1:5146657-5147266	COI0	38600	NOTEST	0	0	0	0	1	1	no
AT1G05136.1	1:1478922-1479063	COI0	38600	NOTEST	0	0	0	0	1	1	no
AT1G05140.1	1:1482545-1484059	COI0	38600	OK	73.9956	106.488	0.52518	2.40986	0.05975	0.838779	no
AT1G05143.1	1:5177479-5181402	COI0	38600	NOTEST	0	0	0	0	1	1	no
AT1G05147.1	1:5177479-5181402	COI0	38600	OK	4.05316	4.12105	0.0239642	0.0151747	0.97175	0.998514	no
AT1G05150.1	1:1484066-1487027	COI0	38600	OK	20.944	19.1042	-0.132647	-0.576112	0.6408	0.998514	no
AT1G05153.1	1:5191673-5192854	COI0	38600	NOTEST	0	0	0	0	1	1	no
AT1G05160.1	1:1487377-1494248	COI0	38600	OK	16.6803	16.7705	0.00778178	0.026445	0.97825	0.998514	no
AT1G05163.1	1:5297846-5303522	COI0	38600	OK	1.17946	0.849124	-0.474078	-0.20712	0.8263	0.998514	no
AT1G05173.1	1:5356373-5356587	COI0	38600	NOTEST	0	0	0	0	1	1	no
AT1G05177.1	1:5396177-5396631	COI0	38600	NOTEST	0	0	0	0	1	1	no
AT1G05180.1	1:1498113-1501953	COI0	38600	OK	21.8497	24.6182	0.172115	0.580223	0.55595	0.998514	no
AT1G05190.1	1:1502250-1503853	COI0	38600	OK	231.978	338.93	0.546997	1.9899	0.07085	0.883389	no
AT1G05193.1	1:5410577-5410827	COI0	38600	NOTEST	0	0	0	0	1	1	no
AT1G05197.1	1:5421187-5421431	COI0	38600	NOTEST	0	0	0	0	1	1	no
AT1G05200.1	1:1504940-1510341	COI0	38600	OK	24.4501	18.6914	-0.387468	-1.55795	0.2147	0.998514	no
AT1G05203.1	1:5444219-5447880	COI0	38600	NOTEST	1.10415	0.969904	-0.187026	0	1	1	no
AT1G05205.1	1:1504940-1510341	COI0	38600	OK	19.842	15.4054	-0.365124	-0.534547	0.6502	0.998514	no
AT1G05207.1	1:5444219-5447880	COI0	38600	OK	63.2504	123.594	0.966457	0.17726	0.79965	0.998514	no
AT1G05210.1	1:1510403-1511683	COI0	38600	OK	11.5997	7.55123	-0.619302	-2.04696	0.2511	0.998514	no
AT1G05217.1	1:5521652-5521896	COI0	38600	NOTEST	0	0	0	0	1	1	no
AT1G05220.1	1:1511894-1518900	COI0	38600	NOTEST	0.800313	0.394707	-1.01978	0	1	1	no
AT1G05223.1	1:5552867-5553111	COI0	38600	NOTEST	0	0	0	0	1	1	no
AT1G05227.1	1:5625698-5631131	COI0	38600	OK	3.30106	2.31561	-0.511538	-0.76081	0.5715	0.998514	no
AT1G05230.1	1:1511894-1518900	COI0	38600	OK	16.5911	14.4043	-0.203908	-0.693104	0.4689	0.998514	no
AT1G05233.1	1:5642763-5642985	COI0	38600	NOTEST	0	0	0	0	1	1	no
AT1G05237.1	1:5646665-5646969	COI0	38600	NOTEST	0	0	0	0	1	1	no
AT1G05240.1	1:1520277-1523023	COI0	38600	NOTEST	0	0.0384538	inf	0	1	1	no
AT1G05243.1	1:5668383-5673600	COI0	38600	NOTEST	0	0.355539	inf	0	1	1	no
AT1G05250.1	1:1525600-1527360	COI0	38600	NOTEST	0.044762	0	#NAME?	0	1	1	no
AT1G05253.1	1:5722890-5727406	COI0	38600	OK	178.059	316.835	0.831379	3.42347	0.23255	0.998514	no
AT1G05257.1	1:5722890-5727406	COI0	38600	NOTEST	0	0	0	0	1	1	no
AT1G05260.1	1:1529766-1531484	COI0	38600	OK	6.09322	4.52728	-0.428559	-0.937558	0.3454	0.998514	no
AT1G05263.1	1:5733332-5733554	COI0	38600	NOTEST	0	0	0	0	1	1	no
AT1G05267.1	1:5755587-5758653	COI0	38600	OK	0	1.04878	inf	#NAME?	0.1945	0.998514	no
AT1G05270.1	1:1531640-1534767	COI0	38600	OK	27.6361	27.4472	-0.00989208	-0.0400008	0.97295	0.998514	no
AT1G05277.1	1:5773511-5778529	COI0	38600	OK	0.470256	1.09654	1.22145	0.112356	0.3056	0.998514	no
AT1G05280.1	1:1534829-1537602	COI0	38600	NOTEST	0.274418	0.0445621	-2.62249	0	1	1	no
AT1G05283.1	1:5828816-5831383	COI0	38600	NOTEST	0	0	0	0	1	1	no
AT1G05287.1	1:5837498-5841745	COI0	38600	NOTEST	0.453464	0	#NAME?	0	1	1	no
AT1G05290.1	1:1539151-1540562	COI0	38600	NOTEST	0.664605	0	#NAME?	0	1	1	no
AT1G05291.1	1:1541347-1542432	COI0	38600	NOTEST	0.157132	0	#NAME?	0	1	1	no
AT1G05293.1	1:5854092-5858550	COI0	38600	NOTEST	0	0	0	0	1	1	no
AT1G05297.1	1:5854092-5858550	COI0	38600	NOTEST	0.670685	0	#NAME?	0	1	1	no
AT1G05300.1	1:1544926-1547849	COI0	38600	OK	2.22046	2.33427	0.0721114	0.12587	0.8899	0.998514	no
AT1G05303.1	1:5946447-5957511	COI0	38600	NOTEST	0	0	0	0	1	1	no
AT1G05307.1	1:5962529-5962906	COI0	38600	NOTEST	0	0	0	0	1	1	no
AT1G05310.1	1:1550502-1552587	COI0	38600	OK	1.66137	1.81924	0.130961	0.219039	0.84175	0.998514	no
AT1G05313.1	1:5975211-5975631	COI0	38600	NOTEST	0	0	0	0	1	1	no
AT1G05317.1	1:6100960-6105347	COI0	38600	NOTEST	0	0	0	0	1	1	no
AT1G05320.1	1:1553567-1557848	COI0	38600	OK	10.7362	14.0508	0.388165	1.24687	0.2067	0.998514	no
AT1G05323.1	1:6106322-6116617	COI0	38600	OK	1.82493	9.34072	2.35569	2.73619	0.51785	0.998514	no
AT1G05330.1	1:1558057-1558745	COI0	38600	OK	1.24497	0.56285	-1.14529	-1.46614	0.38045	0.998514	no
AT1G05333.1	1:6130024-6135345	COI0	38600	NOTEST	0.570926	0.394755	-0.532346	0	1	1	no
AT1G05337.1	1:6142401-6148940	COI0	38600	NOTEST	0	0	0	0	1	1	no
AT1G05340.1	1:1558777-1559917	COI0	38600	OK	17.6504	19.012	0.107209	0.419605	0.7922	0.998514	no
AT1G05343.1	1:6142401-6148940	COI0	38600	NOTEST	0	0	0	0	1	1	no
AT1G05350.1	1:1560677-1564409	COI0	38600	OK	20.0955	16.6857	-0.268263	-1.12822	0.38425	0.998514	no
AT1G05353.1	1:6149177-6152222	COI0	38600	NOTEST	0	0	0	0	1	1	no
AT1G05357.1	1:6161869-6165820	COI0	38600	OK	1.20797	1.86777	0.628729	0.139115	0.5561	0.998514	no
AT1G05360.1	1:1564490-1567508	COI0	38600	OK	12.9251	16.9368	0.389983	1.10301	0.25945	0.998514	no
AT1G05363.1	1:6202234-6209528	COI0	38600	NOTEST	0	0	0	0	1	1	no
AT1G05367.1	1:6202234-6209528	COI0	38600	NOTEST	0	0	0	0	1	1	no
AT1G05370.1	1:1569146-1572469	COI0	38600	OK	1.99744	2.11005	0.0791226	0.14978	0.8945	0.998514	no
AT1G05373.1	1:6219398-6219730	COI0	38600	NOTEST	0	0	0	0	1	1	no
AT1G05377.1	1:6219398-6219730	COI0	38600	NOTEST	0	0	0	0	1	1	no
AT1G05380.1	1:1576821-1583760	COI0	38600	OK	18.0058	22.0404	0.291689	1.02239	0.33735	0.998514	no
AT1G05383.1	1:6224404-6230194	COI0	38600	NOTEST	0	0	0	0	1	1	no
AT1G05385.1	1:1576821-1583760	COI0	38600	OK	28.1569	38.8686	0.46512	0.675892	0.48905	0.998514	no
AT1G05387.1	1:6269848-6270159	COI0	38600	NOTEST	0	0	0	0	1	1	no
AT1G05390.1	1:1583771-1583845	COI0	38600	NOTEST	0	0	0	0	1	1	no
AT1G05397.1	1:6271816-6272422	COI0	38600	NOTEST	0.294848	0.958967	1.70151	0	1	1	no
AT1G05400.1	1:1584072-1587794	COI0	38600	OK	2.94326	2.53726	-0.214139	-0.235132	0.8489	0.998514	no
AT1G05407.1	1:6449228-6449681	COI0	38600	OK	3.13201	0	#NAME?	#NAME?	0.00405	0.219565	no
AT1G05410.1	1:1584072-1587794	COI0	38600	OK	18.6102	17.926	-0.0540392	-0.168715	0.8583	0.998514	no
AT1G05413.1	1:6449228-6449681	COI0	38600	NOTEST	0	0	0	0	1	1	no
AT1G05420.2	1:1589972-1591012	COI0	38600	OK	1.31433	0.817142	-0.685668	-0.798151	0.41645	0.998514	no
AT1G05430.1	1:1594052-1595923	COI0	38600	OK	41.4159	31.9365	-0.374978	-1.72521	0.21685	0.998514	no
AT1G05440.1	1:1596006-1597940	COI0	38600	OK	2.39134	2.0145	-0.247395	-0.482162	0.67625	0.998514	no
AT1G05443.1	1:6500049-6500381	COI0	38600	NOTEST	0	0	0	0	1	1	no
AT1G05447.1	1:6508775-6511397	COI0	38600	NOTEST	0	0	0	0	1	1	no
AT1G05450.1	1:1599875-1605034	COI0	38600	OK	4.10672	0.80527	-2.35044	-1.99938	0.18775	0.998514	no
AT1G05453.1	1:6520720-6526075	COI0	38600	OK	22.4367	29.2681	0.383467	0.540889	0.58335	0.998514	no
AT1G05460.1	1:1599875-1605034	COI0	38600	OK	7.69711	7.78222	0.015865	0.0466224	0.9608	0.998514	no
AT1G05463.1	1:6608114-6612609	COI0	38600	NOTEST	0	0	0	0	1	1	no
AT1G05467.1	1:6608114-6612609	COI0	38600	OK	1.03946	5.83766	2.48956	1.32054	0.4772	0.998514	no
AT1G05470.1	1:1607201-1611840	COI0	38600	OK	7.02847	9.53716	0.440349	1.35956	0.1683	0.998514	no
AT1G05473.1	1:6620853-6621071	COI0	38600	NOTEST	0	0	0	0	1	1	no
AT1G05477.1	1:6635119-6635338	COI0	38600	NOTEST	0	0	0	0	1	1	no
AT1G05483.1	1:6642906-6643519	COI0	38600	NOTEST	0	0	0	0	1	1	no
AT1G05487.1	1:6642906-6643519	COI0	38600	NOTEST	0	0	0	0	1	1	no
AT1G05490.1	1:1618503-1623489	COI0	38600	OK	1.95425	1.16655	-0.744365	-1.57743	0.0966	0.967907	no
AT1G05493.1	1:6662416-6669795	COI0	38600	NOTEST	0	0	0	0	1	1	no
AT1G05497.1	1:6670302-6670780	COI0	38600	NOTEST	0	0	0	0	1	1	no
AT1G05500.1	1:1624918-1629289	COI0	38600	OK	31.9266	32.5991	0.0300765	0.10564	0.9142	0.998514	no
AT1G05507.1	1:6813646-6814005	COI0	38600	NOTEST	0	0	0	0	1	1	no
AT1G05510.1	1:1629445-1636018	COI0	38600	NOTEST	0	0	0	0	1	1	no
AT1G05517.1	1:6941872-6942155	COI0	38600	NOTEST	0	0	0	0	1	1	no
AT1G05520.1	1:1629445-1636018	COI0	38600	OK	23.8074	23.069	-0.0454531	-0.16018	0.86645	0.998514	no
AT1G05530.1	1:1636248-1637914	COI0	38600	NOTEST	0.132639	0.154652	0.221517	0	1	1	no
AT1G05533.1	1:6961364-6961574	COI0	38600	NOTEST	6.20306	0	#NAME?	0	1	1	no
AT1G05537.1	1:7046122-7046378	COI0	38600	NOTEST	0	0	0	0	1	1	no
AT1G05540.1	1:1639222-1640879	COI0	38600	OK	13.1095	11.1945	-0.227825	-0.647992	0.50885	0.998514	no
AT1G05543.1	1:7049115-7049939	COI0	38600	NOTEST	0	0	0	0	1	1	no
AT1G05547.1	1:7050830-7051140	COI0	38600	NOTEST	0	0	0	0	1	1	no
AT1G05550.1	1:1640958-1643917	COI0	38600	OK	1.16268	1.33205	0.196189	0.229242	0.7956	0.998514	no
AT1G05553.1	1:7090940-7093593	COI0	38600	OK	1.97266	1.66558	-0.244116	-0.10994	0.88745	0.998514	no
AT1G05557.1	1:7094007-7097147	COI0	38600	NOTEST	0	0	0	0	1	1	no
AT1G05560.2	1:1645299-1647435	COI0	38600	OK	53.4965	65.1803	0.28499	1.01673	0.29395	0.998514	no
AT1G05567.1	1:7199047-7199427	COI0	38600	NOTEST	0	0	0	0	1	1	no
AT1G05570.1	1:1647574-1659611	COI0	38600	OK	16.7923	15.5036	-0.115192	-0.408984	0.67795	0.998514	no
AT1G05575.1	1:1661407-1662259	COI0	38600	OK	1.62557	3.14619	0.95266	1.09527	0.27705	0.998514	no
AT1G05577.1	1:1662351-1664398	COI0	38600	OK	1.43562	0.22544	-2.67086	-2.89582	0.0465	0.766803	no
AT1G05580.1	1:1665355-1668924	COI0	38600	OK	0.923277	0	#NAME?	#NAME?	5e-05	0.00838689	yes
AT1G05583.1	1:7223054-7223257	COI0	38600	NOTEST	0	0	0	0	1	1	no
AT1G05587.1	1:7223475-7223713	COI0	38600	NOTEST	0	0	0	0	1	1	no
AT1G05590.1	1:1669349-1676077	COI0	38600	OK	18.3305	19.2654	0.0717667	0.302774	0.81855	0.998514	no
AT1G05593.1	1:7223759-7224256	COI0	38600	NOTEST	0	0	0	0	1	1	no
AT1G05597.1	1:7225308-7225775	COI0	38600	NOTEST	0	0	0	0	1	1	no
AT1G05603.1	1:7225308-7225775	COI0	38600	NOTEST	0	0	0	0	1	1	no
AT1G05607.1	1:7242895-7248588	COI0	38600	NOTEST	0	0	0	0	1	1	no
AT1G05610.1	1:1669349-1676077	COI0	38600	OK	1.11203	1.47781	0.410257	0.288198	0.78445	0.998514	no
AT1G05613.1	1:7336673-7336952	COI0	38600	NOTEST	0	0	0	0	1	1	no
AT1G05615.1	1:1677506-1678270	COI0	38600	NOTEST	0	0	0	0	1	1	no
AT1G05617.1	1:7344746-7345128	COI0	38600	NOTEST	0	0	0	0	1	1	no
AT1G05620.1	1:1678880-1681710	COI0	38600	OK	12.3909	7.95221	-0.639853	-1.67327	0.0873	0.936932	no
AT1G05623.1	1:7370610-7370903	COI0	38600	NOTEST	0	0	0	0	1	1	no
at1g05627	1:7400801-7400992	COI0	38600	NOTEST	0	0	0	0	1	1	no
AT1G05630.1	1:1682223-1687363	COI0	38600	OK	6.76687	5.90272	-0.197109	-0.637872	0.51575	0.998514	no
AT1G05633.1	1:7401344-7401549	COI0	38600	NOTEST	0	0	0	0	1	1	no
at1g05637	1:7421147-7427041	COI0	38600	NOTEST	0	0	0	0	1	1	no
AT1G05640.1	1:1687435-1692179	COI0	38600	OK	2.53097	1.87169	-0.435354	-0.83773	0.3905	0.998514	no
AT1G05643.1	1:7433800-7434105	COI0	38600	NOTEST	0	0	0	0	1	1	no
AT1G05647.1	1:7460103-7460501	COI0	38600	NOTEST	0	0	0	0	1	1	no
AT1G05653.1	1:7471089-7471300	COI0	38600	NOTEST	0	0	0	0	1	1	no
AT1G05657.1	1:7473010-7473358	COI0	38600	NOTEST	0	0	0	0	1	1	no
AT1G05660.1	1:1694069-1696191	COI0	38600	NOTEST	0.0396012	0	#NAME?	0	1	1	no
AT1G05663.1	1:7490991-7491645	COI0	38600	NOTEST	0	0	0	0	1	1	no
AT1G05667.1	1:7490991-7491645	COI0	38600	NOTEST	0	0	0	0	1	1	no
AT1G05670.1	1:1697540-1701065	COI0	38600	OK	4.12845	4.08054	-0.0168405	-0.0429442	0.96715	0.998514	no
AT1G05675.1	1:1701115-1702749	COI0	38600	OK	1.25398	1.55642	0.311711	0.550818	0.6712	0.998514	no
AT1G05680.1	1:1703001-1704838	COI0	38600	OK	9.45768	7.33407	-0.366872	-1.17443	0.33815	0.998514	no
AT1G05683.1	1:7604409-7604655	COI0	38600	NOTEST	0	0	0	0	1	1	no
AT1G05687.1	1:7680389-7685662	COI0	38600	OK	5.60215	7.53285	0.427216	0.604129	0.56725	0.998514	no
AT1G05690.1	1:1706735-1709360	COI0	38600	OK	4.45826	7.10375	0.672098	2.17529	0.12505	0.998514	no
AT1G05693.1	1:7739695-7740012	COI0	38600	NOTEST	0	0	0	0	1	1	no
AT1G05697.1	1:7739695-7740012	COI0	38600	NOTEST	0	0	0	0	1	1	no
AT1G05700.1	1:1709672-1713474	COI0	38600	OK	0.483373	0.817554	0.758177	1.02265	0.30415	0.998514	no
AT1G05703.1	1:7771658-7781712	COI0	38600	NOTEST	0	0	0	0	1	1	no
AT1G05707.1	1:7771658-7781712	COI0	38600	NOTEST	0	0.391282	inf	0	1	1	no
AT1G05710.1	1:1714817-1717290	COI0	38600	OK	13.5367	14.4344	0.0926358	0.258704	0.78895	0.998514	no
AT1G05713.1	1:7797592-7797802	COI0	38600	NOTEST	0	0	0	0	1	1	no
AT1G05717.1	1:7814472-7815722	COI0	38600	NOTEST	0	0	0	0	1	1	no
AT1G05720.1	1:1717388-1721309	COI0	38600	OK	17.2544	10.5005	-0.716505	-2.36898	0.12165	0.998514	no
AT1G05723.1	1:7826267-7830424	COI0	38600	NOTEST	0	0	0	0	1	1	no
AT1G05727.1	1:7826267-7830424	COI0	38600	OK	0.96651	0	#NAME?	#NAME?	0.23795	0.998514	no
AT1G05730.1	1:1717388-1721309	COI0	38600	OK	3.03978	1.69515	-0.842548	-1.04895	0.28575	0.998514	no
AT1G05733.1	1:7858863-7865263	COI0	38600	OK	4.38905	5.46986	0.317595	0.780889	0.7129	0.998514	no
AT1G05737.1	1:7872849-7873056	COI0	38600	NOTEST	0	0	0	0	1	1	no
AT1G05747.1	1:7931628-7932056	COI0	38600	NOTEST	0	0	0	0	1	1	no
AT1G05750.1	1:1721508-1724734	COI0	38600	OK	2.56781	3.216	0.324726	0.847848	0.52	0.998514	no
AT1G05753.1	1:7949475-7952832	COI0	38600	OK	18.7181	21.7365	0.215685	0.524652	0.7468	0.998514	no
AT1G05757.1	1:7949475-7952832	COI0	38600	NOTEST	0	0	0	0	1	1	no
AT1G05760.2	1:1721508-1724734	COI0	38600	OK	12.2836	10.9489	-0.165951	-0.274429	0.7868	0.998514	no
AT1G05763.1	1:8027125-8030136	COI0	38600	NOTEST	0	0	0	0	1	1	no
AT1G05770.1	1:1725387-1726321	COI0	38600	OK	2.08666	0.754108	-1.46835	-2.153	0.1791	0.998514	no
AT1G05773.1	1:8079286-8082882	COI0	38600	NOTEST	0.309769	0	#NAME?	0	1	1	no
AT1G05777.1	1:8079286-8082882	COI0	38600	NOTEST	0	0	0	0	1	1	no
AT1G05780.1	1:1726557-1728520	COI0	38600	OK	6.73138	4.07385	-0.72451	-1.20898	0.22435	0.998514	no
AT1G05783.1	1:1728657-1729890	COI0	38600	OK	1.04892	1.90996	0.864646	1.11996	0.56795	0.998514	no
AT1G05785.1	1:1730241-1732657	COI0	38600	OK	23.106	20.0656	-0.203541	-0.49877	0.61085	0.998514	no
AT1G05787.1	1:8195775-8198331	COI0	38600	OK	2.25383	0.585804	-1.94389	-0.731076	0.48165	0.998514	no
AT1G05790.1	1:1732801-1737583	COI0	38600	OK	12.0886	11.7584	-0.0399514	-0.127215	0.8927	0.998514	no
AT1G05793.1	1:8205160-8205381	COI0	38600	NOTEST	0	0	0	0	1	1	no
AT1G05797.1	1:8303207-8303425	COI0	38600	NOTEST	0	0	0	0	1	1	no
AT1G05800.1	1:1741203-1742619	COI0	38600	NOTEST	0	0	0	0	1	1	no
AT1G05803.1	1:8303800-8304028	COI0	38600	NOTEST	0	0	0	0	1	1	no
AT1G05805.1	1:1744443-1747734	COI0	38600	OK	9.37275	10.1425	0.113869	0.315974	0.7352	0.998514	no
AT1G05807.1	1:8304659-8304901	COI0	38600	NOTEST	0	0	0	0	1	1	no
AT1G05810.2	1:1748258-1754036	COI0	38600	OK	7.98036	7.12796	-0.162965	-0.409153	0.6929	0.998514	no
AT1G05813.1	1:8305916-8306115	COI0	38600	NOTEST	0	0	0	0	1	1	no
AT1G05817.1	1:8319662-8320431	COI0	38600	NOTEST	0	0	0	0	1	1	no
AT1G05823.1	1:8363894-8364276	COI0	38600	NOTEST	0	0	0	0	1	1	no
AT1G05827.1	1:8387405-8387640	COI0	38600	NOTEST	0	0	0	0	1	1	no
AT1G05830.1	1:1754129-1761909	COI0	38600	OK	13.2571	14.62	0.14117	0.493167	0.61585	0.998514	no
AT1G05833.1	1:8420264-8424088	COI0	38600	NOTEST	0.170121	0.203664	0.259624	0	1	1	no
AT1G05835.1	1:1762144-1766283	COI0	38600	OK	10.8813	6.15694	-0.821563	-1.22648	0.4621	0.998514	no
AT1G05840.1	1:1762144-1766283	COI0	38600	OK	29.495	27.2804	-0.112606	-0.353182	0.7198	0.998514	no
AT1G05850.1	1:1766502-1768837	COI0	38600	OK	263.818	259.971	-0.0211921	-0.0642917	0.94815	0.998514	no
AT1G05853.1	1:8525103-8525204	COI0	38600	NOTEST	0	0	0	0	1	1	no
AT1G05857.1	1:8539956-8540308	COI0	38600	NOTEST	0	0	0	0	1	1	no
AT1G05860.1	1:1768985-1771286	COI0	38600	OK	16.6405	17.6915	0.0883548	0.262615	0.78855	0.998514	no
AT1G05863.1	1:8598623-8598990	COI0	38600	NOTEST	0	0	0	0	1	1	no
AT1G05867.1	1:8609337-8614283	COI0	38600	NOTEST	0	0	0	0	1	1	no
AT1G05870.1	1:1771384-1773385	COI0	38600	OK	39.4943	48.1969	0.287296	1.00296	0.3075	0.998514	no
AT1G05873.1	1:8609337-8614283	COI0	38600	OK	5.62876	2.88505	-0.964222	-0.984555	0.31785	0.998514	no
AT1G05880.1	1:1775642-1778553	COI0	38600	NOTEST	0.113863	0.065089	-0.806811	0	1	1	no
AT1G05887.1	1:8649779-8650056	COI0	38600	NOTEST	0	0	0	0	1	1	no
AT1G05890.1	1:1779255-1784675	COI0	38600	OK	50.7942	45.3498	-0.163568	-0.580629	0.55645	0.998514	no
AT1G05893.1	1:8649779-8650056	COI0	38600	NOTEST	0	0	0	0	1	1	no
AT1G05894.1	1:1784735-1786326	COI0	38600	NOTEST	0.428111	0.444151	0.0530654	0	1	1	no
AT1G05897.1	1:8650621-8650899	COI0	38600	NOTEST	0	0	0	0	1	1	no
AT1G05900.1	1:1786848-1789737	COI0	38600	OK	18.3128	26.877	0.553522	1.73233	0.0822	0.921304	no
AT1G05903.1	1:8659677-8660351	COI0	38600	NOTEST	0	0	0	0	1	1	no
AT1G05907.1	1:8756227-8756570	COI0	38600	NOTEST	0	0	0	0	1	1	no
AT1G05910.1	1:1790215-1796715	COI0	38600	OK	10.2671	12.4241	0.275116	0.934507	0.334	0.998514	no
AT1G05920.1	1:1796777-1798254	COI0	38600	NOTEST	0.313906	0.241394	-0.378943	0	1	1	no
AT1G05930.1	1:1799417-1800933	COI0	38600	NOTEST	0	0	0	0	1	1	no
AT1G05933.1	1:8835385-8839609	COI0	38600	NOTEST	0	0	0	0	1	1	no
AT1G05937.1	1:8843773-8844366	COI0	38600	NOTEST	0.238	0	#NAME?	0	1	1	no
AT1G05940.1	1:1801109-1804000	COI0	38600	OK	32.1798	36.7873	0.193053	0.662813	0.49825	0.998514	no
AT1G05943.1	1:8849005-8851790	COI0	38600	NOTEST	0	0	0	0	1	1	no
AT1G05947.1	1:8852647-8853171	COI0	38600	NOTEST	0	0	0	0	1	1	no
AT1G05950.1	1:1804400-1807670	COI0	38600	OK	6.30124	5.03557	-0.323481	-0.816662	0.4165	0.998514	no
AT1G05953.1	1:8852647-8853171	COI0	38600	NOTEST	0	0	0	0	1	1	no
AT1G05957.1	1:8876311-8876558	COI0	38600	NOTEST	0	0	0	0	1	1	no
AT1G05960.1	1:1807959-1815568	COI0	38600	OK	19.8071	22.3531	0.174451	0.614951	0.53605	0.998514	no
AT1G05963.1	1:8924183-8924454	COI0	38600	NOTEST	0	0	0	0	1	1	no
AT1G05967.1	1:8941001-8941202	COI0	38600	NOTEST	0	0	0	0	1	1	no
AT1G05970.1	1:1815824-1817336	COI0	38600	OK	11.5349	12.4268	0.107445	0.248288	0.8003	0.998514	no
AT1G05973.1	1:9020379-9024081	COI0	38600	OK	22.1496	46.6322	1.07405	5.63944	0.42935	0.998514	no
AT1G05977.1	1:9020379-9024081	COI0	38600	NOTEST	0	0	0	0	1	1	no
AT1G05980.1	1:1817399-1817471	COI0	38600	NOTEST	0	0	0	0	1	1	no
AT1G05983.1	1:9032667-9032898	COI0	38600	NOTEST	0	0	0	0	1	1	no
AT1G05987.1	1:9065954-9075350	COI0	38600	NOTEST	0.423562	0	#NAME?	0	1	1	no
AT1G05990.1	1:1818391-1819184	COI0	38600	NOTEST	0.170357	0	#NAME?	0	1	1	no
AT1G05993.1	1:9076303-9076386	COI0	38600	NOTEST	0	0	0	0	1	1	no
AT1G05997.1	1:9076444-9076638	COI0	38600	NOTEST	0	0	0	0	1	1	no
AT1G06000.1	1:1820253-1821894	COI0	38600	OK	70.183	75.6854	0.108893	0.384691	0.69715	0.998514	no
AT1G06002.1	1:1820253-1821894	COI0	38600	NOTEST	0.0337702	0	#NAME?	0	1	1	no
AT1G06003.1	1:9158379-9161044	COI0	38600	OK	0.569745	1.45737	1.35498	0.706154	0.47925	0.998514	no
AT1G06007.1	1:9227340-9233206	COI0	38600	NOTEST	0	0	0	0	1	1	no
AT1G06010.1	1:1822582-1826163	COI0	38600	OK	14.6838	11.3802	-0.367705	-1.00639	0.4311	0.998514	no
AT1G06013.1	1:9240559-9240864	COI0	38600	NOTEST	0	0	0	0	1	1	no
AT1G06017.1	1:9246856-9249943	COI0	38600	NOTEST	0	0	0	0	1	1	no
AT1G06023.1	1:9257085-9257400	COI0	38600	NOTEST	0	0	0	0	1	1	no
AT1G06027.1	1:9291722-9292147	COI0	38600	NOTEST	0	0	0	0	1	1	no
AT1G06030.1	1:1826802-1828279	COI0	38600	NOTEST	0.281463	0.470422	0.741007	0	1	1	no
AT1G06033.1	1:9315304-9319246	COI0	38600	NOTEST	0	0	0	0	1	1	no
AT1G06037.1	1:9325014-9325259	COI0	38600	NOTEST	0	0	0	0	1	1	no
AT1G06040.1	1:1828339-1829983	COI0	38600	OK	247.774	235.439	-0.0736715	-0.308383	0.8	0.998514	no
AT1G06043.1	1:9424690-9424892	COI0	38600	NOTEST	0	0	0	0	1	1	no
AT1G06045.1	1:1828339-1829983	COI0	38600	OK	51.7698	12.0483	-2.10328	-0.315488	0.5187	0.998514	no
AT1G06047.1	1:9452631-9452831	COI0	38600	NOTEST	0	0	0	0	1	1	no
AT1G06050.1	1:1830470-1832555	COI0	38600	OK	6.8566	6.8005	-0.0118542	-0.0356108	0.9843	0.998514	no
AT1G06053.1	1:9459097-9459587	COI0	38600	NOTEST	0	0	0	0	1	1	no
AT1G06057.1	1:9462397-9462809	COI0	38600	NOTEST	0	0	0	0	1	1	no
AT1G06060.1	1:1832940-1837758	COI0	38600	OK	34.1918	30.3649	-0.171248	-0.523183	0.6847	0.998514	no
AT1G06063.1	1:9473379-9473719	COI0	38600	NOTEST	0	0	0	0	1	1	no
AT1G06067.1	1:9473379-9473719	COI0	38600	NOTEST	0	0	0	0	1	1	no
AT1G06070.1	1:1832940-1837758	COI0	38600	OK	19.9429	16.3885	-0.283194	-0.756744	0.43935	0.998514	no
AT1G06073.1	1:9475460-9475699	COI0	38600	NOTEST	0	0	0	0	1	1	no
AT1G06080.1	1:1843462-1846311	COI0	38600	OK	25.6674	16.0852	-0.674201	-2.04354	0.039	0.709163	no
AT1G06083.1	1:9483156-9486002	COI0	38600	NOTEST	0	1.47669	inf	0	1	1	no
AT1G06087.1	1:9515113-9517070	COI0	38600	NOTEST	0	0	0	0	1	1	no
AT1G06090.1	1:1846700-1849693	COI0	38600	OK	1.24455	0.658139	-0.919154	-1.70703	0.24525	0.998514	no
AT1G06093.1	1:9572454-9572795	COI0	38600	NOTEST	0	0	0	0	1	1	no
AT1G06097.1	1:9572454-9572795	COI0	38600	NOTEST	0	0	0	0	1	1	no
AT1G06100.1	1:1851471-1853019	COI0	38600	NOTEST	0.703408	0.811135	0.20558	0	1	1	no
AT1G06110.1	1:1853058-1855378	COI0	38600	OK	23.4464	20.599	-0.186792	-0.629686	0.5128	0.998514	no
AT1G06113.1	1:9794543-9794763	COI0	38600	NOTEST	0	0	0	0	1	1	no
AT1G06117.1	1:9799491-9799703	COI0	38600	NOTEST	0	0	0	0	1	1	no
AT1G06120.1	1:1855909-1857718	COI0	38600	NOTEST	0	0	0	0	1	1	no
AT1G06123.1	1:9800634-9800843	COI0	38600	NOTEST	0	0	0	0	1	1	no
AT1G06127.1	1:9848882-9849226	COI0	38600	NOTEST	0	0	0	0	1	1	no
AT1G06130.1	1:1857756-1860938	COI0	38600	OK	26.2007	21.6065	-0.27814	-0.907793	0.356	0.998514	no
AT1G06133.1	1:9882236-9882450	COI0	38600	NOTEST	0	0	0	0	1	1	no
AT1G06135.1	1:1862183-1862742	COI0	38600	NOTEST	0	0.528035	inf	0	1	1	no
AT1G06137.1	1:1863424-1863840	COI0	38600	NOTEST	0	0.541935	inf	0	1	1	no
AT1G06140.1	1:1864773-1866999	COI0	38600	OK	0.971859	1.67266	0.783326	1.70292	0.2814	0.998514	no
AT1G06143.1	1:1867036-1868905	COI0	38600	OK	2.47538	2.33627	-0.0834457	-0.1798	0.8754	0.998514	no
AT1G06147.1	1:9938599-9939013	COI0	38600	NOTEST	0	0	0	0	1	1	no
AT1G06148.1	1:1874884-1877573	COI0	38600	NOTEST	0.242807	0	#NAME?	0	1	1	no
AT1G06150.1	1:1868988-1873730	COI0	38600	OK	20.9632	23.5675	0.16894	0.599154	0.5377	0.998514	no
AT1G06153.1	1:9963447-9968495	COI0	38600	OK	4.01052	17.9146	2.15928	0.275796	0.37765	0.998514	no
AT1G06157.1	1:9989549-9989790	COI0	38600	NOTEST	0	0	0	0	1	1	no
AT1G06160.1	1:1882906-1883992	COI0	38600	OK	3.3789	2.56616	-0.396944	-0.711853	0.5086	0.998514	no
AT1G06163.1	1:10012636-10013263	COI0	38600	NOTEST	0	0	0	0	1	1	no
AT1G06170.1	1:1884980-1886904	COI0	38600	OK	2.66782	1.43623	-0.893376	-1.34403	0.174	0.998514	no
AT1G06173.1	1:10094621-10095222	COI0	38600	NOTEST	0	0.703216	inf	0	1	1	no
AT1G06177.1	1:10094621-10095222	COI0	38600	OK	9.11875	6.07545	-0.585846	-0.638125	0.50505	0.998514	no
AT1G06180.1	1:1889361-1891276	COI0	38600	OK	27.7014	17.9127	-0.628971	-2.23978	0.0638	0.852416	no
AT1G06187.1	1:10119307-10119662	COI0	38600	NOTEST	0	0	0	0	1	1	no
AT1G06190.1	1:1892230-1894194	COI0	38600	OK	41.2079	63.1143	0.615047	2.18645	0.02665	0.603015	no
AT1G06197.1	1:10127672-10128207	COI0	38600	NOTEST	0	0	0	0	1	1	no
AT1G06200.2	1:1894288-1897027	COI0	38600	OK	67.2286	70.0228	0.058751	0.2064	0.8313	0.998514	no
AT1G06203.1	1:10127672-10128207	COI0	38600	NOTEST	0	0	0	0	1	1	no
AT1G06207.1	1:10128998-10136241	COI0	38600	NOTEST	0	0	0	0	1	1	no
AT1G06210.1	1:1897128-1899237	COI0	38600	OK	24.9892	28.177	0.173213	0.592349	0.53925	0.998514	no
AT1G06213.1	1:10128998-10136241	COI0	38600	OK	1.18402	2.02183	0.771969	0.232988	0.7785	0.998514	no
AT1G06217.1	1:10136245-10139228	COI0	38600	NOTEST	0	0	0	0	1	1	no
AT1G06220.1	1:1899950-1904897	COI0	38600	OK	33.1167	38.2652	0.208473	0.74051	0.45725	0.998514	no
AT1G06225.1	1:1905917-1906298	COI0	38600	NOTEST	0	0	0	0	1	1	no
AT1G06227.1	1:10300192-10301302	COI0	38600	OK	3.31375	7.00825	1.08059	2.27263	0.2685	0.998514	no
AT1G06230.1	1:1906962-1917661	COI0	38600	OK	51.2362	54.4497	0.0877603	0.302548	0.78285	0.998514	no
AT1G06233.1	1:10300192-10301302	COI0	38600	NOTEST	0	0	0	0	1	1	no
AT1G06237.1	1:10300192-10301302	COI0	38600	NOTEST	0	0	0	0	1	1	no
AT1G06250.1	1:1906962-1917661	COI0	38600	OK	5.5776	5.46823	-0.0285699	-0.026431	0.9815	0.998514	no
AT1G06257.1	1:10301376-10302099	COI0	38600	OK	3.67984	1.76335	-1.06133	-0.767771	0.41655	0.998514	no
AT1G06260.1	1:1906962-1917661	COI0	38600	OK	17.7203	6.2446	-1.50472	-1.36299	0.20555	0.998514	no
AT1G06267.1	1:10308519-10309896	COI0	38600	NOTEST	0	0	0	0	1	1	no
AT1G06270.1	1:1917990-1919760	COI0	38600	OK	4.09984	6.67402	0.702988	2.13703	0.13935	0.998514	no
AT1G06273.1	1:10308519-10309896	COI0	38600	NOTEST	0	0	0	0	1	1	no
AT1G06277.1	1:10308519-10309896	COI0	38600	NOTEST	0	0	0	0	1	1	no
AT1G06280.1	1:1920306-1920949	COI0	38600	OK	3.51241	0.646873	-2.44091	-3.67574	0.08925	0.942944	no
AT1G06283.1	1:10308519-10309896	COI0	38600	NOTEST	0	0	0	0	1	1	no
AT1G06287.1	1:10327137-10329121	COI0	38600	OK	0	4.22861	inf	#NAME?	0.14375	0.998514	no
AT1G06290.1	1:1922207-1926278	COI0	38600	OK	32.6668	39.175	0.26211	0.991189	0.34415	0.998514	no
AT1G06293.1	1:10383998-10384275	COI0	38600	NOTEST	0	0	0	0	1	1	no
AT1G06297.1	1:10489781-10490022	COI0	38600	NOTEST	0	0	0	0	1	1	no
AT1G06307.1	1:10590655-10590900	COI0	38600	NOTEST	0	0	0	0	1	1	no
AT1G06310.1	1:1926651-1930397	COI0	38600	NOTEST	0.125214	0.110223	-0.18397	0	1	1	no
AT1G06313.1	1:10667623-10668129	COI0	38600	NOTEST	0	0	0	0	1	1	no
AT1G06317.1	1:10667623-10668129	COI0	38600	NOTEST	0	0	0	0	1	1	no
AT1G06320.1	1:1930522-1932429	COI0	38600	NOTEST	0.39366	0	#NAME?	0	1	1	no
AT1G06323.1	1:10677328-10677671	COI0	38600	NOTEST	0	0	0	0	1	1	no
AT1G06327.1	1:10775822-10776319	COI0	38600	NOTEST	0	0	0	0	1	1	no
AT1G06330.1	1:1930522-1932429	COI0	38600	NOTEST	0.0840336	0.105531	0.328634	0	1	1	no
AT1G06333.1	1:10775822-10776319	COI0	38600	NOTEST	0	0	0	0	1	1	no
AT1G06340.1	1:1933283-1934103	COI0	38600	NOTEST	0.919543	0.270379	-1.76593	0	1	1	no
AT1G06343.1	1:10803627-10803853	COI0	38600	NOTEST	0	0	0	0	1	1	no
AT1G06347.1	1:10814089-10814376	COI0	38600	NOTEST	0	0	0	0	1	1	no
AT1G06350.1	1:1935226-1936841	COI0	38600	OK	35.351	17.8669	-0.984461	-3.98365	0.0028	0.176502	no
AT1G06353.1	1:10921834-10922072	COI0	38600	NOTEST	0	0	0	0	1	1	no
AT1G06357.1	1:10928004-10928968	COI0	38600	NOTEST	0	0	0	0	1	1	no
AT1G06360.2	1:1938861-1940496	COI0	38600	OK	16.5955	18.3743	0.146897	0.413069	0.6736	0.998514	no
AT1G06363.1	1:10928004-10928968	COI0	38600	NOTEST	0	0	0	0	1	1	no
AT1G06373.1	1:10954287-10954711	COI0	38600	NOTEST	0	0	0	0	1	1	no
AT1G06377.1	1:10981461-10981784	COI0	38600	NOTEST	0	0	0	0	1	1	no
AT1G06380.1	1:1944992-1946303	COI0	38600	OK	16.2963	15.8595	-0.0391981	-0.158048	0.9142	0.998514	no
AT1G06383.1	1:11013510-11013942	COI0	38600	NOTEST	0	0	0	0	1	1	no
AT1G06387.1	1:11016491-11016886	COI0	38600	NOTEST	0	0	0	0	1	1	no
AT1G06390.1	1:1946745-1952880	COI0	38600	OK	77.4926	87.7732	0.179723	0.618528	0.6265	0.998514	no
AT1G06393.1	1:11032357-11032898	COI0	38600	NOTEST	0	0	0	0	1	1	no
AT1G06400.1	1:1946745-1952880	COI0	38600	OK	69.56	65.8049	-0.0800628	-0.184785	0.84625	0.998514	no
AT1G06403.1	1:11061424-11061700	COI0	38600	NOTEST	0	0	0	0	1	1	no
AT1G06407.1	1:11102313-11103644	COI0	38600	NOTEST	0.236611	0	#NAME?	0	1	1	no
AT1G06410.1	1:1954673-1960027	COI0	38600	OK	59.3428	65.7315	0.147512	0.543857	0.62755	0.998514	no
AT1G06413.1	1:11136186-11136397	COI0	38600	NOTEST	0	0	0	0	1	1	no
AT1G06417.1	1:11139771-11140052	COI0	38600	NOTEST	0	0	0	0	1	1	no
AT1G06423.1	1:11144771-11147547	COI0	38600	OK	4.39128	4.22987	-0.0540288	-0.00824824	0.4582	0.998514	no
AT1G06427.1	1:11169449-11170396	COI0	38600	NOTEST	0	0	0	0	1	1	no
AT1G06430.1	1:1960030-1963189	COI0	38600	OK	155.125	235.129	0.600021	1.83479	0.0614	0.843637	no
AT1G06433.1	1:11197611-11198128	COI0	38600	NOTEST	0	0	0	0	1	1	no
AT1G06437.1	1:11241228-11241474	COI0	38600	NOTEST	0	0	0	0	1	1	no
AT1G06440.1	1:1963300-1965209	COI0	38600	OK	1.96792	1.96463	-0.00241987	-0.00519126	0.9773	0.998514	no
AT1G06443.1	1:11300617-11301038	COI0	38600	NOTEST	0	0	0	0	1	1	no
AT1G06447.1	1:11300617-11301038	COI0	38600	NOTEST	0	0	0	0	1	1	no
AT1G06450.1	1:1965839-1969656	COI0	38600	OK	1.85591	1.01499	-0.870666	-0.70321	0.60935	0.998514	no
AT1G06460.1	1:1965839-1969656	COI0	38600	OK	38.7567	28.6941	-0.433693	-1.48645	0.1503	0.998514	no
AT1G06470.1	1:1969657-1974526	COI0	38600	OK	13.5368	11.181	-0.275845	-1.1516	0.3793	0.998514	no
AT1G06473.1	1:11471860-11472650	COI0	38600	OK	4.77222	6.2327	0.385198	0.79644	0.4847	0.998514	no
AT1G06475.1	1:1969657-1974526	COI0	38600	OK	1.14574	1.91597	0.741797	0.324493	0.75265	0.998514	no
AT1G06480.1	1:1978083-1978157	COI0	38600	NOTEST	0	0	0	0	1	1	no
AT1G06483.1	1:11473108-11473354	COI0	38600	NOTEST	0	0	0	0	1	1	no
AT1G06490.1	1:1978377-1989409	COI0	38600	OK	2.05132	2.16888	0.0803975	0.212475	0.8244	0.998514	no
AT1G06493.1	1:11495822-11496107	COI0	38600	NOTEST	0	0	0	0	1	1	no
AT1G06497.1	1:11497401-11497896	COI0	38600	NOTEST	0	0	0	0	1	1	no
AT1G06500.1	1:1989478-1992228	COI0	38600	OK	27.8912	29.3036	0.0712684	0.201548	0.86465	0.998514	no
AT1G06507.1	1:11498281-11498711	COI0	38600	NOTEST	0	0	0	0	1	1	no
AT1G06510.1	1:1992228-1993841	COI0	38600	OK	26.439	32.1812	0.28355	1.15094	0.3568	0.998514	no
AT1G06513.1	1:11498281-11498711	COI0	38600	NOTEST	0	0	0	0	1	1	no
AT1G06515.1	1:1989478-1992228	COI0	38600	OK	37.1602	37.862	0.026993	0.100017	0.9496	0.998514	no
AT1G06517.1	1:11499281-11499883	COI0	38600	NOTEST	0	0	0	0	1	1	no
AT1G06520.1	1:1993902-1996355	COI0	38600	OK	6.33272	4.48547	-0.497566	-1.58297	0.2234	0.998514	no
AT1G06527.1	1:11598338-11598718	COI0	38600	NOTEST	0	0	0	0	1	1	no
AT1G06530.1	1:2001381-2003446	COI0	38600	NOTEST	0	0	0	0	1	1	no
AT1G06533.1	1:11601120-11601334	COI0	38600	NOTEST	0	0	0	0	1	1	no
AT1G06537.1	1:11672236-11672483	COI0	38600	NOTEST	5.89975	0	#NAME?	0	1	1	no
AT1G06540.1	1:2001381-2003446	COI0	38600	OK	62.702	65.5895	0.0649533	0.231277	0.81845	0.998514	no
AT1G06543.1	1:11676924-11680839	COI0	38600	NOTEST	0	0	0	0	1	1	no
AT1G06547.1	1:11684909-11684994	COI0	38600	NOTEST	0	0	0	0	1	1	no
AT1G06550.1	1:2003626-2007212	COI0	38600	OK	64.2396	86.6491	0.431723	1.87722	0.1188	0.998514	no
AT1G06553.1	1:11685234-11685376	COI0	38600	NOTEST	0	0	0	0	1	1	no
AT1G06557.1	1:11686327-11686618	COI0	38600	NOTEST	0	0	0	0	1	1	no
AT1G06560.1	1:2007614-2013545	COI0	38600	OK	13.1085	17.1811	0.39032	0.604199	0.54805	0.998514	no
AT1G06567.1	1:11698404-11698857	COI0	38600	NOTEST	0	0.372469	inf	0	1	1	no
AT1G06570.1	1:2007614-2013545	COI0	38600	OK	77.7495	93.5807	0.267378	0.837844	0.39185	0.998514	no
AT1G06577.1	1:11778400-11778712	COI0	38600	OK	3.58784	4.27693	0.253461	0.861823	0.8548	0.998514	no
AT1G06580.1	1:2013995-2024749	COI0	38600	OK	7.19215	7.81993	0.120734	0.403153	0.72565	0.998514	no
AT1G06583.1	1:11779271-11779894	COI0	38600	NOTEST	0	0	0	0	1	1	no
AT1G06587.1	1:11779271-11779894	COI0	38600	OK	8.30581	9.57245	0.204768	0.167214	0.87615	0.998514	no
AT1G06603.1	1:11813291-11813591	COI0	38600	NOTEST	0	0	0	0	1	1	no
AT1G06607.1	1:11830680-11831444	COI0	38600	NOTEST	0	0	0	0	1	1	no
AT1G06610.1	1:2025355-2025428	COI0	38600	NOTEST	0	0	0	0	1	1	no
AT1G06613.1	1:11844659-11856943	COI0	38600	OK	1.02115	3.69259	1.85444	0.274179	0.47765	0.998514	no
AT1G06617.1	1:11873273-11873480	COI0	38600	NOTEST	0	0	0	0	1	1	no
AT1G06620.1	1:2025543-2027413	COI0	38600	OK	5.17004	4.61593	-0.163553	-0.38159	0.69295	0.998514	no
at1g06623	1:11901408-11901520	COI0	38600	NOTEST	0	0	0	0	1	1	no
AT1G06627.1	1:11927721-11928260	COI0	38600	NOTEST	0	0	0	0	1	1	no
AT1G06630.1	1:2027605-2031388	COI0	38600	OK	21.894	23.821	0.121693	0.386811	0.69	0.998514	no
AT1G06633.1	1:11927721-11928260	COI0	38600	NOTEST	0	0	0	0	1	1	no
AT1G06637.1	1:11937182-11944982	COI0	38600	NOTEST	0	0	0	0	1	1	no
AT1G06640.1	1:2031625-2052170	COI0	38600	OK	73.9083	93.5226	0.339578	0.1873	0.88395	0.998514	no
at1g06643	1:12010878-12012547	COI0	38600	NOTEST	0	0	0	0	1	1	no
at1g06647	1:12023224-12024783	COI0	38600	NOTEST	0	0	0	0	1	1	no
at1g06653	1:12035046-12035135	COI0	38600	NOTEST	0	0	0	0	1	1	no
AT1G06657.1	1:12037163-12037653	COI0	38600	NOTEST	0	0	0	0	1	1	no
AT1G06660.1	1:2031625-2052170	COI0	38600	OK	1.82368	1.87736	0.0418516	0.003051	0.31945	0.998514	no
AT1G06663.1	1:12037163-12037653	COI0	38600	NOTEST	0	0	0	0	1	1	no
AT1G06667.1	1:12083968-12084054	COI0	38600	NOTEST	0	0	0	0	1	1	no
AT1G06670.1	1:2031625-2052170	COI0	38600	OK	1234.09	1660.08	0.427811	0.736987	0.4486	0.998514	no
AT1G06673.1	1:12097189-12097275	COI0	38600	NOTEST	0	0	0	0	1	1	no
AT1G06677.1	1:12180482-12184528	COI0	38600	NOTEST	0	0	0	0	1	1	no
AT1G06687.1	1:12199358-12199789	COI0	38600	NOTEST	1.79677	0.757563	-1.24597	0	1	1	no
AT1G06690.1	1:2031625-2052170	COI0	38600	OK	20.8503	44.3784	1.08979	0.278115	0.8221	0.998514	no
AT1G06693.1	1:12200426-12200747	COI0	38600	NOTEST	0	0	0	0	1	1	no
AT1G06697.1	1:12217891-12218338	COI0	38600	NOTEST	0	0	0	0	1	1	no
AT1G06700.1	1:2052369-2055548	COI0	38600	OK	60.5422	52.3834	-0.208831	-0.74663	0.44465	0.998514	no
AT1G06703.1	1:12232826-12233266	COI0	38600	NOTEST	0	0	0	0	1	1	no
AT1G06707.1	1:12232826-12233266	COI0	38600	NOTEST	0	0	0	0	1	1	no
AT1G06710.1	1:2055744-2067483	COI0	38600	OK	22.4133	28.5738	0.350338	1.21225	0.2151	0.998514	no
AT1G06713.1	1:12297237-12297525	COI0	38600	NOTEST	0	0	0	0	1	1	no
AT1G06717.1	1:12355556-12358966	COI0	38600	OK	0.682864	1.0087	0.56283	0.0382888	0.13985	0.998514	no
AT1G06723.1	1:12361352-12361763	COI0	38600	NOTEST	0	0	0	0	1	1	no
AT1G06727.1	1:12381196-12381406	COI0	38600	NOTEST	0	0	0	0	1	1	no
AT1G06730.1	1:2067508-2070455	COI0	38600	OK	8.76244	10.8058	0.302405	0.925378	0.36945	0.998514	no
AT1G06733.1	1:12381939-12382144	COI0	38600	NOTEST	0	0	0	0	1	1	no
AT1G06737.1	1:12383776-12384244	COI0	38600	NOTEST	0	0.828058	inf	0	1	1	no
AT1G06740.1	1:2070736-2077767	COI0	38600	OK	72.9268	38.9716	-0.904026	-1.1952	0.23375	0.998514	no
AT1G06743.1	1:12384321-12385041	COI0	38600	NOTEST	0	0	0	0	1	1	no
AT1G06747.1	1:12512324-12512684	COI0	38600	NOTEST	0	0	0	0	1	1	no
AT1G06753.1	1:12550338-12552629	COI0	38600	OK	2.18685	1.40476	-0.638533	-0.1452	0.7117	0.998514	no
AT1G06757.1	1:12595109-12602379	COI0	38600	NOTEST	0	0	0	0	1	1	no
AT1G06760.1	1:2070736-2077767	COI0	38600	OK	77.86	67.234	-0.211691	-0.794644	0.4877	0.998514	no
AT1G06770.1	1:2078879-2082097	COI0	38600	OK	9.57577	8.84635	-0.114306	-0.330635	0.7314	0.998514	no
AT1G06773.1	1:12602897-12603141	COI0	38600	NOTEST	0	0	0	0	1	1	no
AT1G06777.1	1:12643647-12643997	COI0	38600	NOTEST	0	0	0	0	1	1	no
AT1G06780.1	1:2083310-2091686	COI0	38600	OK	29.528	33.6503	0.188536	0.731572	0.5709	0.998514	no
AT1G06783.1	1:12643647-12643997	COI0	38600	NOTEST	0	0	0	0	1	1	no
AT1G06787.1	1:12685175-12688543	COI0	38600	OK	8.2527	8.57609	0.0554541	0.108564	0.9294	0.998514	no
AT1G06797.1	1:12767250-12767754	COI0	38600	NOTEST	0	0	0	0	1	1	no
AT1G06800.1	1:2083310-2091686	COI0	38600	OK	2.45948	2.30624	-0.0928123	-0.116397	0.90685	0.998514	no
AT1G06810.1	1:2091737-2092539	COI0	38600	NOTEST	0	0	0	0	1	1	no
AT1G06817.1	1:12887308-12887969	COI0	38600	NOTEST	0	0	0	0	1	1	no
AT1G06820.1	1:2092945-2096784	COI0	38600	OK	24.9679	33.081	0.405926	1.44508	0.1432	0.998514	no
AT1G06823.1	1:12887308-12887969	COI0	38600	NOTEST	0	0	0	0	1	1	no
AT1G06827.1	1:12907869-12908342	COI0	38600	NOTEST	0	0	0	0	1	1	no
AT1G06830.1	1:2097105-2097655	COI0	38600	OK	18.8427	9.72451	-0.95431	-3.44203	0.09885	0.975349	no
AT1G06837.1	1:12923004-12923585	COI0	38600	OK	2.00544	2.46839	0.299648	0.646466	0.7799	0.998514	no
AT1G06840.1	1:2097746-2103507	COI0	38600	OK	16.0184	11.9429	-0.423576	-1.66058	0.14785	0.998514	no
AT1G06850.1	1:2105047-2106749	COI0	38600	OK	9.63126	10.2791	0.0939162	0.242559	0.80395	0.998514	no
AT1G06853.1	1:12939070-12939354	COI0	38600	NOTEST	0	0	0	0	1	1	no
AT1G06857.1	1:12972057-12972468	COI0	38600	NOTEST	0	0	0	0	1	1	no
AT1G06860.1	1:2107397-2107468	COI0	38600	NOTEST	0	0	0	0	1	1	no
AT1G06863.1	1:12972057-12972468	COI0	38600	NOTEST	0	0	0	0	1	1	no
AT1G06867.1	1:12986719-12987066	COI0	38600	NOTEST	0	0	0	0	1	1	no
AT1G06870.1	1:2108511-2110986	COI0	38600	OK	14.9323	14.3561	-0.056768	-0.202402	0.8556	0.998514	no
AT1G06873.1	1:12986719-12987066	COI0	38600	NOTEST	0	0	0	0	1	1	no
AT1G06877.1	1:12987189-12987313	COI0	38600	NOTEST	0	0	0	0	1	1	no
AT1G06880.1	1:2111147-2111218	COI0	38600	NOTEST	0	0	0	0	1	1	no
AT1G06883.1	1:12995686-12996713	COI0	38600	NOTEST	0.0850456	0	#NAME?	0	1	1	no
AT1G06890.1	1:2111322-2114686	COI0	38600	OK	39.1931	39.7872	0.0217024	0.0768061	0.9351	0.998514	no
AT1G06897.1	1:13042972-13043377	COI0	38600	NOTEST	0	0	0	0	1	1	no
AT1G06900.1	1:2114764-2120745	COI0	38600	OK	21.2224	24.0051	0.177756	0.733574	0.52265	0.998514	no
at1g06903	1:13050666-13050864	COI0	38600	NOTEST	0	0	0	0	1	1	no
AT1G06907.1	1:13107633-13108236	COI0	38600	NOTEST	0	0	0	0	1	1	no
AT1G06910.1	1:2120990-2123801	COI0	38600	OK	5.64596	6.72138	0.251539	0.738664	0.5567	0.998514	no
AT1G06913.1	1:13154300-13154647	COI0	38600	NOTEST	0	0	0	0	1	1	no
AT1G06917.1	1:13167732-13168082	COI0	38600	NOTEST	0	0	0	0	1	1	no
AT1G06920.1	1:2124675-2125902	COI0	38600	NOTEST	0.163484	0.181748	0.152788	0	1	1	no
AT1G06923.1	1:2126669-2128611	COI0	38600	NOTEST	0	0.123197	inf	0	1	1	no
AT1G06925.1	1:2126669-2128611	COI0	38600	NOTEST	0	0	0	0	1	1	no
AT1G06927.1	1:13250535-13250970	COI0	38600	NOTEST	0	0	0	0	1	1	no
AT1G06930.1	1:2128842-2129883	COI0	38600	NOTEST	0	0	0	0	1	1	no
AT1G06933.1	1:13314706-13314965	COI0	38600	NOTEST	0	0	0	0	1	1	no
AT1G06937.1	1:13320656-13322511	COI0	38600	NOTEST	0	0	0	0	1	1	no
AT1G06943.1	1:13434823-13435127	COI0	38600	NOTEST	0	0	0	0	1	1	no
AT1G06947.1	1:13470979-13471267	COI0	38600	NOTEST	0	0	0	0	1	1	no
AT1G06950.1	1:2130052-2135703	COI0	38600	OK	73.0928	107.216	0.552722	1.87078	0.07185	0.887215	no
AT1G06953.1	1:13470979-13471267	COI0	38600	NOTEST	0	0	0	0	1	1	no
AT1G06957.1	1:13477921-13478204	COI0	38600	NOTEST	0	0	0	0	1	1	no
AT1G06960.1	1:2135809-2140975	COI0	38600	OK	15.7096	13.9834	-0.167925	-0.612605	0.64	0.998514	no
AT1G06963.1	1:13501085-13502283	COI0	38600	NOTEST	0	0	0	0	1	1	no
AT1G06967.1	1:13635672-13636083	COI0	38600	NOTEST	0	0	0	0	1	1	no
AT1G06973.1	1:13657061-13657390	COI0	38600	NOTEST	0	0	0	0	1	1	no
AT1G06977.1	1:13700764-13703573	COI0	38600	OK	1.31648	1.29235	-0.0266822	-0.011216	0.94325	0.998514	no
AT1G06980.1	1:2142938-2143977	COI0	38600	OK	1.12772	1.09967	-0.036338	-0.0475509	0.95125	0.998514	no
AT1G06983.1	1:13838400-13839087	COI0	38600	NOTEST	0.384513	0	#NAME?	0	1	1	no
AT1G06987.1	1:13857780-13858128	COI0	38600	NOTEST	0.596141	0	#NAME?	0	1	1	no
AT1G06990.1	1:2148341-2150152	COI0	38600	OK	1.98721	1.64139	-0.275826	-0.43209	0.6776	0.998514	no
AT1G06993.1	1:13872213-13872516	COI0	38600	NOTEST	0	0	0	0	1	1	no
AT1G06997.1	1:13987860-13988496	COI0	38600	NOTEST	0	0	0	0	1	1	no
AT1G07000.1	1:2150157-2152541	COI0	38600	OK	7.8459	6.29507	-0.317717	-0.890768	0.3599	0.998514	no
AT1G07003.1	1:14041692-14042042	COI0	38600	NOTEST	0	0	0	0	1	1	no
AT1G07007.1	1:14113267-14113653	COI0	38600	NOTEST	0	0	0	0	1	1	no
AT1G07010.1	1:2152797-2156153	COI0	38600	OK	103.964	120.886	0.217566	0.796733	0.46135	0.998514	no
AT1G07013.1	1:14155105-14155969	COI0	38600	NOTEST	0	0	0	0	1	1	no
AT1G07017.1	1:14196020-14196685	COI0	38600	NOTEST	0	0	0	0	1	1	no
AT1G07020.1	1:2152797-2156153	COI0	38600	OK	13.7316	16.5558	0.269843	0.233312	0.81735	0.998514	no
AT1G07023.1	1:14283370-14283751	COI0	38600	NOTEST	0	0	0	0	1	1	no
AT1G07025.1	1:2157657-2158158	COI0	38600	NOTEST	0	0	0	0	1	1	no
AT1G07027.1	1:14285891-14286203	COI0	38600	NOTEST	0	0	0	0	1	1	no
AT1G07030.1	1:2158412-2160818	COI0	38600	OK	18.7775	16.7935	-0.161102	-0.555214	0.60755	0.998514	no
AT1G07040.1	1:2160918-2163387	COI0	38600	OK	24.087	18.0433	-0.416794	-1.74371	0.17255	0.998514	no
AT1G07050.1	1:2163574-2165261	COI0	38600	OK	1.42099	1.75743	0.306568	0.37913	0.70995	0.998514	no
at1g07051	1:2165516-2165746	COI0	38600	NOTEST	0	0	0	0	1	1	no
AT1G07060.1	1:2166347-2168397	COI0	38600	NOTEST	0.154774	0.091679	-0.755498	0	1	1	no
AT1G07070.1	1:2168560-2172194	COI0	38600	OK	113.804	123.098	0.11326	0.426522	0.6838	0.998514	no
AT1G07090.1	1:2173951-2175038	COI0	38600	OK	11.1594	5.04644	-1.14493	-2.5739	0.0116	0.404598	no
AT1G07100.1	1:2177884-2177958	COI0	38600	NOTEST	0	0	0	0	1	1	no
AT1G07110.1	1:2178021-2184193	COI0	38600	OK	40.9131	55.7555	0.446552	1.91104	0.1107	0.998514	no
AT1G07117.1	1:15884799-15885225	COI0	38600	NOTEST	0	0	0	0	1	1	no
AT1G07120.1	1:2184317-2188734	COI0	38600	OK	1.26778	1.05667	-0.262769	-0.246607	0.82775	0.998514	no
AT1G07123.1	1:15942119-15942437	COI0	38600	NOTEST	0	0	0	0	1	1	no
AT1G07127.1	1:15943615-15943865	COI0	38600	NOTEST	0	0	0	0	1	1	no
AT1G07128.1	1:2184317-2188734	COI0	38600	NOTEST	0	0	0	0	1	1	no
AT1G07130.1	1:2184317-2188734	COI0	38600	OK	11.8603	10.1608	-0.223127	-0.556741	0.6092	0.998514	no
AT1G07133.1	1:15943876-15944259	COI0	38600	NOTEST	0	0	0	0	1	1	no
AT1G07135.1	1:2189876-2190784	COI0	38600	OK	8.34721	14.6681	0.813315	1.98249	0.0427	0.740939	no
at1g07137	1:16116571-16117041	COI0	38600	NOTEST	0	0	0	0	1	1	no
AT1G07140.1	1:2191678-2193836	COI0	38600	OK	139.59	160.84	0.204437	0.898449	0.47775	0.998514	no
AT1G07143.1	1:16131686-16132318	COI0	38600	NOTEST	0.190919	0	#NAME?	0	1	1	no
AT1G07147.1	1:16232414-16232773	COI0	38600	NOTEST	0	0	0	0	1	1	no
AT1G07150.1	1:2193940-2195996	COI0	38600	OK	4.45811	5.58329	0.324682	0.804041	0.4195	0.998514	no
AT1G07157.1	1:16401078-16401324	COI0	38600	NOTEST	0	0	0	0	1	1	no
AT1G07160.1	1:2197853-2199773	COI0	38600	NOTEST	0.295349	0.349013	0.24086	0	1	1	no
AT1G07163.1	1:16408888-16409127	COI0	38600	NOTEST	0	0	0	0	1	1	no
AT1G07170.1	1:2199996-2201272	COI0	38600	OK	31.317	27.8593	-0.168789	-0.478421	0.62665	0.998514	no
AT1G07173.1	1:16415356-16417928	COI0	38600	NOTEST	0	0	0	0	1	1	no
AT1G07175.1	1:2202277-2203366	COI0	38600	NOTEST	0	0	0	0	1	1	no
AT1G07177.1	1:16424305-16424564	COI0	38600	NOTEST	0	0	0	0	1	1	no
AT1G07180.1	1:2204103-2207099	COI0	38600	OK	68.8086	92.5039	0.426924	1.8252	0.1366	0.998514	no
AT1G07183.1	1:16466013-16466321	COI0	38600	NOTEST	0	0	0	0	1	1	no
AT1G07187.1	1:16471281-16471983	COI0	38600	OK	2.16826	3.47067	0.678676	1.22192	0.38655	0.998514	no
AT1G07190.1	1:2208012-2208177	COI0	38600	NOTEST	0	0	0	0	1	1	no
AT1G07193.1	1:16474042-16474313	COI0	38600	NOTEST	0	0	0	0	1	1	no
AT1G07197.1	1:16560776-16560998	COI0	38600	NOTEST	0	0	0	0	1	1	no
AT1G07200.1	1:2208476-2212718	COI0	38600	OK	19.7445	28.6378	0.536469	1.87401	0.05505	0.816242	no
AT1G07210.1	1:2215215-2219649	COI0	38600	OK	43.8992	44.813	0.0297242	0.0925654	0.9285	0.998514	no
AT1G07220.1	1:2215215-2219649	COI0	38600	OK	10.3212	10.0934	-0.032187	-0.0597867	0.9494	0.998514	no
AT1G07230.1	1:2220180-2223018	COI0	38600	OK	28.7387	23.5646	-0.286374	-0.976196	0.3131	0.998514	no
AT1G07233.1	1:16645543-16646093	COI0	38600	NOTEST	0	0	0	0	1	1	no
AT1G07237.1	1:16755831-16756032	COI0	38600	NOTEST	0	0	0	0	1	1	no
AT1G07240.1	1:2223624-2225524	COI0	38600	OK	12.9897	7.60807	-0.771765	-2.26992	0.02405	0.580586	no
at1g07243	1:16764391-16767685	COI0	38600	NOTEST	0	0	0	0	1	1	no
AT1G07247.1	1:16811344-16811940	COI0	38600	NOTEST	0	0	0	0	1	1	no
AT1G07250.1	1:2225758-2229357	COI0	38600	OK	17.8863	20.2027	0.175691	0.604196	0.56995	0.998514	no
AT1G07253.1	1:16811344-16811940	COI0	38600	NOTEST	0	0	0	0	1	1	no
AT1G07257.1	1:16812745-16812944	COI0	38600	NOTEST	0	0	0	0	1	1	no
AT1G07260.1	1:2225758-2229357	COI0	38600	OK	2.14298	1.84875	-0.213063	-0.212882	0.8284	0.998514	no
AT1G07263.1	1:16817047-16817318	COI0	38600	NOTEST	0	0	0	0	1	1	no
AT1G07267.1	1:16817809-16818214	COI0	38600	NOTEST	0	0	0	0	1	1	no
AT1G07270.1	1:2229443-2233017	COI0	38600	OK	1.16392	1.02889	-0.177897	-0.231561	0.8146	0.998514	no
AT1G07273.1	1:16992569-16992951	COI0	38600	NOTEST	0	0	0	0	1	1	no
AT1G07277.1	1:16992569-16992951	COI0	38600	NOTEST	0	0	0	0	1	1	no
AT1G07280.1	1:2238016-2241471	COI0	38600	OK	16.6353	11.7836	-0.497469	-1.63067	0.09705	0.96846	no
at1g07283	1:16993890-16994045	COI0	38600	NOTEST	0	0	0	0	1	1	no
AT1G07287.1	1:17012775-17013059	COI0	38600	NOTEST	0	0	0	0	1	1	no
AT1G07290.1	1:2242011-2244992	COI0	38600	OK	1.05426	1.00407	-0.0703642	-0.118772	0.92695	0.998514	no
AT1G07293.1	1:17091838-17092082	COI0	38600	NOTEST	0	0	0	0	1	1	no
AT1G07297.1	1:17093277-17093560	COI0	38600	NOTEST	0	0	0	0	1	1	no
AT1G07300.1	1:2245692-2248961	COI0	38600	OK	34.1622	26.5694	-0.362635	-1.29797	0.2317	0.998514	no
AT1G07303.1	1:17095507-17095712	COI0	38600	NOTEST	0	0	0	0	1	1	no
AT1G07317.1	1:17278481-17278759	COI0	38600	NOTEST	0	0	0	0	1	1	no
AT1G07320.1	1:2248966-2250529	COI0	38600	OK	127.095	169.717	0.417222	1.4313	0.1485	0.998514	no
AT1G07323.1	1:17295587-17296007	COI0	38600	OK	33.1207	42.725	0.36735	1.78506	0.4051	0.998514	no
AT1G07327.1	1:17312832-17313395	COI0	38600	NOTEST	0	0	0	0	1	1	no
AT1G07330.1	1:2250919-2254036	COI0	38600	NOTEST	0.132138	0.0759636	-0.79866	0	1	1	no
AT1G07333.1	1:17313889-17314236	COI0	38600	NOTEST	0	0	0	0	1	1	no
AT1G07337.1	1:17314500-17315180	COI0	38600	NOTEST	0	0	0	0	1	1	no
AT1G07340.1	1:2254821-2256850	COI0	38600	OK	2.85609	0.866988	-1.71996	-3.11912	0.02665	0.603015	no
AT1G07343.1	1:17314500-17315180	COI0	38600	NOTEST	0	0	0	0	1	1	no
AT1G07347.1	1:17341892-17342151	COI0	38600	NOTEST	0	0	0	0	1	1	no
AT1G07350.1	1:2257383-2260187	COI0	38600	OK	118.226	97.5253	-0.277704	-0.939687	0.3344	0.998514	no
AT1G07353.1	1:17348022-17348579	COI0	38600	NOTEST	0	0	0	0	1	1	no
at1g07357	1:17386794-17387008	COI0	38600	NOTEST	0	0	0	0	1	1	no
AT1G07360.1	1:2260316-2262923	COI0	38600	OK	25.8102	25.0938	-0.0406103	-0.126167	0.8834	0.998514	no
AT1G07367.1	1:17388988-17389500	COI0	38600	NOTEST	0	0	0	0	1	1	no
AT1G07370.1	1:2263036-2264553	COI0	38600	OK	24.6697	19.2003	-0.361608	-1.23309	0.2651	0.998514	no
AT1G07373.1	1:17392373-17393026	COI0	38600	NOTEST	0.224133	0	#NAME?	0	1	1	no
AT1G07380.1	1:2264633-2269121	COI0	38600	OK	7.48213	8.81152	0.235943	0.7399	0.4487	0.998514	no
AT1G07383.1	1:17441717-17442062	COI0	38600	NOTEST	0	0	0	0	1	1	no
AT1G07390.2	1:2269621-2275783	COI0	38600	OK	31.074	26.5848	-0.225108	-0.721287	0.47555	0.998514	no
AT1G07393.1	1:17483904-17483957	COI0	38600	NOTEST	0	0	0	0	1	1	no
AT1G07397.1	1:17498908-17499296	COI0	38600	NOTEST	0	0	0	0	1	1	no
AT1G07407.1	1:17498908-17499296	COI0	38600	NOTEST	0	0	0	0	1	1	no
AT1G07410.1	1:2276029-2280502	COI0	38600	OK	20.6009	24.1993	0.232261	0.748453	0.4612	0.998514	no
AT1G07413.1	1:17580476-17580758	COI0	38600	NOTEST	0	0	0	0	1	1	no
AT1G07417.1	1:17588214-17588726	COI0	38600	NOTEST	0	0	0	0	1	1	no
AT1G07423.1	1:17588214-17588726	COI0	38600	NOTEST	0	0	0	0	1	1	no
AT1G07430.1	1:2280745-2282828	COI0	38600	OK	2.95804	4.37195	0.563632	1.24792	0.2132	0.998514	no
AT1G07433.1	1:17589273-17589513	COI0	38600	OK	7.423	0	#NAME?	#NAME?	0.00405	0.219565	no
AT1G07437.1	1:17589273-17589513	COI0	38600	NOTEST	0	0	0	0	1	1	no
AT1G07440.1	1:2286184-2287791	COI0	38600	OK	65.4702	72.0099	0.137355	0.456452	0.6376	0.998514	no
AT1G07447.1	1:17604717-17605176	COI0	38600	NOTEST	0	0	0	0	1	1	no
AT1G07450.1	1:2287925-2289336	COI0	38600	OK	2.29407	1.85925	-0.30319	-0.573767	0.6975	0.998514	no
AT1G07453.1	1:17670443-17670827	COI0	38600	NOTEST	0	0	0	0	1	1	no
AT1G07457.1	1:17695288-17696075	COI0	38600	NOTEST	0	0	0	0	1	1	no
AT1G07460.1	1:2289958-2291101	COI0	38600	NOTEST	0	0	0	0	1	1	no
AT1G07463.1	1:17695288-17696075	COI0	38600	NOTEST	0	0	0	0	1	1	no
AT1G07467.1	1:17762829-17763370	COI0	38600	NOTEST	0	0	0	0	1	1	no
AT1G07470.1	1:2291368-2294558	COI0	38600	OK	14.8673	18.1734	0.289682	0.909655	0.3537	0.998514	no
AT1G07473.1	1:2294565-2295489	COI0	38600	NOTEST	0	0	0	0	1	1	no
AT1G07476.1	1:2295552-2299544	COI0	38600	NOTEST	0	0	0	0	1	1	no
AT1G07477.1	1:17766737-17773518	COI0	38600	OK	21.4188	19.8294	-0.111238	-0.194813	0.89015	0.998514	no
AT1G07480.1	1:2295552-2299544	COI0	38600	OK	15.2166	13.7266	-0.148674	-0.454388	0.64985	0.998514	no
AT1G07483.1	1:17837967-17838579	COI0	38600	NOTEST	0	0	0	0	1	1	no
AT1G07485.1	1:2301374-2302121	COI0	38600	NOTEST	0.338745	0	#NAME?	0	1	1	no
AT1G07490.1	1:2301374-2302121	COI0	38600	OK	8.28756	9.16626	0.145386	0.251913	0.80165	0.998514	no
AT1G07493.1	1:17961497-17961772	COI0	38600	NOTEST	0	0	0	0	1	1	no
AT1G07497.1	1:17964761-17964989	COI0	38600	NOTEST	0	0	0	0	1	1	no
AT1G07500.1	1:2304434-2312399	COI0	38600	OK	6.95374	15.2363	1.13165	1.76906	0.69575	0.998514	no
AT1G07503.1	1:18031953-18032156	COI0	38600	NOTEST	0	0	0	0	1	1	no
AT1G07507.1	1:18079155-18079354	COI0	38600	NOTEST	0	0	0	0	1	1	no
AT1G07510.1	1:2304434-2312399	COI0	38600	OK	9.91392	9.87304	-0.00596135	-0.0191788	0.98475	0.998514	no
AT1G07513.1	1:18112452-18117833	COI0	38600	NOTEST	0	0	0	0	1	1	no
AT1G07517.1	1:18112452-18117833	COI0	38600	NOTEST	0	0.0948541	inf	0	1	1	no
AT1G07520.2	1:2304434-2312399	COI0	38600	OK	6.42913	9.11015	0.50285	0.85471	0.3826	0.998514	no
AT1G07523.1	1:18127989-18128287	COI0	38600	NOTEST	0	0	0	0	1	1	no
AT1G07530.1	1:2313580-2316507	COI0	38600	OK	33.7133	40.9525	0.280632	1.23834	0.3126	0.998514	no
AT1G07533.1	1:18190469-18190733	COI0	38600	NOTEST	0	0	0	0	1	1	no
AT1G07537.1	1:18220532-18224325	COI0	38600	NOTEST	0	0	0	0	1	1	no
AT1G07540.1	1:2318142-2321961	COI0	38600	NOTEST	0.421526	0.0351362	-3.58459	0	1	1	no
AT1G07543.1	1:18264943-18269465	COI0	38600	NOTEST	0	0	0	0	1	1	no
AT1G07547.1	1:18264943-18269465	COI0	38600	OK	0.432567	1.04973	1.27902	0.341927	0.6206	0.998514	no
AT1G07550.1	1:2322542-2326570	COI0	38600	NOTEST	0.209874	0.411659	0.971927	0	1	1	no
AT1G07553.1	1:18272728-18273115	COI0	38600	NOTEST	0	0	0	0	1	1	no
AT1G07557.1	1:18272728-18273115	COI0	38600	NOTEST	0	0	0	0	1	1	no
AT1G07560.1	1:2327314-2333767	COI0	38600	NOTEST	0.601417	0.516781	-0.218811	0	1	1	no
AT1G07563.1	1:18332428-18337520	COI0	38600	OK	3.77488	5.84576	0.630961	0.826347	0.79825	0.998514	no
AT1G07567.1	1:18332428-18337520	COI0	38600	OK	19.547	17.745	-0.139534	-0.07583	0.93785	0.998514	no
AT1G07570.1	1:2327314-2333767	COI0	38600	OK	35.9406	31.0334	-0.211792	-0.722367	0.46135	0.998514	no
AT1G07573.1	1:18363685-18363933	COI0	38600	NOTEST	0	0	0	0	1	1	no
AT1G07580.1	1:2334821-2334894	COI0	38600	NOTEST	0	0	0	0	1	1	no
AT1G07583.1	1:18398886-18399127	COI0	38600	NOTEST	0	0	0	0	1	1	no
AT1G07587.1	1:18400002-18405681	COI0	38600	NOTEST	0	0.243379	inf	0	1	1	no
AT1G07590.1	1:2336476-2339391	COI0	38600	OK	491.942	439.248	-0.163452	-0.1672	0.671	0.998514	no
AT1G07593.1	1:18428008-18428096	COI0	38600	NOTEST	0	0	0	0	1	1	no
AT1G07597.1	1:18434870-18435182	COI0	38600	NOTEST	0	0	0	0	1	1	no
AT1G07603.1	1:18517585-18521781	COI0	38600	NOTEST	0.968333	0.228691	-2.0821	0	1	1	no
AT1G07610.1	1:2341446-2342148	COI0	38600	OK	136.086	138.049	0.0206594	0.146793	0.9426	0.998514	no
at1g07613	1:18549203-18550042	COI0	38600	NOTEST	0	0	0	0	1	1	no
AT1G07615.1	1:2342197-2344314	COI0	38600	OK	8.60485	8.69889	0.0156811	0.0441435	0.96565	0.998514	no
AT1G07617.1	1:18634832-18635371	COI0	38600	NOTEST	0	0	0	0	1	1	no
AT1G07620.1	1:2344389-2346889	COI0	38600	OK	8.776	4.44334	-0.981918	-2.47871	0.0137	0.44383	no
AT1G07623.1	1:18640822-18641311	COI0	38600	NOTEST	0	0	0	0	1	1	no
AT1G07627.1	1:18641823-18642377	COI0	38600	NOTEST	0	0	0	0	1	1	no
AT1G07630.1	1:2348914-2351799	COI0	38600	OK	14.4377	9.40948	-0.61765	-2.12579	0.0466	0.766803	no
AT1G07637.1	1:18685768-18690503	COI0	38600	NOTEST	0	0	0	0	1	1	no
AT1G07640.1	1:2353030-2356413	COI0	38600	OK	42.8555	32.7684	-0.387176	-1.37999	0.1597	0.998514	no
AT1G07645.1	1:2367436-2368436	COI0	38600	OK	1.27602	0	#NAME?	#NAME?	0.0006	0.061758	no
AT1G07647.1	1:18724189-18728369	COI0	38600	OK	15.9706	0	#NAME?	#NAME?	0.21175	0.998514	no
AT1G07650.1	1:2359110-2366736	COI0	38600	OK	26.4374	23.8922	-0.146043	-0.519798	0.5905	0.998514	no
AT1G07653.1	1:18724189-18728369	COI0	38600	NOTEST	0	0	0	0	1	1	no
AT1G07657.1	1:18755729-18756041	COI0	38600	NOTEST	0	0	0	0	1	1	no
AT1G07660.1	1:2368832-2369735	COI0	38600	OK	43.6674	48.4622	0.150304	0.468569	0.6329	0.998514	no
AT1G07663.1	1:18770936-18774759	COI0	38600	NOTEST	0	0	0	0	1	1	no
AT1G07667.1	1:18781763-18787802	COI0	38600	OK	3.39289	4.26223	0.329093	0.446188	0.76155	0.998514	no
AT1G07670.1	1:2370019-2374607	COI0	38600	OK	26.9044	27.1201	0.0115247	0.0408188	0.965	0.998514	no
AT1G07673.1	1:18794133-18794585	COI0	38600	NOTEST	0	0	0	0	1	1	no
AT1G07680.1	1:2376011-2377186	COI0	38600	NOTEST	0	0	0	0	1	1	no
AT1G07683.1	1:18813669-18814351	COI0	38600	NOTEST	0	0	0	0	1	1	no
AT1G07690.1	1:2377975-2379207	COI0	38600	NOTEST	0	0	0	0	1	1	no
AT1G07697.1	1:18866196-18869933	COI0	38600	OK	0	2.44773	inf	#NAME?	0.2423	0.998514	no
AT1G07700.1	1:2379594-2381390	COI0	38600	OK	82.3628	78.7263	-0.065148	-0.230266	0.81745	0.998514	no
AT1G07702.1	1:2381554-2386157	COI0	38600	NOTEST	0	0	0	0	1	1	no
AT1G07703.1	1:18876809-18880012	COI0	38600	NOTEST	0	0	0	0	1	1	no
AT1G07705.1	1:2381554-2386157	COI0	38600	OK	14.7104	16.6516	0.178818	0.599515	0.5388	0.998514	no
AT1G07707.1	1:18880111-18884809	COI0	38600	NOTEST	0	0	0	0	1	1	no
AT1G07710.1	1:2386163-2388350	COI0	38600	NOTEST	0.5514	0.303713	-0.860393	0	1	1	no
AT1G07717.1	1:18956275-18956542	COI0	38600	NOTEST	0	0	0	0	1	1	no
AT1G07720.2	1:2390530-2392628	COI0	38600	OK	33.8395	52.6433	0.63754	2.26482	0.02	0.533781	no
AT1G07723.1	1:18956706-18956925	COI0	38600	NOTEST	0	0	0	0	1	1	no
AT1G07725.1	1:2394800-2397399	COI0	38600	NOTEST	0	0	0	0	1	1	no
at1g07727	1:19026914-19027000	COI0	38600	NOTEST	0	0	0	0	1	1	no
AT1G07728.1	1:2394800-2397399	COI0	38600	OK	8.50282	8.68995	0.0314077	0.0945355	0.9206	0.998514	no
AT1G07730.2	1:2397441-2400508	COI0	38600	OK	1.78225	2.02668	0.185421	0.35628	0.71595	0.998514	no
AT1G07733.1	1:19050297-19053731	COI0	38600	OK	4.57021	12.9139	1.4986	1.78501	0.4048	0.998514	no
AT1G07743.1	1:19050297-19053731	COI0	38600	OK	2.06406	3.99123	0.951349	0.310855	0.7616	0.998514	no
AT1G07745.1	1:2400588-2402942	COI0	38600	OK	8.31822	6.44938	-0.367115	-0.862418	0.3799	0.998514	no
AT1G07747.1	1:2403557-2403845	COI0	38600	NOTEST	0	0	0	0	1	1	no
AT1G07750.1	1:2403991-2406049	COI0	38600	OK	31.4152	20.9777	-0.582604	-2.29318	0.0522	0.798889	no
AT1G07753.1	1:19115556-19119382	COI0	38600	OK	7.5721	5.73501	-0.400898	-0.459088	0.64375	0.998514	no
AT1G07757.1	1:19125582-19135630	COI0	38600	NOTEST	0	0	0	0	1	1	no
AT1G07760.1	1:2406833-2406905	COI0	38600	NOTEST	0	0	0	0	1	1	no
AT1G07763.1	1:19171731-19171968	COI0	38600	NOTEST	0	0	0	0	1	1	no
AT1G07767.1	1:19232478-19232748	COI0	38600	NOTEST	0	0	0	0	1	1	no
AT1G07770.1	1:2407410-2409791	COI0	38600	OK	471.971	433.333	-0.123223	-0.386876	0.6906	0.998514	no
AT1G07773.1	1:19303124-19303441	COI0	38600	NOTEST	0	0	0	0	1	1	no
AT1G07777.1	1:19354521-19354861	COI0	38600	NOTEST	0	0	0	0	1	1	no
AT1G07780.1	1:2409864-2412777	COI0	38600	OK	12.848	17.3238	0.431215	1.23124	0.20725	0.998514	no
AT1G07783.1	1:19373686-19374402	COI0	38600	NOTEST	0	0	0	0	1	1	no
AT1G07787.1	1:19428078-19428380	COI0	38600	NOTEST	0	0	0	0	1	1	no
AT1G07790.1	1:2412937-2413790	COI0	38600	OK	63.4414	78.7044	0.311019	1.22137	0.26855	0.998514	no
AT1G07793.1	1:19430504-19431010	COI0	38600	NOTEST	0	0	0	0	1	1	no
AT1G07795.1	1:2414142-2414967	COI0	38600	NOTEST	0.457666	0.26645	-0.780431	0	1	1	no
AT1G07803.1	1:19488754-19491650	COI0	38600	OK	22.9851	14.377	-0.676931	-0.629674	0.5244	0.998514	no
AT1G07807.1	1:19559879-19565272	COI0	38600	NOTEST	0	0	0	0	1	1	no
AT1G07810.1	1:2416177-2420829	COI0	38600	OK	21.8109	23.3792	0.100178	0.397858	0.7109	0.998514	no
AT1G07813.1	1:19568587-19572204	COI0	38600	NOTEST	0.889791	0	#NAME?	0	1	1	no
AT1G07820.1	1:2421088-2422066	COI0	38600	OK	111.197	121.98	0.133529	0.471847	0.61955	0.998514	no
AT1G07827.1	1:19596398-19596476	COI0	38600	NOTEST	0	0	0	0	1	1	no
AT1G07830.1	1:2422125-2423803	COI0	38600	OK	25.315	18.5962	-0.444989	-1.84418	0.19985	0.998514	no
AT1G07833.1	1:19600226-19600467	COI0	38600	NOTEST	0	0	0	0	1	1	no
AT1G07837.1	1:19612686-19612959	COI0	38600	NOTEST	0	0	0	0	1	1	no
AT1G07840.1	1:2424044-2432091	COI0	38600	OK	30.0809	34.2366	0.186691	0.513739	0.57645	0.998514	no
AT1G07843.1	1:19699158-19699526	COI0	38600	NOTEST	0	0	0	0	1	1	no
AT1G07847.1	1:19708010-19711081	COI0	38600	NOTEST	6.59432	15.5515	1.23776	0	1	1	no
AT1G07853.1	1:19783184-19789150	COI0	38600	OK	0.910009	1.46073	0.682737	0.0814	0.31515	0.998514	no
AT1G07857.1	1:19796559-19796897	COI0	38600	NOTEST	0	0	0	0	1	1	no
AT1G07860.1	1:2424044-2432091	COI0	38600	OK	12.7179	14.0858	0.147381	0.289725	0.76595	0.998514	no
AT1G07863.1	1:19796559-19796897	COI0	38600	NOTEST	0	0	0	0	1	1	no
at1g07867	1:19806262-19807705	COI0	38600	OK	5.82953	14.4261	1.30723	0.237299	0.4687	0.998514	no
AT1G07873.1	1:19820004-19820432	COI0	38600	NOTEST	0	0	0	0	1	1	no
AT1G07877.1	1:19924659-19931494	COI0	38600	NOTEST	0	0	0	0	1	1	no
AT1G07880.1	1:2433895-2436861	COI0	38600	OK	4.86962	5.97119	0.294209	0.558461	0.6167	0.998514	no
AT1G07883.1	1:19958379-19961827	COI0	38600	NOTEST	0	0	0	0	1	1	no
AT1G07890.1	1:2437280-2439665	COI0	38600	OK	712.234	1193.94	0.745304	1.83404	0.0627	0.849017	no
AT1G07893.1	1:19963046-19969757	COI0	38600	OK	44.8448	42.2282	-0.0867365	-0.245352	0.8025	0.998514	no
AT1G07897.1	1:19981384-19981565	COI0	38600	OK	52.11	0	#NAME?	#NAME?	0.0051	0.252963	no
AT1G07900.1	1:2442569-2443746	COI0	38600	OK	1.83055	3.35008	0.87192	1.66632	0.3111	0.998514	no
AT1G07901.1	1:2443917-2445140	COI0	38600	NOTEST	0	0	0	0	1	1	no
AT1G07902.1	1:2443917-2445140	COI0	38600	OK	1.29041	0.346236	-1.898	-0.927249	0.24905	0.998514	no
AT1G07907.1	1:19982613-19982926	COI0	38600	NOTEST	0	0	0	0	1	1	no
AT1G07910.1	1:2445436-2454645	COI0	38600	OK	6.74567	6.44368	-0.066077	-0.212932	0.8216	0.998514	no
AT1G07913.1	1:20007959-20008159	COI0	38600	NOTEST	0	0	0	0	1	1	no
AT1G07917.1	1:20010404-20011084	COI0	38600	NOTEST	0	0	0	0	1	1	no
AT1G07920.1	1:2454770-2457321	COI0	38600	OK	180.416	175.192	-0.0423926	-0.134482	0.88785	0.998514	no
AT1G07923.1	1:20018633-20019086	COI0	38600	NOTEST	0	0	0	0	1	1	no
AT1G07927.1	1:20018633-20019086	COI0	38600	NOTEST	0	0	0	0	1	1	no
AT1G07930.1	1:2458183-2460817	COI0	38600	OK	287.792	316.826	0.138662	0.404392	0.6796	0.998514	no
AT1G07937.1	1:20093469-20093717	COI0	38600	NOTEST	0	0	0	0	1	1	no
AT1G07940.1	1:2462948-2465545	COI0	38600	OK	152.709	157.2	0.0418129	0.137004	0.886	0.998514	no
AT1G07943.1	1:20215394-20219452	COI0	38600	OK	1.74439	1.79687	0.0427597	0.0130613	0.8239	0.998514	no
AT1G07947.1	1:20226799-20227155	COI0	38600	NOTEST	0	0	0	0	1	1	no
AT1G07950.2	1:2465728-2472806	COI0	38600	OK	20.0377	16.4534	-0.284335	-0.55718	0.69205	0.998514	no
AT1G07957.1	1:20259546-20262266	COI0	38600	NOTEST	0	0	0	0	1	1	no
AT1G07960.1	1:2465728-2472806	COI0	38600	OK	64.9999	60.6267	-0.100484	-0.41919	0.79165	0.998514	no
AT1G07963.1	1:20273566-20277981	COI0	38600	NOTEST	0	0	0	0	1	1	no
AT1G07967.1	1:20290555-20297236	COI0	38600	NOTEST	0	0	0	0	1	1	no
AT1G07970.1	1:2465728-2472806	COI0	38600	OK	8.38647	8.90211	0.0860837	0.176352	0.85605	0.998514	no
AT1G07973.1	1:20321399-20321957	COI0	38600	NOTEST	0	0	0	0	1	1	no
AT1G07977.1	1:20412148-20412497	COI0	38600	NOTEST	0	0	0	0	1	1	no
AT1G07980.1	1:2473164-2475128	COI0	38600	OK	17.8976	22.5555	0.333717	1.01219	0.30425	0.998514	no
AT1G07983.1	1:20413011-20415287	COI0	38600	OK	378.39	405.578	0.100104	0.174733	0.85785	0.998514	no
AT1G07985.1	1:2475225-2476167	COI0	38600	OK	1.56844	5.75665	1.8759	3.54377	0.0181	0.516807	no
AT1G07987.1	1:20416769-20421156	COI0	38600	OK	0.510666	0.71962	0.494855	0.0641216	0.342	0.998514	no
AT1G07990.1	1:2476952-2483196	COI0	38600	OK	25.8438	26.4719	0.0346423	0.123052	0.8996	0.998514	no
AT1G07993.1	1:20439382-20444066	COI0	38600	NOTEST	0	0	0	0	1	1	no
AT1G07997.1	1:20439382-20444066	COI0	38600	NOTEST	0	0	0	0	1	1	no
AT1G08000.1	1:2483239-2485726	COI0	38600	OK	6.41997	6.54027	0.0267816	0.0691648	0.94205	0.998514	no
AT1G08003.1	1:20451082-20454266	COI0	38600	OK	29.1839	36.7475	0.332474	2.14368	0.852	0.998514	no
AT1G08005.1	1:2483239-2485726	COI0	38600	NOTEST	0.31229	0	#NAME?	0	1	1	no
AT1G08010.1	1:2485847-2488085	COI0	38600	OK	16.8383	13.3519	-0.334708	-1.06602	0.276	0.998514	no
AT1G08013.1	1:20493113-20493595	COI0	38600	NOTEST	0	0	0	0	1	1	no
AT1G08017.1	1:20495105-20495793	COI0	38600	NOTEST	0	0	0	0	1	1	no
AT1G08027.1	1:20496760-20497288	COI0	38600	NOTEST	0	0	0	0	1	1	no
AT1G08030.1	1:2489408-2493327	COI0	38600	OK	17.7264	16.6341	-0.0917555	-0.297446	0.7591	0.998514	no
AT1G08033.1	1:20582296-20582564	COI0	38600	NOTEST	0	3.04625	inf	0	1	1	no
AT1G08035.1	1:2494401-2501581	COI0	38600	NOTEST	0.186905	0	#NAME?	0	1	1	no
AT1G08040.1	1:2494401-2501581	COI0	38600	OK	22.2439	23.7511	0.0945823	0.396216	0.7532	0.998514	no
AT1G08047.1	1:20617312-20620146	COI0	38600	NOTEST	0	0	0	0	1	1	no
at1g08053	1:20622537-20622719	COI0	38600	NOTEST	0	0	0	0	1	1	no
AT1G08057.1	1:20745121-20745419	COI0	38600	NOTEST	0	0	0	0	1	1	no
AT1G08060.1	1:2501703-2511084	COI0	38600	OK	7.19919	7.86159	0.126985	0.443005	0.65395	0.998514	no
AT1G08065.1	1:2511646-2513454	COI0	38600	NOTEST	0.237203	0.095091	-1.31874	0	1	1	no
AT1G08070.1	1:2514149-2516620	COI0	38600	OK	0.783999	1.78337	1.18568	1.79994	0.07405	0.895413	no
AT1G08073.1	1:20879899-20893268	COI0	38600	OK	12.6063	21.8993	0.796742	0.232069	0.833	0.998514	no
AT1G08077.1	1:20926164-20926446	COI0	38600	NOTEST	0	0	0	0	1	1	no
AT1G08080.1	1:2516990-2518611	COI0	38600	NOTEST	0.0940604	0.34879	1.8907	0	1	1	no
AT1G08087.1	1:20944135-20949281	COI0	38600	NOTEST	0	0.250519	inf	0	1	1	no
AT1G08090.1	1:2524022-2526322	COI0	38600	NOTEST	0	0	0	0	1	1	no
AT1G08093.1	1:21051657-21051960	COI0	38600	NOTEST	0	0	0	0	1	1	no
AT1G08097.1	1:21051657-21051960	COI0	38600	NOTEST	0	0	0	0	1	1	no
AT1G08100.1	1:2527169-2529120	COI0	38600	NOTEST	0	0	0	0	1	1	no
AT1G08103.1	1:21052298-21053178	COI0	38600	NOTEST	0	0	0	0	1	1	no
AT1G08110.1	1:2535250-2537932	COI0	38600	OK	142.445	172.299	0.274503	0.965901	0.3276	0.998514	no
AT1G08113.1	1:21052298-21053178	COI0	38600	NOTEST	0	0	0	0	1	1	no
AT1G08115.1	1:2538073-2538238	COI0	38600	OK	92.0828	55.921	-0.719541	-29.2773	0.6269	0.998514	no
AT1G08117.1	1:21052298-21053178	COI0	38600	NOTEST	0	0	0	0	1	1	no
AT1G08120.1	1:2538614-2542362	COI0	38600	NOTEST	0	0	0	0	1	1	no
AT1G08125.1	1:2538614-2542362	COI0	38600	OK	28.5584	28.2475	-0.0157917	-0.0511634	0.957	0.998514	no
AT1G08127.1	1:21060491-21060729	COI0	38600	NOTEST	0	0	0	0	1	1	no
AT1G08130.1	1:2542662-2547946	COI0	38600	OK	17.8878	19.9946	0.160631	0.608989	0.57215	0.998514	no
AT1G08133.1	1:21262038-21262657	COI0	38600	NOTEST	0	0	0	0	1	1	no
AT1G08135.1	1:2548495-2551544	COI0	38600	NOTEST	0.0316329	0	#NAME?	0	1	1	no
AT1G08137.1	1:21262038-21262657	COI0	38600	NOTEST	0	0	0	0	1	1	no
AT1G08140.1	1:2551934-2555229	COI0	38600	NOTEST	0.0810293	0	#NAME?	0	1	1	no
AT1G08143.1	1:21267219-21267467	COI0	38600	NOTEST	0	0	0	0	1	1	no
AT1G08147.1	1:21268097-21268414	COI0	38600	NOTEST	0	0	0	0	1	1	no
AT1G08150.1	1:2556190-2559228	COI0	38600	NOTEST	0.170936	0	#NAME?	0	1	1	no
AT1G08153.1	1:21319145-21319482	COI0	38600	NOTEST	0	0	0	0	1	1	no
at1g08157	1:21360150-21360251	COI0	38600	NOTEST	0	0	0	0	1	1	no
AT1G08160.1	1:2559412-2560432	COI0	38600	OK	7.03762	7.53186	0.0979174	0.224217	0.82825	0.998514	no
AT1G08165.1	1:2561448-2562316	COI0	38600	OK	2.16743	0.692576	-1.64594	-2.64587	0.1604	0.998514	no
AT1G08170.1	1:2562768-2563706	COI0	38600	NOTEST	0.253514	0	#NAME?	0	1	1	no
AT1G08173.1	1:21376425-21376913	COI0	38600	NOTEST	0	0	0	0	1	1	no
AT1G08177.1	1:21407276-21407477	COI0	38600	NOTEST	0	0	0	0	1	1	no
AT1G08180.1	1:2564360-2565318	COI0	38600	OK	20.0205	10.4788	-0.934003	-3.46525	0.02855	0.623946	no
AT1G08183.1	1:21421706-21422012	COI0	38600	NOTEST	0	0	0	0	1	1	no
AT1G08190.1	1:2567419-2573448	COI0	38600	OK	43.4016	51.4467	0.245332	0.822413	0.3954	0.998514	no
AT1G08193.1	1:21475231-21475619	COI0	38600	NOTEST	0	0	0	0	1	1	no
AT1G08200.1	1:2573817-2576844	COI0	38600	OK	125.682	156.667	0.317933	1.29698	0.27455	0.998514	no
AT1G08207.1	1:21581193-21581676	COI0	38600	NOTEST	0	0	0	0	1	1	no
AT1G08210.1	1:2576983-2580754	COI0	38600	OK	14.8681	15.8182	0.0893647	0.26788	0.78465	0.998514	no
AT1G08213.1	1:21616453-21617073	COI0	38600	OK	1.35498	1.74091	0.361571	0.566946	0.8055	0.998514	no
AT1G08217.1	1:21616453-21617073	COI0	38600	OK	2.11912	1.12006	-0.919895	-0.615859	0.571	0.998514	no
AT1G08220.1	1:2581021-2583390	COI0	38600	OK	10.3485	10.5517	0.0280651	0.0722958	0.94375	0.998514	no
AT1G08223.1	1:21619120-21619648	COI0	38600	NOTEST	0	0	0	0	1	1	no
AT1G08227.1	1:21619120-21619648	COI0	38600	NOTEST	0	0	0	0	1	1	no
AT1G08230.2	1:2583593-2586969	COI0	38600	OK	31.2222	22.3257	-0.483866	-1.61418	0.10165	0.980785	no
AT1G08237.1	1:21645641-21646022	COI0	38600	NOTEST	0.497662	0	#NAME?	0	1	1	no
AT1G08240.1	1:2588524-2588596	COI0	38600	NOTEST	0	0	0	0	1	1	no
AT1G08247.1	1:21710979-21711281	COI0	38600	NOTEST	0	0	0	0	1	1	no
AT1G08250.1	1:2588775-2607507	COI0	38600	NOTEST	0	0	0	0	1	1	no
AT1G08253.1	1:21859040-21859313	COI0	38600	NOTEST	0	0	0	0	1	1	no
AT1G08257.1	1:21901449-21901697	COI0	38600	NOTEST	0	0	0	0	1	1	no
AT1G08260.1	1:2588775-2607507	COI0	38600	OK	5.50537	5.95168	0.112459	0.418894	0.692	0.998514	no
AT1G08263.1	1:22007824-22008111	COI0	38600	NOTEST	1.14127	0	#NAME?	0	1	1	no
AT1G08267.1	1:22026461-22030289	COI0	38600	NOTEST	0	0	0	0	1	1	no
AT1G08270.1	1:2588775-2607507	COI0	38600	OK	3.9002	5.37469	0.462634	0.236447	0.81935	0.998514	no
AT1G08273.1	1:22026461-22030289	COI0	38600	OK	1.43239	0.951598	-0.590002	-0.177259	0.7631	0.998514	no
AT1G08277.1	1:22075613-22075885	COI0	38600	NOTEST	0	0	0	0	1	1	no
AT1G08280.1	1:2607876-2609971	COI0	38600	OK	7.44388	6.61207	-0.170952	-0.622054	0.6643	0.998514	no
AT1G08283.1	1:22076532-22077068	COI0	38600	OK	9.41479	10.1627	0.110284	0.337553	0.8537	0.998514	no
at1g08287	1:22080688-22086845	COI0	38600	NOTEST	0	0	0	0	1	1	no
AT1G08290.1	1:2609995-2613377	COI0	38600	OK	2.01506	1.85954	-0.11588	-0.227919	0.8363	0.998514	no
AT1G08293.1	1:22087974-22088246	COI0	38600	NOTEST	0	3.1521	inf	0	1	1	no
AT1G08297.1	1:22128870-22129201	COI0	38600	NOTEST	0	0	0	0	1	1	no
AT1G08300.1	1:2614773-2621546	COI0	38600	OK	27.47	23.775	-0.208415	-0.758184	0.503	0.998514	no
at1g08303	1:22150127-22150266	COI0	38600	NOTEST	0	0	0	0	1	1	no
AT1G08313.1	1:22244178-22244406	COI0	38600	NOTEST	0	0	0	0	1	1	no
AT1G08315.1	1:2614773-2621546	COI0	38600	NOTEST	0	0	0	0	1	1	no
AT1G08317.1	1:22261753-22266079	COI0	38600	OK	47.6866	42.0441	-0.181679	-0.651227	0.90255	0.998514	no
AT1G08320.1	1:2621859-2628594	COI0	38600	OK	4.21137	2.71298	-0.63441	-1.34311	0.1703	0.998514	no
AT1G08323.1	1:22275483-22280593	COI0	38600	NOTEST	0	0	0	0	1	1	no
AT1G08327.1	1:22313323-22313411	COI0	38600	NOTEST	0	0	0	0	1	1	no
AT1G08333.1	1:22343584-22349317	COI0	38600	NOTEST	0	0	0	0	1	1	no
at1g08337	1:22372461-22372578	COI0	38600	NOTEST	0	0	0	0	1	1	no
AT1G08340.1	1:2630890-2635866	COI0	38600	OK	2.33956	1.56692	-0.578304	-0.773198	0.46835	0.998514	no
at1g08343	1:22372669-22372790	COI0	38600	NOTEST	0	0	0	0	1	1	no
AT1G08347.1	1:22394548-22394634	COI0	38600	NOTEST	0	0	0	0	1	1	no
AT1G08350.1	1:2630890-2635866	COI0	38600	OK	7.15196	6.33674	-0.174597	-0.425023	0.65845	0.998514	no
AT1G08353.1	1:22428240-22428327	COI0	38600	NOTEST	0	0	0	0	1	1	no
AT1G08357.1	1:22522488-22522725	COI0	38600	NOTEST	0	0	0	0	1	1	no
AT1G08360.1	1:2635938-2640663	COI0	38600	OK	236.448	232.955	-0.0214722	-0.084604	0.9432	0.998514	no
AT1G08363.1	1:22581098-22581302	COI0	38600	NOTEST	0	0	0	0	1	1	no
AT1G08367.1	1:22606785-22606960	COI0	38600	NOTEST	0	0	0	0	1	1	no
AT1G08377.1	1:22612257-22612474	COI0	38600	NOTEST	0	0	0	0	1	1	no
AT1G08380.1	1:2640802-2641934	COI0	38600	OK	675.098	677.93	0.00603975	0.0274978	0.9836	0.998514	no
AT1G08383.1	1:22620084-22620307	COI0	38600	NOTEST	0	0	0	0	1	1	no
AT1G08387.1	1:22659660-22668651	COI0	38600	OK	1.04675	1.61026	0.621379	0.505946	0.61375	0.998514	no
AT1G08390.1	1:2642071-2646048	COI0	38600	OK	8.16748	7.13107	-0.195771	-0.451567	0.77815	0.998514	no
AT1G08393.1	1:22728733-22729039	COI0	38600	NOTEST	0	2.56504	inf	0	1	1	no
AT1G08397.1	1:22740620-22740823	COI0	38600	NOTEST	0	0	0	0	1	1	no
AT1G08400.1	1:2642071-2646048	COI0	38600	OK	4.08306	4.4439	0.122174	0.27033	0.7813	0.998514	no
AT1G08403.1	1:22741574-22741922	COI0	38600	NOTEST	0	0	0	0	1	1	no
AT1G08410.1	1:2646143-2657120	COI0	38600	OK	19.1768	25.8612	0.431426	1.51176	0.12025	0.998514	no
AT1G08413.1	1:22741574-22741922	COI0	38600	NOTEST	0	0	0	0	1	1	no
AT1G08417.1	1:22743171-22743472	COI0	38600	NOTEST	1.04155	0	#NAME?	0	1	1	no
AT1G08427.1	1:22769363-22774720	COI0	38600	NOTEST	0	0	0	0	1	1	no
AT1G08430.1	1:2658601-2661310	COI0	38600	OK	3.67099	2.08031	-0.819372	-1.92399	0.12515	0.998514	no
AT1G08433.1	1:22829920-22834809	COI0	38600	NOTEST	0	0	0	0	1	1	no
AT1G08437.1	1:22829920-22834809	COI0	38600	NOTEST	0	0	0	0	1	1	no
AT1G08440.1	1:2662966-2665584	COI0	38600	NOTEST	0.311198	0.103799	-1.58404	0	1	1	no
AT1G08443.1	1:22867315-22867541	COI0	38600	NOTEST	0	0	0	0	1	1	no
AT1G08447.1	1:22914365-22915032	COI0	38600	NOTEST	0	0	0	0	1	1	no
AT1G08450.1	1:2667797-2671957	COI0	38600	OK	44.2883	49.3186	0.155206	0.553109	0.57105	0.998514	no
AT1G08453.1	1:22918355-22918592	COI0	38600	NOTEST	0	0	0	0	1	1	no
AT1G08460.1	1:2672197-2674721	COI0	38600	OK	20.5014	16.2805	-0.332579	-1.08267	0.26035	0.998514	no
AT1G08463.1	1:22947413-22950488	COI0	38600	NOTEST	0	0	0	0	1	1	no
AT1G08465.1	1:2675812-2679824	COI0	38600	OK	14.8495	12.254	-0.277163	-0.936827	0.45345	0.998514	no
AT1G08470.1	1:2682057-2684171	COI0	38600	OK	14.8303	16.286	0.135091	0.46731	0.6779	0.998514	no
AT1G08473.1	1:22955427-22955842	COI0	38600	NOTEST	0.755157	0	#NAME?	0	1	1	no
AT1G08480.1	1:2684175-2688658	COI0	38600	OK	71.8929	64.7985	-0.149889	-0.480407	0.72225	0.998514	no
AT1G08483.1	1:22988980-22989332	COI0	38600	NOTEST	0	0	0	0	1	1	no
AT1G08487.1	1:23003504-23003714	COI0	38600	NOTEST	0	0	0	0	1	1	no
AT1G08490.1	1:2684175-2688658	COI0	38600	OK	39.5417	50.4198	0.350613	0.949785	0.33065	0.998514	no
AT1G08493.1	1:23006713-23006912	COI0	38600	NOTEST	0	0	0	0	1	1	no
AT1G08497.1	1:23023931-23024189	COI0	38600	NOTEST	0	0	0	0	1	1	no
AT1G08500.1	1:2688879-2690250	COI0	38600	OK	3.40226	5.9727	0.811889	2.43034	0.1611	0.998514	no
AT1G08503.1	1:23030491-23030787	COI0	38600	NOTEST	0	0	0	0	1	1	no
AT1G08507.1	1:23032346-23033035	COI0	38600	NOTEST	0.302994	1.09466	1.85312	0	1	1	no
AT1G08510.1	1:2691061-2694547	COI0	38600	OK	61.0509	64.205	0.072672	0.287741	0.79255	0.998514	no
AT1G08513.1	1:23033402-23039787	COI0	38600	OK	1.34039	1.34679	0.00687594	0.00313526	0.9446	0.998514	no
AT1G08517.1	1:23068046-23068354	COI0	38600	NOTEST	0	0	0	0	1	1	no
AT1G08520.1	1:2696380-2703162	COI0	38600	OK	62.8197	87.8183	0.483305	1.52207	0.10145	0.980785	no
AT1G08523.1	1:23077195-23077601	COI0	38600	NOTEST	0	0	0	0	1	1	no
AT1G08533.1	1:23173285-23179248	COI0	38600	NOTEST	0	0	0	0	1	1	no
AT1G08537.1	1:23173285-23179248	COI0	38600	OK	3.55397	6.13186	0.786892	0.402861	0.7119	0.998514	no
AT1G08540.1	1:2703294-2711000	COI0	38600	OK	63.1789	93.6426	0.567723	1.9827	0.0654	0.859293	no
AT1G08543.1	1:23179398-23185151	COI0	38600	NOTEST	0	0	0	0	1	1	no
AT1G08557.1	1:23227531-23230818	COI0	38600	NOTEST	0.926584	1.41517	0.610983	0	1	1	no
AT1G08560.1	1:2703294-2711000	COI0	38600	OK	20.9413	20.0388	-0.0635567	-0.0750839	0.93915	0.998514	no
AT1G08563.1	1:23252139-23257546	COI0	38600	NOTEST	0	6.44767	inf	0	1	1	no
AT1G08567.1	1:23252139-23257546	COI0	38600	NOTEST	0	0	0	0	1	1	no
AT1G08570.1	1:2712693-2714833	COI0	38600	OK	110.502	198.031	0.841654	2.89132	0.0034	0.197415	no
AT1G08573.1	1:23262294-23263024	COI0	38600	NOTEST	0	0	0	0	1	1	no
AT1G08580.1	1:2714993-2716532	COI0	38600	OK	67.8819	53.9457	-0.331519	-1.54416	0.2597	0.998514	no
AT1G08583.1	1:23314784-23320427	COI0	38600	NOTEST	0	0	0	0	1	1	no
AT1G08587.1	1:23365724-23365930	COI0	38600	NOTEST	0	0	0	0	1	1	no
AT1G08590.1	1:2718537-2722280	COI0	38600	NOTEST	0.108038	0	#NAME?	0	1	1	no
AT1G08592.1	1:2718537-2722280	COI0	38600	OK	5.18163	4.22484	-0.294507	-0.778789	0.4214	0.998514	no
at1g08597	1:23412517-23415155	COI0	38600	OK	4.17783	7.25288	0.795798	0.603305	0.5587	0.998514	no
AT1G08600.1	1:2723676-2735819	COI0	38600	OK	14.9618	17.5102	0.226906	0.736101	0.4532	0.998514	no
AT1G08603.1	1:23415639-23415849	COI0	38600	NOTEST	0	0	0	0	1	1	no
AT1G08607.1	1:23494642-23498381	COI0	38600	NOTEST	0	0	0	0	1	1	no
AT1G08610.1	1:2723676-2735819	COI0	38600	OK	8.83443	10.6742	0.272915	0.393999	0.69115	0.998514	no
AT1G08613.1	1:23514851-23515147	COI0	38600	NOTEST	0	0	0	0	1	1	no
AT1G08620.1	1:2736597-2747967	COI0	38600	OK	11.8879	11.976	0.0106423	0.032252	0.97555	0.998514	no
AT1G08623.1	1:23640069-23640371	COI0	38600	NOTEST	0	0	0	0	1	1	no
AT1G08627.1	1:23640069-23640371	COI0	38600	NOTEST	0	0	0	0	1	1	no
AT1G08630.1	1:2736597-2747967	COI0	38600	OK	16.3951	20.423	0.316934	0.673462	0.4906	0.998514	no
AT1G08633.1	1:23657505-23667372	COI0	38600	OK	2.57237	3.50567	0.44659	0.124209	0.64385	0.998514	no
AT1G08637.1	1:23691268-23691584	COI0	38600	NOTEST	0	0	0	0	1	1	no
AT1G08640.1	1:2748360-2751620	COI0	38600	OK	60.2839	84.6617	0.489936	2.48789	0.0806	0.915647	no
AT1G08643.1	1:23701177-23701304	COI0	38600	NOTEST	0	0	0	0	1	1	no
AT1G08645.1	1:2751812-2753809	COI0	38600	NOTEST	0	0	0	0	1	1	no
AT1G08650.1	1:2751812-2753809	COI0	38600	OK	43.4926	24.3733	-0.835466	-2.90862	0.00375	0.209672	no
AT1G08653.1	1:23807640-23807852	COI0	38600	NOTEST	0	0	0	0	1	1	no
AT1G08657.1	1:23824486-23827136	COI0	38600	OK	28.5855	23.6315	-0.274569	-0.383778	0.698	0.998514	no
AT1G08660.1	1:2756903-2759889	COI0	38600	OK	21.6421	19.9963	-0.114109	-0.378367	0.70315	0.998514	no
AT1G08663.1	1:23842218-23844438	COI0	38600	OK	0.937212	4.13698	2.14213	0.743878	0.4285	0.998514	no
AT1G08667.1	1:23852747-23855658	COI0	38600	OK	3.98731	0	#NAME?	#NAME?	0.18385	0.998514	no
AT1G08670.1	1:2760182-2761599	COI0	38600	NOTEST	0.386284	0.234777	-0.718373	0	1	1	no
AT1G08673.1	1:23895659-23896006	COI0	38600	NOTEST	0	0	0	0	1	1	no
AT1G08677.1	1:23950793-23951106	COI0	38600	NOTEST	0	0	0	0	1	1	no
AT1G08680.1	1:2762583-2769508	COI0	38600	OK	19.7958	28.5296	0.527269	1.87914	0.0528	0.803685	no
AT1G08683.1	1:23950793-23951106	COI0	38600	NOTEST	0	0	0	0	1	1	no
AT1G08695.1	1:2762583-2769508	COI0	38600	NOTEST	0	0	0	0	1	1	no
AT1G08697.1	1:23964147-23964418	COI0	38600	NOTEST	1.60256	2.5553	0.673112	0	1	1	no
AT1G08700.1	1:2769614-2771477	COI0	38600	OK	33.1987	33.3929	0.00841588	0.0383848	0.9773	0.998514	no
AT1G08703.1	1:23966434-23968512	COI0	38600	NOTEST	0	0	0	0	1	1	no
AT1G08707.1	1:23974040-23974789	COI0	38600	OK	6.9456	4.53819	-0.613984	-0.429004	0.6504	0.998514	no
AT1G08710.1	1:2771619-2773531	COI0	38600	OK	15.695	10.9774	-0.515772	-1.45764	0.14435	0.998514	no
AT1G08713.1	1:23975084-23978335	COI0	38600	OK	0.634984	0.860943	0.439197	0.0993425	0.5833	0.998514	no
AT1G08717.1	1:24009578-24009843	COI0	38600	NOTEST	0	0	0	0	1	1	no
AT1G08720.1	1:2773940-2779308	COI0	38600	OK	10.7549	11.7218	0.124193	0.417007	0.66405	0.998514	no
AT1G08730.1	1:2779437-2788477	COI0	38600	OK	0.773195	0.253866	-1.60676	-2.25306	0.031	0.647115	no
AT1G08733.1	1:24129835-24136109	COI0	38600	NOTEST	0	0	0	0	1	1	no
AT1G08737.1	1:24191178-24201346	COI0	38600	NOTEST	0	0	0	0	1	1	no
AT1G08743.1	1:24222946-24223187	COI0	38600	NOTEST	0	0	0	0	1	1	no
AT1G08747.1	1:24229062-24233523	COI0	38600	NOTEST	0.933532	0	#NAME?	0	1	1	no
AT1G08747.2	1:24229062-24233523	COI0	38600	OK	178.466	398.897	1.16037	25.159	0.6479	0.998514	no
AT1G08750.1	1:2801041-2804711	COI0	38600	OK	11.1744	11.659	0.0612426	0.163519	0.86605	0.998514	no
AT1G08753.1	1:24295168-24298608	COI0	38600	OK	3.04597	7.16256	1.23357	1.59511	0.67025	0.998514	no
AT1G08753.2	1:24295168-24298608	COI0	38600	OK	4.50233	20.1677	2.1633	0.375092	0.44975	0.998514	no
AT1G08757.1	1:24339370-24340154	COI0	38600	NOTEST	0.731581	0.207821	-1.81568	0	1	1	no
AT1G08760.1	1:2805043-2808623	COI0	38600	OK	12.4656	11.5033	-0.115907	-0.385518	0.69165	0.998514	no
AT1G08763.1	1:24345646-24345921	COI0	38600	NOTEST	0	0	0	0	1	1	no
AT1G08767.1	1:24376614-24376890	COI0	38600	NOTEST	0	0	0	0	1	1	no
AT1G08770.1	1:2808759-2809775	COI0	38600	OK	20.9117	23.8318	0.188573	0.774546	0.58635	0.998514	no
AT1G08773.1	1:24447826-24448071	COI0	38600	NOTEST	0	0	0	0	1	1	no
AT1G08777.1	1:24472727-24476891	COI0	38600	NOTEST	0	0	0	0	1	1	no
AT1G08780.1	1:2809777-2811313	COI0	38600	OK	33.6347	34.4792	0.0357763	0.124826	0.91335	0.998514	no
at1g08783	1:24543739-24544014	COI0	38600	NOTEST	0	0	0	0	1	1	no
AT1G08787.1	1:24544545-24544782	COI0	38600	NOTEST	0	0	0	0	1	1	no
AT1G08790.1	1:2811988-2812782	COI0	38600	NOTEST	0.118326	0	#NAME?	0	1	1	no
AT1G08797.1	1:24551806-24558322	COI0	38600	NOTEST	0	1.22266	inf	0	1	1	no
AT1G08800.1	1:2812817-2818071	COI0	38600	OK	10.4823	10.101	-0.0534592	-0.178994	0.85345	0.998514	no
AT1G08803.1	1:24551806-24558322	COI0	38600	OK	45.7029	83.1301	0.863087	0.0835822	0.37955	0.998514	no
AT1G08807.1	1:24576761-24577005	COI0	38600	NOTEST	0	0	0	0	1	1	no
AT1G08810.1	1:2819064-2820478	COI0	38600	OK	31.8367	20.7844	-0.61519	-1.95753	0.04575	0.763486	no
AT1G08817.1	1:24675158-24675406	COI0	38600	NOTEST	0	0	0	0	1	1	no
AT1G08820.1	1:2821353-2825481	COI0	38600	OK	24.7567	25.525	0.0440956	0.153151	0.87125	0.998514	no
AT1G08823.1	1:24712211-24712790	COI0	38600	NOTEST	0	0	0	0	1	1	no
AT1G08827.1	1:24712211-24712790	COI0	38600	NOTEST	0	0	0	0	1	1	no
AT1G08830.1	1:2827059-2841134	COI0	38600	OK	44.7499	81.3819	0.862825	3.12129	0.011	0.390613	no
AT1G08833.1	1:24721320-24721663	COI0	38600	NOTEST	0	0	0	0	1	1	no
AT1G08840.1	1:2827059-2841134	COI0	38600	OK	2.36346	3.21682	0.444733	0.750131	0.49895	0.998514	no
AT1G08843.1	1:24745573-24745815	COI0	38600	NOTEST	0	0	0	0	1	1	no
AT1G08845.1	1:2827059-2841134	COI0	38600	OK	10.8952	9.9168	-0.13575	-0.17326	0.86045	0.998514	no
AT1G08847.1	1:24912511-24912977	COI0	38600	NOTEST	1.68444	0	#NAME?	0	1	1	no
AT1G08853.1	1:24945483-24955694	COI0	38600	NOTEST	0.425289	0	#NAME?	0	1	1	no
AT1G08857.1	1:24945483-24955694	COI0	38600	NOTEST	0.905039	0.562958	-0.684953	0	1	1	no
AT1G08857.2	1:24945483-24955694	COI0	38600	OK	6.91446	3.96995	-0.800497	-0.611688	0.55615	0.998514	no
AT1G08860.1	1:2841968-2846350	COI0	38600	NOTEST	0.772755	0.447709	-0.787451	0	1	1	no
AT1G08863.1	1:24964332-24964615	COI0	38600	NOTEST	0	0	0	0	1	1	no
AT1G08867.1	1:24969873-24974946	COI0	38600	NOTEST	0	0	0	0	1	1	no
AT1G08870.1	1:2846535-2846608	COI0	38600	NOTEST	0	0	0	0	1	1	no
AT1G08877.1	1:25017841-25019057	COI0	38600	NOTEST	0	0	0	0	1	1	no
AT1G08880.1	1:2846893-2848100	COI0	38600	OK	63.0086	54.359	-0.21303	-0.883286	0.449	0.998514	no
AT1G08883.1	1:25019104-25022891	COI0	38600	NOTEST	0	0	0	0	1	1	no
AT1G08887.1	1:25027118-25027355	COI0	38600	NOTEST	0	0	0	0	1	1	no
AT1G08890.1	1:2848148-2852270	COI0	38600	OK	1.97249	3.00871	0.60913	1.59702	0.32	0.998514	no
AT1G08893.1	1:25032593-25033048	COI0	38600	NOTEST	0	0	0	0	1	1	no
AT1G08897.1	1:25032593-25033048	COI0	38600	NOTEST	0	0	0	0	1	1	no
AT1G08900.1	1:2852362-2855941	COI0	38600	OK	14.8494	20.8327	0.488444	1.43302	0.14435	0.998514	no
AT1G08903.1	1:25119572-25119824	COI0	38600	NOTEST	0	0	0	0	1	1	no
AT1G08907.1	1:25139088-25139293	COI0	38600	NOTEST	0	0	0	0	1	1	no
AT1G08910.1	1:2856161-2861170	COI0	38600	OK	11.2185	13.2789	0.24325	0.68948	0.40375	0.998514	no
AT1G08913.1	1:25145044-25145523	COI0	38600	NOTEST	0	0	0	0	1	1	no
AT1G08920.1	1:2867202-2870745	COI0	38600	OK	17.4067	25.0644	0.525995	1.68099	0.08695	0.936394	no
AT1G08923.1	1:25174144-25174393	COI0	38600	NOTEST	0	0	0	0	1	1	no
AT1G08927.1	1:25219562-25219954	COI0	38600	NOTEST	0	0	0	0	1	1	no
AT1G08930.1	1:2873299-2877270	COI0	38600	OK	46.1131	45.7929	-0.0100541	-0.035529	0.97125	0.998514	no
AT1G08933.1	1:25219562-25219954	COI0	38600	NOTEST	0	0	0	0	1	1	no
AT1G08937.1	1:25262133-25265861	COI0	38600	NOTEST	0	0	0	0	1	1	no
AT1G08940.1	1:2877429-2879169	COI0	38600	OK	6.77292	4.78914	-0.500012	-1.04338	0.25965	0.998514	no
AT1G08947.1	1:25338080-25338392	COI0	38600	NOTEST	1.64925	0	#NAME?	0	1	1	no
AT1G08950.1	1:2879302-2879374	COI0	38600	NOTEST	0	0	0	0	1	1	no
AT1G08953.1	1:25386023-25391258	COI0	38600	NOTEST	0	0	0	0	1	1	no
AT1G08960.1	1:2879505-2882234	COI0	38600	OK	7.05046	8.95178	0.344457	1.35991	0.36865	0.998514	no
AT1G08963.1	1:25477669-25480580	COI0	38600	NOTEST	0	0	0	0	1	1	no
AT1G08967.1	1:25536811-25537318	COI0	38600	NOTEST	0	0	0	0	1	1	no
AT1G08970.1	1:2882490-2886621	COI0	38600	OK	67.1543	71.0604	0.0815653	0.2735	0.7618	0.998514	no
AT1G08977.1	1:25612600-25612883	COI0	38600	NOTEST	0	0	0	0	1	1	no
AT1G08983.1	1:25617342-25617842	COI0	38600	NOTEST	0	0	0	0	1	1	no
AT1G08985.1	1:2887244-2887706	COI0	38600	NOTEST	0.325524	0	#NAME?	0	1	1	no
AT1G08987.1	1:25646038-25649254	COI0	38600	NOTEST	0	0	0	0	1	1	no
AT1G08990.1	1:2888426-2890965	COI0	38600	OK	0.741176	0.487602	-0.604112	-0.73699	0.44	0.998514	no
AT1G08993.1	1:25740061-25740329	COI0	38600	NOTEST	0	0	0	0	1	1	no
AT1G08997.1	1:25751562-25751882	COI0	38600	NOTEST	0	0	0	0	1	1	no
AT1G09000.1	1:2891018-2899446	COI0	38600	OK	1.65616	2.01158	0.280484	0.219913	0.84595	0.998514	no
AT1G09003.1	1:25768538-25772650	COI0	38600	NOTEST	0	0	0	0	1	1	no
AT1G09007.1	1:25785505-25787611	COI0	38600	NOTEST	0	0	0	0	1	1	no
AT1G09010.1	1:2891018-2899446	COI0	38600	OK	23.2512	33.0336	0.50663	1.76973	0.0707	0.883389	no
AT1G09013.1	1:25845891-25850131	COI0	38600	NOTEST	0	0	0	0	1	1	no
AT1G09017.1	1:25893304-25893649	COI0	38600	NOTEST	0	0	0	0	1	1	no
AT1G09020.1	1:2899775-2904862	COI0	38600	OK	29.1719	24.6252	-0.244443	-0.892369	0.3825	0.998514	no
AT1G09027.1	1:25926848-25927337	COI0	38600	NOTEST	0	0	0	0	1	1	no
AT1G09030.1	1:2908610-2909032	COI0	38600	NOTEST	0	0	0	0	1	1	no
AT1G09033.1	1:25954831-25955368	COI0	38600	NOTEST	0	0	0	0	1	1	no
AT1G09037.1	1:25954831-25955368	COI0	38600	NOTEST	0	0	0	0	1	1	no
AT1G09040.1	1:2911249-2915406	COI0	38600	OK	3.46656	3.88766	0.165397	0.454728	0.6664	0.998514	no
AT1G09043.1	1:25996142-25996343	COI0	38600	NOTEST	0	0	0	0	1	1	no
AT1G09047.1	1:25996564-25997011	COI0	38600	NOTEST	0	0	0	0	1	1	no
AT1G09050.1	1:2916967-2925826	COI0	38600	OK	3.05042	3.8686	0.342804	0.432878	0.68275	0.998514	no
AT1G09053.1	1:26038904-26042741	COI0	38600	OK	8.93672	12.8868	0.528081	1.19041	0.229	0.998514	no
AT1G09057.1	1:26111317-26111522	COI0	38600	NOTEST	0	0	0	0	1	1	no
AT1G09060.1	1:2916967-2925826	COI0	38600	OK	26.6864	28.1965	0.0794126	0.26642	0.7865	0.998514	no
AT1G09063.1	1:26128287-26133539	COI0	38600	NOTEST	0	0	0	0	1	1	no
AT1G09067.1	1:26148020-26153600	COI0	38600	NOTEST	0	0	0	0	1	1	no
AT1G09070.1	1:2927501-2929107	COI0	38600	OK	67.886	63.6367	-0.0932545	-0.311451	0.73365	0.998514	no
AT1G09073.1	1:26182155-26183684	COI0	38600	NOTEST	0	0	0	0	1	1	no
AT1G09077.1	1:26186390-26186596	COI0	38600	NOTEST	0	0	0	0	1	1	no
AT1G09080.1	1:2929216-2931850	COI0	38600	OK	2.35851	1.63539	-0.528242	-1.00125	0.30295	0.998514	no
AT1G09083.1	1:26189774-26191404	COI0	38600	NOTEST	0	0	0	0	1	1	no
AT1G09087.1	1:26189774-26191404	COI0	38600	NOTEST	0	0	0	0	1	1	no
AT1G09090.1	1:2932738-2939363	COI0	38600	NOTEST	0.224141	0.16505	-0.441505	0	1	1	no
AT1G09097.1	1:26207813-26208030	COI0	38600	NOTEST	0	0	0	0	1	1	no
AT1G09100.1	1:2932738-2939363	COI0	38600	OK	22.7591	22.5214	-0.0151482	-0.0505068	0.95955	0.998514	no
AT1G09103.1	1:26209716-26210001	COI0	38600	NOTEST	0	0	0	0	1	1	no
AT1G09107.1	1:26271540-26272267	COI0	38600	NOTEST	0	0	0	0	1	1	no
AT1G09110.1	1:2939416-2939488	COI0	38600	NOTEST	0	0	0	0	1	1	no
AT1G09113.1	1:26271540-26272267	COI0	38600	NOTEST	0	0	0	0	1	1	no
AT1G09117.1	1:26281565-26281767	COI0	38600	NOTEST	0	0	0	0	1	1	no
AT1G09123.1	1:26308148-26308427	COI0	38600	NOTEST	0	0	0	0	1	1	no
AT1G09127.1	1:26355787-26357731	COI0	38600	NOTEST	0	0	0	0	1	1	no
AT1G09130.1	1:2939567-2942345	COI0	38600	OK	135.565	169.246	0.320138	1.0948	0.2626	0.998514	no
AT1G09133.1	1:26382597-26382799	COI0	38600	NOTEST	0	0	0	0	1	1	no
AT1G09137.1	1:26425752-26425999	COI0	38600	NOTEST	0	0	0	0	1	1	no
AT1G09140.1	1:2942537-2945976	COI0	38600	OK	156.122	189.419	0.278901	0.961771	0.31855	0.998514	no
AT1G09143.1	1:26432296-26434538	COI0	38600	NOTEST	0	0	0	0	1	1	no
AT1G09147.1	1:26445044-26445798	COI0	38600	NOTEST	0	0	0	0	1	1	no
AT1G09150.1	1:2946029-2949159	COI0	38600	OK	47.1819	42.6995	-0.144015	-0.528115	0.6046	0.998514	no
AT1G09153.1	1:26445044-26445798	COI0	38600	NOTEST	0	0	0	0	1	1	no
AT1G09155.1	1:2949620-2950989	COI0	38600	NOTEST	0.618856	0.519186	-0.253351	0	1	1	no
AT1G09157.1	1:2951634-2952490	COI0	38600	NOTEST	0.094062	0	#NAME?	0	1	1	no
AT1G09160.1	1:2952596-2955745	COI0	38600	OK	31.5907	29.6601	-0.090973	-0.31743	0.7426	0.998514	no
AT1G09163.1	1:26488133-26488333	COI0	38600	NOTEST	0	0	0	0	1	1	no
AT1G09167.1	1:26502908-26506672	COI0	38600	OK	3.38369	7.1263	1.07455	0.336222	0.70635	0.998514	no
AT1G09170.1	1:2956260-2962546	COI0	38600	NOTEST	0.22988	0.0987622	-1.21885	0	1	1	no
AT1G09173.1	1:26542321-26542675	COI0	38600	NOTEST	0	0	0	0	1	1	no
AT1G09176.1	1:2964014-2964727	COI0	38600	NOTEST	0.460689	0.630672	0.453098	0	1	1	no
AT1G09177.1	1:26542321-26542675	COI0	38600	NOTEST	0	0	0	0	1	1	no
AT1G09180.1	1:2965022-2965972	COI0	38600	OK	3.794	4.63954	0.290265	0.64709	0.669	0.998514	no
AT1G09183.1	1:26544623-26544852	COI0	38600	NOTEST	0	0	0	0	1	1	no
AT1G09187.1	1:26569596-26569972	COI0	38600	NOTEST	0	0	0	0	1	1	no
AT1G09190.1	1:2966119-2967733	COI0	38600	OK	2.67336	3.47768	0.379468	0.738672	0.4408	0.998514	no
AT1G09195.1	1:2967939-2972334	COI0	38600	OK	89.4317	81.4705	-0.134509	-0.453253	0.6484	0.998514	no
AT1G09197.1	1:26697371-26697740	COI0	38600	NOTEST	0.667386	0	#NAME?	0	1	1	no
AT1G09207.1	1:26772595-26772935	COI0	38600	NOTEST	0	0	0	0	1	1	no
AT1G09210.1	1:2972637-2977002	COI0	38600	OK	77.3738	95.536	0.304199	0.900985	0.2955	0.998514	no
at1g09213	1:26772595-26772935	COI0	38600	OK	0	1.64202	inf	#NAME?	0.0672	0.866886	no
AT1G09217.1	1:26794195-26794614	COI0	38600	NOTEST	0	0	0	0	1	1	no
AT1G09220.1	1:2977791-2982713	COI0	38600	OK	20.5491	21.4775	0.0637479	0.210536	0.83245	0.998514	no
AT1G09223.1	1:26860109-26863454	COI0	38600	NOTEST	0	0	0	0	1	1	no
AT1G09227.1	1:26873394-26873938	COI0	38600	NOTEST	0	0	0	0	1	1	no
AT1G09233.1	1:26874063-26880064	COI0	38600	NOTEST	0	0	0	0	1	1	no
AT1G09237.1	1:26895255-26895298	COI0	38600	NOTEST	0	0	0	0	1	1	no
AT1G09240.1	1:2984828-2986231	COI0	38600	OK	63.2306	30.7395	-1.04053	-5.36733	0.0007	0.0693825	no
AT1G09243.1	1:26904261-26904744	COI0	38600	NOTEST	0	0	0	0	1	1	no
AT1G09245.1	1:2986873-2987393	COI0	38600	NOTEST	0	0	0	0	1	1	no
AT1G09247.1	1:26920411-26924431	COI0	38600	NOTEST	0	0	0	0	1	1	no
AT1G09250.1	1:2989140-2990427	COI0	38600	OK	26.0572	25.4953	-0.0314525	-0.101082	0.9183	0.998514	no
AT1G09253.1	1:26931851-26935825	COI0	38600	OK	197.56	272.049	0.461574	3.42456	0.19585	0.998514	no
AT1G09257.1	1:26931851-26935825	COI0	38600	OK	2.13201	0.760629	-1.48695	-0.405873	0.6101	0.998514	no
AT1G09260.1	1:2993380-2993820	COI0	38600	NOTEST	0.589463	0	#NAME?	0	1	1	no
AT1G09263.1	1:26973566-26981046	COI0	38600	NOTEST	0	0	0	0	1	1	no
AT1G09267.1	1:27026676-27031461	COI0	38600	NOTEST	0	0	0	0	1	1	no
AT1G09270.1	1:2994330-3001362	COI0	38600	OK	33.2243	33.4268	0.00876642	0.0277653	0.97785	0.998514	no
AT1G09273.1	1:27042716-27043026	COI0	38600	NOTEST	0	0	0	0	1	1	no
AT1G09277.1	1:27073230-27073709	COI0	38600	NOTEST	0	0	0	0	1	1	no
AT1G09280.1	1:2994330-3001362	COI0	38600	OK	16.7431	16.3195	-0.0369635	-0.071936	0.9409	0.998514	no
AT1G09283.1	1:27073230-27073709	COI0	38600	NOTEST	0	0	0	0	1	1	no
AT1G09287.1	1:27078523-27081641	COI0	38600	NOTEST	0	0	0	0	1	1	no
AT1G09290.1	1:3001438-3008381	COI0	38600	OK	11.142	10.6865	-0.06022	-0.155973	0.9017	0.998514	no
AT1G09293.1	1:27090632-27090945	COI0	38600	NOTEST	0.803026	0	#NAME?	0	1	1	no
AT1G09297.1	1:27118176-27119918	COI0	38600	OK	16.7206	14.4817	-0.207397	-0.228443	0.81735	0.998514	no
AT1G09300.1	1:3001438-3008381	COI0	38600	OK	10.0599	10.9504	0.122368	0.315001	0.74315	0.998514	no
AT1G09303.1	1:27120156-27123029	COI0	38600	NOTEST	0	0	0	0	1	1	no
AT1G09307.1	1:27276710-27277043	COI0	38600	NOTEST	0	0	0	0	1	1	no
AT1G09310.1	1:3008909-3012407	COI0	38600	OK	763.51	1171.51	0.61765	1.55652	0.1182	0.998514	no
AT1G09313.1	1:27305685-27306118	COI0	38600	NOTEST	0	0	0	0	1	1	no
AT1G09317.1	1:27312953-27314644	COI0	38600	OK	0.747202	2.19599	1.5553	0.446172	0.567	0.998514	no
AT1G09320.1	1:3008909-3012407	COI0	38600	OK	6.43584	8.0259	0.318533	0.0969373	0.93385	0.998514	no
AT1G09323.1	1:27324366-27330031	COI0	38600	OK	0	10.2745	inf	#NAME?	0.1856	0.998514	no
AT1G09327.1	1:27338033-27340328	COI0	38600	OK	1.74463	3.02834	0.795602	0.254218	0.7893	0.998514	no
AT1G09330.1	1:3012738-3018542	COI0	38600	OK	42.9719	44.7215	0.057577	0.051027	0.9754	0.998514	no
AT1G09337.1	1:27363311-27363766	COI0	38600	NOTEST	0	0	0	0	1	1	no
AT1G09340.1	1:3012738-3018542	COI0	38600	OK	296.413	476.387	0.684526	1.81016	0.06685	0.866548	no
AT1G09343.1	1:27437637-27437846	COI0	38600	NOTEST	0	0	0	0	1	1	no
AT1G09350.1	1:3019638-3021443	COI0	38600	NOTEST	0.22642	0.0538097	-2.07306	0	1	1	no
AT1G09353.1	1:27440982-27441586	COI0	38600	NOTEST	0	0	0	0	1	1	no
AT1G09357.1	1:27443938-27445997	COI0	38600	NOTEST	0	0	0	0	1	1	no
AT1G09360.1	1:3021801-3022368	COI0	38600	NOTEST	0	0	0	0	1	1	no
AT1G09363.1	1:27473762-27475962	COI0	38600	OK	7.1138	2.71662	-1.3888	-1.83395	0.4795	0.998514	no
AT1G09367.1	1:27491183-27496969	COI0	38600	NOTEST	0	7.85721	inf	0	1	1	no
AT1G09370.1	1:3024876-3025539	COI0	38600	NOTEST	0	0	0	0	1	1	no
AT1G09373.1	1:27534532-27534769	COI0	38600	NOTEST	0	0	0	0	1	1	no
AT1G09377.1	1:27578092-27578401	COI0	38600	NOTEST	0	0	0	0	1	1	no
AT1G09380.1	1:3026061-3029549	COI0	38600	OK	1.11115	0.730484	-0.605124	-0.89538	0.465	0.998514	no
AT1G09383.1	1:27611353-27612815	COI0	38600	OK	6.42749	7.01482	0.126152	0.0622372	0.91055	0.998514	no
AT1G09387.1	1:27641612-27642030	COI0	38600	NOTEST	0	0	0	0	1	1	no
AT1G09390.1	1:3031045-3035396	COI0	38600	OK	11.7306	9.35221	-0.326897	-0.993332	0.3725	0.998514	no
AT1G09393.1	1:27656279-27656750	COI0	38600	NOTEST	0	0	0	0	1	1	no
AT1G09397.1	1:27656279-27656750	COI0	38600	NOTEST	0	0	0	0	1	1	no
AT1G09400.1	1:3031045-3035396	COI0	38600	OK	1.23144	0.957725	-0.362667	-0.282341	0.7792	0.998514	no
AT1G09407.1	1:27720249-27720698	COI0	38600	NOTEST	0	0	0	0	1	1	no
AT1G09410.1	1:3035399-3037687	COI0	38600	OK	1.26755	0.929036	-0.448235	-0.79386	0.509	0.998514	no
AT1G09415.1	1:3037753-3038408	COI0	38600	OK	34.8841	45.6676	0.388599	1.61414	0.24695	0.998514	no
AT1G09417.1	1:27761943-27762256	COI0	38600	NOTEST	0	0	0	0	1	1	no
AT1G09420.1	1:3038461-3041873	COI0	38600	OK	9.02549	10.6656	0.240888	0.745873	0.45735	0.998514	no
AT1G09421.1	1:3038461-3041873	COI0	38600	OK	1.01252	0.897973	-0.1732	-0.0563007	0.836	0.998514	no
AT1G09423.1	1:27897039-27902025	COI0	38600	OK	6.55591	0	#NAME?	#NAME?	0.215	0.998514	no
AT1G09427.1	1:27906908-27910187	COI0	38600	OK	3.81248	4.62371	0.27832	0.21909	0.8305	0.998514	no
AT1G09430.1	1:3041995-3048006	COI0	38600	OK	51.448	41.2423	-0.318993	-1.36028	0.2781	0.998514	no
AT1G09433.1	1:27935155-27940369	COI0	38600	NOTEST	6.08662	0	#NAME?	0	1	1	no
AT1G09437.1	1:27954128-27959400	COI0	38600	NOTEST	0	0	0	0	1	1	no
AT1G09440.1	1:3041995-3048006	COI0	38600	OK	9.12609	5.88043	-0.634075	-0.793467	0.42135	0.998514	no
AT1G09443.1	1:27954128-27959400	COI0	38600	OK	4.38986	7.48059	0.768976	0.36925	0.73675	0.998514	no
AT1G09447.1	1:27965533-27969965	COI0	38600	NOTEST	0	2.2961	inf	0	1	1	no
AT1G09450.1	1:3048965-3053163	COI0	38600	OK	2.14282	2.22997	0.0575154	0.115203	0.9062	0.998514	no
AT1G09457.1	1:27975167-27980456	COI0	38600	NOTEST	0	0	0	0	1	1	no
AT1G09460.1	1:3053697-3057543	COI0	38600	OK	7.28931	6.62233	-0.138443	-0.287764	0.74415	0.998514	no
AT1G09463.1	1:27975167-27980456	COI0	38600	NOTEST	0	0	0	0	1	1	no
AT1G09467.1	1:27984974-27985042	COI0	38600	NOTEST	0	0	0	0	1	1	no
AT1G09470.1	1:3053697-3057543	COI0	38600	OK	7.12314	6.40919	-0.15237	-0.280701	0.77875	0.998514	no
AT1G09480.1	1:3057974-3060757	COI0	38600	OK	6.55009	6.84256	0.0630212	0.134817	0.89055	0.998514	no
AT1G09483.1	1:3061169-3061743	COI0	38600	NOTEST	0.381076	0	#NAME?	0	1	1	no
AT1G09490.1	1:3063935-3065949	COI0	38600	OK	27.0338	38.7619	0.519877	1.72576	0.0787	0.911397	no
AT1G09493.1	1:28045331-28048289	COI0	38600	NOTEST	0	0	0	0	1	1	no
AT1G09497.1	1:28045331-28048289	COI0	38600	NOTEST	0	0	0	0	1	1	no
AT1G09500.1	1:3066673-3068796	COI0	38600	OK	21.0594	20.445	-0.0427197	-0.122108	0.8984	0.998514	no
AT1G09503.1	1:28056528-28056805	COI0	38600	NOTEST	0	0	0	0	1	1	no
AT1G09507.1	1:28056528-28056805	COI0	38600	NOTEST	0	0	0	0	1	1	no
AT1G09510.1	1:3069356-3070910	COI0	38600	NOTEST	0.172437	0	#NAME?	0	1	1	no
AT1G09513.1	1:28078851-28082671	COI0	38600	NOTEST	0	2.51383	inf	0	1	1	no
AT1G09520.1	1:3070914-3072074	COI0	38600	OK	27.426	23.0371	-0.251584	-0.968124	0.43025	0.998514	no
AT1G09523.1	1:28185503-28189765	COI0	38600	OK	51.9588	36.3	-0.517402	-3.5847	0.81335	0.998514	no
AT1G09527.1	1:28185503-28189765	COI0	38600	NOTEST	0	0	0	0	1	1	no
AT1G09530.1	1:3075767-3079654	COI0	38600	OK	36.9682	34.2318	-0.110949	-0.389842	0.68615	0.998514	no
AT1G09533.1	1:28212218-28212357	COI0	38600	NOTEST	0	0	0	0	1	1	no
AT1G09537.1	1:28213665-28219186	COI0	38600	OK	2.53411	5.17482	1.03003	0.816846	0.7352	0.998514	no
AT1G09540.1	1:3086100-3087914	COI0	38600	OK	1.93539	1.48643	-0.38077	-0.604822	0.53455	0.998514	no
AT1G09543.1	1:28213665-28219186	COI0	38600	OK	1.6534	1.02955	-0.683425	-0.316976	0.8051	0.998514	no
AT1G09543.2	1:28213665-28219186	COI0	38600	OK	3.11681	4.76972	0.613834	0.312888	0.77165	0.998514	no
AT1G09547.1	1:28288908-28289117	COI0	38600	NOTEST	0	0	0	0	1	1	no
AT1G09550.1	1:3089575-3092327	COI0	38600	NOTEST	0.112511	0	#NAME?	0	1	1	no
AT1G09557.1	1:28313378-28318375	COI0	38600	OK	13.2372	106.884	3.01338	0.87864	0.371	0.998514	no
AT1G09560.1	1:3093643-3094954	COI0	38600	OK	103.769	107.535	0.05142	0.230844	0.8524	0.998514	no
AT1G09567.1	1:28343828-28344031	COI0	38600	NOTEST	0	0	0	0	1	1	no
AT1G09570.1	1:3095159-3100819	COI0	38600	OK	32.7285	27.8588	-0.232412	-0.834435	0.3891	0.998514	no
AT1G09573.1	1:28420322-28420635	COI0	38600	NOTEST	0.913778	1.3942	0.609521	0	1	1	no
AT1G09575.1	1:3101148-3103677	COI0	38600	OK	3.26018	3.79134	0.217758	0.368501	0.70925	0.998514	no
AT1G09577.1	1:28467240-28467900	COI0	38600	NOTEST	0	0	0	0	1	1	no
AT1G09580.1	1:3104491-3107801	COI0	38600	OK	224.505	251.537	0.164019	0.571161	0.5601	0.998514	no
AT1G09583.1	1:28470023-28470292	COI0	38600	NOTEST	0	0	0	0	1	1	no
AT1G09587.1	1:28487909-28488251	COI0	38600	NOTEST	0	0	0	0	1	1	no
AT1G09593.1	1:28495289-28495666	COI0	38600	NOTEST	0	0	0	0	1	1	no
AT1G09597.1	1:28495289-28495666	COI0	38600	NOTEST	0	0	0	0	1	1	no
AT1G09600.1	1:3107895-3111552	COI0	38600	OK	0.942661	0.41196	-1.19423	-1.7327	0.10395	0.984737	no
AT1G09603.1	1:28503778-28507168	COI0	38600	NOTEST	0	0	0	0	1	1	no
AT1G09607.1	1:28568367-28568677	COI0	38600	NOTEST	0	1.33243	inf	0	1	1	no
AT1G09610.1	1:3111693-3116699	COI0	38600	NOTEST	0	0	0	0	1	1	no
AT1G09613.1	1:28600506-28600725	COI0	38600	NOTEST	0	0	0	0	1	1	no
AT1G09617.1	1:28639452-28646721	COI0	38600	OK	3.74095	3.86241	0.0460989	0.0486707	0.97765	0.998514	no
AT1G09620.1	1:3111693-3116699	COI0	38600	OK	60.8739	73.5186	0.272285	0.922912	0.3418	0.998514	no
AT1G09623.1	1:28639452-28646721	COI0	38600	OK	21.3321	22.2737	0.0623117	0.034028	0.96695	0.998514	no
AT1G09625.1	1:3117136-3117567	COI0	38600	NOTEST	0	0	0	0	1	1	no
AT1G09627.1	1:28655207-28661710	COI0	38600	NOTEST	0	0	0	0	1	1	no
AT1G09630.1	1:3118154-3122542	COI0	38600	OK	14.6162	18.2328	0.318968	0.244384	0.841	0.998514	no
AT1G09633.1	1:28739769-28740168	COI0	38600	NOTEST	0	0	0	0	1	1	no
AT1G09637.1	1:28776625-28783257	COI0	38600	NOTEST	0	0	0	0	1	1	no
AT1G09640.1	1:3118154-3122542	COI0	38600	OK	199.997	206.114	0.0434615	0.134749	0.88985	0.998514	no
AT1G09645.1	1:3122925-3124667	COI0	38600	OK	48.5545	39.6376	-0.292735	-1.4944	0.3596	0.998514	no
AT1G09647.1	1:28785164-28785372	COI0	38600	OK	38.5906	21.9855	-0.811701	-12.9418	0.56275	0.998514	no
AT1G09650.1	1:3125174-3127284	COI0	38600	NOTEST	0.589317	0.346424	-0.766506	0	1	1	no
AT1G09653.1	1:28801489-28801798	COI0	38600	NOTEST	0	0	0	0	1	1	no
AT1G09657.1	1:28811039-28814378	COI0	38600	NOTEST	0	0	0	0	1	1	no
AT1G09660.1	1:3127761-3131094	COI0	38600	OK	26.3997	28.8677	0.128937	0.436411	0.65855	0.998514	no
AT1G09663.1	1:28811039-28814378	COI0	38600	NOTEST	0	0	0	0	1	1	no
AT1G09665.1	1:3133007-3133674	COI0	38600	NOTEST	0	0	0	0	1	1	no
AT1G09673.1	1:28814433-28823727	COI0	38600	NOTEST	0.68834	0.494216	-0.477979	0	1	1	no
AT1G09677.1	1:28847870-28855750	COI0	38600	OK	2.64967	1.61934	-0.710405	-0.354368	0.72955	0.998514	no
AT1G09680.1	1:3133884-3135976	COI0	38600	OK	1.7209	1.80395	0.0680026	0.157658	0.9144	0.998514	no
AT1G09683.1	1:28886890-28887095	COI0	38600	NOTEST	0	0	0	0	1	1	no
at1g09687	1:28889374-28889532	COI0	38600	OK	113.412	0	#NAME?	#NAME?	0.0382	0.705699	no
AT1G09690.1	1:3136187-3140353	COI0	38600	OK	316.968	339.745	0.100116	0.369026	0.7454	0.998514	no
AT1G09693.1	1:28890573-28890814	COI0	38600	NOTEST	0	0	0	0	1	1	no
AT1G09697.1	1:28928286-28928704	COI0	38600	NOTEST	0	0	0	0	1	1	no
AT1G09703.1	1:28963503-28963894	COI0	38600	NOTEST	0	0	0	0	1	1	no
AT1G09710.1	1:3140861-3144381	COI0	38600	OK	6.48087	7.23848	0.1595	0.446295	0.64665	0.998514	no
AT1G09713.1	1:28975254-28978750	COI0	38600	OK	29.5467	55.9117	0.920152	0.844954	0.3963	0.998514	no
AT1G09717.1	1:29079252-29079454	COI0	38600	NOTEST	0	0	0	0	1	1	no
AT1G09720.1	1:3144437-3147303	COI0	38600	NOTEST	0	0	0	0	1	1	no
AT1G09723.1	1:29080816-29081025	COI0	38600	NOTEST	0	0	0	0	1	1	no
AT1G09730.1	1:3147636-3156376	COI0	38600	OK	18.474	18.5255	0.00401935	0.0144234	0.98865	0.998514	no
AT1G09733.1	1:29098674-29099062	COI0	38600	NOTEST	0	0	0	0	1	1	no
AT1G09737.1	1:29173077-29173283	COI0	38600	NOTEST	0	0	0	0	1	1	no
AT1G09740.1	1:3147636-3156376	COI0	38600	OK	15.4485	17.7433	0.19981	0.310399	0.7521	0.998514	no
AT1G09743.1	1:29197720-29197924	COI0	38600	NOTEST	0	0	0	0	1	1	no
AT1G09747.1	1:29198599-29198955	COI0	38600	NOTEST	0	0	0	0	1	1	no
AT1G09750.1	1:3157500-3161692	COI0	38600	OK	41.255	41.5182	0.00917219	0.0208576	0.97985	0.998514	no
AT1G09753.1	1:29208881-29209127	COI0	38600	OK	6.42462	0	#NAME?	#NAME?	0.0382	0.705699	no
AT1G09757.1	1:29253331-29260617	COI0	38600	NOTEST	0	0	0	0	1	1	no
AT1G09760.1	1:3157500-3161692	COI0	38600	OK	63.265	73.8205	0.222614	0.527029	0.5879	0.998514	no
AT1G09763.1	1:29281985-29284480	COI0	38600	NOTEST	0	0	0	0	1	1	no
AT1G09767.1	1:29296513-29296851	COI0	38600	NOTEST	0	0	0	0	1	1	no
AT1G09770.1	1:3161831-3167924	COI0	38600	OK	45.0934	44.0764	-0.0329107	-0.0791717	0.92775	0.998514	no
AT1G09773.1	1:29344274-29347183	COI0	38600	NOTEST	0	0	0	0	1	1	no
AT1G09777.1	1:29347580-29352946	COI0	38600	NOTEST	0	0	0	0	1	1	no
AT1G09780.1	1:3161831-3167924	COI0	38600	OK	73.9836	60.6617	-0.286421	-0.593696	0.54455	0.998514	no
AT1G09787.1	1:29422294-29422360	COI0	38600	NOTEST	0	0	0	0	1	1	no
AT1G09790.1	1:3168433-3171018	COI0	38600	OK	1.08909	0.0650558	-4.0653	-1.87471	0.10485	0.987067	no
AT1G09793.1	1:29427764-29428566	COI0	38600	NOTEST	0	0	0	0	1	1	no
AT1G09794.1	1:3171904-3180736	COI0	38600	OK	35.9188	39.1282	0.12347	0.428062	0.6789	0.998514	no
AT1G09797.1	1:29427764-29428566	COI0	38600	OK	0.635289	1.36823	1.10683	0.966377	0.34135	0.998514	no
AT1G09800.1	1:3171904-3180736	COI0	38600	OK	14.1907	5.13239	-1.46724	-0.174663	0.3984	0.998514	no
AT1G09803.1	1:29460160-29460571	COI0	38600	NOTEST	0	0	0	0	1	1	no
AT1G09807.1	1:29466032-29466249	COI0	38600	NOTEST	0	0	0	0	1	1	no
AT1G09810.1	1:3180925-3184224	COI0	38600	OK	16.7752	19.088	0.186337	0.584811	0.5475	0.998514	no
AT1G09812.1	1:3187441-3188854	COI0	38600	OK	5.26348	4.62262	-0.187306	-0.432905	0.7186	0.998514	no
AT1G09813.1	1:29521019-29521223	COI0	38600	NOTEST	0	0	0	0	1	1	no
AT1G09815.1	1:3189300-3190242	COI0	38600	OK	26.0979	24.171	-0.110656	-0.373624	0.7536	0.998514	no
at1g09817	1:29523981-29526363	COI0	38600	NOTEST	0	0	0	0	1	1	no
AT1G09820.1	1:3190253-3192488	COI0	38600	OK	4.50708	4.63325	0.0398344	0.122108	0.923	0.998514	no
AT1G09823.1	1:29549539-29560912	COI0	38600	NOTEST	0	0.896232	inf	0	1	1	no
AT1G09827.1	1:29549539-29560912	COI0	38600	OK	1.346	1.7913	0.412333	0.0254399	0.19645	0.998514	no
AT1G09830.1	1:3192567-3195044	COI0	38600	OK	33.0085	39.069	0.243185	0.949595	0.3894	0.998514	no
AT1G09833.1	1:29646002-29649951	COI0	38600	NOTEST	0.43958	0.56961	0.373849	0	1	1	no
AT1G09837.1	1:29665165-29671341	COI0	38600	OK	9.13005	23.4502	1.36091	0.18944	0.39	0.998514	no
AT1G09840.1	1:3195718-3200403	COI0	38600	OK	30.2046	28.4012	-0.088814	-0.306708	0.75475	0.998514	no
AT1G09843.1	1:29735951-29740179	COI0	38600	OK	87.471	124.303	0.506988	0.0159564	0.0822	0.921304	no
AT1G09847.1	1:29769083-29769618	COI0	38600	NOTEST	0	0	0	0	1	1	no
AT1G09850.1	1:3201684-3205411	COI0	38600	OK	19.121	35.7616	0.903257	3.83972	0.00285	0.178128	no
AT1G09853.1	1:29769083-29769618	COI0	38600	NOTEST	0	0	0	0	1	1	no
AT1G09857.1	1:29770175-29770459	COI0	38600	NOTEST	0	0	0	0	1	1	no
AT1G09860.1	1:3201684-3205411	COI0	38600	NOTEST	0	0	0	0	1	1	no
AT1G09870.1	1:3205578-3213468	COI0	38600	OK	23.9343	21.9532	-0.124646	-0.473145	0.6852	0.998514	no
AT1G09880.1	1:3205578-3213468	COI0	38600	OK	2.64835	1.19131	-1.15255	-1.04783	0.28085	0.998514	no
AT1G09887.1	1:29919974-29923128	COI0	38600	OK	0	2.74942	inf	#NAME?	0.2188	0.998514	no
AT1G09890.2	1:3214048-3217603	COI0	38600	OK	1.49383	1.92649	0.366964	0.610188	0.516	0.998514	no
AT1G09893.1	1:29924022-29938856	COI0	38600	NOTEST	0	0	0	0	1	1	no
AT1G09897.1	1:29975666-29979356	COI0	38600	NOTEST	0	0	0	0	1	1	no
AT1G09900.1	1:3218132-3219929	COI0	38600	OK	26.2568	36.0857	0.458735	2.31946	0.12015	0.998514	no
AT1G09903.1	1:29975666-29979356	COI0	38600	NOTEST	0	0	0	0	1	1	no
AT1G09907.1	1:29985045-29993766	COI0	38600	OK	0.930689	0	#NAME?	#NAME?	0.1647	0.998514	no
AT1G09910.1	1:3220034-3224541	COI0	38600	OK	10.0028	8.54591	-0.227103	-0.678837	0.4977	0.998514	no
AT1G09913.1	1:29994961-29999045	COI0	38600	OK	0	1.29756	inf	#NAME?	0.2208	0.998514	no
AT1G09917.1	1:30019743-30033907	COI0	38600	NOTEST	0	0	0	0	1	1	no
AT1G09920.1	1:3224683-3227083	COI0	38600	OK	36.2628	43.94	0.277043	1.22018	0.36505	0.998514	no
AT1G09923.1	1:30019743-30033907	COI0	38600	NOTEST	0	0	0	0	1	1	no
AT1G09930.1	1:3227489-3230257	COI0	38600	NOTEST	0.669161	0.370675	-0.852198	0	1	1	no
AT1G09932.1	1:3230449-3233259	COI0	38600	OK	7.14323	5.88107	-0.280498	-0.615969	0.53235	0.998514	no
AT1G09935.1	1:3233923-3235530	COI0	38600	NOTEST	0.114928	0.136877	0.252157	0	1	1	no
AT1G09937.1	1:30080954-30081258	COI0	38600	NOTEST	0	0	0	0	1	1	no
AT1G09940.1	1:3236907-3239554	COI0	38600	OK	10.5221	13.2965	0.337629	1.25926	0.30325	0.998514	no
AT1G09947.1	1:30085749-30092239	COI0	38600	NOTEST	0	0	0	0	1	1	no
AT1G09950.1	1:3240530-3241863	COI0	38600	OK	0.741974	1.18352	0.673649	0.842704	0.41945	0.998514	no
AT1G09953.1	1:30145385-30145878	COI0	38600	NOTEST	0	0	0	0	1	1	no
AT1G09957.1	1:30145385-30145878	COI0	38600	NOTEST	0	0	0	0	1	1	no
AT1G09960.1	1:3243985-3247216	COI0	38600	OK	5.42261	5.08661	-0.0922831	-0.278946	0.8191	0.998514	no
AT1G09963.1	1:30225175-30235087	COI0	38600	OK	1.7688	2.38267	0.429807	0.0605233	0.5195	0.998514	no
AT1G09967.1	1:30239644-30239969	COI0	38600	NOTEST	0	0	0	0	1	1	no
AT1G09970.1	1:3252097-3255782	COI0	38600	OK	82.7222	76.8188	-0.106815	-0.352615	0.7205	0.998514	no
AT1G09973.1	1:30239644-30239969	COI0	38600	NOTEST	0	0	0	0	1	1	no
AT1G09977.1	1:30275758-30277278	COI0	38600	NOTEST	0	0	0	0	1	1	no
AT1G09980.1	1:3256188-3261741	COI0	38600	OK	16.7688	15.9275	-0.0742586	-0.256623	0.79625	0.998514	no
AT1G09983.1	1:30297613-30297846	COI0	38600	NOTEST	0	0	0	0	1	1	no
AT1G09987.1	1:30383560-30387602	COI0	38600	OK	5.29623	2.65502	-0.996239	-0.804823	0.41895	0.998514	no
AT1G09993.1	1:30397127-30400399	COI0	38600	NOTEST	0.706925	0.272801	-1.37371	0	1	1	no
AT1G09995.1	1:3262221-3263642	COI0	38600	OK	4.44012	5.30806	0.257585	0.409809	0.67445	0.998514	no
AT1G09997.1	1:30410584-30419047	COI0	38600	NOTEST	0	0	0	0	1	1	no
AT1G10000.1	1:3263849-3265176	COI0	38600	OK	1.01783	0.726538	-0.486383	-0.598642	0.5579	0.998514	no
AT1G10010.2	1:3265885-3268823	COI0	38600	NOTEST	0	0.0727333	inf	0	1	1	no
AT1G10020.1	1:3269538-3272110	COI0	38600	OK	10.1906	8.52289	-0.257821	-0.773398	0.42895	0.998514	no
AT1G10030.1	1:3273752-3278779	COI0	38600	OK	10.7446	12.0108	0.160725	0.530653	0.7553	0.998514	no
AT1G10040.1	1:3273752-3278779	COI0	38600	OK	3.77822	3.25644	-0.214413	-0.371933	0.69865	0.998514	no
AT1G10050.1	1:3278791-3283631	COI0	38600	OK	5.20184	5.15884	-0.011975	-0.0344179	0.97055	0.998514	no
AT1G10060.1	1:3284072-3287292	COI0	38600	OK	15.9785	15.5509	-0.0391308	-0.124049	0.8999	0.998514	no
AT1G10070.1	1:3288086-3296198	COI0	38600	OK	9.53435	10.6767	0.163263	0.43262	0.6983	0.998514	no
AT1G10090.1	1:3288086-3296198	COI0	38600	OK	5.54382	7.98077	0.525648	1.16901	0.2302	0.998514	no
AT1G10095.1	1:3296515-3300516	COI0	38600	OK	6.29242	6.22854	-0.0147218	-0.0330349	0.97115	0.998514	no
AT1G10100.1	1:3300696-3301489	COI0	38600	NOTEST	0	0	0	0	1	1	no
AT1G10110.1	1:3302563-3303938	COI0	38600	NOTEST	0.118694	0	#NAME?	0	1	1	no
AT1G10120.1	1:3304038-3306956	COI0	38600	OK	17.8536	17.3563	-0.0407521	-0.177003	0.8925	0.998514	no
AT1G10130.1	1:3310929-3322269	COI0	38600	OK	24.7009	24.8209	0.00698713	0.0341234	0.98145	0.998514	no
AT1G10140.1	1:3322553-3323735	COI0	38600	OK	12.3734	14.1222	0.190723	0.654618	0.60535	0.998514	no
AT1G10150.1	1:3325798-3328448	COI0	38600	NOTEST	0	0	0	0	1	1	no
AT1G10155.1	1:3325798-3328448	COI0	38600	OK	18.4155	19.7005	0.097313	0.325115	0.7413	0.998514	no
AT1G10170.1	1:3333503-3341628	COI0	38600	OK	33.3104	34.1094	0.0341971	0.112339	0.90575	0.998514	no
AT1G10190.1	1:3343685-3345632	COI0	38600	NOTEST	0	0	0	0	1	1	no
AT1G10200.1	1:3346382-3348139	COI0	38600	OK	63.3076	56.4623	-0.165091	-0.581401	0.55485	0.998514	no
AT1G10210.1	1:3349081-3351180	COI0	38600	OK	11.7717	8.02547	-0.552664	-1.42981	0.14645	0.998514	no
AT1G10220.1	1:3351922-3353122	COI0	38600	NOTEST	0.505462	0.411479	-0.296784	0	1	1	no
AT1G10225.1	1:3354242-3354856	COI0	38600	NOTEST	0.459214	0.289775	-0.664237	0	1	1	no
AT1G10230.1	1:3355674-3356151	COI0	38600	OK	37.8111	26.6476	-0.504804	-2.3433	0.2518	0.998514	no
AT1G10240.1	1:3356626-3359853	COI0	38600	OK	7.16783	8.57274	0.258221	0.737184	0.4562	0.998514	no
AT1G10250.1	1:3360086-3360508	COI0	38600	NOTEST	0	0	0	0	1	1	no
AT1G10270.1	1:3363431-3369125	COI0	38600	OK	6.52897	7.48027	0.196234	0.487155	0.5554	0.998514	no
AT1G10280.1	1:3363431-3369125	COI0	38600	OK	3.50732	5.02135	0.517706	0.780763	0.4283	0.998514	no
AT1G10290.1	1:3370401-3377463	COI0	38600	OK	27.621	31.4806	0.188695	0.605454	0.4966	0.998514	no
AT1G10300.1	1:3377877-3380414	COI0	38600	OK	0.832104	0.785784	-0.0826299	-0.0986959	0.9144	0.998514	no
AT1G10310.1	1:3381446-3384003	COI0	38600	OK	24.6052	28.5427	0.214158	0.834665	0.49805	0.998514	no
AT1G10320.1	1:3384117-3388376	COI0	38600	OK	13.2666	12.4759	-0.0886642	-0.296047	0.75885	0.998514	no
AT1G10330.1	1:3388598-3390150	COI0	38600	OK	1.32418	0.842148	-0.652954	-1.26915	0.45875	0.998514	no
AT1G10340.1	1:3390321-3392633	COI0	38600	OK	1.56913	1.15865	-0.437527	-0.685893	0.4817	0.998514	no
AT1G10350.1	1:3392942-3395181	COI0	38600	OK	7.38573	8.18223	0.147753	0.415886	0.6701	0.998514	no
AT1G10360.1	1:3395550-3398358	COI0	38600	OK	139.33	236.344	0.76238	2.80264	0.00775	0.318638	no
AT1G10380.1	1:3400553-3402420	COI0	38600	OK	19.4576	20.842	0.099164	0.309583	0.74695	0.998514	no
AT1G10385.1	1:3403131-3405920	COI0	38600	NOTEST	0.400107	0.0358114	-3.48189	0	1	1	no
AT1G10390.1	1:3406955-3412874	COI0	38600	OK	36.5955	39.7483	0.119227	0.406661	0.6686	0.998514	no
AT1G10395.1	1:3406955-3412874	COI0	38600	OK	0	3.09862	inf	#NAME?	0.1561	0.998514	no
AT1G10400.1	1:3414822-3419691	COI0	38600	OK	31.6037	29.2059	-0.113833	-0.401506	0.67865	0.998514	no
AT1G10417.1	1:3424185-3427531	COI0	38600	NOTEST	0.518759	0.344597	-0.590155	0	1	1	no
AT1G10430.1	1:3428477-3430924	COI0	38600	OK	38.394	40.2935	0.0696669	0.237354	0.80925	0.998514	no
AT1G10440.1	1:3431184-3431256	COI0	38600	NOTEST	0	0	0	0	1	1	no
AT1G10450.1	1:3431763-3438370	COI0	38600	OK	16.1183	19.8292	0.298924	1.05437	0.28665	0.998514	no
AT1G10455.1	1:3438554-3439013	COI0	38600	NOTEST	0	0	0	0	1	1	no
AT1G10460.1	1:3439029-3440359	COI0	38600	OK	1.78014	0.824234	-1.11087	-1.75479	0.18825	0.998514	no
AT1G10470.1	1:3441987-3444360	COI0	38600	OK	63.9402	47.4446	-0.430479	-1.49078	0.1265	0.998514	no
AT1G10480.1	1:3449566-3451226	COI0	38600	OK	1.90535	1.56542	-0.283501	-0.623618	0.6904	0.998514	no
AT1G10490.1	1:3453190-3461485	COI0	38600	OK	18.892	21.8675	0.211018	0.686239	0.59195	0.998514	no
AT1G10500.1	1:3453190-3461485	COI0	38600	OK	79.0294	88.2629	0.159416	0.407343	0.67965	0.998514	no
AT1G10510.1	1:3461634-3465786	COI0	38600	OK	38.5279	53.7435	0.480187	2.0763	0.09305	0.956427	no
AT1G10520.1	1:3465925-3469455	COI0	38600	OK	1.81538	1.49614	-0.279028	-0.460439	0.6459	0.998514	no
AT1G10522.1	1:3469511-3472674	COI0	38600	OK	24.23	38.3684	0.663124	2.70278	0.03895	0.709097	no
AT1G10530.1	1:3469511-3472674	COI0	38600	NOTEST	0.229179	0.369214	0.68798	0	1	1	no
AT1G10540.1	1:3474857-3478028	COI0	38600	OK	5.45476	2.92955	-0.896835	-1.8524	0.06415	0.853729	no
AT1G10550.1	1:3479065-3481041	COI0	38600	OK	4.90567	2.76846	-0.825369	-1.72923	0.13865	0.998514	no
AT1G10560.1	1:3484398-3486965	COI0	38600	NOTEST	0.298439	0.236664	-0.334595	0	1	1	no
AT1G10570.1	1:3487385-3495244	COI0	38600	OK	18.1279	16.7276	-0.115982	-0.277928	0.81725	0.998514	no
AT1G10580.1	1:3487385-3495244	COI0	38600	OK	38.7808	33.3706	-0.216765	-0.503638	0.57095	0.998514	no
AT1G10586.1	1:3496910-3499439	COI0	38600	NOTEST	0.198125	0.230001	0.215227	0	1	1	no
AT1G10588.1	1:3501144-3501904	COI0	38600	NOTEST	0	0	0	0	1	1	no
AT1G10590.1	1:3501987-3503544	COI0	38600	OK	92.1629	77.7988	-0.244437	-0.861643	0.37885	0.998514	no
AT1G10600.1	1:3503639-3512321	COI0	38600	OK	32.524	29.9919	-0.116929	-0.507459	0.718	0.998514	no
AT1G10620.1	1:3503639-3512321	COI0	38600	NOTEST	0.0247222	0	#NAME?	0	1	1	no
AT1G10630.1	1:3512738-3518035	COI0	38600	OK	55.6751	50.0823	-0.152731	-0.551263	0.70745	0.998514	no
AT1G10640.1	1:3512738-3518035	COI0	38600	OK	28.2439	25.4203	-0.151958	-0.407161	0.68075	0.998514	no
AT1G10650.1	1:3523985-3526531	COI0	38600	OK	38.8105	34.6099	-0.165261	-0.572796	0.56	0.998514	no
AT1G10657.1	1:3530352-3532017	COI0	38600	OK	32.7734	22.1187	-0.567261	-1.68623	0.0893	0.942944	no
AT1G10660.1	1:3532228-3535137	COI0	38600	OK	32.295	33.2731	0.0430449	0.149066	0.88065	0.998514	no
AT1G10670.1	1:3535287-3543925	COI0	38600	OK	136.075	139.235	0.0331136	0.132166	0.9055	0.998514	no
AT1G10680.1	1:3535287-3543925	COI0	38600	NOTEST	0.0501454	0.0195499	-1.35896	0	1	1	no
AT1G10682.1	1:3544912-3545614	COI0	38600	OK	73.6136	36.4524	-1.01396	-4.94304	0.0022	0.152925	no
AT1G10690.1	1:3549919-3550848	COI0	38600	OK	3.34544	3.65899	0.129248	0.225868	0.82805	0.998514	no
AT1G10700.1	1:3554103-3556544	COI0	38600	OK	14.6268	16.9281	0.210802	0.628207	0.52465	0.998514	no
AT1G10710.1	1:3558357-3560705	COI0	38600	OK	0.703561	0.0876142	-3.00544	-1.37155	0.1	0.977698	no
AT1G10715.1	1:3561148-3561495	COI0	38600	NOTEST	0	0	0	0	1	1	no
AT1G10717.1	1:3562179-3562554	COI0	38600	NOTEST	0	0	0	0	1	1	no
AT1G10720.1	1:3562840-3564850	COI0	38600	OK	12.5705	11.4795	-0.130986	-0.500229	0.6997	0.998514	no
AT1G10730.1	1:3565256-3571053	COI0	38600	OK	10.4355	9.27883	-0.169485	-0.23966	0.8338	0.998514	no
AT1G10740.1	1:3565256-3571053	COI0	38600	OK	43.6029	74.7262	0.777188	2.56716	0.00835	0.334659	no
AT1G10745.1	1:3572673-3573173	COI0	38600	NOTEST	0	0	0	0	1	1	no
AT1G10747.1	1:3574311-3578783	COI0	38600	NOTEST	0.318316	0	#NAME?	0	1	1	no
AT1G10750.1	1:3574311-3578783	COI0	38600	OK	3.02695	4.68649	0.630641	1.41026	0.14925	0.998514	no
AT1G10760.1	1:3580829-3590928	COI0	38600	OK	21.3752	32.4455	0.602078	2.12363	0.02845	0.622685	no
AT1G10770.1	1:3591632-3592580	COI0	38600	OK	3.29618	0.10554	-4.96493	-3.4556	0.1188	0.998514	no
[truncated: 28,883 more rows]

## Sheet: Sorted Genes
Genes	Locus	Control	Treatment	Status	FPKM_Control	FPKM_Treatment	log2(fold_change)	test_stat	p_value	q_value	significant
AT1G01980.1	1:340107-342040	COI0	38600	OK	0.807174	0	#NAME?	#NAME?	5e-05	0.00838689	yes
AT1G02790.1	1:610362-612324	COI0	38600	OK	52.5477	0	#NAME?	#NAME?	5e-05	0.00838689	yes
AT1G05580.1	1:1665355-1668924	COI0	38600	OK	0.923277	0	#NAME?	#NAME?	5e-05	0.00838689	yes
AT1G11260.1	1:3777235-3787099	COI0	38600	OK	39.4435	90.5017	1.19816	4.59302	5e-05	0.00838689	yes
AT1G13650.1	1:4680289-4682382	COI0	38600	OK	12.5749	62.1236	2.3046	7.39309	5e-05	0.00838689	yes
AT1G14200.1	1:4852521-4855287	COI0	38600	OK	27.4316	5.78868	-2.24453	-5.08899	5e-05	0.00838689	yes
AT1G15670.1	1:5389951-5391672	COI0	38600	OK	42.6509	15.4459	-1.46535	-6.15868	5e-05	0.00838689	yes
AT1G16360.1	1:5593269-5595814	COI0	38600	OK	1.19376	0	#NAME?	#NAME?	5e-05	0.00838689	yes
AT1G17710.1	1:6090404-6092027	COI0	38600	OK	45.1552	17.8628	-1.33794	-3.9884	5e-05	0.00838689	yes
AT1G20190.1	1:6998334-6999839	COI0	38600	OK	34.534	10.7771	-1.68005	-4.87123	5e-05	0.00838689	yes
AT1G21270.1	1:7444748-7448483	COI0	38600	OK	15.096	4.57748	-1.72155	-5.35944	5e-05	0.00838689	yes
AT1G21310.1	1:7453244-7455009	COI0	38600	OK	28.6623	9.81912	-1.54549	-3.51558	5e-05	0.00838689	yes
AT1G23240.1	1:8252701-8254637	COI0	38600	OK	13.677	0	#NAME?	#NAME?	5e-05	0.00838689	yes
AT1G23690.1	1:8377261-8378769	COI0	38600	OK	1.24826	0	#NAME?	#NAME?	5e-05	0.00838689	yes
AT1G23870.1	1:8432178-8440866	COI0	38600	OK	16.3517	41.2803	1.33602	4.77649	5e-05	0.00838689	yes
AT1G25550.1	1:8976325-8978305	COI0	38600	OK	41.5369	97.8263	1.23583	4.36432	5e-05	0.00838689	yes
AT1G26330.1	1:9107518-9113747	COI0	38600	OK	11.0251	1.43209	-2.9446	-7.20507	5e-05	0.00838689	yes
AT1G27020.1	1:9378403-9380790	COI0	38600	OK	78.2274	22.0414	-1.82746	-8.07718	5e-05	0.00838689	yes
AT1G28000.1	1:9756673-9757963	COI0	38600	OK	0	2.66437	inf	#NAME?	5e-05	0.00838689	yes
AT1G28270.1	1:9882950-9884189	COI0	38600	OK	1.85885	0	#NAME?	#NAME?	5e-05	0.00838689	yes
AT1G28660.1	1:10071608-10073549	COI0	38600	OK	48.5696	22.1284	-1.13415	-3.81822	5e-05	0.00838689	yes
AT1G29140.1	1:10178901-10180225	COI0	38600	OK	9.65717	0	#NAME?	#NAME?	5e-05	0.00838689	yes
AT1G30350.1	1:10709998-10711667	COI0	38600	OK	2.73124	0	#NAME?	#NAME?	5e-05	0.00838689	yes
AT1G30795.1	1:10935683-10936396	COI0	38600	OK	6.9039	0	#NAME?	#NAME?	5e-05	0.00838689	yes
AT1G32300.1	1:11651326-11653380	COI0	38600	OK	0.831784	0	#NAME?	#NAME?	5e-05	0.00838689	yes
AT1G35140.1	1:12851982-12853235	COI0	38600	OK	5.50586	21.9055	1.99225	4.76027	5e-05	0.00838689	yes
AT1G35490.1	1:13061548-13063455	COI0	38600	OK	2.56006	0	#NAME?	#NAME?	5e-05	0.00838689	yes
AT1G47980.1	1:17691810-17693887	COI0	38600	OK	59.6476	10.9833	-2.44115	-9.14069	5e-05	0.00838689	yes
AT1G52680.1	1:19618098-19619026	COI0	38600	OK	8.08062	0	#NAME?	#NAME?	5e-05	0.00838689	yes
AT1G54860.1	1:20457256-20458631	COI0	38600	OK	1.98494	0	#NAME?	#NAME?	5e-05	0.00838689	yes
AT1G54870.2	1:20458951-20460647	COI0	38600	OK	1.72085	0	#NAME?	#NAME?	5e-05	0.00838689	yes
AT1G55570.1	1:20757766-20760268	COI0	38600	OK	7.28651	0	#NAME?	#NAME?	5e-05	0.00838689	yes
AT1G55960.1	1:20927642-20930209	COI0	38600	OK	76.6637	197.54	1.36553	4.57615	5e-05	0.00838689	yes
AT1G58270.1	1:21611802-21614169	COI0	38600	OK	13.294	36.0768	1.4403	6.40896	5e-05	0.00838689	yes
AT1G61563.1	1:22714920-22717610	COI0	38600	OK	71.0056	0	#NAME?	#NAME?	5e-05	0.00838689	yes
AT1G61566.1	1:22714920-22717610	COI0	38600	OK	60.1689	0	#NAME?	#NAME?	5e-05	0.00838689	yes
AT1G62450.1	1:23115535-23117594	COI0	38600	OK	1.26945	0	#NAME?	#NAME?	5e-05	0.00838689	yes
AT1G63060.1	1:23383970-23385109	COI0	38600	OK	3.08308	0	#NAME?	#NAME?	5e-05	0.00838689	yes
AT1G70290.1	1:26470794-26474833	COI0	38600	OK	42.5612	135.877	1.67469	5.69399	5e-05	0.00838689	yes
AT1G71680.1	1:26944586-26947219	COI0	38600	OK	2.66767	0	#NAME?	#NAME?	5e-05	0.00838689	yes
AT1G73010.1	1:27464527-27466348	COI0	38600	OK	57.5061	21.9594	-1.38888	-5.64096	5e-05	0.00838689	yes
AT1G73260.1	1:27547097-27548282	COI0	38600	OK	91.3224	37.2545	-1.29356	-6.19416	5e-05	0.00838689	yes
AT1G73480.1	1:27628677-27632840	COI0	38600	OK	15.6339	37.4654	1.26088	5.02706	5e-05	0.00838689	yes
AT1G75870.1	1:28486228-28487443	COI0	38600	OK	1.16051	0	#NAME?	#NAME?	5e-05	0.00838689	yes
AT1G76930.1	1:28895300-28897120	COI0	38600	OK	55.34	19.5601	-1.50041	-5.16069	5e-05	0.00838689	yes
AT2G05510.1	2:2015623-2016772	COI0	38600	OK	326.899	113.293	-1.52879	-4.85489	5e-05	0.00838689	yes
AT2G07040.1	2:2916415-2919392	COI0	38600	OK	1.08334	0	#NAME?	#NAME?	5e-05	0.00838689	yes
AT2G07560.1	2:3169907-3174102	COI0	38600	OK	10.3588	0	#NAME?	#NAME?	5e-05	0.00838689	yes
AT2G14560.3	2:6213616-6215932	COI0	38600	OK	63.42	16.6014	-1.93363	-5.9957	5e-05	0.00838689	yes
AT2G14610.1	2:6241639-6242541	COI0	38600	OK	35.3593	4.88796	-2.85478	-8.11053	5e-05	0.00838689	yes
AT2G15880.1	2:6917513-6922161	COI0	38600	OK	13.7485	38.2841	1.47747	4.13432	5e-05	0.00838689	yes
AT2G16060.1	2:6982530-6983777	COI0	38600	OK	31.1681	3.51622	-3.14797	-8.1022	5e-05	0.00838689	yes
AT2G18328.1	2:7964325-7964995	COI0	38600	OK	95.1511	21.255	-2.16242	-9.44118	5e-05	0.00838689	yes
AT2G18700.1	2:8108897-8112010	COI0	38600	OK	15.4928	42.9176	1.46997	6.44957	5e-05	0.00838689	yes
AT2G19770.1	2:8519484-8521275	COI0	38600	OK	2.3577	0	#NAME?	#NAME?	5e-05	0.00838689	yes
AT2G20870.1	2:8981926-8982712	COI0	38600	OK	285.679	88.3664	-1.69283	-5.85272	5e-05	0.00838689	yes
AT2G21510.1	2:9210622-9213102	COI0	38600	OK	1.34954	0	#NAME?	#NAME?	5e-05	0.00838689	yes
AT2G22950.1	2:9766057-9769957	COI0	38600	OK	0.95144	0	#NAME?	#NAME?	5e-05	0.00838689	yes
AT2G23900.1	2:10174514-10176858	COI0	38600	OK	0.882666	0	#NAME?	#NAME?	5e-05	0.00838689	yes
AT2G26410.1	2:11234266-11236995	COI0	38600	OK	1.17746	0	#NAME?	#NAME?	5e-05	0.00838689	yes
AT2G26980.1	2:11514599-11518734	COI0	38600	OK	49.7836	108.763	1.12744	3.909	5e-05	0.00838689	yes
AT2G28190.1	2:12014411-12016569	COI0	38600	OK	36.8273	97.5521	1.4054	5.2231	5e-05	0.00838689	yes
AT2G28355.1	2:12119284-12120512	COI0	38600	OK	4.8775	0	#NAME?	#NAME?	5e-05	0.00838689	yes
AT2G32230.1	2:13679528-13682333	COI0	38600	OK	37.9002	82.5579	1.1232	3.98235	5e-05	0.00838689	yes
AT2G38310.1	2:16049917-16051356	COI0	38600	OK	119.289	54.019	-1.14292	-5.34848	5e-05	0.00838689	yes
AT2G39800.1	2:16596837-16603319	COI0	38600	OK	86.8227	316.377	1.8655	5.50684	5e-05	0.00838689	yes
AT2G45180.1	2:18626187-18627157	COI0	38600	OK	297.763	120.648	-1.30336	-9.3947	5e-05	0.00838689	yes
AT2G46440.1	2:19061687-19064937	COI0	38600	OK	16.3539	5.40751	-1.59659	-4.66777	5e-05	0.00838689	yes
AT2G46670.1	2:19164356-19166967	COI0	38600	OK	35.6164	88.3623	1.31089	4.61162	5e-05	0.00838689	yes
AT2G47030.1	2:19324133-19326484	COI0	38600	OK	2.78624	0	#NAME?	#NAME?	5e-05	0.00838689	yes
AT3G01240.1	3:78094-79037	COI0	38600	OK	12.6625	0	#NAME?	#NAME?	5e-05	0.00838689	yes
AT3G01270.1	3:82580-84901	COI0	38600	OK	13.7984	0	#NAME?	#NAME?	5e-05	0.00838689	yes
AT3G01700.1	3:258878-259631	COI0	38600	OK	4.33861	0	#NAME?	#NAME?	5e-05	0.00838689	yes
AT3G02550.1	3:536499-538126	COI0	38600	OK	32.9135	5.00732	-2.71657	-8.34078	5e-05	0.00838689	yes
AT3G03430.1	3:814180-814888	COI0	38600	OK	3.51462	0	#NAME?	#NAME?	5e-05	0.00838689	yes
AT3G03540.1	3:846220-848297	COI0	38600	OK	0.881938	0	#NAME?	#NAME?	5e-05	0.00838689	yes
AT3G05610.1	3:1625527-1628175	COI0	38600	OK	0.999319	0	#NAME?	#NAME?	5e-05	0.00838689	yes
AT3G05955.1	3:11586004-11586548	COI0	38600	OK	0	4.71199	inf	#NAME?	5e-05	0.00838689	yes
AT3G05960.1	3:1783387-1785495	COI0	38600	OK	2.0214	0	#NAME?	#NAME?	5e-05	0.00838689	yes
AT3G07820.1	3:2496330-2498095	COI0	38600	OK	9.33301	0	#NAME?	#NAME?	5e-05	0.00838689	yes
AT3G08560.1	3:2600090-2601907	COI0	38600	OK	5.35072	0	#NAME?	#NAME?	5e-05	0.00838689	yes
AT3G09530.1	3:2926041-2928569	COI0	38600	OK	1.31096	0	#NAME?	#NAME?	5e-05	0.00838689	yes
AT3G11980.1	3:3814230-3817117	COI0	38600	OK	27.0982	8.49775	-1.67305	-6.03562	5e-05	0.00838689	yes
AT3G12000.1	3:3818045-3819642	COI0	38600	OK	4.89752	0	#NAME?	#NAME?	5e-05	0.00838689	yes
AT3G13750.1	3:4510964-4516478	COI0	38600	OK	34.1719	113.01	1.72556	6.00603	5e-05	0.00838689	yes
AT3G14200.1	3:4712573-4714698	COI0	38600	OK	38.5041	13.7377	-1.48688	-5.38924	5e-05	0.00838689	yes
AT3G16670.1	3:5681379-5682362	COI0	38600	OK	213.704	62.0451	-1.78423	-8.14043	5e-05	0.00838689	yes
AT3G19680.1	3:6840280-6842856	COI0	38600	OK	8.39077	26.4875	1.65843	5.19666	5e-05	0.00838689	yes
AT3G21880.1	3:7706256-7708346	COI0	38600	OK	1.26119	0	#NAME?	#NAME?	5e-05	0.00838689	yes
AT3G21990.1	3:7749246-7750602	COI0	38600	OK	3.08405	0	#NAME?	#NAME?	5e-05	0.00838689	yes
AT3G22840.1	3:8084404-8085669	COI0	38600	OK	51.5151	139.842	1.44073	6.58834	5e-05	0.00838689	yes
AT3G23150.1	3:8254558-8257888	COI0	38600	OK	23.2473	9.18124	-1.3403	-4.34623	5e-05	0.00838689	yes
AT3G24520.1	3:8937381-8942874	COI0	38600	OK	8.22905	24.1596	1.5538	4.86506	5e-05	0.00838689	yes
AT3G25050.1	3:9126850-9130452	COI0	38600	OK	19.8035	4.15322	-2.25346	-6.02938	5e-05	0.00838689	yes
AT3G26110.1	3:9541482-9542164	COI0	38600	OK	2.8712	0	#NAME?	#NAME?	5e-05	0.00838689	yes
AT3G27416.1	3:10147065-10147992	COI0	38600	OK	4.80391	0	#NAME?	#NAME?	5e-05	0.00838689	yes
AT3G28270.1	3:10538004-10540070	COI0	38600	OK	41.0123	128.092	1.64305	5.76633	5e-05	0.00838689	yes
AT3G28780.1	3:10805856-10808461	COI0	38600	OK	5.8527	0	#NAME?	#NAME?	5e-05	0.00838689	yes
AT3G28980.1	3:10993116-10995006	COI0	38600	OK	38.0005	0	#NAME?	#NAME?	5e-05	0.00838689	yes
AT3G29040.1	3:11037300-11038746	COI0	38600	OK	1.00235	0	#NAME?	#NAME?	5e-05	0.00838689	yes
AT3G29575.1	3:11382213-11384145	COI0	38600	OK	12.9701	42.31	1.70581	5.18755	5e-05	0.00838689	yes
AT3G43120.1	3:15094047-15095989	COI0	38600	OK	1.86692	0	#NAME?	#NAME?	5e-05	0.00838689	yes
AT3G44300.1	3:15983198-15985535	COI0	38600	OK	81.9044	38.7499	-1.07975	-4.48439	5e-05	0.00838689	yes
AT3G47340.1	3:17437839-17441567	COI0	38600	OK	13.0731	39.7443	1.60415	5.47809	5e-05	0.00838689	yes
AT3G48360.1	3:17907766-17910738	COI0	38600	OK	17.7995	215.415	3.59722	11.4566	5e-05	0.00838689	yes
AT3G49540.1	3:18365677-18366666	COI0	38600	OK	8.19591	0	#NAME?	#NAME?	5e-05	0.00838689	yes
AT3G55240.1	3:20473334-20475332	COI0	38600	OK	33.7892	6.13455	-2.46153	-9.68226	5e-05	0.00838689	yes
AT3G57020.1	3:21098314-21100519	COI0	38600	OK	36.2784	92.0733	1.34367	4.75176	5e-05	0.00838689	yes
AT3G57520.1	3:21288741-21293171	COI0	38600	OK	27.4053	103.621	1.9188	6.57375	5e-05	0.00838689	yes
AT3G59455.1	3:21976745-21977393	COI0	38600	OK	4.91066	0	#NAME?	#NAME?	5e-05	0.00838689	yes
AT3G62170.1	3:23016173-23018509	COI0	38600	OK	14.8339	0	#NAME?	#NAME?	5e-05	0.00838689	yes
AT3G62180.2	3:23019583-23020598	COI0	38600	OK	7.82143	0	#NAME?	#NAME?	5e-05	0.00838689	yes
AT3G62230.1	3:23031530-23033146	COI0	38600	OK	7.60051	0	#NAME?	#NAME?	5e-05	0.00838689	yes
AT4G01470.1	4:624785-625885	COI0	38600	OK	3.07691	0	#NAME?	#NAME?	5e-05	0.00838689	yes
AT4G01950.1	4:844341-846814	COI0	38600	OK	9.19864	26.6203	1.53303	4.71454	5e-05	0.00838689	yes
AT4G04077.1	4:1961125-1961951	COI0	38600	OK	4.63706	0	#NAME?	#NAME?	5e-05	0.00838689	yes
AT4G08950.1	4:5740218-5741591	COI0	38600	OK	72.5201	214.028	1.56135	5.55334	5e-05	0.00838689	yes
AT4G11030.1	4:6738067-6742424	COI0	38600	OK	1.03996	0	#NAME?	#NAME?	5e-05	0.00838689	yes
AT4G11760.1	4:7079182-7080445	COI0	38600	OK	9.56472	0	#NAME?	#NAME?	5e-05	0.00838689	yes
AT4G12470.1	4:7401086-7401951	COI0	38600	OK	302.905	89.0966	-1.76542	-10.6007	5e-05	0.00838689	yes
AT4G12480.1	4:7406064-7406994	COI0	38600	OK	57.339	20.3948	-1.49131	-4.35996	5e-05	0.00838689	yes
AT4G12870.1	4:7542232-7543549	COI0	38600	OK	42.4745	7.81267	-2.44271	-8.71642	5e-05	0.00838689	yes
AT4G14400.1	4:8294164-8299195	COI0	38600	OK	43.6284	18.5753	-1.23188	-4.29068	5e-05	0.00838689	yes
AT4G14690.1	4:8418241-8419325	COI0	38600	OK	15.5884	52.2538	1.74506	5.81774	5e-05	0.00838689	yes
AT4G16260.1	4:9199971-9201643	COI0	38600	OK	82.6174	28.1327	-1.5542	-5.35023	5e-05	0.00838689	yes
AT4G18920.1	4:10368754-10370281	COI0	38600	OK	1.47453	0	#NAME?	#NAME?	5e-05	0.00838689	yes
AT4G19160.1	4:10477183-10480212	COI0	38600	OK	40.9082	85.742	1.06761	3.77594	5e-05	0.00838689	yes
AT4G19430.1	4:10598370-10599182	COI0	38600	OK	55.8421	19.6488	-1.50691	-6.08483	5e-05	0.00838689	yes
AT4G21400.1	4:11398856-11405235	COI0	38600	OK	42.5876	13.8945	-1.61592	-5.76584	5e-05	0.00838689	yes
AT4G21630.1	4:11492247-11495538	COI0	38600	OK	3.81171	0	#NAME?	#NAME?	5e-05	0.00838689	yes
AT4G24972.1	4:12837352-12840230	COI0	38600	OK	21.3647	67.7254	1.66447	6.91284	5e-05	0.00838689	yes
AT4G25590.1	4:13058935-13060250	COI0	38600	OK	1.84278	0	#NAME?	#NAME?	5e-05	0.00838689	yes
AT4G25950.1	4:13173442-13174541	COI0	38600	OK	2.45215	0	#NAME?	#NAME?	5e-05	0.00838689	yes
AT4G27520.1	4:13750155-13752103	COI0	38600	OK	63.678	153.879	1.27293	4.35384	5e-05	0.00838689	yes
AT4G28230.1	4:13992209-13998604	COI0	38600	OK	169.578	62.6786	-1.4359	-4.4369	5e-05	0.00838689	yes
AT4G29905.1	4:14626920-14627631	COI0	38600	OK	83.2043	373.745	2.16732	11.8718	5e-05	0.00838689	yes
AT4G32480.1	4:15676239-15677977	COI0	38600	OK	68.7167	147.54	1.10238	3.9723	5e-05	0.00838689	yes
AT4G32714.1	4:15784587-15785340	COI0	38600	OK	8.8488	0	#NAME?	#NAME?	5e-05	0.00838689	yes
AT4G35720.1	4:16927729-16929224	COI0	38600	OK	22.6359	6.97032	-1.69932	-6.09765	5e-05	0.00838689	yes
AT4G36490.1	4:17221884-17225421	COI0	38600	OK	0.754228	0	#NAME?	#NAME?	5e-05	0.00838689	yes
AT4G37180.1	4:17504427-17506504	COI0	38600	OK	38.2903	86.268	1.17185	4.1587	5e-05	0.00838689	yes
AT4G37540.1	4:17639392-17640925	COI0	38600	OK	40.7347	94.3052	1.21108	5.64929	5e-05	0.00838689	yes
AT4G37610.1	4:17668950-17672353	COI0	38600	OK	62.3344	133.314	1.09673	3.81769	5e-05	0.00838689	yes
AT5G02020.1	5:383152-388231	COI0	38600	OK	31.3111	98.5708	1.65449	4.94969	5e-05	0.00838689	yes
AT5G07410.1	5:2345757-2347565	COI0	38600	OK	32.9117	0	#NAME?	#NAME?	5e-05	0.00838689	yes
AT5G07510.1	5:2377702-2378829	COI0	38600	OK	22.0121	2.65554	-3.05122	-5.92272	5e-05	0.00838689	yes
AT5G07530.1	5:2382380-2384525	COI0	38600	OK	54.3062	9.23519	-2.5559	-8.32689	5e-05	0.00838689	yes
AT5G07550.1	5:2388224-2389249	COI0	38600	OK	206.52	54.1436	-1.93142	-6.54149	5e-05	0.00838689	yes
AT5G07560.1	5:2390206-2391439	COI0	38600	OK	19.0072	3.98879	-2.25252	-5.23782	5e-05	0.00838689	yes
AT5G12000.1	5:3873798-3877004	COI0	38600	OK	0.703746	0	#NAME?	#NAME?	5e-05	0.00838689	yes
AT5G13350.1	5:4279768-4282395	COI0	38600	OK	0.703473	0	#NAME?	#NAME?	5e-05	0.00838689	yes
AT5G15120.1	5:4898640-4900734	COI0	38600	OK	29.0698	1.86694	-3.96078	-9.56415	5e-05	0.00838689	yes
AT5G17300.1	5:5690224-5692992	COI0	38600	OK	40.7848	117.35	1.52472	5.4735	5e-05	0.00838689	yes
AT5G19580.1	5:6607370-6609799	COI0	38600	OK	11.9104	3.26023	-1.86917	-3.88279	5e-05	0.00838689	yes
AT5G20250.1	5:6833563-6839609	COI0	38600	OK	31.2658	87.146	1.47885	4.87022	5e-05	0.00838689	yes
AT5G20710.1	5:7010450-7014249	COI0	38600	OK	9.45727	0.896725	-3.39869	-6.98198	5e-05	0.00838689	yes
AT5G22430.1	5:7433789-7434953	COI0	38600	OK	109.721	39.0931	-1.48885	-6.46745	5e-05	0.00838689	yes
AT5G22920.1	5:7664870-7667288	COI0	38600	OK	13.0643	62.1232	2.24951	7.01217	5e-05	0.00838689	yes
AT5G24150.1	5:8172299-8175525	COI0	38600	OK	60.0818	165.371	1.46071	4.98658	5e-05	0.00838689	yes
AT5G25120.1	5:8661969-8664681	COI0	38600	OK	15.1805	35.6851	1.2331	5.46199	5e-05	0.00838689	yes
AT5G25130.1	5:8668231-8670237	COI0	38600	OK	6.95217	22.2746	1.67986	5.9053	5e-05	0.00838689	yes
AT5G33370.1	5:12602467-12604832	COI0	38600	OK	145.979	63.6509	-1.19751	-4.18059	5e-05	0.00838689	yes
AT5G37260.1	5:14751343-14753088	COI0	38600	OK	35.5201	128.646	1.85671	8.92881	5e-05	0.00838689	yes
AT5G37810.1	5:15045113-15048012	COI0	38600	OK	1.84494	0	#NAME?	#NAME?	5e-05	0.00838689	yes
AT5G39880.1	5:15970886-15972344	COI0	38600	OK	3.58339	0	#NAME?	#NAME?	5e-05	0.00838689	yes
AT5G42530.1	5:17004737-17005510	COI0	38600	OK	1207.22	494.293	-1.28825	-7.96794	5e-05	0.00838689	yes
AT5G42800.1	5:17164092-17166032	COI0	38600	OK	10.2159	28.3525	1.47266	5.39553	5e-05	0.00838689	yes
AT5G44300.1	5:17845126-17846197	COI0	38600	OK	11.2456	0	#NAME?	#NAME?	5e-05	0.00838689	yes
AT5G45880.1	5:18609627-18611166	COI0	38600	OK	15.5062	0	#NAME?	#NAME?	5e-05	0.00838689	yes
AT5G45890.1	5:18613238-18614963	COI0	38600	OK	1.91354	0	#NAME?	#NAME?	5e-05	0.00838689	yes
AT5G46650.1	5:18930245-18931312	COI0	38600	OK	1.76697	0	#NAME?	#NAME?	5e-05	0.00838689	yes
AT5G46795.1	5:18986935-18988197	COI0	38600	OK	2.61649	0	#NAME?	#NAME?	5e-05	0.00838689	yes
AT5G48140.1	5:19518665-19520528	COI0	38600	OK	1.16162	0	#NAME?	#NAME?	5e-05	0.00838689	yes
AT5G49180.1	5:19940461-19943015	COI0	38600	OK	2.42641	0	#NAME?	#NAME?	5e-05	0.00838689	yes
AT5G49360.1	5:20011811-20016857	COI0	38600	OK	23.5507	90.5446	1.94286	5.52181	5e-05	0.00838689	yes
AT5G49730.1	5:20201036-20204595	COI0	38600	OK	39.683	107.242	1.43428	4.95285	5e-05	0.00838689	yes
AT5G50830.1	5:20683261-20684890	COI0	38600	OK	1.2671	0	#NAME?	#NAME?	5e-05	0.00838689	yes
AT5G50915.1	5:20710102-20712473	COI0	38600	OK	12.151	30.0118	1.30445	4.09297	5e-05	0.00838689	yes
AT5G52360.1	5:21257933-21259408	COI0	38600	OK	2.54794	0	#NAME?	#NAME?	5e-05	0.00838689	yes
AT5G53420.1	5:21673431-21675803	COI0	38600	OK	75.2433	29.7433	-1.339	-4.59499	5e-05	0.00838689	yes
AT5G53820.1	5:21853347-21854117	COI0	38600	OK	68.692	11.5153	-2.57659	-9.69635	5e-05	0.00838689	yes
AT5G57560.1	5:23307005-23308680	COI0	38600	OK	35.4072	141.261	1.99625	8.17717	5e-05	0.00838689	yes
AT5G59120.1	5:23864671-23868083	COI0	38600	OK	0.673892	0	#NAME?	#NAME?	5e-05	0.00838689	yes
AT5G61590.1	5:24764255-24765511	COI0	38600	OK	65.0724	27.8357	-1.22511	-4.66017	5e-05	0.00838689	yes
AT5G61720.1	5:24801504-24803395	COI0	38600	OK	13.3801	0	#NAME?	#NAME?	5e-05	0.00838689	yes
AT5G63160.1	5:25333171-25335570	COI0	38600	OK	20.7158	163.649	2.9818	9.80766	5e-05	0.00838689	yes
AT5G66020.1	5:26401192-26404725	COI0	38600	OK	1.66738	0	#NAME?	#NAME?	5e-05	0.00838689	yes
AT1G20693.1	1:7176746-7178895	COI0	38600	OK	128.156	61.5737	-1.05751	-3.74694	0.0001	0.0150964	yes
AT1G22130.1	1:7812210-7814345	COI0	38600	OK	0.829041	0	#NAME?	#NAME?	0.0001	0.0150964	yes
AT1G23640.1	1:8366940-8368381	COI0	38600	OK	0.9871	0	#NAME?	#NAME?	0.0001	0.0150964	yes
AT1G26320.1	1:9105037-9107231	COI0	38600	OK	0.789301	0	#NAME?	#NAME?	0.0001	0.0150964	yes
AT1G70700.1	1:26654528-26657350	COI0	38600	OK	71.4661	152.169	1.09034	3.82115	0.0001	0.0150964	yes
AT2G16505.1	2:7156838-7157770	COI0	38600	OK	2.47341	0	#NAME?	#NAME?	0.0001	0.0150964	yes
AT2G26440.1	2:11247159-11249620	COI0	38600	OK	13.6075	5.50831	-1.30472	-3.52192	0.0001	0.0150964	yes
AT3G15400.1	3:5201621-5207574	COI0	38600	OK	74.6357	33.5292	-1.15445	-3.61937	0.0001	0.0150964	yes
AT3G21960.1	3:7736979-7738218	COI0	38600	OK	1.02508	0	#NAME?	#NAME?	0.0001	0.0150964	yes
AT3G21970.1	3:7742249-7743659	COI0	38600	OK	0.887122	0	#NAME?	#NAME?	0.0001	0.0150964	yes
AT3G26290.2	3:9632607-9634822	COI0	38600	OK	39.4386	16.656	-1.24356	-4.03718	0.0001	0.0150964	yes
AT4G39250.1	4:18271197-18272129	COI0	38600	OK	1.3034	0	#NAME?	#NAME?	0.0001	0.0150964	yes
AT5G07490.1	5:2370132-2371326	COI0	38600	OK	1.29939	0	#NAME?	#NAME?	0.0001	0.0150964	yes
AT5G17310.1	5:5696477-5700993	COI0	38600	OK	38.9276	87.5181	1.16879	4.13329	0.0001	0.0150964	yes
AT5G17480.1	5:5762599-5763202	COI0	38600	OK	3.15454	0	#NAME?	#NAME?	0.0001	0.0150964	yes
AT5G24490.1	5:8365600-8368937	COI0	38600	OK	66.0971	145.957	1.14288	4.42497	0.0001	0.0150964	yes
AT5G26060.1	5:9104729-9105525	COI0	38600	OK	1.32089	0	#NAME?	#NAME?	0.0001	0.0150964	yes
AT5G61605.1	5:24768381-24769010	COI0	38600	OK	3.49047	0	#NAME?	#NAME?	0.0001	0.0150964	yes
AT5G65640.1	5:26236963-26239219	COI0	38600	OK	48.3173	21.7466	-1.15175	-3.85028	0.0001	0.0150964	yes
AT1G30820.1	1:10944907-10949482	COI0	38600	OK	20.3995	43.2374	1.08375	4.63437	0.00015	0.0209772	yes
AT1G33760.1	1:12237546-12238710	COI0	38600	OK	0	1.38238	inf	#NAME?	0.00015	0.0209772	yes
AT1G60190.1	1:22198265-22200687	COI0	38600	OK	1.88951	6.90802	1.87026	4.10024	0.00015	0.0209772	yes
AT2G31985.1	2:13613927-13615692	COI0	38600	OK	1.27669	0	#NAME?	#NAME?	0.00015	0.0209772	yes
AT2G41445.2	2:17275469-17277607	COI0	38600	OK	0.769022	0	#NAME?	#NAME?	0.00015	0.0209772	yes
AT3G01295.1	3:872995-873346	COI0	38600	OK	0	10.2672	inf	#NAME?	0.00015	0.0209772	yes
AT3G22050.1	3:7763967-7765326	COI0	38600	OK	0.970455	0	#NAME?	#NAME?	0.00015	0.0209772	yes
AT3G49790.1	3:18467958-18469962	COI0	38600	OK	11.4729	28.6365	1.31963	5.80632	0.00015	0.0209772	yes
AT4G24640.1	4:12717787-12719287	COI0	38600	OK	1.28862	0	#NAME?	#NAME?	0.00015	0.0209772	yes
AT4G26150.1	4:13253083-13255106	COI0	38600	OK	16.1521	37.9821	1.2336	4.992	0.00015	0.0209772	yes
AT4G27300.1	4:13666075-13672413	COI0	38600	OK	66.7563	32.6018	-1.03395	-3.63301	0.00015	0.0209772	yes
AT5G48470.1	5:19641743-19644362	COI0	38600	OK	12.4298	29.3869	1.24137	4.01271	0.00015	0.0209772	yes
AT1G52030.1	1:19345870-19349088	COI0	38600	OK	36.6149	17.582	-1.05834	-3.66318	0.0002	0.0264611	yes
AT2G22990.1	2:9786086-9790335	COI0	38600	OK	80.0288	168.415	1.07343	3.66415	0.0002	0.0264611	yes
AT3G48460.1	3:17949415-17951250	COI0	38600	OK	27.0156	60.2916	1.15817	4.67189	0.0002	0.0264611	yes
AT4G27310.1	4:13675536-13677055	COI0	38600	OK	50.491	24.3515	-1.05202	-3.99685	0.0002	0.0264611	yes
AT4G36570.1	4:17254289-17255762	COI0	38600	OK	25.4973	5.81045	-2.13362	-6.79651	0.0002	0.0264611	yes
AT4G38470.1	4:17998895-18003757	COI0	38600	OK	13.3249	27.1942	1.02917	3.52147	0.0002	0.0264611	yes
AT5G02540.1	5:568424-570973	COI0	38600	OK	17.7836	5.47099	-1.70067	-5.25218	0.0002	0.0264611	yes
AT5G25240.1	5:8746593-8747290	COI0	38600	OK	10.4839	37.2202	1.8279	5.22585	0.0002	0.0264611	yes
AT5G47040.1	5:19092857-19098772	COI0	38600	OK	32.2177	65.4348	1.0222	3.94242	0.0002	0.0264611	yes
AT1G49500.1	1:18320489-18322505	COI0	38600	OK	83.1098	170.368	1.03557	3.60493	0.00025	0.031317	yes
AT2G02710.1	2:758692-761064	COI0	38600	OK	32.9291	67.9409	1.04492	3.63933	0.00025	0.031317	yes
AT2G23810.1	2:10135604-10137595	COI0	38600	OK	59.5557	125.443	1.07473	6.05952	0.00025	0.031317	yes
AT3G04720.1	3:1285424-1286760	COI0	38600	OK	344.214	150.815	-1.19052	-4.69178	0.00025	0.031317	yes
AT3G09440.1	3:2901198-2905947	COI0	38600	OK	480.017	182.353	-1.39635	-3.79387	0.00025	0.031317	yes
AT3G12145.1	3:3874486-3879068	COI0	38600	OK	108.364	50.316	-1.10679	-4.07615	0.00025	0.031317	yes
AT4G16590.1	4:9345149-9349258	COI0	38600	OK	10.4866	1.87745	-2.4817	-5.57899	0.00025	0.031317	yes
AT4G27900.1	4:13890471-13893073	COI0	38600	OK	46.044	20.9064	-1.13906	-3.81213	0.00025	0.031317	yes
AT5G08230.1	5:2641393-2650125	COI0	38600	OK	4.9503	20.8716	2.07595	7.41067	0.00025	0.031317	yes
AT5G14920.1	5:4826140-4828384	COI0	38600	OK	59.4563	31.0984	-0.934991	-3.34175	0.00025	0.031317	yes
AT5G26220.1	5:9162968-9164884	COI0	38600	OK	15.6276	3.30753	-2.24027	-4.4624	0.00025	0.031317	yes
AT1G24260.1	1:8593535-8596123	COI0	38600	OK	34.727	14.447	-1.26528	-3.86245	0.0003	0.0366448	yes
AT3G55630.1	3:20636606-20639492	COI0	38600	OK	34.6113	69.8152	1.0123	3.51182	0.0003	0.0366448	yes
AT4G36530.1	4:17239910-17242168	COI0	38600	OK	39.4601	79.9384	1.01849	3.56961	0.0003	0.0366448	yes
AT5G02940.1	5:682410-689955	COI0	38600	OK	15.0395	30.6353	1.02644	3.53934	0.0003	0.0366448	yes
AT5G56870.1	5:23003908-23009709	COI0	38600	OK	22.4691	44.2729	0.978482	4.54862	0.0003	0.0366448	yes
AT1G60960.1	1:22445298-22447299	COI0	38600	OK	25.204	10.7861	-1.22447	-3.72905	0.00035	0.0413787	yes
AT1G62515.1	1:23136365-23137413	COI0	38600	OK	38.6647	125.096	1.69395	3.75681	0.00035	0.0413787	yes
AT1G75910.1	1:28501433-28503283	COI0	38600	OK	42.1385	17.9663	-1.22985	-5.37774	0.00035	0.0413787	yes
AT2G06983.1	2:2888893-2890172	COI0	38600	OK	2.52872	0	#NAME?	#NAME?	0.00035	0.0413787	yes
AT2G25510.1	2:10856270-10857217	COI0	38600	OK	409.009	203.816	-1.00487	-3.48117	0.00035	0.0413787	yes
AT4G14550.1	4:8347821-8350263	COI0	38600	OK	7.32626	22.7117	1.63228	3.81698	0.00035	0.0413787	yes
AT1G24575.1	1:8710846-8711578	COI0	38600	OK	112.104	52.4822	-1.09494	-6.27854	0.0004	0.0453765	yes
AT1G49570.1	1:18346957-18349049	COI0	38600	OK	9.89948	1.8306	-2.43504	-5.63718	0.0004	0.0453765	yes
AT1G66940.1	1:24969873-24974946	COI0	38600	OK	29.0077	11.467	-1.33896	-3.73257	0.0004	0.0453765	yes
AT1G76470.1	1:28689765-28691659	COI0	38600	OK	13.8867	1.3091	-3.40705	-8.54637	0.0004	0.0453765	yes
AT2G16750.1	2:7271011-7274754	COI0	38600	OK	10.8745	3.37976	-1.68596	-4.11067	0.0004	0.0453765	yes
AT3G28220.1	3:10524180-10526733	COI0	38600	OK	7.68057	21.4052	1.47868	5.83492	0.0004	0.0453765	yes
AT3G50740.1	3:18855042-18857040	COI0	38600	OK	43.7321	21.992	-0.991714	-3.62553	0.0004	0.0453765	yes
AT4G01037.1	4:451193-453243	COI0	38600	OK	30.3534	61.2645	1.01319	4.4305	0.0004	0.0453765	yes
AT4G08670.1	4:5536544-5538310	COI0	38600	OK	18.8716	1.67682	-3.49241	-7.52194	0.0004	0.0453765	yes
AT4G18960.1	4:10382855-10388539	COI0	38600	OK	11.125	3.39833	-1.71091	-3.87689	0.0004	0.0453765	yes
AT4G22990.1	4:12048159-12051891	COI0	38600	OK	7.94693	18.6076	1.22742	3.74516	0.0004	0.0453765	yes
AT5G40240.1	5:16081987-16085213	COI0	38600	OK	25.6646	10.8714	-1.23924	-3.65881	0.0004	0.0453765	yes
AT2G14900.1	2:6404130-6405352	COI0	38600	OK	93.4972	42.0442	-1.15302	-5.72008	0.00045	0.0497077	yes
AT2G20670.1	2:8911859-8913747	COI0	38600	OK	188.523	439.372	1.2207	4.11037	0.00045	0.0497077	yes
AT3G22121.1	3:7794757-7796460	COI0	38600	OK	222.518	108.449	-1.0369	-3.51981	0.00045	0.0497077	yes
AT4G17490.1	4:9752823-9754161	COI0	38600	OK	4.46324	13.3396	1.57955	3.66254	0.00045	0.0497077	yes
AT5G01520.1	5:206431-208611	COI0	38600	OK	9.80173	25.2364	1.3644	3.82386	0.00045	0.0497077	yes
AT5G04130.1	5:1119936-1128144	COI0	38600	OK	22.1857	44.4353	1.00208	3.49567	0.00045	0.0497077	yes
AT5G61160.1	5:24608604-24610329	COI0	38600	OK	7.12424	1.00376	-2.82732	-4.86123	0.00045	0.0497077	yes
AT1G49380.1	1:18276642-18281122	COI0	38600	OK	25.289	48.9918	0.954029	4.20903	0.0005	0.054414	no
AT2G26150.1	2:11135623-11137792	COI0	38600	OK	28.2448	12.8049	-1.14129	-3.56784	0.0005	0.054414	no
AT5G40348.1	5:16136593-16141245	COI0	38600	OK	1.08876	0	#NAME?	#NAME?	0.0005	0.054414	no
AT1G12570.1	1:4276504-4281131	COI0	38600	OK	13.5092	5.89167	-1.1972	-3.57785	0.00055	0.0583456	no
AT1G31580.1	1:11310996-11311989	COI0	38600	OK	806.701	366.617	-1.13776	-6.03063	0.00055	0.0583456	no
AT2G23000.1	2:9791891-9796408	COI0	38600	OK	17.4401	36.396	1.06137	3.48341	0.00055	0.0583456	no
AT2G24550.1	2:10427855-10429487	COI0	38600	OK	36.4071	75.3879	1.05012	5.10401	0.00055	0.0583456	no
AT3G59040.1	3:21819039-21824425	COI0	38600	OK	31.0667	57.2647	0.882274	3.20456	0.00055	0.0583456	no
AT4G16160.1	4:9157470-9158933	COI0	38600	OK	0.724878	0	#NAME?	#NAME?	0.00055	0.0583456	no
AT1G07645.1	1:2367436-2368436	COI0	38600	OK	1.27602	0	#NAME?	#NAME?	0.0006	0.061758	no
AT2G11810.1	2:4743161-4746813	COI0	38600	OK	9.35172	2.98258	-1.64867	-3.77874	0.0006	0.061758	no
AT3G25265.1	3:9202691-9203671	COI0	38600	OK	3.76674	0	#NAME?	#NAME?	0.0006	0.061758	no
AT3G62640.1	3:23166218-23166979	COI0	38600	OK	1.60836	0	#NAME?	#NAME?	0.0006	0.061758	no
AT5G39580.1	5:15847064-15849141	COI0	38600	OK	9.28095	21.8293	1.23392	3.55778	0.0006	0.061758	no
AT5G66400.1	5:26518276-26525177	COI0	38600	OK	5.63403	61.6271	3.45132	3.82467	0.0006	0.061758	no
AT2G45990.1	2:18919315-18922179	COI0	38600	OK	44.6413	93.9434	1.07341	4.2832	0.00065	0.0658682	no
AT3G20520.1	3:7162765-7165864	COI0	38600	OK	5.36817	0.589718	-3.18633	-6.0436	0.00065	0.0658682	no
AT4G33040.1	4:15940227-15941493	COI0	38600	OK	21.8885	7.13791	-1.6166	-6.76486	0.00065	0.0658682	no
AT1G09240.1	1:2984828-2986231	COI0	38600	OK	63.2306	30.7395	-1.04053	-5.36733	0.0007	0.0693825	no
AT1G21250.1	1:7439170-7442113	COI0	38600	OK	42.9569	21.6377	-0.989343	-3.72816	0.0007	0.0693825	no
AT2G01850.1	2:385170-387478	COI0	38600	OK	76.0716	146.493	0.945399	4.28864	0.0007	0.0693825	no
AT2G38400.1	2:16083644-16086453	COI0	38600	OK	23.9879	48.4396	1.01388	3.4715	0.0007	0.0693825	no
AT2G40520.1	2:16922336-16925961	COI0	38600	OK	10.3394	21.7203	1.07089	3.44963	0.0007	0.0693825	no
AT2G44460.1	2:18346305-18350026	COI0	38600	OK	7.19246	1.2082	-2.57362	-4.70696	0.0007	0.0693825	no
AT5G18660.1	5:6220709-6222300	COI0	38600	OK	26.3129	51.9218	0.980569	4.57793	0.0007	0.0693825	no
AT1G03440.1	1:852150-854297	COI0	38600	OK	13.7572	27.0357	0.974671	3.13476	0.00075	0.0729868	no
AT1G13670.1	1:4688017-4689265	COI0	38600	OK	7.63915	19.3257	1.33904	3.75316	0.00075	0.0729868	no
AT1G31770.1	1:11374759-11379734	COI0	38600	OK	22.8236	11.1309	-1.03595	-3.4579	0.00075	0.0729868	no
AT3G48420.1	3:17929580-17934744	COI0	38600	OK	44.5953	85.9583	0.946746	4.19557	0.00075	0.0729868	no
AT4G11650.1	4:7024851-7026224	COI0	38600	OK	66.8903	33.3709	-1.0032	-3.66784	0.00075	0.0729868	no
AT4G31210.1	4:15165124-15176292	COI0	38600	OK	16.257	30.903	0.926682	3.07003	0.00075	0.0729868	no
AT5G25140.1	5:8672315-8674749	COI0	38600	OK	15.1292	31.0726	1.0383	4.47628	0.00075	0.0729868	no
AT5G57180.1	5:23167773-23171025	COI0	38600	OK	33.2793	63.2462	0.926355	3.31864	0.00075	0.0729868	no
AT1G36390.1	1:13700764-13703573	COI0	38600	OK	28.791	65.3243	1.182	5.47133	0.0008	0.0763384	no
AT1G51140.1	1:18943446-18945812	COI0	38600	OK	29.7058	56.974	0.939559	3.40675	0.0008	0.0763384	no
AT2G45660.1	2:18807504-18811125	COI0	38600	OK	24.9232	50.25	1.01164	3.38837	0.0008	0.0763384	no
AT3G24460.1	3:8885817-8893203	COI0	38600	OK	11.7821	25.8088	1.13127	4.68373	0.0008	0.0763384	no
AT5G37990.1	5:15133866-15135169	COI0	38600	OK	11.7085	28.3221	1.27437	4.65943	0.0008	0.0763384	no
AT5G44620.1	5:17997596-18000451	COI0	38600	OK	12.3556	5.41552	-1.19	-4.0113	0.0008	0.0763384	no
AT1G73120.1	1:27497175-27498062	COI0	38600	OK	8.84002	27.6051	1.64281	4.99444	0.00085	0.0804576	no
AT2G46720.1	2:19197329-19200442	COI0	38600	OK	16.7684	7.87929	-1.0896	-4.68544	0.00085	0.0804576	no
AT1G14150.1	1:4839800-4841848	COI0	38600	OK	56.9525	108.936	0.935644	2.97855	0.0009	0.0841086	no
AT2G40330.1	2:16844587-16846194	COI0	38600	OK	8.93337	2.60816	-1.77617	-4.33062	0.0009	0.0841086	no
AT3G05730.1	3:1695042-1696708	COI0	38600	OK	26.2859	10.6411	-1.30464	-3.50176	0.0009	0.0841086	no
AT4G12720.1	4:7487224-7490127	COI0	38600	OK	30.3608	59.5685	0.972339	3.33759	0.0009	0.0841086	no
AT1G04040.1	1:1040374-1043887	COI0	38600	OK	41.7426	19.9953	-1.06186	-3.27962	0.00095	0.0872577	no
AT1G69260.1	1:26038904-26042741	COI0	38600	OK	4.9806	16.4068	1.7199	3.76992	0.00095	0.0872577	no
AT1G72770.1	1:27389947-27393327	COI0	38600	OK	52.6087	101.109	0.942536	3.23631	0.00095	0.0872577	no
AT3G10570.1	3:3301886-3303982	COI0	38600	OK	26.5938	13.2397	-1.00622	-3.41989	0.00095	0.0872577	no
AT1G64400.1	1:23915569-23919835	COI0	38600	OK	9.77487	20.8625	1.09376	4.43761	0.001	0.0894772	no
AT1G66850.1	1:24936875-24937434	COI0	38600	OK	35.5738	8.20182	-2.1168	-6.84016	0.001	0.0894772	no
AT3G01020.1	3:5103-6149	COI0	38600	OK	1.15842	0	#NAME?	#NAME?	0.001	0.0894772	no
AT3G01230.1	3:76630-77411	COI0	38600	OK	1.22255	0	#NAME?	#NAME?	0.001	0.0894772	no
AT3G12430.1	3:3949404-3950430	COI0	38600	OK	1.08655	0	#NAME?	#NAME?	0.001	0.0894772	no
AT3G52620.1	3:19513043-19513822	COI0	38600	OK	2.04373	0	#NAME?	#NAME?	0.001	0.0894772	no
AT4G10265.1	4:6373007-6373667	COI0	38600	OK	1.7781	0	#NAME?	#NAME?	0.001	0.0894772	no
AT4G17340.1	4:9698939-9700472	COI0	38600	OK	63.3119	123.59	0.965012	4.05561	0.001	0.0894772	no
AT4G25040.1	4:12868168-12869495	COI0	38600	OK	1.36741	0	#NAME?	#NAME?	0.001	0.0894772	no
AT5G22800.1	5:7615746-7620278	COI0	38600	OK	36.5773	69.8388	0.933082	3.28701	0.001	0.0894772	no
AT5G26692.1	5:9282478-9283155	COI0	38600	OK	1.84066	0	#NAME?	#NAME?	0.001	0.0894772	no
AT5G39650.1	5:15875124-15876116	COI0	38600	OK	0.890938	0	#NAME?	#NAME?	0.001	0.0894772	no
AT1G55560.1	1:20754216-20756656	COI0	38600	OK	5.53437	1.14284	-2.2758	-4.59345	0.00105	0.0931021	no
AT1G61800.1	1:22824413-22826902	COI0	38600	OK	18.7341	8.56901	-1.12847	-3.25401	0.00105	0.0931021	no
AT2G35800.1	2:15043972-15048611	COI0	38600	OK	14.2739	27.8889	0.966308	3.81121	0.00105	0.0931021	no
AT4G00050.1	4:17638-20183	COI0	38600	OK	26.4125	49.2307	0.898335	3.10366	0.00105	0.0931021	no
AT5G23660.1	5:7971646-7973995	COI0	38600	OK	36.1408	70.9934	0.974056	5.56627	0.00105	0.0931021	no
AT5G49330.1	5:19998822-20001572	COI0	38600	OK	13.7276	4.98771	-1.46063	-4.24595	0.00105	0.0931021	no
AT1G12080.1	1:4084161-4085185	COI0	38600	OK	124.708	66.5269	-0.906542	-3.19946	0.0011	0.0960884	no
AT2G43140.1	2:17931253-17935748	COI0	38600	OK	5.48959	0.616682	-3.1541	-4.64414	0.0011	0.0960884	no
AT5G21150.1	5:7192238-7198381	COI0	38600	OK	10.3398	4.66487	-1.1483	-3.62925	0.0011	0.0960884	no
AT1G19150.1	1:6612629-6613972	COI0	38600	OK	53.0644	102.765	0.953532	3.97681	0.00115	0.0994235	no
AT4G22880.1	4:12004725-12006209	COI0	38600	OK	12.7641	28.6207	1.16497	3.3686	0.00115	0.0994235	no
AT5G14570.1	5:4695083-4697078	COI0	38600	OK	26.083	13.2702	-0.974917	-3.03306	0.00115	0.0994235	no
AT5G54170.1	5:21984568-21987489	COI0	38600	OK	40.0039	73.3467	0.874592	4.5237	0.00115	0.0994235	no
AT1G70560.1	1:26604854-26607652	COI0	38600	OK	11.1469	3.64277	-1.61353	-4.1169	0.0012	0.10299	no
AT5G01600.1	5:224133-230051	COI0	38600	OK	407.253	1101.14	1.435	3.34893	0.0012	0.10299	no
AT1G62540.1	1:23151633-23155728	COI0	38600	OK	19.6137	37.4246	0.932128	3.20908	0.00125	0.105892	no
AT3G23510.1	3:8427556-8433340	COI0	38600	OK	1.13337	4.43251	1.96751	4.74753	0.00125	0.105892	no
AT5G19190.1	5:6457025-6458504	COI0	38600	OK	87.9654	164.954	0.907054	4.64969	0.00125	0.105892	no
AT1G30360.1	1:10715481-10718997	COI0	38600	OK	43.6524	83.7355	0.939779	3.68095	0.0013	0.10903	no
AT1G71770.1	1:26989317-26994259	COI0	38600	OK	6.00904	0.445429	-3.75387	-5.22845	0.0013	0.10903	no
AT4G18240.1	4:10082107-10087203	COI0	38600	OK	14.8821	28.0148	0.912607	3.78574	0.0013	0.10903	no
AT3G48500.1	3:17962079-17965723	COI0	38600	OK	30.7037	56.873	0.88933	3.14144	0.00135	0.112105	no
AT1G11700.1	1:3945583-3946757	COI0	38600	OK	30.3901	14.5604	-1.06155	-3.13653	0.0014	0.11496	no
AT2G37130.1	2:15597920-15600154	COI0	38600	OK	52.9466	27.799	-0.929506	-3.16892	0.0014	0.11496	no
AT5G35220.1	5:13484402-13487594	COI0	38600	OK	47.129	87.179	0.887365	4.23592	0.0014	0.11496	no
AT5G57050.1	5:23087121-23089631	COI0	38600	OK	9.78699	20.1457	1.04153	3.21778	0.0014	0.11496	no
AT1G77120.1	1:28975254-28978750	COI0	38600	OK	18.4592	4.6254	-1.99669	-4.04241	0.00145	0.117267	no
AT3G28750.1	3:10791498-10792846	COI0	38600	OK	23.653	0.612217	-5.27183	-8.56167	0.00145	0.117267	no
AT5G24160.1	5:8182916-8186704	COI0	38600	OK	47.0038	86.3173	0.876872	3.10292	0.00145	0.117267	no
AT5G43850.1	5:17627131-17629363	COI0	38600	OK	121.429	231.818	0.932886	3.54284	0.00145	0.117267	no
AT5G45680.1	5:18530833-18532337	COI0	38600	OK	23.1613	52.3081	1.17532	5.53605	0.00145	0.117267	no
AT1G23570.1	1:8354805-8356507	COI0	38600	OK	8.99317	1.63805	-2.45685	-4.09405	0.0015	0.119667	no
AT1G52040.1	1:19350313-19352791	COI0	38600	OK	19.6184	8.65263	-1.181	-4.523	0.0015	0.119667	no
AT2G33380.1	2:14144830-14146555	COI0	38600	OK	108.915	202.263	0.893034	3.13736	0.0015	0.119667	no
AT3G50930.1	3:18929525-18932181	COI0	38600	OK	6.48222	13.7668	1.08663	3.87683	0.0015	0.119667	no
AT1G04580.1	1:1252004-1257893	COI0	38600	OK	1.95799	0.311658	-2.65133	-4.60284	0.00155	0.121515	no
AT1G11765.1	1:3973873-3974594	COI0	38600	OK	1.3769	0	#NAME?	#NAME?	0.00155	0.121515	no
AT1G57770.1	1:21395095-21398300	COI0	38600	OK	10.2218	21.1879	1.0516	3.64715	0.00155	0.121515	no
AT2G22055.1	2:9379464-9380114	COI0	38600	OK	1.61844	0	#NAME?	#NAME?	0.00155	0.121515	no
AT3G13227.1	3:4257881-4258648	COI0	38600	OK	1.04935	0	#NAME?	#NAME?	0.00155	0.121515	no
AT3G21945.1	3:7732262-7733294	COI0	38600	OK	0.947572	0	#NAME?	#NAME?	0.00155	0.121515	no
AT3G62260.1	3:23038265-23040668	COI0	38600	OK	14.9374	29.144	0.964264	3.16023	0.00155	0.121515	no
AT4G10603.1	4:6550921-6551975	COI0	38600	OK	3.06115	0	#NAME?	#NAME?	0.00155	0.121515	no
AT4G18810.1	4:10322059-10325906	COI0	38600	OK	58.1312	110.353	0.924743	3.18037	0.00155	0.121515	no
AT5G20230.1	5:6826364-6827748	COI0	38600	OK	14.5372	30.1192	1.05093	3.88391	0.00155	0.121515	no
AT1G23250.1	1:8255126-8256770	COI0	38600	OK	1.14456	0	#NAME?	#NAME?	0.0016	0.123787	no
AT2G29290.1	2:12585855-12589759	COI0	38600	OK	18.2935	37.9725	1.05362	3.70563	0.0016	0.123787	no
AT3G23400.1	3:8376443-8378364	COI0	38600	OK	86.1005	158.375	0.879251	3.09582	0.0016	0.123787	no
AT4G04460.1	4:2224421-2230851	COI0	38600	OK	25.6925	9.10921	-1.49595	-4.37492	0.0016	0.123787	no
AT4G39480.1	4:18362257-18364359	COI0	38600	OK	9.44442	3.47627	-1.44192	-4.20161	0.0016	0.123787	no
AT5G59220.1	5:23894403-23896939	COI0	38600	OK	4.27068	9.89453	1.21216	3.24798	0.0016	0.123787	no
AT3G10340.1	3:3203987-3208135	COI0	38600	OK	6.52116	12.9232	0.986757	2.86293	0.00165	0.126656	no
AT3G48840.1	3:18112533-18114070	COI0	38600	OK	1.41715	0	#NAME?	#NAME?	0.00165	0.126656	no
AT4G11460.1	4:6963520-6967200	COI0	38600	OK	3.99898	0.580462	-2.78436	-4.05398	0.00165	0.126656	no
AT5G40890.1	5:16378892-16385424	COI0	38600	OK	57.1363	110.696	0.954117	3.17923	0.00165	0.126656	no
AT5G47190.1	5:19164183-19166135	COI0	38600	OK	123.862	235.143	0.924806	3.41179	0.00165	0.126656	no
AT1G73920.1	1:27790736-27794928	COI0	38600	OK	26.7785	49.0324	0.87266	3.13695	0.0017	0.128649	no
AT1G75940.1	1:28511141-28514284	COI0	38600	OK	51.5808	27.6816	-0.897905	-3.49204	0.0017	0.128649	no
AT3G28500.1	3:10682028-10682979	COI0	38600	OK	43.4022	19.0786	-1.18582	-6.18051	0.0017	0.128649	no
AT5G56550.1	5:22895615-22896734	COI0	38600	OK	59.1658	110.285	0.898407	4.40888	0.0017	0.128649	no
AT2G25080.1	2:10667897-10670127	COI0	38600	OK	188.469	371.643	0.979589	4.13606	0.00175	0.131252	no
AT4G28290.1	4:14010684-14012700	COI0	38600	OK	20.1507	44.8892	1.15554	3.21135	0.00175	0.131252	no
AT5G35790.1	5:13956671-13959830	COI0	38600	OK	52.7295	99.1302	0.910713	3.45567	0.00175	0.131252	no
AT2G20180.1	2:8701012-8707009	COI0	38600	OK	17.2505	31.2858	0.858872	2.97466	0.0018	0.134488	no
AT3G14900.1	3:5013290-5015342	COI0	38600	OK	10.7387	21.8237	1.02307	3.91382	0.00185	0.136321	no
AT3G47450.1	3:17481995-17486347	COI0	38600	OK	26.0514	47.7043	0.872759	3.05312	0.00185	0.136321	no
AT4G04840.1	4:2449433-2451651	COI0	38600	OK	3.51601	15.1079	2.10329	6.08547	0.00185	0.136321	no
AT1G32250.1	1:11639740-11640393	COI0	38600	OK	0.980639	0	#NAME?	#NAME?	0.0019	0.138275	no
AT2G04115.1	2:1385437-1386071	COI0	38600	OK	1.60403	0	#NAME?	#NAME?	0.0019	0.138275	no
AT2G23130.1	2:9844133-9845385	COI0	38600	OK	21.0738	42.6072	1.01565	3.24232	0.0019	0.138275	no
AT4G28088.1	4:13961133-13961611	COI0	38600	OK	3.83712	0	#NAME?	#NAME?	0.0019	0.138275	no
AT4G32460.1	4:15660926-15665032	COI0	38600	OK	85.1342	45.0751	-0.917407	-3.05108	0.0019	0.138275	no
AT1G35310.1	1:12956118-12957090	COI0	38600	OK	15.4771	2.31058	-2.74381	-6.59771	0.00195	0.140696	no
AT4G29780.1	4:14579562-14582057	COI0	38600	OK	4.87365	10.3962	1.09298	3.0311	0.00195	0.140696	no
AT2G14285.1	2:6052331-6053994	COI0	38600	OK	45.5884	16.4978	-1.46639	-5.93443	0.002	0.143077	no
AT3G04550.1	3:1225918-1229763	COI0	38600	OK	34.8561	70.8212	1.02277	2.70559	0.002	0.143077	no
AT3G19170.1	3:6625376-6632164	COI0	38600	OK	118.096	255.096	1.11108	3.1988	0.002	0.143077	no
AT5G08600.1	5:2786176-2794219	COI0	38600	OK	34.3509	62.2326	0.857322	3.00838	0.002	0.143077	no
AT1G78170.1	1:29413873-29415197	COI0	38600	OK	42.9707	21.3898	-1.00643	-4.29297	0.00205	0.145242	no
AT2G39980.1	2:16687672-16690182	COI0	38600	OK	30.739	16.769	-0.874275	-3.09904	0.00205	0.145242	no
AT5G09730.1	5:3014893-3018342	COI0	38600	OK	3.40615	0.216068	-3.97858	-4.73457	0.00205	0.145242	no
AT2G43150.1	2:17945661-17947155	COI0	38600	OK	41.5837	21.9843	-0.919543	-3.06219	0.0021	0.147894	no
AT2G46880.1	2:19264572-19266456	COI0	38600	OK	7.01495	1.55386	-2.17458	-3.80665	0.0021	0.147894	no
AT4G38540.1	4:18020566-18025298	COI0	38600	OK	50.5498	24.9292	-1.01987	-3.17245	0.0021	0.147894	no
AT2G15970.1	2:6949850-6951192	COI0	38600	OK	91.3592	164.948	0.852389	3.01619	0.00215	0.150695	no
AT5G24660.1	5:8443278-8444101	COI0	38600	OK	16.2019	5.88467	-1.46113	-3.4333	0.00215	0.150695	no
AT1G10682.1	1:3544912-3545614	COI0	38600	OK	73.6136	36.4524	-1.01396	-4.94304	0.0022	0.152925	no
AT1G13430.1	1:4606499-4607780	COI0	38600	OK	28.4724	13.6909	-1.05635	-3.99957	0.0022	0.152925	no
AT2G35370.1	2:14891040-14892298	COI0	38600	OK	120.03	218.549	0.864557	3.84982	0.0022	0.152925	no
AT1G25450.1	1:8938386-8940613	COI0	38600	OK	23.8712	11.948	-0.998503	-3.97855	0.00225	0.154756	no
[truncated: 30,463 more rows]

## Sheet: p-value <= 0.05
Genes	Locus	Control	Treatment	Status	FPKM_Control	FPKM_Treatment	log2(fold_change)	test_stat	p_value	q_value	significant
[truncated: 1,575 more rows]

[truncated: 4 more sheets: Normalized +0.00001, log -1.5 to +1.5, Downregulated genes, Up-regulated genes]
