# Supplementary material for: Rice (Oryza sativa L.) tau class glutathione S-transferase (OsGSTU30) overexpression in Arabidopsis thaliana modulates a regulatory network leading to heavy metal and drought stress tolerance
Source: Royal Society of Chemistry journal article supplement (doi:10.1039/c8mt00204e), 2018-11-21
Supplement: c8mt00204e4.xlsx [file c8mt00204e4.xlsx]

## Sheet: GO_WT
Gene Ontology Enrichment and list of genes involved in REVIGO Interactive Graph of Wild-type.
GO ID	term_type	Gene Ontology Term	queryitem	querytotal	bgitem	bgtotal	pvalue	FDR	TAIR Gene ID
Biological process
GO:0010876	P	lipid localization	15	363	24	37767	7.3e-21	5e-18	// AT1G66850.1 // AT4G33355.1 // AT5G07530.1 // AT5G07510.1 // AT3G22142.1 // AT4G08670.1 // AT1G18280.1 // AT5G07550.1 // AT1G62510.1 // AT4G12470.1 // AT5G07520.1 // AT4G15160.1 // AT5G07560.1 // AT4G12500.1 // AT5G07230.1
GO:0019915	P	lipid storage	5	363	24	37767	7.5e-06	0.0017	// AT5G07510.1 // AT5G07520.1 // AT5G07530.1 // AT5G07550.1 // AT5G07560.1
GO:0006869	P	lipid transport	10	363	163	37767	7e-06	0.0017	// AT1G66850.1 // AT4G33355.1 // AT3G22142.1 // AT4G08670.1 // AT1G18280.1 // AT1G62510.1 // AT4G12470.1 // AT4G15160.1 // AT4G12500.1 // AT5G07230.1
GO:0019953	P	sexual reproduction	7	363	80	37767	2e-05	0.0025	// AT5G07530.1 // AT1G75930.1 // AT5G07550.1 // AT5G07560.1 // AT5G07510.1 // AT5G07520.1 // AT4G13560.1
GO:0009555	P	pollen development	9	363	148	37767	2.1e-05	0.0025	// AT1G01280.1 // AT1G22130.1 // AT1G07340.1 // AT5G46795.1 // AT3G11980.1 // AT3G28780.1 // AT2G13680.1 // AT3G48360.1 // AT5G63160.1
GO:0033036	P	macromolecule localization	16	363	462	37767	1.7e-05	0.0025	// AT1G66850.1 // AT4G33355.1 // AT5G07530.1 // AT5G07510.1 // AT3G22142.1 // AT4G08670.1 // AT1G18280.1 // AT5G07550.1 // AT1G62510.1 // AT4G16160.1 // AT4G12470.1 // AT5G07520.1 // AT4G15160.1 // AT5G07560.1 // AT4G12500.1 // AT5G07230.1
GO:0009725	P	response to hormone stimulus	24	363	982	37767	4.3e-05	0.0042	// AT1G69260.1 // AT3G12830.1 // AT3G43120.1 // AT1G15360.1 // AT5G37260.1 // AT4G17490.1 // AT5G20820.1 // AT2G39800.1 // AT4G21440.1 // AT1G75580.1 // AT1G76930.1 // AT4G05100.1 // AT5G66400.1 // AT1G70560.1 // AT5G45820.1 // AT3G48360.1 // AT4G14550.1 // AT5G15960.1 // AT5G13350.1 // AT5G45890.1 // AT4G37260.1 // AT5G63160.1 // AT4G08950.1 // AT5G57560.1
GO:0051179	P	localization	37	363	1922	37767	6.4e-05	0.0055	// AT1G66850.1 // AT1G71680.1 // AT4G28700.1 // AT2G02020.1 // AT1G62510.1 // AT4G16160.1 // AT5G07510.1 // AT3G05960.1 // AT5G37810.1 // AT4G01470.1 // AT1G08730.1 // AT4G33355.1 // AT1G07340.1 // AT1G05580.1 // AT4G25750.1 // AT3G09530.1 // AT5G07520.1 // AT4G32510.1 // AT4G08670.1 // AT1G54560.1 // AT1G18280.1 // AT3G54700.1 // AT1G80660.1 // AT4G26590.1 // AT3G08560.1 // AT2G22950.1 // AT5G07…
GO:0042221	P	response to chemical stimulus	39	363	2085	37767	7.4e-05	0.0056	// AT4G30170.1 // AT1G69260.1 // AT3G12830.1 // AT1G26320.1 // AT3G43120.1 // AT1G49570.1 // AT5G37260.1 // AT4G17490.1 // AT1G73120.1 // AT5G20820.1 // AT2G39800.1 // AT4G21440.1 // AT5G26220.1 // AT1G21270.1 // AT1G75580.1 // AT1G76930.1 // AT5G57560.1 // AT5G66400.1 // AT1G70560.1 // AT5G45820.1 // AT1G77120.1 // AT3G48360.1 // AT3G16670.1 // AT3G47340.1 // AT2G14610.1 // AT4G14550.1 // AT5G15…
GO:0007267	P	cell-cell signaling	5	363	43	37767	9.3e-05	0.0064	// AT2G22055.1 // AT1G28270.1 // AT1G61566.1 // AT3G25170.1 // AT1G61563.1
GO:0009719	P	response to endogenous stimulus	24	363	1068	37767	0.00015	0.0093	// AT1G69260.1 // AT3G12830.1 // AT3G43120.1 // AT1G15360.1 // AT5G37260.1 // AT4G17490.1 // AT5G20820.1 // AT2G39800.1 // AT4G21440.1 // AT1G75580.1 // AT1G76930.1 // AT4G05100.1 // AT5G66400.1 // AT1G70560.1 // AT5G45820.1 // AT3G48360.1 // AT4G14550.1 // AT5G15960.1 // AT5G13350.1 // AT5G45890.1 // AT4G37260.1 // AT5G63160.1 // AT4G08950.1 // AT5G57560.1
GO:0006810	P	transport	33	363	1846	37767	0.00058	0.03	// AT1G66850.1 // AT1G71680.1 // AT4G28700.1 // AT2G02020.1 // AT1G62510.1 // AT4G16160.1 // AT4G01470.1 // AT3G05960.1 // AT5G37810.1 // AT1G08730.1 // AT4G33355.1 // AT1G07340.1 // AT1G05580.1 // AT4G25750.1 // AT3G09530.1 // AT4G32510.1 // AT1G54560.1 // AT1G18280.1 // AT3G54700.1 // AT1G80660.1 // AT4G26590.1 // AT3G08560.1 // AT2G22950.1 // AT4G08670.1 // AT4G36490.1 // AT4G15160.1 // AT5G07…
GO:0051234	P	establishment of localization	33	363	1851	37767	0.00061	0.03	// AT1G66850.1 // AT1G71680.1 // AT4G28700.1 // AT2G02020.1 // AT1G62510.1 // AT4G16160.1 // AT4G01470.1 // AT3G05960.1 // AT5G37810.1 // AT1G08730.1 // AT4G33355.1 // AT1G07340.1 // AT1G05580.1 // AT4G25750.1 // AT3G09530.1 // AT4G32510.1 // AT1G54560.1 // AT1G18280.1 // AT3G54700.1 // AT1G80660.1 // AT4G26590.1 // AT3G08560.1 // AT2G22950.1 // AT4G08670.1 // AT4G36490.1 // AT4G15160.1 // AT5G07…
GO:0048229	P	gametophyte development	9	363	233	37767	0.00056	0.03	// AT1G01280.1 // AT1G22130.1 // AT1G07340.1 // AT5G46795.1 // AT3G11980.1 // AT3G28780.1 // AT2G13680.1 // AT3G48360.1 // AT5G63160.1
GO:0009856	P	pollination	7	363	145	37767	0.00066	0.031	// AT5G07530.1 // AT5G14380.1 // AT2G07040.1 // AT4G24580.1 // AT3G01700.1 // AT3G12000.1 // AT1G65790.1
GO:0010033	P	response to organic substance	26	363	1342	37767	0.00073	0.032	// AT1G69260.1 // AT3G12830.1 // AT3G43120.1 // AT1G15360.1 // AT5G37260.1 // AT4G17490.1 // AT5G20820.1 // AT2G39800.1 // AT4G21440.1 // AT1G21270.1 // AT1G75580.1 // AT1G76930.1 // AT4G05100.1 // AT5G66400.1 // AT1G70560.1 // AT5G45820.1 // AT3G48360.1 // AT3G47340.1 // AT4G14550.1 // AT5G15960.1 // AT5G13350.1 // AT5G45890.1 // AT4G37260.1 // AT5G63160.1 // AT4G08950.1 // AT5G57560.1
GO:0009733	P	response to auxin stimulus	11	363	360	37767	0.00095	0.039	// AT3G12830.1 // AT1G75580.1 // AT3G43120.1 // AT4G14550.1 // AT5G13350.1 // AT5G57560.1 // AT5G20820.1 // AT3G48360.1 // AT5G37260.1 // AT5G63160.1 // AT4G37260.1
GO:0050896	P	response to stimulus	58	363	4057	37767	0.0015	0.059	// AT3G47340.1 // AT4G30170.1 // AT1G69260.1 // AT3G12830.1 // AT1G26320.1 // AT3G43120.1 // AT1G07645.1 // AT1G53540.1 // AT1G49570.1 // AT5G37260.1 // AT2G46440.1 // AT4G16260.1 // AT1G73120.1 // AT5G45890.1 // AT4G38700.1 // AT5G20820.1 // AT2G39800.1 // AT2G43530.1 // AT4G21440.1 // AT4G10265.1 // AT5G26220.1 // AT1G21270.1 // AT1G75580.1 // AT1G76930.1 // AT5G57560.1 // AT5G66400.1 // AT1G70…
GO:0048869	P	cellular developmental process	13	363	520	37767	0.002	0.072	// AT1G01280.1 // AT4G18960.1 // AT2G07040.1 // AT2G17950.1 // AT1G20190.1 // AT5G14380.1 // AT3G11980.1 // AT1G70560.1 // AT3G28780.1 // AT2G13680.1 // AT3G01700.1 // AT4G24972.1 // AT1G21270.1
GO:0032989	P	cellular component morphogenesis	9	363	289	37767	0.0024	0.082	// AT2G07040.1 // AT1G01280.1 // AT5G14380.1 // AT1G20190.1 // AT1G21270.1 // AT3G11980.1 // AT3G28780.1 // AT2G13680.1 // AT3G01700.1
GO:0009605	P	response to external stimulus	11	363	429	37767	0.0036	0.11	// AT3G47340.1 // AT4G10265.1 // AT3G09922.1 // AT2G14610.1 // AT2G11810.1 // AT1G76930.1 // AT4G10270.1 // AT1G70560.1 // AT5G57560.1 // AT3G03540.1 // AT4G21440.1
GO:0031667	P	response to nutrient levels	5	363	101	37767	0.0035	0.11	// AT3G09922.1 // AT2G14610.1 // AT2G11810.1 // AT3G47340.1 // AT3G03540.1
GO:0009723	P	response to ethylene stimulus	7	363	199	37767	0.0038	0.11	// AT1G15360.1 // AT5G37260.1 // AT1G70560.1 // AT4G05100.1 // AT4G17490.1 // AT5G45890.1 // AT4G37260.1
GO:0006950	P	response to stress	36	363	2320	37767	0.0036	0.11	// AT3G47340.1 // AT4G30170.1 // AT1G26320.1 // AT1G53540.1 // AT1G49570.1 // AT5G37260.1 // AT4G16260.1 // AT1G73120.1 // AT4G38700.1 // AT2G39800.1 // AT2G43530.1 // AT4G21440.1 // AT4G10265.1 // AT1G76930.1 // AT5G57560.1 // AT5G66400.1 // AT3G03540.1 // AT1G77120.1 // AT3G48360.1 // AT3G16670.1 // AT3G09922.1 // AT2G14610.1 // AT5G41550.1 // AT4G10270.1 // AT5G15960.1 // AT4G12470.1 // AT5G47…
GO:0009737	P	response to abscisic acid stimulus	10	363	378	37767	0.0043	0.12	// AT1G69260.1 // AT5G45820.1 // AT1G76930.1 // AT5G37260.1 // AT5G15960.1 // AT4G05100.1 // AT4G21440.1 // AT2G39800.1 // AT5G66400.1 // AT4G37260.1
GO:0008610	P	lipid biosynthetic process	11	363	439	37767	0.0042	0.12	// AT1G76470.1 // AT3G21500.1 // AT1G43800.1 // AT3G23510.1 // AT2G11810.1 // AT1G15360.1 // AT2G23800.1 // AT4G11030.1 // AT3G03540.1 // AT1G04580.1 // AT3G25820.1
GO:0006979	P	response to oxidative stress	9	363	332	37767	0.0057	0.15	// AT4G30170.1 // AT1G26320.1 // AT1G49570.1 // AT5G47000.1 // AT4G11290.1 // AT1G73120.1 // AT2G39800.1 // AT5G19890.1 // AT3G16670.1
GO:0000003	P	reproduction	21	363	1186	37767	0.0063	0.15	// AT2G42830.1 // AT5G49360.1 // AT5G07530.1 // AT4G18960.1 // AT2G07040.1 // AT1G75930.1 // AT5G14380.1 // AT2G21650.1 // AT5G07550.1 // AT5G37260.1 // AT3G12000.1 // AT5G07510.1 // AT5G07520.1 // AT5G07560.1 // AT3G25050.1 // AT4G24972.1 // AT3G01700.1 // AT4G13560.1 // AT1G65790.1 // AT1G70560.1 // AT4G24580.1
GO:0009991	P	response to extracellular stimulus	5	363	117	37767	0.0064	0.15	// AT3G09922.1 // AT2G14610.1 // AT2G11810.1 // AT3G47340.1 // AT3G03540.1
GO:0042545	P	cell wall modification	5	363	123	37767	0.0078	0.18	// AT1G20190.1 // AT5G49180.1 // AT2G26450.1 // AT5G07410.1 // AT3G05610.1
GO:0060560	P	developmental growth involved in morphogenesis	5	363	186	37767	0.037	0.79	// AT1G20190.1 // AT5G14380.1 // AT1G21270.1 // AT3G01700.1 // AT2G07040.1
GO:0009826	P	unidimensional cell growth	5	363	186	37767	0.037	0.79	// AT1G20190.1 // AT5G14380.1 // AT1G21270.1 // AT3G01700.1 // AT2G07040.1
GO:0032502	P	developmental process	31	363	2304	37767	0.039	0.82	// AT4G18960.1 // AT3G55240.1 // AT5G37260.1 // AT3G28780.1 // AT2G39800.1 // AT4G13560.1 // AT5G63160.1 // AT1G22130.1 // AT1G07340.1 // AT1G20190.1 // AT3G11980.1 // AT2G42830.1 // AT2G41260.1 // AT3G48360.1 // AT1G01280.1 // AT2G07040.1 // AT2G17950.1 // AT3G25050.1 // AT5G49360.1 // AT4G24580.1 // AT3G01700.1 // AT5G45890.1 // AT4G14550.1 // AT1G70560.1 // AT2G17850.1 // AT2G21650.1 // AT5G14…
GO:0048468	P	cell development	5	363	197	37767	0.045	0.89	// AT2G17950.1 // AT1G70560.1 // AT5G14380.1 // AT3G01700.1 // AT2G07040.1
GO:0032787	P	monocarboxylic acid metabolic process	8	363	408	37767	0.047	0.89	// AT4G11030.1 // AT1G43800.1 // AT1G70560.1 // AT2G11810.1 // AT1G15360.1 // AT5G65690.1 // AT1G04580.1 // AT1G01280.1
GO:0009653	P	anatomical structure morphogenesis	11	363	637	37767	0.048	0.89	// AT2G07040.1 // AT1G01280.1 // AT5G14380.1 // AT1G20190.1 // AT1G21270.1 // AT4G14550.1 // AT3G11980.1 // AT1G70560.1 // AT3G28780.1 // AT2G13680.1 // AT3G01700.1
GO:0006970	P	response to osmotic stress	8	363	408	37767	0.047	0.89	// AT5G37260.1 // AT5G15960.1 // AT4G05100.1 // AT4G16260.1 // AT1G77120.1 // AT2G39800.1 // AT4G21440.1 // AT4G37260.1
GO:0032501	P	multicellular organismal process	28	363	2094	37767	0.052	0.94	// AT4G18960.1 // AT5G37260.1 // AT3G28780.1 // AT2G39800.1 // AT4G13560.1 // AT5G63160.1 // AT1G22130.1 // AT1G07340.1 // AT3G11980.1 // AT2G42830.1 // AT2G41260.1 // AT3G48360.1 // AT1G01280.1 // AT2G07040.1 // AT2G17950.1 // AT3G25050.1 // AT5G49360.1 // AT4G24580.1 // AT3G01700.1 // AT3G12000.1 // AT5G45890.1 // AT4G14550.1 // AT1G70560.1 // AT2G21650.1 // AT5G14380.1 // AT5G46795.1 // AT2G13…
GO:0007275	P	multicellular organismal development	27	363	2020	37767	0.056	0.98	// AT4G18960.1 // AT5G37260.1 // AT3G28780.1 // AT2G39800.1 // AT4G13560.1 // AT5G63160.1 // AT1G22130.1 // AT1G07340.1 // AT2G42830.1 // AT3G11980.1 // AT1G70560.1 // AT2G41260.1 // AT3G48360.1 // AT1G01280.1 // AT2G07040.1 // AT2G17950.1 // AT3G25050.1 // AT5G49360.1 // AT4G24580.1 // AT3G01700.1 // AT5G45890.1 // AT4G14550.1 // AT2G21650.1 // AT5G14380.1 // AT5G46795.1 // AT2G13680.1 // AT4G24…
GO:0080090	P	regulation of primary metabolic process	21	363	1952	37767	0.33	1	// AT4G39250.1 // AT5G17300.1 // AT4G36570.1 // AT4G30180.1 // AT5G53980.1 // AT3G10040.1 // AT1G35490.1 // AT2G21650.1 // AT1G15360.1 // AT5G37260.1 // AT3G21330.1 // AT2G42830.1 // AT4G05100.1 // AT4G17490.1 // AT5G60140.1 // AT3G21880.1 // AT2G43140.1 // AT2G46970.1 // AT4G21440.1 // AT4G37260.1 // AT4G06746.1
GO:0048589	P	developmental growth	5	363	242	37767	0.088	1	// AT1G20190.1 // AT5G14380.1 // AT1G21270.1 // AT3G01700.1 // AT2G07040.1
GO:0007165	P	signal transduction	7	363	1228	37767	0.95	1	// AT1G69260.1 // AT5G41550.1 // AT1G15360.1 // AT5G15960.1 // AT4G24580.1 // AT2G46970.1 // AT4G17490.1
GO:0051716	P	cellular response to stimulus	9	363	840	37767	0.42	1	// AT3G47340.1 // AT1G69260.1 // AT3G09922.1 // AT2G11810.1 // AT1G15360.1 // AT5G15960.1 // AT4G17490.1 // AT3G03540.1 // AT2G46970.1
GO:0048513	P	organ development	8	363	838	37767	0.56	1	// AT4G18960.1 // AT1G70560.1 // AT2G17950.1 // AT4G14550.1 // AT2G42830.1 // AT4G24972.1 // AT5G45890.1 // AT2G39800.1
GO:0016310	P	phosphorylation	11	363	1079	37767	0.46	1	// AT4G21400.1 // AT5G61350.1 // AT2G07040.1 // AT3G08560.1 // AT5G12000.1 // AT1G21270.1 // AT4G14780.1 // AT2G18470.1 // AT4G11460.1 // AT1G65790.1 // AT2G16750.1
GO:0051704	P	multi-organism process	11	363	776	37767	0.13	1	// AT5G07530.1 // AT1G75050.1 // AT2G07040.1 // AT2G14610.1 // AT5G14380.1 // AT2G46440.1 // AT4G12470.1 // AT4G24580.1 // AT3G01700.1 // AT3G12000.1 // AT1G65790.1
GO:0060255	P	regulation of macromolecule metabolic process	21	363	2060	37767	0.42	1	// AT4G39250.1 // AT5G17300.1 // AT4G36570.1 // AT4G30180.1 // AT5G53980.1 // AT3G10040.1 // AT1G35490.1 // AT2G21650.1 // AT1G15360.1 // AT5G37260.1 // AT3G21330.1 // AT2G42830.1 // AT4G05100.1 // AT4G17490.1 // AT5G60140.1 // AT3G21880.1 // AT2G43140.1 // AT2G46970.1 // AT4G21440.1 // AT4G37260.1 // AT4G06746.1
GO:0003006	P	reproductive developmental process	12	363	978	37767	0.24	1	// AT2G21650.1 // AT4G18960.1 // AT2G07040.1 // AT3G25050.1 // AT5G14380.1 // AT5G49360.1 // AT2G42830.1 // AT5G37260.1 // AT3G01700.1 // AT4G24972.1 // AT4G13560.1 // AT1G70560.1
GO:0008361	P	regulation of cell size	5	363	274	37767	0.13	1	// AT1G20190.1 // AT5G14380.1 // AT1G21270.1 // AT3G01700.1 // AT2G07040.1
GO:0043436	P	oxoacid metabolic process	13	363	859	37767	0.076	1	// AT5G25880.1 // AT4G11030.1 // AT1G43800.1 // AT1G70560.1 // AT4G08040.1 // AT3G47340.1 // AT2G11810.1 // AT1G15360.1 // AT5G65690.1 // AT4G26260.1 // AT1G04580.1 // AT1G01280.1 // AT2G39800.1
GO:0046483	P	heterocycle metabolic process	6	363	460	37767	0.29	1	// AT4G14690.1 // AT4G10260.1 // AT3G08560.1 // AT2G22950.1 // AT1G70560.1 // AT2G39800.1
GO:0019538	P	protein metabolic process	24	363	4009	37767	1	1	// AT4G21400.1 // AT5G12000.1 // AT5G61350.1 // AT2G16750.1 // AT4G21630.1 // AT5G09500.1 // AT1G21270.1 // AT2G18470.1 // AT4G22050.1 // AT5G59120.1 // AT1G60190.1 // AT1G71770.1 // AT2G45040.1 // AT2G23010.1 // AT2G07040.1 // AT5G59810.1 // AT5G22980.1 // AT4G14780.1 // AT4G25110.1 // AT5G45890.1 // AT4G11460.1 // AT3G45180.1 // AT2G21510.1 // AT1G65790.1
GO:0007154	P	cell communication	13	363	1399	37767	0.59	1	// AT1G65790.1 // AT3G47340.1 // AT1G61563.1 // AT5G07530.1 // AT3G09922.1 // AT2G11810.1 // AT3G25170.1 // AT4G24580.1 // AT3G03540.1 // AT3G12000.1 // AT1G28270.1 // AT2G22055.1 // AT1G61566.1
GO:0032535	P	regulation of cellular component size	5	363	277	37767	0.13	1	// AT1G20190.1 // AT5G14380.1 // AT1G21270.1 // AT3G01700.1 // AT2G07040.1
GO:0034645	P	cellular macromolecule biosynthetic process	24	363	3661	37767	0.98	1	// AT3G10040.1 // AT3G21880.1 // AT1G15360.1 // AT5G37260.1 // AT4G17490.1 // AT4G30180.1 // AT4G36570.1 // AT5G09500.1 // AT4G21440.1 // AT2G42830.1 // AT5G60140.1 // AT5G53980.1 // AT1G71770.1 // AT4G06746.1 // AT4G39250.1 // AT5G17300.1 // AT1G35490.1 // AT3G21330.1 // AT2G43140.1 // AT4G37260.1 // AT2G21650.1 // AT4G05100.1 // AT2G13680.1 // AT2G46970.1
GO:0016053	P	organic acid biosynthetic process	7	363	417	37767	0.11	1	// AT4G11030.1 // AT1G43800.1 // AT1G15360.1 // AT1G70560.1 // AT4G26260.1 // AT1G04580.1 // AT2G39800.1
GO:0006807	P	nitrogen compound metabolic process	31	363	3826	37767	0.86	1	// AT3G10040.1 // AT3G21880.1 // AT1G15360.1 // AT5G37260.1 // AT4G17490.1 // AT4G30180.1 // AT2G39800.1 // AT4G21440.1 // AT4G14690.1 // AT1G70560.1 // AT4G08040.1 // AT3G12430.1 // AT4G36570.1 // AT2G42830.1 // AT1G22760.1 // AT5G60140.1 // AT5G53980.1 // AT1G71770.1 // AT4G06746.1 // AT4G39250.1 // AT5G17300.1 // AT3G08560.1 // AT3G47340.1 // AT1G35490.1 // AT2G22950.1 // AT3G21330.1 // AT2G43…
GO:0050789	P	regulation of biological process	32	363	3697	37767	0.76	1	// AT1G69260.1 // AT4G18960.1 // AT3G10040.1 // AT3G21880.1 // AT1G15360.1 // AT5G37260.1 // AT4G17490.1 // AT4G30180.1 // AT4G21440.1 // AT4G14690.1 // AT1G70560.1 // AT4G36570.1 // AT2G42830.1 // AT5G60140.1 // AT5G53980.1 // AT3G48360.1 // AT4G06746.1 // AT4G39250.1 // AT5G17300.1 // AT2G17950.1 // AT1G35490.1 // AT5G41550.1 // AT5G15960.1 // AT4G24580.1 // AT4G33040.1 // AT2G43140.1 // AT4G37…
GO:0044267	P	cellular protein metabolic process	15	363	3487	37767	1	1	// AT4G21400.1 // AT5G09500.1 // AT5G61350.1 // AT2G07040.1 // AT5G12000.1 // AT1G21270.1 // AT4G14780.1 // AT2G18470.1 // AT3G45180.1 // AT1G60190.1 // AT2G21510.1 // AT4G11460.1 // AT1G71770.1 // AT1G65790.1 // AT2G16750.1
GO:0044262	P	cellular carbohydrate metabolic process	5	363	417	37767	0.37	1	// AT1G04580.1 // AT5G65690.1 // AT2G13680.1 // AT4G10260.1 // AT3G20520.1
GO:0000902	P	cell morphogenesis	5	363	259	37767	0.11	1	// AT1G20190.1 // AT5G14380.1 // AT1G21270.1 // AT3G01700.1 // AT2G07040.1
GO:0044260	P	cellular macromolecule metabolic process	38	363	6447	37767	1	1	// AT4G21400.1 // AT5G12000.1 // AT3G21880.1 // AT1G15360.1 // AT5G37260.1 // AT4G17490.1 // AT4G30180.1 // AT4G21440.1 // AT2G16750.1 // AT5G09500.1 // AT1G21270.1 // AT2G18470.1 // AT4G36570.1 // AT2G42830.1 // AT1G22760.1 // AT1G60190.1 // AT5G60140.1 // AT5G53980.1 // AT1G71770.1 // AT3G10040.1 // AT4G06746.1 // AT4G39250.1 // AT5G17300.1 // AT2G07040.1 // AT1G35490.1 // AT4G14780.1 // AT3G21…
GO:0016043	P	cellular component organization	12	363	1179	37767	0.46	1	// AT1G01280.1 // AT2G07040.1 // AT1G20190.1 // AT2G19770.1 // AT5G14380.1 // AT3G11980.1 // AT5G59370.1 // AT3G28780.1 // AT2G13680.1 // AT4G29340.1 // AT3G01700.1 // AT1G21270.1
GO:0090066	P	regulation of anatomical structure size	5	363	277	37767	0.13	1	// AT1G20190.1 // AT5G14380.1 // AT1G21270.1 // AT3G01700.1 // AT2G07040.1
GO:0065007	P	biological regulation	38	363	4188	37767	0.67	1	// AT1G69260.1 // AT4G18960.1 // AT3G10040.1 // AT3G21880.1 // AT1G15360.1 // AT5G37260.1 // AT4G17490.1 // AT4G30180.1 // AT4G21440.1 // AT4G21630.1 // AT4G14690.1 // AT1G21270.1 // AT1G20190.1 // AT4G36570.1 // AT2G42830.1 // AT5G60140.1 // AT5G53980.1 // AT3G48360.1 // AT4G06746.1 // AT4G39250.1 // AT5G17300.1 // AT2G07040.1 // AT2G17950.1 // AT1G35490.1 // AT5G41550.1 // AT3G21330.1 // AT4G24…
GO:0065008	P	regulation of biological quality	8	363	665	37767	0.31	1	// AT2G07040.1 // AT5G14380.1 // AT1G20190.1 // AT1G21270.1 // AT1G70560.1 // AT4G33040.1 // AT3G01700.1 // AT1G60740.1
GO:0006629	P	lipid metabolic process	12	363	841	37767	0.12	1	// AT1G76470.1 // AT3G21500.1 // AT1G43800.1 // AT3G23510.1 // AT2G11810.1 // AT1G15360.1 // AT2G23800.1 // AT4G11030.1 // AT3G03540.1 // AT1G04580.1 // AT1G01280.1 // AT3G25820.1
GO:0006811	P	ion transport	6	363	427	37767	0.23	1	// AT1G80660.1 // AT3G08560.1 // AT1G05580.1 // AT2G22950.1 // AT4G32510.1 // AT3G54700.1
GO:0009889	P	regulation of biosynthetic process	22	363	1881	37767	0.2	1	// AT3G10040.1 // AT3G21880.1 // AT1G15360.1 // AT5G37260.1 // AT4G17490.1 // AT4G30180.1 // AT4G36570.1 // AT4G14690.1 // AT4G21440.1 // AT2G42830.1 // AT5G60140.1 // AT5G53980.1 // AT4G06746.1 // AT4G39250.1 // AT5G17300.1 // AT1G35490.1 // AT3G21330.1 // AT2G43140.1 // AT4G37260.1 // AT2G21650.1 // AT4G05100.1 // AT2G46970.1
GO:0050794	P	regulation of cellular process	31	363	3375	37767	0.63	1	// AT1G69260.1 // AT4G18960.1 // AT3G10040.1 // AT3G21880.1 // AT1G15360.1 // AT5G37260.1 // AT4G17490.1 // AT4G30180.1 // AT4G21440.1 // AT4G14690.1 // AT1G70560.1 // AT4G36570.1 // AT2G42830.1 // AT5G60140.1 // AT5G53980.1 // AT4G06746.1 // AT4G39250.1 // AT5G17300.1 // AT2G17950.1 // AT1G35490.1 // AT5G41550.1 // AT5G15960.1 // AT4G24580.1 // AT4G33040.1 // AT2G43140.1 // AT4G37260.1 // AT3G21…
GO:0006952	P	defense response	6	363	766	37767	0.75	1	// AT2G14610.1 // AT2G43530.1 // AT5G41550.1 // AT4G10603.1 // AT4G12470.1 // AT4G38700.1
GO:0008152	P	metabolic process	81	363	10614	37767	0.99	1	// AT4G21400.1 // AT1G43800.1 // AT1G76470.1 // AT5G12000.1 // AT2G01918.1 // AT2G23010.1 // AT1G15360.1 // AT5G37260.1 // AT2G23800.1 // AT4G17490.1 // AT5G48140.1 // AT5G61350.1 // AT4G30180.1 // AT5G45890.1 // AT2G39800.1 // AT4G21440.1 // AT2G16750.1 // AT4G21630.1 // AT5G09500.1 // AT4G14690.1 // AT4G10260.1 // AT3G23510.1 // AT1G21270.1 // AT4G08040.1 // AT2G42830.1 // AT2G18470.1 // AT4G22…
GO:0016070	P	RNA metabolic process	14	363	1657	37767	0.72	1	// AT4G39250.1 // AT2G21650.1 // AT1G35490.1 // AT1G15360.1 // AT2G42830.1 // AT4G05100.1 // AT4G17490.1 // AT1G22760.1 // AT5G60140.1 // AT5G53980.1 // AT1G71770.1 // AT4G36570.1 // AT4G37260.1 // AT4G06746.1
GO:0046394	P	carboxylic acid biosynthetic process	7	363	417	37767	0.11	1	// AT4G11030.1 // AT1G43800.1 // AT1G15360.1 // AT1G70560.1 // AT4G26260.1 // AT1G04580.1 // AT2G39800.1
GO:0043412	P	macromolecule modification	12	363	1636	37767	0.86	1	// AT4G21400.1 // AT5G61350.1 // AT2G16750.1 // AT5G12000.1 // AT2G07040.1 // AT4G14780.1 // AT2G18470.1 // AT3G45180.1 // AT1G60190.1 // AT4G11460.1 // AT1G65790.1 // AT1G21270.1
GO:0006355	P	regulation of transcription, DNA-dependent	12	363	987	37767	0.25	1	// AT4G39250.1 // AT2G21650.1 // AT1G35490.1 // AT1G15360.1 // AT2G42830.1 // AT4G05100.1 // AT4G17490.1 // AT5G60140.1 // AT5G53980.1 // AT4G36570.1 // AT4G37260.1 // AT4G06746.1
GO:0010556	P	regulation of macromolecule biosynthetic process	21	363	1843	37767	0.24	1	// AT4G39250.1 // AT5G17300.1 // AT4G36570.1 // AT4G30180.1 // AT5G53980.1 // AT3G10040.1 // AT1G35490.1 // AT2G21650.1 // AT1G15360.1 // AT5G37260.1 // AT3G21330.1 // AT2G42830.1 // AT4G05100.1 // AT4G17490.1 // AT5G60140.1 // AT3G21880.1 // AT2G43140.1 // AT2G46970.1 // AT4G21440.1 // AT4G37260.1 // AT4G06746.1
GO:0006350	P	transcription	21	363	1923	37767	0.31	1	// AT4G39250.1 // AT5G17300.1 // AT4G36570.1 // AT4G30180.1 // AT5G53980.1 // AT3G10040.1 // AT1G35490.1 // AT2G21650.1 // AT1G15360.1 // AT5G37260.1 // AT3G21330.1 // AT2G42830.1 // AT4G05100.1 // AT4G17490.1 // AT5G60140.1 // AT3G21880.1 // AT2G43140.1 // AT2G46970.1 // AT4G21440.1 // AT4G37260.1 // AT4G06746.1
GO:0006351	P	transcription, DNA-dependent	12	363	1039	37767	0.3	1	// AT4G39250.1 // AT2G21650.1 // AT1G35490.1 // AT1G15360.1 // AT2G42830.1 // AT4G05100.1 // AT4G17490.1 // AT5G60140.1 // AT5G53980.1 // AT4G36570.1 // AT4G37260.1 // AT4G06746.1
GO:0006631	P	fatty acid metabolic process	5	363	225	37767	0.07	1	// AT1G01280.1 // AT2G11810.1 // AT1G43800.1 // AT4G11030.1 // AT1G15360.1
GO:0032774	P	RNA biosynthetic process	12	363	1040	37767	0.3	1	// AT4G39250.1 // AT2G21650.1 // AT1G35490.1 // AT1G15360.1 // AT2G42830.1 // AT4G05100.1 // AT4G17490.1 // AT5G60140.1 // AT5G53980.1 // AT4G36570.1 // AT4G37260.1 // AT4G06746.1
GO:0009314	P	response to radiation	7	363	613	37767	0.38	1	// AT4G14690.1 // AT3G47340.1 // AT5G15960.1 // AT1G70560.1 // AT3G25050.1 // AT5G53980.1 // AT2G46970.1
GO:0030154	P	cell differentiation	7	363	355	37767	0.059	1	// AT4G18960.1 // AT5G14380.1 // AT2G17950.1 // AT2G07040.1 // AT1G70560.1 // AT3G01700.1 // AT4G24972.1
GO:0009791	P	post-embryonic development	10	363	705	37767	0.15	1	// AT2G21650.1 // AT4G18960.1 // AT1G70560.1 // AT3G25050.1 // AT5G49360.1 // AT2G42830.1 // AT4G14550.1 // AT5G37260.1 // AT4G24972.1 // AT4G13560.1
GO:0044249	P	cellular biosynthetic process	43	363	4925	37767	0.77	1	// AT1G76470.1 // AT1G43800.1 // AT3G10040.1 // AT3G21880.1 // AT1G15360.1 // AT5G37260.1 // AT2G23800.1 // AT4G17490.1 // AT4G30180.1 // AT2G39800.1 // AT4G21440.1 // AT5G09500.1 // AT4G14690.1 // AT1G70560.1 // AT4G08040.1 // AT4G36570.1 // AT2G42830.1 // AT4G26260.1 // AT5G60140.1 // AT3G03540.1 // AT5G53980.1 // AT3G01020.1 // AT1G71770.1 // AT3G25820.1 // AT4G06746.1 // AT4G39250.1 // AT5G17…
GO:0034641	P	cellular nitrogen compound metabolic process	5	363	506	37767	0.54	1	// AT4G08040.1 // AT1G70560.1 // AT2G39800.1 // AT4G14690.1 // AT3G47340.1
GO:0009416	P	response to light stimulus	7	363	596	37767	0.35	1	// AT4G14690.1 // AT3G47340.1 // AT5G15960.1 // AT1G70560.1 // AT3G25050.1 // AT5G53980.1 // AT2G46970.1
GO:0009414	P	response to water deprivation	5	363	229	37767	0.074	1	// AT5G15960.1 // AT2G39800.1 // AT5G66400.1 // AT1G15360.1 // AT3G02480.1
GO:0009415	P	response to water	5	363	240	37767	0.086	1	// AT5G15960.1 // AT2G39800.1 // AT5G66400.1 // AT1G15360.1 // AT3G02480.1
GO:0009651	P	response to salt stress	6	363	366	37767	0.15	1	// AT5G37260.1 // AT4G05100.1 // AT4G16260.1 // AT2G39800.1 // AT4G21440.1 // AT4G37260.1
GO:0006139	P	nucleobase, nucleoside, nucleotide and nucleic acid metabolic process	26	363	3198	37767	0.84	1	// AT3G10040.1 // AT3G21880.1 // AT1G15360.1 // AT5G37260.1 // AT4G17490.1 // AT4G30180.1 // AT4G21440.1 // AT3G12430.1 // AT4G36570.1 // AT2G42830.1 // AT1G22760.1 // AT5G60140.1 // AT5G53980.1 // AT1G71770.1 // AT4G06746.1 // AT4G39250.1 // AT5G17300.1 // AT3G08560.1 // AT1G35490.1 // AT2G22950.1 // AT3G21330.1 // AT2G43140.1 // AT4G37260.1 // AT2G21650.1 // AT4G05100.1 // AT2G46970.1
GO:0006508	P	proteolysis	9	363	810	37767	0.38	1	// AT2G45040.1 // AT4G21630.1 // AT5G59810.1 // AT5G22980.1 // AT4G22050.1 // AT5G59120.1 // AT2G23010.1 // AT4G25110.1 // AT5G45890.1
GO:0048608	P	reproductive structure development	9	363	978	37767	0.6	1	// AT2G21650.1 // AT4G18960.1 // AT1G70560.1 // AT3G25050.1 // AT5G49360.1 // AT2G42830.1 // AT5G37260.1 // AT4G24972.1 // AT4G13560.1
GO:0044238	P	primary metabolic process	72	363	8995	37767	0.97	1	// AT4G21400.1 // AT1G43800.1 // AT1G76470.1 // AT5G12000.1 // AT2G23010.1 // AT1G15360.1 // AT5G37260.1 // AT2G23800.1 // AT4G17490.1 // AT5G48140.1 // AT4G11030.1 // AT4G30180.1 // AT5G45890.1 // AT2G39800.1 // AT4G21440.1 // AT2G16750.1 // AT4G21630.1 // AT5G09500.1 // AT4G10260.1 // AT3G23510.1 // AT1G21270.1 // AT4G08040.1 // AT2G42830.1 // AT2G18470.1 // AT4G22050.1 // AT5G59120.1 // AT3G20…
GO:0043687	P	post-translational protein modification	11	363	1248	37767	0.66	1	// AT4G21400.1 // AT5G61350.1 // AT2G16750.1 // AT5G12000.1 // AT2G07040.1 // AT4G14780.1 // AT2G18470.1 // AT1G60190.1 // AT4G11460.1 // AT1G65790.1 // AT1G21270.1
GO:0009987	P	cellular process	94	363	11684	37767	0.98	1	// AT1G69260.1 // AT1G08730.1 // AT3G20520.1 // AT3G11980.1 // AT5G59370.1 // AT5G60140.1 // AT4G06746.1 // AT5G17300.1 // AT2G17950.1 // AT3G09922.1 // AT4G33040.1 // AT2G43140.1 // AT2G21650.1 // AT3G21500.1 // AT5G65690.1 // AT4G29340.1 // AT1G60740.1 // AT4G18960.1 // AT3G10040.1 // AT3G05960.1 // AT4G11030.1 // AT1G21270.1 // AT4G08040.1 // AT3G12430.1 // AT4G36570.1 // AT2G42830.1 // AT4G26…
GO:0044255	P	cellular lipid metabolic process	10	363	618	37767	0.08	1	// AT3G21500.1 // AT1G43800.1 // AT2G11810.1 // AT1G15360.1 // AT1G04580.1 // AT2G23800.1 // AT4G11030.1 // AT3G03540.1 // AT3G25820.1 // AT1G01280.1
GO:0006082	P	organic acid metabolic process	13	363	860	37767	0.077	1	// AT5G25880.1 // AT4G11030.1 // AT1G43800.1 // AT1G70560.1 // AT4G08040.1 // AT3G47340.1 // AT2G11810.1 // AT1G15360.1 // AT5G65690.1 // AT4G26260.1 // AT1G04580.1 // AT1G01280.1 // AT2G39800.1
GO:0007242	P	intracellular signaling cascade	6	363	659	37767	0.61	1	// AT1G69260.1 // AT1G15360.1 // AT5G15960.1 // AT4G24580.1 // AT2G46970.1 // AT4G17490.1
GO:0051252	P	regulation of RNA metabolic process	12	363	996	37767	0.26	1	// AT4G39250.1 // AT2G21650.1 // AT1G35490.1 // AT1G15360.1 // AT2G42830.1 // AT4G05100.1 // AT4G17490.1 // AT5G60140.1 // AT5G53980.1 // AT4G36570.1 // AT4G37260.1 // AT4G06746.1
GO:0043170	P	macromolecule metabolic process	47	363	7127	37767	1	1	// AT4G21400.1 // AT2G45040.1 // AT5G12000.1 // AT2G23010.1 // AT1G15360.1 // AT5G37260.1 // AT4G17490.1 // AT4G30180.1 // AT5G45890.1 // AT4G21440.1 // AT2G16750.1 // AT4G21630.1 // AT5G09500.1 // AT1G21270.1 // AT2G18470.1 // AT4G22050.1 // AT5G59120.1 // AT4G36570.1 // AT2G42830.1 // AT1G22760.1 // AT1G60190.1 // AT5G60140.1 // AT5G53980.1 // AT1G71770.1 // AT3G21880.1 // AT3G10040.1 // AT4G06…
GO:0048731	P	system development	8	363	839	37767	0.56	1	// AT4G18960.1 // AT1G70560.1 // AT2G17950.1 // AT4G14550.1 // AT2G42830.1 // AT4G24972.1 // AT5G45890.1 // AT2G39800.1
GO:0031326	P	regulation of cellular biosynthetic process	22	363	1881	37767	0.2	1	// AT3G10040.1 // AT3G21880.1 // AT1G15360.1 // AT5G37260.1 // AT4G17490.1 // AT4G30180.1 // AT4G36570.1 // AT4G14690.1 // AT4G21440.1 // AT2G42830.1 // AT5G60140.1 // AT5G53980.1 // AT4G06746.1 // AT4G39250.1 // AT5G17300.1 // AT1G35490.1 // AT3G21330.1 // AT2G43140.1 // AT4G37260.1 // AT2G21650.1 // AT4G05100.1 // AT2G46970.1
GO:0031323	P	regulation of cellular metabolic process	22	363	2036	37767	0.32	1	// AT3G10040.1 // AT3G21880.1 // AT1G15360.1 // AT5G37260.1 // AT4G17490.1 // AT4G30180.1 // AT4G36570.1 // AT4G14690.1 // AT4G21440.1 // AT2G42830.1 // AT5G60140.1 // AT5G53980.1 // AT4G06746.1 // AT4G39250.1 // AT5G17300.1 // AT1G35490.1 // AT3G21330.1 // AT2G43140.1 // AT4G37260.1 // AT2G21650.1 // AT4G05100.1 // AT2G46970.1
GO:0019752	P	carboxylic acid metabolic process	13	363	859	37767	0.076	1	// AT5G25880.1 // AT4G11030.1 // AT1G43800.1 // AT1G70560.1 // AT4G08040.1 // AT3G47340.1 // AT2G11810.1 // AT1G15360.1 // AT5G65690.1 // AT4G26260.1 // AT1G04580.1 // AT1G01280.1 // AT2G39800.1
GO:0045449	P	regulation of transcription	21	363	1802	37767	0.21	1	// AT4G39250.1 // AT5G17300.1 // AT4G36570.1 // AT4G30180.1 // AT5G53980.1 // AT3G10040.1 // AT1G35490.1 // AT2G21650.1 // AT1G15360.1 // AT5G37260.1 // AT3G21330.1 // AT2G42830.1 // AT4G05100.1 // AT4G17490.1 // AT5G60140.1 // AT3G21880.1 // AT2G43140.1 // AT2G46970.1 // AT4G21440.1 // AT4G37260.1 // AT4G06746.1
GO:0040007	P	growth	5	363	340	37767	0.23	1	// AT1G20190.1 // AT5G14380.1 // AT1G21270.1 // AT3G01700.1 // AT2G07040.1
GO:0010467	P	gene expression	24	363	3962	37767	1	1	// AT3G10040.1 // AT3G21880.1 // AT1G15360.1 // AT5G37260.1 // AT4G17490.1 // AT4G30180.1 // AT4G36570.1 // AT5G09500.1 // AT4G21440.1 // AT2G42830.1 // AT1G22760.1 // AT5G60140.1 // AT5G53980.1 // AT1G71770.1 // AT4G06746.1 // AT4G39250.1 // AT5G17300.1 // AT1G35490.1 // AT3G21330.1 // AT2G43140.1 // AT4G37260.1 // AT2G21650.1 // AT4G05100.1 // AT2G46970.1
GO:0009908	P	flower development	5	363	377	37767	0.3	1	// AT4G24972.1 // AT2G42830.1 // AT1G70560.1 // AT4G18960.1 // AT5G37260.1
GO:0010468	P	regulation of gene expression	21	363	2001	37767	0.37	1	// AT4G39250.1 // AT5G17300.1 // AT4G36570.1 // AT4G30180.1 // AT5G53980.1 // AT3G10040.1 // AT1G35490.1 // AT2G21650.1 // AT1G15360.1 // AT5G37260.1 // AT3G21330.1 // AT2G42830.1 // AT4G05100.1 // AT4G17490.1 // AT5G60140.1 // AT3G21880.1 // AT2G43140.1 // AT2G46970.1 // AT4G21440.1 // AT4G37260.1 // AT4G06746.1
GO:0006468	P	protein amino acid phosphorylation	10	363	946	37767	0.43	1	// AT4G21400.1 // AT5G61350.1 // AT2G16750.1 // AT5G12000.1 // AT2G07040.1 // AT4G14780.1 // AT2G18470.1 // AT4G11460.1 // AT1G65790.1 // AT1G21270.1
GO:0019219	P	regulation of nucleobase, nucleoside, nucleotide and nucleic acid metabolic process	21	363	1847	37767	0.25	1	// AT4G39250.1 // AT5G17300.1 // AT4G36570.1 // AT4G30180.1 // AT5G53980.1 // AT3G10040.1 // AT1G35490.1 // AT2G21650.1 // AT1G15360.1 // AT5G37260.1 // AT3G21330.1 // AT2G42830.1 // AT4G05100.1 // AT4G17490.1 // AT5G60140.1 // AT3G21880.1 // AT2G43140.1 // AT2G46970.1 // AT4G21440.1 // AT4G37260.1 // AT4G06746.1
GO:0006464	P	protein modification process	12	363	1474	37767	0.76	1	// AT4G21400.1 // AT5G61350.1 // AT2G16750.1 // AT5G12000.1 // AT2G07040.1 // AT4G14780.1 // AT2G18470.1 // AT3G45180.1 // AT1G60190.1 // AT4G11460.1 // AT1G65790.1 // AT1G21270.1
GO:0022414	P	reproductive process	16	363	1161	37767	0.1	1	// AT5G49360.1 // AT5G07530.1 // AT4G18960.1 // AT2G07040.1 // AT2G42830.1 // AT5G14380.1 // AT2G21650.1 // AT5G37260.1 // AT3G12000.1 // AT4G24580.1 // AT3G01700.1 // AT3G25050.1 // AT4G24972.1 // AT4G13560.1 // AT1G65790.1 // AT1G70560.1
GO:0009058	P	biosynthetic process	44	363	5118	37767	0.81	1	// AT1G76470.1 // AT1G43800.1 // AT3G10040.1 // AT3G21880.1 // AT1G15360.1 // AT5G37260.1 // AT2G23800.1 // AT4G17490.1 // AT4G30180.1 // AT2G39800.1 // AT4G21440.1 // AT5G09500.1 // AT4G14690.1 // AT3G23510.1 // AT1G70560.1 // AT4G08040.1 // AT4G36570.1 // AT2G42830.1 // AT4G26260.1 // AT5G60140.1 // AT3G03540.1 // AT5G53980.1 // AT3G01020.1 // AT1G71770.1 // AT3G25820.1 // AT4G06746.1 // AT4G39…
GO:0009059	P	macromolecule biosynthetic process	24	363	3685	37767	0.99	1	// AT3G10040.1 // AT3G21880.1 // AT1G15360.1 // AT5G37260.1 // AT4G17490.1 // AT4G30180.1 // AT4G36570.1 // AT5G09500.1 // AT4G21440.1 // AT2G42830.1 // AT5G60140.1 // AT5G53980.1 // AT1G71770.1 // AT4G06746.1 // AT4G39250.1 // AT5G17300.1 // AT1G35490.1 // AT3G21330.1 // AT2G43140.1 // AT4G37260.1 // AT2G21650.1 // AT4G05100.1 // AT2G13680.1 // AT2G46970.1
GO:0051171	P	regulation of nitrogen compound metabolic process	22	363	1888	37767	0.21	1	// AT3G10040.1 // AT3G21880.1 // AT1G15360.1 // AT5G37260.1 // AT4G17490.1 // AT4G30180.1 // AT4G36570.1 // AT4G14690.1 // AT4G21440.1 // AT2G42830.1 // AT5G60140.1 // AT5G53980.1 // AT4G06746.1 // AT4G39250.1 // AT5G17300.1 // AT1G35490.1 // AT3G21330.1 // AT2G43140.1 // AT4G37260.1 // AT2G21650.1 // AT4G05100.1 // AT2G46970.1
GO:0016049	P	cell growth	5	363	265	37767	0.12	1	// AT1G20190.1 // AT5G14380.1 // AT1G21270.1 // AT3G01700.1 // AT2G07040.1
GO:0019222	P	regulation of metabolic process	22	363	2210	37767	0.46	1	// AT3G10040.1 // AT3G21880.1 // AT1G15360.1 // AT5G37260.1 // AT4G17490.1 // AT4G30180.1 // AT4G36570.1 // AT4G14690.1 // AT4G21440.1 // AT2G42830.1 // AT5G60140.1 // AT5G53980.1 // AT4G06746.1 // AT4G39250.1 // AT5G17300.1 // AT1G35490.1 // AT3G21330.1 // AT2G43140.1 // AT4G37260.1 // AT2G21650.1 // AT4G05100.1 // AT2G46970.1
GO:0009628	P	response to abiotic stimulus	20	363	1471	37767	0.08	1	// AT4G14690.1 // AT3G02480.1 // AT3G25050.1 // AT1G07645.1 // AT1G53540.1 // AT5G57560.1 // AT1G15360.1 // AT5G37260.1 // AT5G15960.1 // AT1G70560.1 // AT4G05100.1 // AT4G16260.1 // AT4G21440.1 // AT3G47340.1 // AT1G77120.1 // AT2G39800.1 // AT2G46970.1 // AT5G66400.1 // AT4G37260.1 // AT5G53980.1
GO:0005975	P	carbohydrate metabolic process	11	363	866	37767	0.22	1	// AT3G07820.1 // AT4G10260.1 // AT1G21270.1 // AT4G26830.1 // AT2G23900.1 // AT3G20520.1 // AT5G65690.1 // AT1G02790.1 // AT5G48140.1 // AT1G04580.1 // AT2G13680.1
GO:0042180	P	cellular ketone metabolic process	13	363	882	37767	0.089	1	// AT5G25880.1 // AT4G11030.1 // AT1G43800.1 // AT1G70560.1 // AT4G08040.1 // AT3G47340.1 // AT2G11810.1 // AT1G15360.1 // AT5G65690.1 // AT4G26260.1 // AT1G04580.1 // AT1G01280.1 // AT2G39800.1
GO:0048856	P	anatomical structure development	23	363	1726	37767	0.075	1	// AT4G18960.1 // AT5G37260.1 // AT3G28780.1 // AT2G39800.1 // AT4G13560.1 // AT2G42830.1 // AT1G20190.1 // AT3G11980.1 // AT1G70560.1 // AT1G01280.1 // AT2G07040.1 // AT2G17950.1 // AT3G25050.1 // AT5G49360.1 // AT4G24580.1 // AT3G01700.1 // AT5G45890.1 // AT4G14550.1 // AT2G21650.1 // AT5G14380.1 // AT1G21270.1 // AT2G13680.1 // AT4G24972.1
GO:0044237	P	cellular metabolic process	64	363	8722	37767	1	1	// AT4G21400.1 // AT1G43800.1 // AT1G76470.1 // AT5G12000.1 // AT3G21880.1 // AT1G15360.1 // AT5G37260.1 // AT2G23800.1 // AT4G17490.1 // AT4G30180.1 // AT2G01918.1 // AT2G39800.1 // AT4G21440.1 // AT2G16750.1 // AT5G09500.1 // AT4G14690.1 // AT4G10260.1 // AT1G21270.1 // AT4G08040.1 // AT3G12430.1 // AT2G18470.1 // AT3G45180.1 // AT3G20520.1 // AT4G36570.1 // AT2G42830.1 // AT1G22760.1 // AT1G60…
GO:0006796	P	phosphate metabolic process	11	363	1178	37767	0.58	1	// AT4G21400.1 // AT5G61350.1 // AT2G07040.1 // AT3G08560.1 // AT5G12000.1 // AT1G21270.1 // AT4G14780.1 // AT2G18470.1 // AT4G11460.1 // AT1G65790.1 // AT2G16750.1
GO:0044085	P	cellular component biogenesis	5	363	571	37767	0.64	1	// AT3G11980.1 // AT3G25050.1 // AT3G28780.1 // AT2G13680.1 // AT1G01280.1
GO:0006793	P	phosphorus metabolic process	11	363	1179	37767	0.58	1	// AT4G21400.1 // AT5G61350.1 // AT2G07040.1 // AT3G08560.1 // AT5G12000.1 // AT1G21270.1 // AT4G14780.1 // AT2G18470.1 // AT4G11460.1 // AT1G65790.1 // AT2G16750.1
Molecular process
GO:0008289	F	lipid binding	15	363	323	37767	1.1e-06	0.00041	// AT1G66850.1 // AT4G33355.1 // AT5G07530.1 // AT5G07510.1 // AT4G08670.1 // AT1G18280.1 // AT5G07550.1 // AT1G62510.1 // AT4G12470.1 // AT5G07520.1 // AT4G15160.1 // AT5G07560.1 // AT4G12500.1 // AT5G07230.1 // AT4G24580.1
GO:0016798	F	hydrolase activity, acting on glycosyl bonds	16	363	526	37767	7.6e-05	0.014	// AT3G07820.1 // AT2G44460.1 // AT2G36190.1 // AT3G25050.1 // AT2G23900.1 // AT5G49360.1 // AT4G26830.1 // AT5G57560.1 // AT1G02790.1 // AT5G48140.1 // AT5G20710.1 // AT3G57520.1 // AT5G47000.1 // AT3G13750.1 // AT4G16260.1 // AT5G09730.1
GO:0004553	F	hydrolase activity, hydrolyzing O-glycosyl compounds	14	363	476	37767	0.00029	0.037	// AT3G07820.1 // AT2G44460.1 // AT2G36190.1 // AT5G09730.1 // AT2G23900.1 // AT5G49360.1 // AT4G26830.1 // AT1G02790.1 // AT5G48140.1 // AT5G20710.1 // AT3G57520.1 // AT5G47000.1 // AT3G13750.1 // AT4G16260.1
GO:0030599	F	pectinesterase activity	7	363	144	37767	0.00064	0.061	// AT3G62170.1 // AT2G47050.1 // AT2G26450.1 // AT5G07410.1 // AT5G49180.1 // AT2G47030.1 // AT3G05610.1
GO:0016209	F	antioxidant activity	7	363	150	37767	0.0008	0.061	// AT4G30170.1 // AT4G31870.1 // AT5G19890.1 // AT1G49570.1 // AT5G47000.1 // AT4G11290.1 // AT1G60740.1
GO:0016684	F	oxidoreductase activity, acting on peroxide as acceptor	6	363	127	37767	0.0018	0.096	// AT4G30170.1 // AT4G31870.1 // AT1G49570.1 // AT5G47000.1 // AT4G11290.1 // AT5G19890.1
GO:0004601	F	peroxidase activity	6	363	127	37767	0.0018	0.096	// AT4G30170.1 // AT4G31870.1 // AT1G49570.1 // AT5G47000.1 // AT4G11290.1 // AT5G19890.1
GO:0016787	F	hydrolase activity	50	363	3468	37767	0.0028	0.11	// AT5G66020.1 // AT3G62170.1 // AT1G54560.1 // AT4G16260.1 // AT5G48140.1 // AT5G20710.1 // AT3G57520.1 // AT5G09730.1 // AT3G05610.1 // AT1G56360.1 // AT2G44460.1 // AT4G21630.1 // AT1G70290.1 // AT4G36350.1 // AT3G28510.1 // AT3G12430.1 // AT4G22050.1 // AT2G47050.1 // AT4G25750.1 // AT3G20520.1 // AT2G46880.1 // AT5G49180.1 // AT3G25050.1 // AT1G08730.1 // AT2G18130.1 // AT1G23240.1 // AT2G45…
GO:0020037	F	heme binding	5	363	97	37767	0.003	0.11	// AT4G30170.1 // AT5G19890.1 // AT3G61035.1 // AT1G49570.1 // AT4G11290.1
GO:0046906	F	tetrapyrrole binding	6	363	136	37767	0.0025	0.11	// AT4G30170.1 // AT4G14690.1 // AT1G49570.1 // AT3G61035.1 // AT4G11290.1 // AT5G19890.1
GO:0022804	F	active transmembrane transporter activity	14	363	664	37767	0.006	0.19	// AT1G71680.1 // AT1G80660.1 // AT1G07340.1 // AT3G08560.1 // AT1G05580.1 // AT2G22950.1 // AT4G25750.1 // AT4G35180.1 // AT4G16160.1 // AT3G05960.1 // AT3G52310.1 // AT4G32510.1 // AT3G54700.1 // AT4G28700.1
GO:0005509	F	calcium ion binding	7	363	215	37767	0.0056	0.19	// AT1G23240.1 // AT1G32250.1 // AT3G59450.1 // AT3G03430.1 // AT2G01918.1 // AT5G17480.1 // AT1G23250.1
GO:0022892	F	substrate-specific transporter activity	19	363	1059	37767	0.008	0.22	// AT1G71680.1 // AT4G28700.1 // AT4G26590.1 // AT1G07340.1 // AT3G08560.1 // AT1G05580.1 // AT2G22950.1 // AT4G01470.1 // AT1G80660.1 // AT4G16160.1 // AT4G36490.1 // AT1G22150.1 // AT5G37810.1 // AT4G32510.1 // AT2G46440.1 // AT3G05960.1 // AT2G16060.1 // AT3G54700.1 // AT4G35180.1
GO:0004857	F	enzyme inhibitor activity	6	363	173	37767	0.0076	0.22	// AT2G47050.1 // AT2G26450.1 // AT4G24640.1 // AT1G72290.1 // AT5G49180.1 // AT3G05610.1
GO:0009055	F	electron carrier activity	8	363	294	37767	0.0088	0.22	// AT4G30170.1 // AT3G61035.1 // AT3G23510.1 // AT1G49570.1 // AT1G01980.1 // AT4G33040.1 // AT4G11290.1 // AT5G19890.1
GO:0016491	F	oxidoreductase activity	23	363	1463	37767	0.016	0.37	// AT1G76470.1 // AT4G30170.1 // AT1G43800.1 // AT1G26320.1 // AT1G49570.1 // AT1G14520.1 // AT2G39800.1 // AT3G23510.1 // AT1G32300.1 // AT3G11980.1 // AT4G26260.1 // AT1G77120.1 // AT5G02540.1 // AT1G01280.1 // AT4G31870.1 // AT5G47000.1 // AT4G33040.1 // AT4G11290.1 // AT1G04580.1 // AT5G19890.1 // AT5G25880.1 // AT3G61035.1 // AT1G60740.1
GO:0022891	F	substrate-specific transmembrane transporter activity	16	363	908	37767	0.017	0.37	// AT1G71680.1 // AT4G28700.1 // AT1G07340.1 // AT3G08560.1 // AT1G05580.1 // AT2G22950.1 // AT1G80660.1 // AT4G16160.1 // AT4G01470.1 // AT1G22150.1 // AT5G37810.1 // AT4G32510.1 // AT2G46440.1 // AT3G05960.1 // AT3G54700.1 // AT4G35180.1
GO:0005215	F	transporter activity	23	363	1477	37767	0.018	0.37	// AT1G71680.1 // AT4G28700.1 // AT4G27970.1 // AT2G02020.1 // AT4G16160.1 // AT4G01470.1 // AT3G05960.1 // AT5G37810.1 // AT1G07340.1 // AT1G05580.1 // AT4G25750.1 // AT1G22150.1 // AT4G32510.1 // AT3G54700.1 // AT1G80660.1 // AT4G26590.1 // AT3G08560.1 // AT2G22950.1 // AT4G36490.1 // AT2G46440.1 // AT4G35180.1 // AT3G52310.1 // AT2G16060.1
GO:0005506	F	iron ion binding	5	363	161	37767	0.022	0.43	// AT4G30170.1 // AT5G19890.1 // AT3G61035.1 // AT1G49570.1 // AT4G11290.1
GO:0004091	F	carboxylesterase activity	8	363	378	37767	0.033	0.47	// AT3G62170.1 // AT1G75930.1 // AT2G47050.1 // AT2G26450.1 // AT5G07410.1 // AT5G49180.1 // AT2G47030.1 // AT3G05610.1
GO:0015405	F	P-P-bond-hydrolysis-driven transmembrane transporter activity	6	363	243	37767	0.033	0.47	// AT1G80660.1 // AT3G08560.1 // AT2G22950.1 // AT4G25750.1 // AT4G16160.1 // AT3G52310.1
GO:0042626	F	ATPase activity, coupled to transmembrane movement of substances	5	363	181	37767	0.033	0.47	// AT3G08560.1 // AT3G52310.1 // AT2G22950.1 // AT4G25750.1 // AT1G80660.1
GO:0015399	F	primary active transmembrane transporter activity	6	363	244	37767	0.033	0.47	// AT1G80660.1 // AT3G08560.1 // AT2G22950.1 // AT4G25750.1 // AT4G16160.1 // AT3G52310.1
GO:0003824	F	catalytic activity	109	363	9638	37767	0.03	0.47	// AT5G66020.1 // AT1G26320.1 // AT4G30170.1 // AT5G61160.1 // AT5G09730.1 // AT1G56360.1 // AT4G22050.1 // AT2G47050.1 // AT3G20520.1 // AT3G11980.1 // AT5G11610.1 // AT2G23010.1 // AT1G80660.1 // AT1G02790.1 // AT4G33040.1 // AT4G01950.1 // AT3G21500.1 // AT2G26450.1 // AT5G65690.1 // AT3G56600.1 // AT2G36190.1 // AT1G60740.1 // AT3G62170.1 // AT5G20710.1 // AT3G57520.1 // AT3G05610.1 // AT2G44…
GO:0043492	F	ATPase activity, coupled to movement of substances	5	363	181	37767	0.033	0.47	// AT3G08560.1 // AT3G52310.1 // AT2G22950.1 // AT4G25750.1 // AT1G80660.1
GO:0022857	F	transmembrane transporter activity	18	363	1128	37767	0.027	0.47	// AT1G71680.1 // AT4G28700.1 // AT1G07340.1 // AT3G08560.1 // AT1G05580.1 // AT2G22950.1 // AT4G25750.1 // AT1G80660.1 // AT4G16160.1 // AT4G01470.1 // AT1G22150.1 // AT5G37810.1 // AT4G32510.1 // AT2G46440.1 // AT3G52310.1 // AT3G05960.1 // AT3G54700.1 // AT4G35180.1
GO:0030234	F	enzyme regulator activity	8	363	367	37767	0.028	0.47	// AT5G49180.1 // AT2G47050.1 // AT2G26450.1 // AT4G24640.1 // AT1G72290.1 // AT1G62450.1 // AT4G24580.1 // AT3G05610.1
GO:0016820	F	hydrolase activity, acting on acid anhydrides, catalyzing transmembrane movement of substances	5	363	183	37767	0.035	0.47	// AT3G08560.1 // AT3G52310.1 // AT2G22950.1 // AT4G25750.1 // AT1G80660.1
GO:0016788	F	hydrolase activity, acting on ester bonds	18	363	1200	37767	0.045	0.59	// AT1G23240.1 // AT5G66020.1 // AT4G36350.1 // AT3G62170.1 // AT5G49180.1 // AT1G75930.1 // AT2G47050.1 // AT2G26450.1 // AT3G20520.1 // AT5G07410.1 // AT2G46880.1 // AT1G70290.1 // AT2G47030.1 // AT3G03540.1 // AT3G12430.1 // AT2G18130.1 // AT3G05610.1 // AT1G56360.1
GO:0016758	F	transferase activity, transferring hexosyl groups	7	363	340	37767	0.05	0.63	// AT1G70290.1 // AT3G25050.1 // AT2G11810.1 // AT4G16590.1 // AT5G57560.1 // AT2G13680.1 // AT2G29740.1
GO:0015075	F	ion transmembrane transporter activity	11	363	655	37767	0.056	0.68	// AT4G28700.1 // AT1G07340.1 // AT3G08560.1 // AT1G05580.1 // AT2G22950.1 // AT1G22150.1 // AT3G05960.1 // AT4G32510.1 // AT2G46440.1 // AT3G54700.1 // AT1G80660.1
GO:0008324	F	cation transmembrane transporter activity	9	363	503	37767	0.058	0.69	// AT4G28700.1 // AT1G07340.1 // AT3G08560.1 // AT1G05580.1 // AT2G22950.1 // AT3G05960.1 // AT2G46440.1 // AT3G54700.1 // AT1G80660.1
GO:0016829	F	lyase activity	8	363	430	37767	0.06	0.69	// AT1G30350.1 // AT1G70560.1 // AT4G08040.1 // AT4G22080.1 // AT5G65690.1 // AT3G01270.1 // AT4G33070.1 // AT3G25820.1
GO:0022890	F	inorganic cation transmembrane transporter activity	5	363	228	37767	0.073	0.81	// AT3G08560.1 // AT1G05580.1 // AT2G22950.1 // AT4G28700.1 // AT1G80660.1
GO:0005516	F	calmodulin binding	5	363	231	37767	0.076	0.82	// AT1G75580.1 // AT3G43120.1 // AT2G46440.1 // AT2G22950.1 // AT2G26410.1
GO:0060089	F	molecular transducer activity	7	363	422	37767	0.12	1	// AT1G65790.1 // AT1G28270.1 // AT1G61563.1 // AT5G41550.1 // AT3G25170.1 // AT2G22055.1 // AT1G61566.1
GO:0005198	F	structural molecule activity	7	363	659	37767	0.45	1	// AT1G21310.1 // AT5G09500.1 // AT3G22142.1 // AT1G76930.1 // AT5G59370.1 // AT4G15160.1 // AT3G01020.1
GO:0000166	F	nucleotide binding	11	363	2267	37767	1	1	// AT2G16750.1 // AT3G48840.1 // AT1G72960.1 // AT2G07040.1 // AT2G18470.1 // AT1G32300.1 // AT5G41550.1 // AT3G28510.1 // AT5G65690.1 // AT1G21320.1 // AT2G46440.1
GO:0016740	F	transferase activity	29	363	3321	37767	0.73	1	// AT4G21400.1 // AT5G12000.1 // AT4G16590.1 // AT2G23800.1 // AT4G01950.1 // AT5G61160.1 // AT2G16750.1 // AT1G70290.1 // AT4G10260.1 // AT3G23510.1 // AT1G21270.1 // AT2G18470.1 // AT5G45820.1 // AT1G70560.1 // AT3G25050.1 // AT3G29040.1 // AT2G07040.1 // AT1G75930.1 // AT4G14780.1 // AT5G61350.1 // AT3G21500.1 // AT4G11460.1 // AT1G65790.1 // AT2G11810.1 // AT5G57560.1 // AT2G13680.1 // AT3G56…
GO:0042578	F	phosphoric ester hydrolase activity	8	363	481	37767	0.098	1	// AT5G66020.1 // AT4G36350.1 // AT3G20520.1 // AT2G46880.1 // AT1G70290.1 // AT3G03540.1 // AT1G56360.1 // AT2G18130.1
GO:0016818	F	hydrolase activity, acting on acid anhydrides, in phosphorus-containing anhydrides	10	363	837	37767	0.29	1	// AT1G80660.1 // AT3G28510.1 // AT3G08560.1 // AT2G22950.1 // AT5G41550.1 // AT4G25750.1 // AT3G52310.1 // AT2G07560.1 // AT1G54560.1 // AT1G08730.1
GO:0019825	F	oxygen binding	5	363	255	37767	0.1	1	// AT5G25130.1 // AT4G20240.1 // AT2G46950.1 // AT2G16060.1 // AT1G01280.1
GO:0030554	F	adenyl nucleotide binding	7	363	1465	37767	0.99	1	// AT2G16750.1 // AT2G07040.1 // AT2G18470.1 // AT1G32300.1 // AT5G41550.1 // AT3G28510.1 // AT5G65690.1
GO:0016757	F	transferase activity, transferring glycosyl groups	7	363	544	37767	0.27	1	// AT1G70290.1 // AT3G25050.1 // AT2G11810.1 // AT4G16590.1 // AT5G57560.1 // AT2G13680.1 // AT2G29740.1
GO:0008270	F	zinc ion binding	8	363	1299	37767	0.93	1	// AT5G22920.1 // AT1G14200.1 // AT1G26320.1 // AT5G46650.1 // AT3G21880.1 // AT1G60190.1 // AT1G02610.1 // AT4G02075.1
GO:0005488	F	binding	106	363	11258	37767	0.62	1	// AT4G30170.1 // AT1G14200.1 // AT1G26320.1 // AT3G43120.1 // AT3G48840.1 // AT1G08730.1 // AT1G22130.1 // AT1G72960.1 // AT5G60140.1 // AT4G06746.1 // AT5G17300.1 // AT2G17950.1 // AT4G08670.1 // AT5G25130.1 // AT2G26410.1 // AT2G43140.1 // AT5G07230.1 // AT2G21650.1 // AT5G65690.1 // AT4G29340.1 // AT3G03430.1 // AT1G78160.1 // AT4G02075.1 // AT4G20240.1 // AT1G66850.1 // AT4G18960.1 // AT3G10…
GO:0016887	F	ATPase activity	7	363	482	37767	0.19	1	// AT1G80660.1 // AT3G28510.1 // AT3G08560.1 // AT2G22950.1 // AT4G25750.1 // AT3G52310.1 // AT2G07560.1
GO:0003677	F	DNA binding	28	363	2892	37767	0.51	1	// AT4G18960.1 // AT1G26330.1 // AT3G10040.1 // AT5G17300.1 // AT1G15360.1 // AT5G37260.1 // AT4G17490.1 // AT4G30180.1 // AT4G21440.1 // AT1G22130.1 // AT2G13570.1 // AT4G36570.1 // AT2G42830.1 // AT5G60140.1 // AT5G53980.1 // AT3G21880.1 // AT4G06746.1 // AT4G39250.1 // AT3G24520.1 // AT2G17950.1 // AT1G35490.1 // AT4G14550.1 // AT3G21330.1 // AT2G43140.1 // AT4G37260.1 // AT2G21650.1 // AT4G05…
GO:0042623	F	ATPase activity, coupled	5	363	359	37767	0.27	1	// AT3G08560.1 // AT3G52310.1 // AT2G22950.1 // AT4G25750.1 // AT1G80660.1
GO:0017076	F	purine nucleotide binding	7	363	1713	37767	1	1	// AT2G16750.1 // AT2G07040.1 // AT2G18470.1 // AT1G32300.1 // AT5G41550.1 // AT3G28510.1 // AT5G65690.1
GO:0005524	F	ATP binding	6	363	1377	37767	0.99	1	// AT2G16750.1 // AT3G28510.1 // AT2G18470.1 // AT2G07040.1 // AT5G41550.1 // AT5G65690.1
GO:0016301	F	kinase activity	14	363	1641	37767	0.71	1	// AT4G21400.1 // AT4G11460.1 // AT4G10260.1 // AT3G29040.1 // AT2G07040.1 // AT5G12000.1 // AT1G21270.1 // AT5G45820.1 // AT4G14780.1 // AT2G18470.1 // AT3G56600.1 // AT5G61350.1 // AT1G65790.1 // AT2G16750.1
GO:0043169	F	cation binding	24	363	2087	37767	0.21	1	// AT1G32250.1 // AT4G30170.1 // AT1G43800.1 // AT1G14200.1 // AT1G26320.1 // AT1G49570.1 // AT4G16260.1 // AT2G01918.1 // AT1G23250.1 // AT3G59450.1 // AT1G02610.1 // AT1G60190.1 // AT1G23240.1 // AT3G21880.1 // AT4G26830.1 // AT4G33070.1 // AT5G22920.1 // AT4G11290.1 // AT5G17480.1 // AT5G19890.1 // AT5G46650.1 // AT3G61035.1 // AT3G03430.1 // AT4G02075.1
GO:0016772	F	transferase activity, transferring phosphorus-containing groups	14	363	1887	37767	0.87	1	// AT4G21400.1 // AT4G11460.1 // AT4G10260.1 // AT3G29040.1 // AT2G07040.1 // AT5G12000.1 // AT1G21270.1 // AT5G45820.1 // AT4G14780.1 // AT2G18470.1 // AT3G56600.1 // AT5G61350.1 // AT1G65790.1 // AT2G16750.1
GO:0032555	F	purine ribonucleotide binding	6	363	1631	37767	1	1	// AT2G16750.1 // AT3G28510.1 // AT2G18470.1 // AT2G07040.1 // AT5G41550.1 // AT5G65690.1
GO:0032553	F	ribonucleotide binding	6	363	1631	37767	1	1	// AT2G16750.1 // AT3G28510.1 // AT2G18470.1 // AT2G07040.1 // AT5G41550.1 // AT5G65690.1
GO:0016791	F	phosphatase activity	6	363	407	37767	0.2	1	// AT1G70290.1 // AT4G36350.1 // AT2G46880.1 // AT5G66020.1 // AT1G56360.1 // AT2G18130.1
GO:0016817	F	hydrolase activity, acting on acid anhydrides	10	363	839	37767	0.29	1	// AT1G80660.1 // AT3G28510.1 // AT3G08560.1 // AT2G22950.1 // AT5G41550.1 // AT4G25750.1 // AT3G52310.1 // AT2G07560.1 // AT1G54560.1 // AT1G08730.1
GO:0043167	F	ion binding	24	363	2087	37767	0.21	1	// AT1G32250.1 // AT4G30170.1 // AT1G43800.1 // AT1G14200.1 // AT1G26320.1 // AT1G49570.1 // AT4G16260.1 // AT2G01918.1 // AT1G23250.1 // AT3G59450.1 // AT1G02610.1 // AT1G60190.1 // AT1G23240.1 // AT3G21880.1 // AT4G26830.1 // AT4G33070.1 // AT5G22920.1 // AT4G11290.1 // AT5G17480.1 // AT5G19890.1 // AT5G46650.1 // AT3G61035.1 // AT3G03430.1 // AT4G02075.1
GO:0016773	F	phosphotransferase activity, alcohol group as acceptor	10	363	1154	37767	0.67	1	// AT2G16750.1 // AT4G10260.1 // AT3G29040.1 // AT1G21270.1 // AT2G18470.1 // AT2G07040.1 // AT5G45820.1 // AT4G14780.1 // AT3G56600.1 // AT1G65790.1
GO:0005515	F	protein binding	26	363	2944	37767	0.7	1	// AT1G14200.1 // AT3G43120.1 // AT4G16160.1 // AT5G63160.1 // AT1G54560.1 // AT4G21630.1 // AT1G75580.1 // AT1G02610.1 // AT2G42830.1 // AT1G60190.1 // AT3G48360.1 // AT1G08730.1 // AT2G17950.1 // AT2G22950.1 // AT5G41550.1 // AT5G22920.1 // AT4G14550.1 // AT2G26410.1 // AT4G24580.1 // AT2G46440.1 // AT3G09530.1 // AT2G19770.1 // AT4G29340.1 // AT2G21510.1 // AT5G46650.1 // AT4G02075.1
GO:0008233	F	peptidase activity	6	363	646	37767	0.59	1	// AT2G45040.1 // AT4G21630.1 // AT4G22050.1 // AT5G22980.1 // AT2G23010.1 // AT5G45890.1
GO:0003676	F	nucleic acid binding	35	363	4842	37767	0.97	1	// AT4G18960.1 // AT1G26330.1 // AT3G10040.1 // AT3G48840.1 // AT5G17300.1 // AT1G15360.1 // AT5G37260.1 // AT4G17490.1 // AT5G56510.1 // AT4G30180.1 // AT4G21440.1 // AT1G22130.1 // AT3G12430.1 // AT2G13570.1 // AT4G36570.1 // AT2G42830.1 // AT1G22760.1 // AT5G60140.1 // AT5G53980.1 // AT1G71770.1 // AT3G21880.1 // AT4G06746.1 // AT4G39250.1 // AT3G24520.1 // AT2G17950.1 // AT1G35490.1 // AT4G14…
GO:0004871	F	signal transducer activity	7	363	422	37767	0.12	1	// AT1G65790.1 // AT1G28270.1 // AT1G61563.1 // AT5G41550.1 // AT3G25170.1 // AT2G22055.1 // AT1G61566.1
GO:0015291	F	secondary active transmembrane transporter activity	6	363	345	37767	0.12	1	// AT4G28700.1 // AT1G07340.1 // AT1G05580.1 // AT3G05960.1 // AT4G32510.1 // AT3G54700.1
GO:0001883	F	purine nucleoside binding	7	363	1465	37767	0.99	1	// AT2G16750.1 // AT2G07040.1 // AT2G18470.1 // AT1G32300.1 // AT5G41550.1 // AT3G28510.1 // AT5G65690.1
GO:0001882	F	nucleoside binding	7	363	1465	37767	0.99	1	// AT2G16750.1 // AT2G07040.1 // AT2G18470.1 // AT1G32300.1 // AT5G41550.1 // AT3G28510.1 // AT5G65690.1
GO:0016462	F	pyrophosphatase activity	10	363	832	37767	0.28	1	// AT1G80660.1 // AT3G28510.1 // AT3G08560.1 // AT2G22950.1 // AT5G41550.1 // AT4G25750.1 // AT3G52310.1 // AT2G07560.1 // AT1G54560.1 // AT1G08730.1
GO:0030528	F	transcription regulator activity	29	363	2417	37767	0.13	1	// AT4G18960.1 // AT3G10040.1 // AT5G17300.1 // AT1G15360.1 // AT5G37260.1 // AT4G17490.1 // AT4G30180.1 // AT4G21440.1 // AT1G22130.1 // AT2G13570.1 // AT4G36570.1 // AT2G42830.1 // AT5G60140.1 // AT5G53980.1 // AT3G48360.1 // AT3G21880.1 // AT4G06746.1 // AT4G39250.1 // AT3G24520.1 // AT2G17950.1 // AT1G35490.1 // AT4G14550.1 // AT3G21330.1 // AT2G43140.1 // AT4G37260.1 // AT2G21650.1 // AT5G63…
GO:0004674	F	protein serine/threonine kinase activity	7	363	681	37767	0.48	1	// AT2G16750.1 // AT3G29040.1 // AT1G21270.1 // AT2G18470.1 // AT2G07040.1 // AT5G45820.1 // AT1G65790.1
GO:0070011	F	peptidase activity, acting on L-amino acid peptides	6	363	579	37767	0.48	1	// AT2G45040.1 // AT4G21630.1 // AT4G22050.1 // AT5G22980.1 // AT2G23010.1 // AT5G45890.1
GO:0004672	F	protein kinase activity	8	363	953	37767	0.7	1	// AT2G16750.1 // AT3G29040.1 // AT1G21270.1 // AT2G18470.1 // AT2G07040.1 // AT5G45820.1 // AT4G14780.1 // AT1G65790.1
GO:0032559	F	adenyl ribonucleotide binding	6	363	1384	37767	0.99	1	// AT2G16750.1 // AT3G28510.1 // AT2G18470.1 // AT2G07040.1 // AT5G41550.1 // AT5G65690.1
GO:0017111	F	nucleoside-triphosphatase activity	10	363	792	37767	0.24	1	// AT1G80660.1 // AT3G28510.1 // AT3G08560.1 // AT2G22950.1 // AT5G41550.1 // AT4G25750.1 // AT3G52310.1 // AT2G07560.1 // AT1G54560.1 // AT1G08730.1
GO:0046872	F	metal ion binding	22	363	1997	37767	0.29	1	// AT1G32250.1 // AT4G30170.1 // AT1G43800.1 // AT1G14200.1 // AT1G26320.1 // AT1G49570.1 // AT2G01918.1 // AT1G23250.1 // AT3G59450.1 // AT1G02610.1 // AT1G60190.1 // AT1G23240.1 // AT3G21880.1 // AT4G33070.1 // AT5G22920.1 // AT4G11290.1 // AT5G17480.1 // AT5G19890.1 // AT5G46650.1 // AT3G61035.1 // AT3G03430.1 // AT4G02075.1
GO:0003700	F	transcription factor activity	27	363	2173	37767	0.11	1	// AT4G18960.1 // AT3G10040.1 // AT5G17300.1 // AT1G15360.1 // AT5G37260.1 // AT4G17490.1 // AT4G30180.1 // AT4G21440.1 // AT1G22130.1 // AT2G13570.1 // AT4G36570.1 // AT2G42830.1 // AT5G60140.1 // AT5G53980.1 // AT3G21880.1 // AT4G06746.1 // AT4G39250.1 // AT3G24520.1 // AT2G17950.1 // AT1G35490.1 // AT4G14550.1 // AT3G21330.1 // AT2G43140.1 // AT4G37260.1 // AT2G21650.1 // AT4G05100.1 // AT2G46…
GO:0046914	F	transition metal ion binding	14	363	1618	37767	0.69	1	// AT5G22920.1 // AT4G30170.1 // AT1G43800.1 // AT1G14200.1 // AT1G26320.1 // AT5G46650.1 // AT3G21880.1 // AT1G49570.1 // AT1G60190.1 // AT3G61035.1 // AT4G11290.1 // AT5G19890.1 // AT1G02610.1 // AT4G02075.1
Cellular process
GO:0012505	C	endomembrane system	71	363	3416	37767	7e-10	9.4e-08	// AT4G21400.1 // AT5G45880.1 // AT1G32300.1 // AT2G16505.1 // AT1G76470.1 // AT1G29140.1 // AT1G30795.1 // AT1G66850.1 // AT1G49570.1 // AT1G62510.1 // AT1G13830.1 // AT3G22050.1 // AT3G28780.1 // AT4G30170.1 // AT5G48140.1 // AT4G38700.1 // AT3G13130.1 // AT3G28750.1 // AT2G16750.1 // AT4G33355.1 // AT3G29040.1 // AT3G23510.1 // AT5G61605.1 // AT3G21960.1 // AT5G61720.1 // AT4G22050.1 // AT2G47…
GO:0005576	C	extracellular region	15	363	285	37767	2.4e-07	1.6e-05	// AT1G23240.1 // AT5G45880.1 // AT1G28270.1 // AT5G14380.1 // AT1G75930.1 // AT2G14610.1 // AT2G43530.1 // AT5G07550.1 // AT5G07510.1 // AT5G07520.1 // AT3G25170.1 // AT1G61563.1 // AT5G07530.1 // AT2G22055.1 // AT1G61566.1
GO:0009505	C	plant-type cell wall	10	363	254	37767	0.00024	0.011	// AT4G21630.1 // AT5G49180.1 // AT3G62170.1 // AT1G35140.1 // AT2G26450.1 // AT4G08950.1 // AT5G07410.1 // AT5G22200.1 // AT2G47030.1 // AT3G05610.1
GO:0030312	C	external encapsulating structure	12	363	407	37767	0.00077	0.015	// AT4G21630.1 // AT5G49180.1 // AT3G62170.1 // AT1G35140.1 // AT2G26450.1 // AT4G08950.1 // AT5G07410.1 // AT5G57560.1 // AT5G22200.1 // AT2G47030.1 // AT4G16260.1 // AT3G05610.1
GO:0044464	C	cell part	177	363	15217	37767	0.0007	0.015	// AT4G30170.1 // AT5G61720.1 // AT1G29140.1 // AT3G55240.1 // AT5G45880.1 // AT3G01230.1 // AT4G10603.1 // AT4G38700.1 // AT1G69260.1 // AT3G62230.1 // AT1G08730.1 // AT1G07340.1 // AT4G22050.1 // AT1G35140.1 // AT3G20520.1 // AT5G59370.1 // AT5G19580.1 // AT1G52070.1 // AT5G11610.1 // AT4G06746.1 // AT1G80660.1 // AT4G26590.1 // AT1G11765.1 // AT1G47980.1 // AT1G02813.1 // AT3G01270.1 // AT3G22…
GO:0005623	C	cell	177	363	15217	37767	0.0007	0.015	// AT4G30170.1 // AT5G61720.1 // AT1G29140.1 // AT3G55240.1 // AT5G45880.1 // AT3G01230.1 // AT4G10603.1 // AT4G38700.1 // AT1G69260.1 // AT3G62230.1 // AT1G08730.1 // AT1G07340.1 // AT4G22050.1 // AT1G35140.1 // AT3G20520.1 // AT5G59370.1 // AT5G19580.1 // AT1G52070.1 // AT5G11610.1 // AT4G06746.1 // AT1G80660.1 // AT4G26590.1 // AT1G11765.1 // AT1G47980.1 // AT1G02813.1 // AT3G01270.1 // AT3G22…
GO:0005618	C	cell wall	12	363	403	37767	0.0007	0.015	// AT4G21630.1 // AT5G49180.1 // AT3G62170.1 // AT1G35140.1 // AT2G26450.1 // AT4G08950.1 // AT5G07410.1 // AT5G57560.1 // AT5G22200.1 // AT2G47030.1 // AT4G16260.1 // AT3G05610.1
GO:0031225	C	anchored to membrane	9	363	272	37767	0.0016	0.027	// AT2G45040.1 // AT1G54860.1 // AT5G14380.1 // AT3G20520.1 // AT4G08670.1 // AT1G18280.1 // AT3G01700.1 // AT3G26110.1 // AT4G31370.1
GO:0031224	C	intrinsic to membrane	15	363	806	37767	0.013	0.19	// AT2G45040.1 // AT1G54860.1 // AT4G32510.1 // AT5G14380.1 // AT4G27970.1 // AT5G41550.1 // AT3G20520.1 // AT4G08670.1 // AT1G18280.1 // AT4G28088.1 // AT3G01700.1 // AT3G26110.1 // AT4G10850.1 // AT1G07340.1 // AT4G31370.1
GO:0016020	C	membrane	53	363	4068	37767	0.015	0.2	// AT1G54860.1 // AT1G71680.1 // AT1G43800.1 // AT4G28700.1 // AT4G27970.1 // AT3G06435.1 // AT2G02020.1 // AT4G16160.1 // AT5G07510.1 // AT4G16260.1 // AT5G37810.1 // AT2G01918.1 // AT3G19680.1 // AT1G79780.1 // AT1G07340.1 // AT1G32300.1 // AT4G25750.1 // AT3G20520.1 // AT5G07520.1 // AT4G10850.1 // AT4G32510.1 // AT3G26110.1 // AT3G54700.1 // AT5G11610.1 // AT2G45040.1 // AT1G80660.1 // AT4G26…
GO:0048046	C	apoplast	5	363	182	37767	0.034	0.42	// AT2G22055.1 // AT1G28270.1 // AT1G61566.1 // AT3G25170.1 // AT1G61563.1
GO:0044425	C	membrane part	19	363	1360	37767	0.07	0.79	// AT2G01918.1 // AT2G45040.1 // AT1G54860.1 // AT1G07340.1 // AT3G08560.1 // AT4G27970.1 // AT5G41550.1 // AT3G20520.1 // AT4G08670.1 // AT4G16160.1 // AT1G18280.1 // AT5G14380.1 // AT2G13680.1 // AT4G28088.1 // AT3G01700.1 // AT4G32510.1 // AT4G10850.1 // AT3G26110.1 // AT4G31370.1
GO:0016021	C	integral to membrane	5	363	395	37767	0.33	1	// AT4G10850.1 // AT4G27970.1 // AT4G32510.1 // AT4G28088.1 // AT1G07340.1
GO:0009507	C	chloroplast	10	363	2740	37767	1	1	// AT5G39650.1 // AT1G07985.1 // AT4G31870.1 // AT4G19430.1 // AT5G02020.1 // AT2G18470.1 // AT2G11810.1 // AT3G25480.1 // AT1G23640.1 // AT2G39800.1
GO:0044422	C	organelle part	8	363	2562	37767	1	1	// AT5G09500.1 // AT3G08560.1 // AT2G11810.1 // AT4G16160.1 // AT2G01918.1 // AT3G25480.1 // AT1G54560.1 // AT1G08730.1
GO:0043234	C	protein complex	8	363	1443	37767	0.97	1	// AT3G08560.1 // AT4G16160.1 // AT3G09530.1 // AT2G13680.1 // AT1G60190.1 // AT2G01918.1 // AT1G08730.1 // AT1G54560.1
GO:0043231	C	intracellular membrane-bounded organelle	36	363	7615	37767	1	1	// AT5G39650.1 // AT3G15280.1 // AT1G69260.1 // AT1G26330.1 // AT1G15360.1 // AT4G16160.1 // AT2G23800.1 // AT4G17490.1 // AT2G39800.1 // AT3G25480.1 // AT5G59370.1 // AT2G18470.1 // AT5G63160.1 // AT2G42830.1 // AT5G53980.1 // AT3G48360.1 // AT1G71770.1 // AT4G06746.1 // AT4G31870.1 // AT4G19430.1 // AT3G08560.1 // AT4G14550.1 // AT3G21330.1 // AT4G24580.1 // AT5G45890.1 // AT2G43140.1 // AT5G19…
GO:0005829	C	cytosol	7	363	912	37767	0.77	1	// AT5G09500.1 // AT5G45820.1 // AT4G04840.1 // AT1G77120.1 // AT3G03540.1 // AT1G04580.1 // AT1G71770.1
GO:0044424	C	intracellular part	50	363	9302	37767	1	1	// AT5G39650.1 // AT3G15280.1 // AT1G69260.1 // AT1G26330.1 // AT2G01918.1 // AT1G15360.1 // AT4G16160.1 // AT2G23800.1 // AT1G62450.1 // AT4G17490.1 // AT1G54560.1 // AT5G17480.1 // AT2G39800.1 // AT3G25480.1 // AT1G08730.1 // AT5G09500.1 // AT2G42830.1 // AT1G70560.1 // AT2G18470.1 // AT5G45820.1 // AT5G63160.1 // AT5G59370.1 // AT1G60190.1 // AT3G03540.1 // AT1G77120.1 // AT3G48360.1 // AT1G71…
GO:0043232	C	intracellular non-membrane-bounded organelle	5	363	1040	37767	0.97	1	// AT2G19770.1 // AT5G09500.1 // AT1G54560.1 // AT4G29340.1 // AT1G08730.1
GO:0043229	C	intracellular organelle	40	363	8149	37767	1	1	// AT5G39650.1 // AT3G15280.1 // AT1G69260.1 // AT1G26330.1 // AT1G15360.1 // AT4G16160.1 // AT2G23800.1 // AT4G17490.1 // AT1G54560.1 // AT2G01918.1 // AT2G39800.1 // AT3G25480.1 // AT1G08730.1 // AT5G09500.1 // AT5G59370.1 // AT2G18470.1 // AT5G63160.1 // AT2G42830.1 // AT5G53980.1 // AT3G48360.1 // AT1G71770.1 // AT4G06746.1 // AT4G31870.1 // AT4G19430.1 // AT3G08560.1 // AT4G14550.1 // AT3G21…
GO:0043227	C	membrane-bounded organelle	36	363	7622	37767	1	1	// AT5G39650.1 // AT3G15280.1 // AT1G69260.1 // AT1G26330.1 // AT1G15360.1 // AT4G16160.1 // AT2G23800.1 // AT4G17490.1 // AT2G39800.1 // AT3G25480.1 // AT5G59370.1 // AT2G18470.1 // AT5G63160.1 // AT2G42830.1 // AT5G53980.1 // AT3G48360.1 // AT1G71770.1 // AT4G06746.1 // AT4G31870.1 // AT4G19430.1 // AT3G08560.1 // AT4G14550.1 // AT3G21330.1 // AT4G24580.1 // AT5G45890.1 // AT2G43140.1 // AT5G19…
GO:0044444	C	cytoplasmic part	28	363	6289	37767	1	1	// AT5G39650.1 // AT3G15280.1 // AT4G16160.1 // AT2G23800.1 // AT2G39800.1 // AT5G09500.1 // AT2G18470.1 // AT5G45820.1 // AT5G59370.1 // AT3G03540.1 // AT1G77120.1 // AT3G01020.1 // AT1G71770.1 // AT4G31870.1 // AT4G19430.1 // AT3G08560.1 // AT4G24580.1 // AT1G04580.1 // AT5G45890.1 // AT3G25480.1 // AT1G07985.1 // AT3G09530.1 // AT5G02020.1 // AT2G19770.1 // AT2G11810.1 // AT4G04840.1 // AT1G63…
GO:0005739	C	mitochondrion	6	363	1276	37767	0.98	1	// AT4G16160.1 // AT3G15280.1 // AT3G08560.1 // AT1G63060.1 // AT5G59370.1 // AT3G01020.1
GO:0032991	C	macromolecular complex	9	363	2180	37767	1	1	// AT5G09500.1 // AT3G08560.1 // AT4G16160.1 // AT3G09530.1 // AT2G13680.1 // AT1G60190.1 // AT2G01918.1 // AT1G08730.1 // AT1G54560.1
GO:0005622	C	intracellular	54	363	9671	37767	1	1	// AT5G39650.1 // AT3G15280.1 // AT1G69260.1 // AT1G26330.1 // AT3G12430.1 // AT2G01918.1 // AT1G15360.1 // AT4G16160.1 // AT2G23800.1 // AT1G62450.1 // AT4G17490.1 // AT1G54560.1 // AT5G17480.1 // AT2G39800.1 // AT3G25480.1 // AT1G08730.1 // AT5G09500.1 // AT2G42830.1 // AT1G70560.1 // AT2G18470.1 // AT5G45820.1 // AT5G63160.1 // AT5G59370.1 // AT1G60190.1 // AT3G03540.1 // AT1G77120.1 // AT3G48…
GO:0043228	C	non-membrane-bounded organelle	5	363	1040	37767	0.97	1	// AT2G19770.1 // AT5G09500.1 // AT1G54560.1 // AT4G29340.1 // AT1G08730.1
GO:0005634	C	nucleus	17	363	2621	37767	0.97	1	// AT1G69260.1 // AT1G26330.1 // AT5G63160.1 // AT1G65790.1 // AT2G19770.1 // AT1G15360.1 // AT4G14550.1 // AT3G21330.1 // AT2G42830.1 // AT4G17490.1 // AT4G29340.1 // AT5G53980.1 // AT3G48360.1 // AT1G71770.1 // AT5G19890.1 // AT2G43140.1 // AT4G06746.1
GO:0009536	C	plastid	11	363	2965	37767	1	1	// AT5G39650.1 // AT1G07985.1 // AT4G31870.1 // AT4G19430.1 // AT5G02020.1 // AT2G18470.1 // AT2G11810.1 // AT4G16160.1 // AT3G25480.1 // AT1G23640.1 // AT2G39800.1
GO:0044446	C	intracellular organelle part	8	363	2561	37767	1	1	// AT5G09500.1 // AT3G08560.1 // AT2G11810.1 // AT4G16160.1 // AT2G01918.1 // AT3G25480.1 // AT1G54560.1 // AT1G08730.1
GO:0005886	C	plasma membrane	12	363	1456	37767	0.74	1	// AT3G19680.1 // AT4G28700.1 // AT2G07040.1 // AT4G27970.1 // AT3G54700.1 // AT4G16260.1 // AT2G13680.1 // AT3G52310.1 // AT1G07340.1 // AT1G60740.1 // AT1G21270.1 // AT1G80660.1
GO:0005737	C	cytoplasm	35	363	6822	37767	1	1	// AT5G39650.1 // AT3G15280.1 // AT4G16160.1 // AT2G23800.1 // AT1G62450.1 // AT5G17480.1 // AT2G39800.1 // AT5G63160.1 // AT5G09500.1 // AT1G70560.1 // AT2G18470.1 // AT5G45820.1 // AT5G59370.1 // AT3G03540.1 // AT1G77120.1 // AT3G48360.1 // AT1G71770.1 // AT4G31870.1 // AT4G19430.1 // AT3G08560.1 // AT4G24580.1 // AT1G04580.1 // AT5G45890.1 // AT3G25480.1 // AT5G19890.1 // AT3G01020.1 // AT1G07…
GO:0043226	C	organelle	40	363	8155	37767	1	1	// AT5G39650.1 // AT3G15280.1 // AT1G69260.1 // AT1G26330.1 // AT1G15360.1 // AT4G16160.1 // AT2G23800.1 // AT4G17490.1 // AT1G54560.1 // AT2G01918.1 // AT2G39800.1 // AT3G25480.1 // AT1G08730.1 // AT5G09500.1 // AT5G59370.1 // AT2G18470.1 // AT5G63160.1 // AT2G42830.1 // AT5G53980.1 // AT3G48360.1 // AT1G71770.1 // AT4G06746.1 // AT4G31870.1 // AT4G19430.1 // AT3G08560.1 // AT4G14550.1 // AT3G21…

## Sheet: GO_T3
Gene Ontology Enrichment and list of genes involved in REVIGO Interactive Graph of OsGSTU30 trangenic line(T3).
GO ID	term_type	Gene Ontology Term	queryitem	querytotal	bgitem	bgtotal	pvalue	FDR	TAIR Gene ID
Biological process
GO:0010876	P	lipid localization	15	244	24	37767	1.8e-23	1e-20	// AT1G66850.1 // AT4G33355.1 // AT5G07530.1 // AT3G22142.1 // AT4G12470.1 // AT5G07550.1 // AT1G62510.1 // AT5G07510.1 // AT5G07520.1 // AT4G15160.1 // AT5G07560.1 // AT4G08670.1 // AT5G07230.1 // AT1G18280.1 // AT4G12500.1
GO:0006869	P	lipid transport	10	244	163	37767	2e-07	5.7e-05	// AT1G66850.1 // AT4G33355.1 // AT3G22142.1 // AT1G18280.1 // AT1G62510.1 // AT4G12470.1 // AT4G15160.1 // AT4G08670.1 // AT5G07230.1 // AT4G12500.1
GO:0042221	P	response to chemical stimulus	35	244	2085	37767	3e-07	5.7e-05	// AT4G30170.1 // AT1G69260.1 // AT3G12830.1 // AT5G45820.1 // AT1G15360.1 // AT5G37260.1 // AT4G17490.1 // AT1G73120.1 // AT5G20820.1 // AT2G39800.1 // AT4G21440.1 // AT5G26220.1 // AT1G21270.1 // AT1G75580.1 // AT1G76930.1 // AT4G05100.1 // AT5G66400.1 // AT1G70560.1 // AT1G77120.1 // AT3G48360.1 // AT3G16670.1 // AT3G47340.1 // AT2G14610.1 // AT4G14550.1 // AT5G15960.1 // AT5G47000.1 // AT1G49…
GO:0033036	P	macromolecule localization	15	244	462	37767	5.6e-07	8e-05	// AT1G66850.1 // AT4G33355.1 // AT5G07530.1 // AT3G22142.1 // AT4G12470.1 // AT5G07550.1 // AT1G62510.1 // AT5G07510.1 // AT5G07520.1 // AT4G15160.1 // AT5G07560.1 // AT4G08670.1 // AT5G07230.1 // AT1G18280.1 // AT4G12500.1
GO:0019915	P	lipid storage	5	244	24	37767	1.1e-06	0.00012	// AT5G07510.1 // AT5G07520.1 // AT5G07530.1 // AT5G07550.1 // AT5G07560.1
GO:0019953	P	sexual reproduction	7	244	80	37767	1.6e-06	0.00015	// AT5G07530.1 // AT1G75930.1 // AT5G07550.1 // AT5G07560.1 // AT5G07510.1 // AT5G07520.1 // AT4G13560.1
GO:0009725	P	response to hormone stimulus	21	244	982	37767	2.5e-06	0.0002	// AT2G39800.1 // AT1G69260.1 // AT3G12830.1 // AT1G75580.1 // AT1G76930.1 // AT5G63160.1 // AT5G45820.1 // AT4G05100.1 // AT4G08950.1 // AT4G14550.1 // AT5G15960.1 // AT1G70560.1 // AT5G57560.1 // AT4G17490.1 // AT4G21440.1 // AT1G15360.1 // AT5G20820.1 // AT3G48360.1 // AT5G37260.1 // AT5G66400.1 // AT4G37260.1
GO:0050896	P	response to stimulus	50	244	4057	37767	6.6e-06	0.00047	// AT3G47340.1 // AT4G30170.1 // AT1G69260.1 // AT3G12830.1 // AT1G76930.1 // AT1G53540.1 // AT1G15360.1 // AT5G37260.1 // AT4G16260.1 // AT1G73120.1 // AT4G38700.1 // AT5G20820.1 // AT2G39800.1 // AT2G43530.1 // AT5G66400.1 // AT4G14690.1 // AT5G26220.1 // AT1G21270.1 // AT1G75580.1 // AT5G45820.1 // AT4G05100.1 // AT4G21440.1 // AT1G70560.1 // AT3G25050.1 // AT1G77120.1 // AT3G48360.1 // AT3G16…
GO:0009719	P	response to endogenous stimulus	21	244	1068	37767	8.7e-06	0.00055	// AT2G39800.1 // AT1G69260.1 // AT3G12830.1 // AT1G75580.1 // AT1G76930.1 // AT5G63160.1 // AT5G45820.1 // AT4G05100.1 // AT4G08950.1 // AT4G14550.1 // AT5G15960.1 // AT1G70560.1 // AT5G57560.1 // AT4G17490.1 // AT4G21440.1 // AT1G15360.1 // AT5G20820.1 // AT3G48360.1 // AT5G37260.1 // AT5G66400.1 // AT4G37260.1
GO:0010033	P	response to organic substance	23	244	1342	37767	2.7e-05	0.0016	// AT5G66400.1 // AT1G69260.1 // AT3G12830.1 // AT5G45820.1 // AT1G15360.1 // AT5G37260.1 // AT4G17490.1 // AT5G20820.1 // AT2G39800.1 // AT5G63160.1 // AT1G21270.1 // AT1G75580.1 // AT1G76930.1 // AT4G05100.1 // AT4G21440.1 // AT1G70560.1 // AT3G48360.1 // AT3G47340.1 // AT4G14550.1 // AT5G15960.1 // AT4G37260.1 // AT4G08950.1 // AT5G57560.1
GO:0006950	P	response to stress	32	244	2320	37767	5.1e-05	0.0026	// AT4G30170.1 // AT1G53540.1 // AT1G15360.1 // AT5G37260.1 // AT4G16260.1 // AT1G73120.1 // AT4G38700.1 // AT2G39800.1 // AT2G43530.1 // AT4G21440.1 // AT1G76930.1 // AT4G05100.1 // AT5G66400.1 // AT3G47340.1 // AT1G77120.1 // AT3G48360.1 // AT3G16670.1 // AT3G09922.1 // AT2G14610.1 // AT5G41550.1 // AT4G10270.1 // AT5G15960.1 // AT4G12470.1 // AT5G47000.1 // AT1G49570.1 // AT4G11290.1 // AT5G19…
GO:0051179	P	localization	27	244	1922	37767	0.00015	0.0072	// AT1G66850.1 // AT4G28700.1 // AT2G02020.1 // AT1G62510.1 // AT5G07510.1 // AT3G52310.1 // AT1G08730.1 // AT4G33355.1 // AT1G07340.1 // AT4G25750.1 // AT5G07520.1 // AT4G32510.1 // AT1G54560.1 // AT3G54700.1 // AT1G80660.1 // AT4G26590.1 // AT5G07550.1 // AT4G08670.1 // AT4G12470.1 // AT4G15160.1 // AT5G07560.1 // AT5G07230.1 // AT5G07530.1 // AT4G35180.1 // AT3G22142.1 // AT1G18280.1 // AT4G12…
GO:0009737	P	response to abscisic acid stimulus	10	244	378	37767	0.00023	0.0099	// AT1G69260.1 // AT5G45820.1 // AT1G76930.1 // AT4G21440.1 // AT5G15960.1 // AT4G05100.1 // AT2G39800.1 // AT5G37260.1 // AT5G66400.1 // AT4G37260.1
GO:0009555	P	pollen development	6	244	148	37767	0.0005	0.02	// AT1G01280.1 // AT1G07340.1 // AT3G11980.1 // AT2G13680.1 // AT3G48360.1 // AT5G63160.1
GO:0009733	P	response to auxin stimulus	9	244	360	37767	0.00069	0.026	// AT3G12830.1 // AT1G75580.1 // AT4G14550.1 // AT5G57560.1 // AT5G20820.1 // AT3G48360.1 // AT5G37260.1 // AT5G63160.1 // AT4G37260.1
GO:0000003	P	reproduction	18	244	1186	37767	0.00085	0.03	// AT2G21650.1 // AT5G07530.1 // AT4G18960.1 // AT5G14380.1 // AT1G75930.1 // AT5G07550.1 // AT5G49360.1 // AT2G42830.1 // AT5G07510.1 // AT5G07520.1 // AT5G37260.1 // AT5G07560.1 // AT3G25050.1 // AT4G24972.1 // AT4G13560.1 // AT1G65790.1 // AT1G70560.1 // AT4G24580.1
GO:0006979	P	response to oxidative stress	8	244	332	37767	0.0017	0.057	// AT4G30170.1 // AT1G49570.1 // AT5G47000.1 // AT4G11290.1 // AT1G73120.1 // AT2G39800.1 // AT5G19890.1 // AT3G16670.1
GO:0048869	P	cellular developmental process	10	244	520	37767	0.0024	0.062	// AT1G01280.1 // AT4G18960.1 // AT5G14380.1 // AT2G17950.1 // AT1G20190.1 // AT1G21270.1 // AT3G11980.1 // AT1G70560.1 // AT2G13680.1 // AT4G24972.1
GO:0009605	P	response to external stimulus	9	244	429	37767	0.0022	0.062	// AT3G09922.1 // AT2G14610.1 // AT2G11810.1 // AT1G76930.1 // AT4G10270.1 // AT1G70560.1 // AT5G57560.1 // AT3G47340.1 // AT4G21440.1
GO:0006810	P	transport	23	244	1846	37767	0.0023	0.062	// AT1G66850.1 // AT4G28700.1 // AT2G02020.1 // AT1G62510.1 // AT3G52310.1 // AT1G54560.1 // AT4G33355.1 // AT1G07340.1 // AT4G25750.1 // AT4G32510.1 // AT1G08730.1 // AT3G54700.1 // AT1G80660.1 // AT4G26590.1 // AT4G08670.1 // AT4G12470.1 // AT4G15160.1 // AT5G07230.1 // AT5G07530.1 // AT4G35180.1 // AT3G22142.1 // AT1G18280.1 // AT4G12500.1
GO:0051234	P	establishment of localization	23	244	1851	37767	0.0023	0.062	// AT1G66850.1 // AT4G28700.1 // AT2G02020.1 // AT1G62510.1 // AT3G52310.1 // AT1G54560.1 // AT4G33355.1 // AT1G07340.1 // AT4G25750.1 // AT4G32510.1 // AT1G08730.1 // AT3G54700.1 // AT1G80660.1 // AT4G26590.1 // AT4G08670.1 // AT4G12470.1 // AT4G15160.1 // AT5G07230.1 // AT5G07530.1 // AT4G35180.1 // AT3G22142.1 // AT1G18280.1 // AT4G12500.1
GO:0009723	P	response to ethylene stimulus	6	244	199	37767	0.0022	0.062	// AT1G15360.1 // AT5G37260.1 // AT1G70560.1 // AT4G05100.1 // AT4G17490.1 // AT4G37260.1
GO:0008610	P	lipid biosynthetic process	9	244	439	37767	0.0026	0.064	// AT1G76470.1 // AT3G21500.1 // AT1G43800.1 // AT3G23510.1 // AT2G11810.1 // AT1G15360.1 // AT1G04580.1 // AT2G23800.1 // AT3G25820.1
GO:0009628	P	response to abiotic stimulus	19	244	1471	37767	0.0037	0.088	// AT4G14690.1 // AT3G02480.1 // AT1G70560.1 // AT3G25050.1 // AT1G53540.1 // AT4G05100.1 // AT1G15360.1 // AT4G21440.1 // AT5G15960.1 // AT5G53980.1 // AT5G57560.1 // AT4G16260.1 // AT3G47340.1 // AT1G77120.1 // AT2G39800.1 // AT5G37260.1 // AT2G46970.1 // AT5G66400.1 // AT4G37260.1
GO:0048229	P	gametophyte development	6	244	233	37767	0.0046	0.11	// AT1G01280.1 // AT1G07340.1 // AT3G11980.1 // AT2G13680.1 // AT3G48360.1 // AT5G63160.1
GO:0006970	P	response to osmotic stress	8	244	408	37767	0.0057	0.13	// AT5G37260.1 // AT5G15960.1 // AT4G05100.1 // AT4G16260.1 // AT1G77120.1 // AT2G39800.1 // AT4G21440.1 // AT4G37260.1
GO:0043436	P	oxoacid metabolic process	12	244	859	37767	0.011	0.22	// AT5G25880.1 // AT1G43800.1 // AT1G70560.1 // AT4G08040.1 // AT3G47340.1 // AT2G11810.1 // AT1G15360.1 // AT5G65690.1 // AT4G26260.1 // AT1G04580.1 // AT1G01280.1 // AT2G39800.1
GO:0006082	P	organic acid metabolic process	12	244	860	37767	0.011	0.22	// AT5G25880.1 // AT1G43800.1 // AT1G70560.1 // AT4G08040.1 // AT3G47340.1 // AT2G11810.1 // AT1G15360.1 // AT5G65690.1 // AT4G26260.1 // AT1G04580.1 // AT1G01280.1 // AT2G39800.1
GO:0019752	P	carboxylic acid metabolic process	12	244	859	37767	0.011	0.22	// AT5G25880.1 // AT1G43800.1 // AT1G70560.1 // AT4G08040.1 // AT3G47340.1 // AT2G11810.1 // AT1G15360.1 // AT5G65690.1 // AT4G26260.1 // AT1G04580.1 // AT1G01280.1 // AT2G39800.1
GO:0032989	P	cellular component morphogenesis	6	244	289	37767	0.012	0.23	// AT1G01280.1 // AT1G21270.1 // AT1G20190.1 // AT5G14380.1 // AT3G11980.1 // AT2G13680.1
GO:0042180	P	cellular ketone metabolic process	12	244	882	37767	0.013	0.25	// AT5G25880.1 // AT1G43800.1 // AT1G70560.1 // AT4G08040.1 // AT3G47340.1 // AT2G11810.1 // AT1G15360.1 // AT5G65690.1 // AT4G26260.1 // AT1G04580.1 // AT1G01280.1 // AT2G39800.1
GO:0032502	P	developmental process	24	244	2304	37767	0.015	0.27	// AT4G18960.1 // AT3G55240.1 // AT5G37260.1 // AT2G42830.1 // AT2G39800.1 // AT4G13560.1 // AT5G63160.1 // AT1G07340.1 // AT1G20190.1 // AT3G11980.1 // AT1G70560.1 // AT2G41260.1 // AT3G48360.1 // AT1G01280.1 // AT2G17950.1 // AT3G25050.1 // AT5G49360.1 // AT4G24580.1 // AT4G14550.1 // AT2G21650.1 // AT5G14380.1 // AT1G21270.1 // AT2G13680.1 // AT4G24972.1
GO:0032787	P	monocarboxylic acid metabolic process	7	244	408	37767	0.018	0.29	// AT1G43800.1 // AT1G70560.1 // AT2G11810.1 // AT1G15360.1 // AT5G65690.1 // AT1G04580.1 // AT1G01280.1
GO:0009791	P	post-embryonic development	10	244	705	37767	0.018	0.29	// AT5G49360.1 // AT2G21650.1 // AT4G18960.1 // AT1G70560.1 // AT3G25050.1 // AT4G14550.1 // AT2G42830.1 // AT5G37260.1 // AT4G24972.1 // AT4G13560.1
GO:0009414	P	response to water deprivation	5	244	229	37767	0.018	0.29	// AT5G15960.1 // AT2G39800.1 // AT5G66400.1 // AT1G15360.1 // AT3G02480.1
GO:0048856	P	anatomical structure development	19	244	1726	37767	0.018	0.29	// AT5G49360.1 // AT2G21650.1 // AT5G37260.1 // AT1G01280.1 // AT4G18960.1 // AT5G14380.1 // AT2G17950.1 // AT1G20190.1 // AT1G21270.1 // AT4G14550.1 // AT3G11980.1 // AT2G42830.1 // AT4G24580.1 // AT2G13680.1 // AT3G25050.1 // AT4G24972.1 // AT2G39800.1 // AT4G13560.1 // AT1G70560.1
GO:0009889	P	regulation of biosynthetic process	20	244	1881	37767	0.021	0.31	// AT5G17300.1 // AT4G14690.1 // AT4G30180.1 // AT3G10040.1 // AT2G21650.1 // AT1G15360.1 // AT4G36570.1 // AT3G21330.1 // AT2G42830.1 // AT4G05100.1 // AT4G17490.1 // AT4G21440.1 // AT5G60140.1 // AT5G53980.1 // AT2G43140.1 // AT5G37260.1 // AT2G46970.1 // AT1G33760.1 // AT4G37260.1 // AT4G06746.1
GO:0009415	P	response to water	5	244	240	37767	0.021	0.31	// AT5G15960.1 // AT2G39800.1 // AT5G66400.1 // AT1G15360.1 // AT3G02480.1
GO:0031326	P	regulation of cellular biosynthetic process	20	244	1881	37767	0.021	0.31	// AT5G17300.1 // AT4G14690.1 // AT4G30180.1 // AT3G10040.1 // AT2G21650.1 // AT1G15360.1 // AT4G36570.1 // AT3G21330.1 // AT2G42830.1 // AT4G05100.1 // AT4G17490.1 // AT4G21440.1 // AT5G60140.1 // AT5G53980.1 // AT2G43140.1 // AT5G37260.1 // AT2G46970.1 // AT1G33760.1 // AT4G37260.1 // AT4G06746.1
GO:0051171	P	regulation of nitrogen compound metabolic process	20	244	1888	37767	0.022	0.31	// AT5G17300.1 // AT4G14690.1 // AT4G30180.1 // AT3G10040.1 // AT2G21650.1 // AT1G15360.1 // AT4G36570.1 // AT3G21330.1 // AT2G42830.1 // AT4G05100.1 // AT4G17490.1 // AT4G21440.1 // AT5G60140.1 // AT5G53980.1 // AT2G43140.1 // AT5G37260.1 // AT2G46970.1 // AT1G33760.1 // AT4G37260.1 // AT4G06746.1
GO:0007275	P	multicellular organismal development	21	244	2020	37767	0.023	0.32	// AT5G49360.1 // AT2G21650.1 // AT5G37260.1 // AT5G63160.1 // AT4G18960.1 // AT1G07340.1 // AT2G17950.1 // AT3G25050.1 // AT5G14380.1 // AT1G70560.1 // AT4G14550.1 // AT3G11980.1 // AT2G42830.1 // AT4G24580.1 // AT2G13680.1 // AT2G41260.1 // AT4G24972.1 // AT1G01280.1 // AT3G48360.1 // AT4G13560.1 // AT2G39800.1
GO:0045449	P	regulation of transcription	19	244	1802	37767	0.026	0.36	// AT5G17300.1 // AT4G30180.1 // AT3G10040.1 // AT2G21650.1 // AT1G15360.1 // AT4G36570.1 // AT3G21330.1 // AT2G42830.1 // AT4G05100.1 // AT4G17490.1 // AT4G21440.1 // AT5G60140.1 // AT5G53980.1 // AT2G43140.1 // AT5G37260.1 // AT2G46970.1 // AT1G33760.1 // AT4G37260.1 // AT4G06746.1
GO:0010556	P	regulation of macromolecule biosynthetic process	19	244	1843	37767	0.032	0.41	// AT5G17300.1 // AT4G30180.1 // AT3G10040.1 // AT2G21650.1 // AT1G15360.1 // AT4G36570.1 // AT3G21330.1 // AT2G42830.1 // AT4G05100.1 // AT4G17490.1 // AT4G21440.1 // AT5G60140.1 // AT5G53980.1 // AT2G43140.1 // AT5G37260.1 // AT2G46970.1 // AT1G33760.1 // AT4G37260.1 // AT4G06746.1
GO:0032501	P	multicellular organismal process	21	244	2094	37767	0.032	0.41	// AT5G49360.1 // AT2G21650.1 // AT5G37260.1 // AT5G63160.1 // AT4G18960.1 // AT1G07340.1 // AT2G17950.1 // AT3G25050.1 // AT5G14380.1 // AT1G70560.1 // AT4G14550.1 // AT3G11980.1 // AT2G42830.1 // AT4G24580.1 // AT2G13680.1 // AT2G41260.1 // AT4G24972.1 // AT1G01280.1 // AT3G48360.1 // AT4G13560.1 // AT2G39800.1
GO:0019219	P	regulation of nucleobase, nucleoside, nucleotide and nucleic acid metabolic process	19	244	1847	37767	0.033	0.41	// AT5G17300.1 // AT4G30180.1 // AT3G10040.1 // AT2G21650.1 // AT1G15360.1 // AT4G36570.1 // AT3G21330.1 // AT2G42830.1 // AT4G05100.1 // AT4G17490.1 // AT4G21440.1 // AT5G60140.1 // AT5G53980.1 // AT2G43140.1 // AT5G37260.1 // AT2G46970.1 // AT1G33760.1 // AT4G37260.1 // AT4G06746.1
GO:0009651	P	response to salt stress	6	244	366	37767	0.034	0.42	// AT5G37260.1 // AT4G05100.1 // AT4G16260.1 // AT2G39800.1 // AT4G21440.1 // AT4G37260.1
GO:0022414	P	reproductive process	13	244	1161	37767	0.041	0.49	// AT2G21650.1 // AT5G07530.1 // AT4G18960.1 // AT5G14380.1 // AT3G25050.1 // AT5G49360.1 // AT2G42830.1 // AT4G24580.1 // AT5G37260.1 // AT4G24972.1 // AT4G13560.1 // AT1G65790.1 // AT1G70560.1
GO:0031323	P	regulation of cellular metabolic process	20	244	2036	37767	0.043	0.51	// AT5G17300.1 // AT4G14690.1 // AT4G30180.1 // AT3G10040.1 // AT2G21650.1 // AT1G15360.1 // AT4G36570.1 // AT3G21330.1 // AT2G42830.1 // AT4G05100.1 // AT4G17490.1 // AT4G21440.1 // AT5G60140.1 // AT5G53980.1 // AT2G43140.1 // AT5G37260.1 // AT2G46970.1 // AT1G33760.1 // AT4G37260.1 // AT4G06746.1
GO:0006350	P	transcription	19	244	1923	37767	0.046	0.53	// AT5G17300.1 // AT4G30180.1 // AT3G10040.1 // AT2G21650.1 // AT1G15360.1 // AT4G36570.1 // AT3G21330.1 // AT2G42830.1 // AT4G05100.1 // AT4G17490.1 // AT4G21440.1 // AT5G60140.1 // AT5G53980.1 // AT2G43140.1 // AT5G37260.1 // AT2G46970.1 // AT1G33760.1 // AT4G37260.1 // AT4G06746.1
GO:0006629	P	lipid metabolic process	10	244	841	37767	0.049	0.56	// AT1G76470.1 // AT3G21500.1 // AT1G43800.1 // AT3G23510.1 // AT2G11810.1 // AT1G15360.1 // AT1G04580.1 // AT2G23800.1 // AT3G25820.1 // AT1G01280.1
GO:0044255	P	cellular lipid metabolic process	8	244	618	37767	0.05	0.56	// AT3G21500.1 // AT1G43800.1 // AT2G11810.1 // AT1G15360.1 // AT1G04580.1 // AT2G23800.1 // AT3G25820.1 // AT1G01280.1
GO:0080090	P	regulation of primary metabolic process	19	244	1952	37767	0.052	0.56	// AT5G17300.1 // AT4G30180.1 // AT3G10040.1 // AT2G21650.1 // AT1G15360.1 // AT4G36570.1 // AT3G21330.1 // AT2G42830.1 // AT4G05100.1 // AT4G17490.1 // AT4G21440.1 // AT5G60140.1 // AT5G53980.1 // AT2G43140.1 // AT5G37260.1 // AT2G46970.1 // AT1G33760.1 // AT4G37260.1 // AT4G06746.1
GO:0016053	P	organic acid biosynthetic process	6	244	417	37767	0.056	0.59	// AT1G43800.1 // AT1G15360.1 // AT1G70560.1 // AT4G26260.1 // AT1G04580.1 // AT2G39800.1
GO:0046394	P	carboxylic acid biosynthetic process	6	244	417	37767	0.056	0.59	// AT1G43800.1 // AT1G15360.1 // AT1G70560.1 // AT4G26260.1 // AT1G04580.1 // AT2G39800.1
GO:0006355	P	regulation of transcription, DNA-dependent	11	244	987	37767	0.059	0.6	// AT2G21650.1 // AT1G15360.1 // AT2G42830.1 // AT4G05100.1 // AT4G17490.1 // AT5G60140.1 // AT5G53980.1 // AT1G33760.1 // AT4G36570.1 // AT4G37260.1 // AT4G06746.1
GO:0009653	P	anatomical structure morphogenesis	8	244	637	37767	0.058	0.6	// AT1G01280.1 // AT5G14380.1 // AT1G20190.1 // AT1G21270.1 // AT4G14550.1 // AT3G11980.1 // AT1G70560.1 // AT2G13680.1
GO:0051252	P	regulation of RNA metabolic process	11	244	996	37767	0.062	0.61	// AT2G21650.1 // AT1G15360.1 // AT2G42830.1 // AT4G05100.1 // AT4G17490.1 // AT5G60140.1 // AT5G53980.1 // AT1G33760.1 // AT4G36570.1 // AT4G37260.1 // AT4G06746.1
GO:0010468	P	regulation of gene expression	19	244	2001	37767	0.063	0.61	// AT5G17300.1 // AT4G30180.1 // AT3G10040.1 // AT2G21650.1 // AT1G15360.1 // AT4G36570.1 // AT3G21330.1 // AT2G42830.1 // AT4G05100.1 // AT4G17490.1 // AT4G21440.1 // AT5G60140.1 // AT5G53980.1 // AT2G43140.1 // AT5G37260.1 // AT2G46970.1 // AT1G33760.1 // AT4G37260.1 // AT4G06746.1
GO:0050794	P	regulation of cellular process	29	244	3375	37767	0.072	0.69	// AT1G69260.1 // AT4G18960.1 // AT3G10040.1 // AT1G15360.1 // AT5G37260.1 // AT4G17490.1 // AT4G30180.1 // AT4G36570.1 // AT4G14690.1 // AT1G70560.1 // AT4G21440.1 // AT2G42830.1 // AT5G60140.1 // AT5G53980.1 // AT1G33760.1 // AT4G06746.1 // AT5G17300.1 // AT2G17950.1 // AT5G41550.1 // AT5G15960.1 // AT4G24580.1 // AT4G33040.1 // AT2G43140.1 // AT4G37260.1 // AT3G21330.1 // AT2G21650.1 // AT2G46…
GO:0060255	P	regulation of macromolecule metabolic process	19	244	2060	37767	0.078	0.71	// AT5G17300.1 // AT4G30180.1 // AT3G10040.1 // AT2G21650.1 // AT1G15360.1 // AT4G36570.1 // AT3G21330.1 // AT2G42830.1 // AT4G05100.1 // AT4G17490.1 // AT4G21440.1 // AT5G60140.1 // AT5G53980.1 // AT2G43140.1 // AT5G37260.1 // AT2G46970.1 // AT1G33760.1 // AT4G37260.1 // AT4G06746.1
GO:0006351	P	transcription, DNA-dependent	11	244	1039	37767	0.078	0.71	// AT2G21650.1 // AT1G15360.1 // AT2G42830.1 // AT4G05100.1 // AT4G17490.1 // AT5G60140.1 // AT5G53980.1 // AT1G33760.1 // AT4G36570.1 // AT4G37260.1 // AT4G06746.1
GO:0032774	P	RNA biosynthetic process	11	244	1040	37767	0.078	0.71	// AT2G21650.1 // AT1G15360.1 // AT2G42830.1 // AT4G05100.1 // AT4G17490.1 // AT5G60140.1 // AT5G53980.1 // AT1G33760.1 // AT4G36570.1 // AT4G37260.1 // AT4G06746.1
GO:0019222	P	regulation of metabolic process	20	244	2210	37767	0.083	0.74	// AT5G17300.1 // AT4G14690.1 // AT4G30180.1 // AT3G10040.1 // AT2G21650.1 // AT1G15360.1 // AT4G36570.1 // AT3G21330.1 // AT2G42830.1 // AT4G05100.1 // AT4G17490.1 // AT4G21440.1 // AT5G60140.1 // AT5G53980.1 // AT2G43140.1 // AT5G37260.1 // AT2G46970.1 // AT1G33760.1 // AT4G37260.1 // AT4G06746.1
GO:0030154	P	cell differentiation	5	244	355	37767	0.083	0.74	// AT2G17950.1 // AT4G24972.1 // AT1G70560.1 // AT4G18960.1 // AT5G14380.1
GO:0009416	P	response to light stimulus	7	244	596	37767	0.095	0.83	// AT4G14690.1 // AT3G25050.1 // AT5G15960.1 // AT1G70560.1 // AT3G47340.1 // AT5G53980.1 // AT2G46970.1
GO:0009908	P	flower development	5	244	377	37767	0.1	0.87	// AT4G24972.1 // AT2G42830.1 // AT1G70560.1 // AT4G18960.1 // AT5G37260.1
GO:0003006	P	reproductive developmental process	10	244	978	37767	0.11	0.89	// AT2G21650.1 // AT4G18960.1 // AT5G14380.1 // AT3G25050.1 // AT5G49360.1 // AT2G42830.1 // AT5G37260.1 // AT4G24972.1 // AT4G13560.1 // AT1G70560.1
GO:0009314	P	response to radiation	7	244	613	37767	0.11	0.89	// AT4G14690.1 // AT3G25050.1 // AT5G15960.1 // AT1G70560.1 // AT3G47340.1 // AT5G53980.1 // AT2G46970.1
GO:0050789	P	regulation of biological process	30	244	3697	37767	0.12	0.96	// AT1G69260.1 // AT4G18960.1 // AT3G10040.1 // AT1G15360.1 // AT5G37260.1 // AT4G17490.1 // AT4G30180.1 // AT4G36570.1 // AT4G14690.1 // AT1G70560.1 // AT4G21440.1 // AT2G42830.1 // AT5G60140.1 // AT5G53980.1 // AT3G48360.1 // AT4G06746.1 // AT5G17300.1 // AT2G17950.1 // AT5G41550.1 // AT5G15960.1 // AT4G24580.1 // AT4G33040.1 // AT2G43140.1 // AT1G33760.1 // AT4G37260.1 // AT3G21330.1 // AT2G21…
GO:0007165	P	signal transduction	7	244	1228	37767	0.68	1	// AT1G69260.1 // AT5G41550.1 // AT1G15360.1 // AT5G15960.1 // AT4G17490.1 // AT2G46970.1 // AT4G24580.1
GO:0051716	P	cellular response to stimulus	8	244	840	37767	0.18	1	// AT1G69260.1 // AT3G09922.1 // AT2G11810.1 // AT1G15360.1 // AT5G15960.1 // AT4G17490.1 // AT3G47340.1 // AT2G46970.1
GO:0048513	P	organ development	7	244	838	37767	0.3	1	// AT4G18960.1 // AT1G70560.1 // AT2G17950.1 // AT4G14550.1 // AT2G42830.1 // AT4G24972.1 // AT2G39800.1
GO:0016310	P	phosphorylation	8	244	1079	37767	0.4	1	// AT2G16750.1 // AT5G61350.1 // AT4G21400.1 // AT2G18470.1 // AT1G21270.1 // AT4G14780.1 // AT4G11460.1 // AT1G65790.1
GO:0051704	P	multi-organism process	8	244	776	37767	0.13	1	// AT5G07530.1 // AT1G75050.1 // AT5G14380.1 // AT2G14610.1 // AT4G12470.1 // AT4G24580.1 // AT2G46440.1 // AT1G65790.1
GO:0019538	P	protein metabolic process	17	244	4009	37767	0.98	1	// AT4G21400.1 // AT2G23010.1 // AT5G09500.1 // AT4G11460.1 // AT2G16750.1 // AT5G59810.1 // AT2G18470.1 // AT4G22050.1 // AT5G22980.1 // AT4G14780.1 // AT4G25110.1 // AT1G60190.1 // AT2G45040.1 // AT5G61350.1 // AT1G71770.1 // AT1G65790.1 // AT1G21270.1
GO:0007154	P	cell communication	6	244	1399	37767	0.89	1	// AT5G07530.1 // AT3G09922.1 // AT2G11810.1 // AT4G24580.1 // AT3G47340.1 // AT1G65790.1
GO:0034645	P	cellular macromolecule biosynthetic process	22	244	3661	37767	0.67	1	// AT3G10040.1 // AT1G15360.1 // AT5G37260.1 // AT4G17490.1 // AT4G30180.1 // AT4G36570.1 // AT5G09500.1 // AT4G21440.1 // AT2G42830.1 // AT5G60140.1 // AT5G53980.1 // AT1G33760.1 // AT1G71770.1 // AT4G06746.1 // AT5G17300.1 // AT3G21330.1 // AT2G43140.1 // AT4G37260.1 // AT2G21650.1 // AT4G05100.1 // AT2G13680.1 // AT2G46970.1
GO:0006807	P	nitrogen compound metabolic process	26	244	3826	37767	0.42	1	// AT3G10040.1 // AT1G15360.1 // AT5G37260.1 // AT4G17490.1 // AT4G30180.1 // AT2G39800.1 // AT4G36570.1 // AT4G14690.1 // AT2G42830.1 // AT4G08040.1 // AT4G21440.1 // AT1G70560.1 // AT1G22760.1 // AT5G60140.1 // AT5G53980.1 // AT1G33760.1 // AT1G71770.1 // AT4G06746.1 // AT5G17300.1 // AT3G47340.1 // AT3G21330.1 // AT2G43140.1 // AT4G37260.1 // AT2G21650.1 // AT4G05100.1 // AT2G46970.1
GO:0043170	P	macromolecule metabolic process	38	244	7127	37767	0.92	1	// AT4G21400.1 // AT3G10040.1 // AT2G23010.1 // AT1G15360.1 // AT5G37260.1 // AT4G17490.1 // AT4G30180.1 // AT4G36570.1 // AT2G16750.1 // AT5G09500.1 // AT1G21270.1 // AT2G18470.1 // AT4G22050.1 // AT4G21440.1 // AT2G42830.1 // AT1G22760.1 // AT1G60190.1 // AT5G60140.1 // AT5G53980.1 // AT1G33760.1 // AT1G71770.1 // AT4G06746.1 // AT2G45040.1 // AT5G17300.1 // AT5G59810.1 // AT5G22980.1 // AT4G14…
GO:0044267	P	cellular protein metabolic process	11	244	3487	37767	1	1	// AT4G21400.1 // AT5G09500.1 // AT4G11460.1 // AT2G16750.1 // AT2G18470.1 // AT1G21270.1 // AT4G14780.1 // AT1G60190.1 // AT5G61350.1 // AT1G71770.1 // AT1G65790.1
GO:0044262	P	cellular carbohydrate metabolic process	5	244	417	37767	0.14	1	// AT1G04580.1 // AT5G65690.1 // AT2G13680.1 // AT4G10260.1 // AT3G20520.1
GO:0044260	P	cellular macromolecule metabolic process	32	244	6447	37767	0.96	1	// AT4G21400.1 // AT3G10040.1 // AT1G15360.1 // AT5G37260.1 // AT4G17490.1 // AT4G30180.1 // AT4G21440.1 // AT2G16750.1 // AT5G09500.1 // AT1G21270.1 // AT2G18470.1 // AT4G36570.1 // AT2G42830.1 // AT1G22760.1 // AT1G60190.1 // AT5G60140.1 // AT5G53980.1 // AT1G33760.1 // AT1G71770.1 // AT4G06746.1 // AT5G17300.1 // AT4G14780.1 // AT3G21330.1 // AT5G61350.1 // AT2G43140.1 // AT4G37260.1 // AT2G21…
GO:0016043	P	cellular component organization	8	244	1179	37767	0.49	1	// AT1G01280.1 // AT5G14380.1 // AT1G20190.1 // AT1G21270.1 // AT3G11980.1 // AT5G59370.1 // AT2G13680.1 // AT4G29340.1
GO:0065007	P	biological regulation	33	244	4188	37767	0.14	1	// AT1G69260.1 // AT4G18960.1 // AT3G10040.1 // AT1G15360.1 // AT5G37260.1 // AT4G17490.1 // AT4G30180.1 // AT4G36570.1 // AT4G14690.1 // AT1G21270.1 // AT1G20190.1 // AT4G21440.1 // AT2G42830.1 // AT5G60140.1 // AT5G53980.1 // AT3G48360.1 // AT4G06746.1 // AT5G17300.1 // AT2G17950.1 // AT5G41550.1 // AT5G15960.1 // AT4G24580.1 // AT4G33040.1 // AT2G43140.1 // AT1G33760.1 // AT4G37260.1 // AT3G21…
GO:0065008	P	regulation of biological quality	6	244	665	37767	0.26	1	// AT1G21270.1 // AT1G20190.1 // AT5G14380.1 // AT1G70560.1 // AT4G33040.1 // AT1G60740.1
GO:0006952	P	defense response	5	244	766	37767	0.55	1	// AT4G38700.1 // AT2G14610.1 // AT2G43530.1 // AT5G41550.1 // AT4G12470.1
GO:0008152	P	metabolic process	62	244	10614	37767	0.84	1	// AT4G21400.1 // AT1G43800.1 // AT1G76470.1 // AT3G10040.1 // AT2G23010.1 // AT1G15360.1 // AT5G37260.1 // AT2G23800.1 // AT4G17490.1 // AT5G61350.1 // AT4G30180.1 // AT2G01918.1 // AT2G39800.1 // AT4G36570.1 // AT2G16750.1 // AT5G09500.1 // AT4G14690.1 // AT4G10260.1 // AT3G23510.1 // AT1G21270.1 // AT4G08040.1 // AT2G18470.1 // AT4G22050.1 // AT3G20520.1 // AT4G21440.1 // AT1G04580.1 // AT2G42…
GO:0016070	P	RNA metabolic process	13	244	1657	37767	0.28	1	// AT2G21650.1 // AT1G15360.1 // AT2G42830.1 // AT4G05100.1 // AT4G17490.1 // AT1G22760.1 // AT5G60140.1 // AT5G53980.1 // AT1G33760.1 // AT1G71770.1 // AT4G36570.1 // AT4G37260.1 // AT4G06746.1
GO:0043412	P	macromolecule modification	9	244	1636	37767	0.73	1	// AT2G16750.1 // AT5G61350.1 // AT4G21400.1 // AT2G18470.1 // AT1G21270.1 // AT4G14780.1 // AT1G60190.1 // AT4G11460.1 // AT1G65790.1
GO:0044249	P	cellular biosynthetic process	36	244	4925	37767	0.24	1	// AT1G76470.1 // AT1G43800.1 // AT3G10040.1 // AT1G15360.1 // AT5G37260.1 // AT2G23800.1 // AT4G17490.1 // AT4G30180.1 // AT2G39800.1 // AT4G36570.1 // AT5G09500.1 // AT4G14690.1 // AT1G70560.1 // AT4G08040.1 // AT4G21440.1 // AT1G04580.1 // AT2G42830.1 // AT4G26260.1 // AT5G60140.1 // AT5G53980.1 // AT1G33760.1 // AT1G71770.1 // AT4G06746.1 // AT5G17300.1 // AT1G01280.1 // AT3G21330.1 // AT3G25…
GO:0034641	P	cellular nitrogen compound metabolic process	5	244	506	37767	0.23	1	// AT4G08040.1 // AT1G70560.1 // AT2G39800.1 // AT4G14690.1 // AT3G47340.1
GO:0006139	P	nucleobase, nucleoside, nucleotide and nucleic acid metabolic process	21	244	3198	37767	0.5	1	// AT5G17300.1 // AT5G37260.1 // AT4G30180.1 // AT3G10040.1 // AT2G21650.1 // AT1G15360.1 // AT4G36570.1 // AT3G21330.1 // AT2G42830.1 // AT4G05100.1 // AT4G17490.1 // AT4G21440.1 // AT5G60140.1 // AT5G53980.1 // AT1G22760.1 // AT2G43140.1 // AT1G71770.1 // AT2G46970.1 // AT1G33760.1 // AT4G37260.1 // AT4G06746.1
GO:0006508	P	proteolysis	6	244	810	37767	0.43	1	// AT2G45040.1 // AT2G23010.1 // AT5G59810.1 // AT4G22050.1 // AT5G22980.1 // AT4G25110.1
GO:0048608	P	reproductive structure development	9	244	978	37767	0.19	1	// AT2G21650.1 // AT4G18960.1 // AT1G70560.1 // AT3G25050.1 // AT5G49360.1 // AT2G42830.1 // AT5G37260.1 // AT4G24972.1 // AT4G13560.1
GO:0043687	P	post-translational protein modification	9	244	1248	37767	0.42	1	// AT2G16750.1 // AT5G61350.1 // AT4G21400.1 // AT2G18470.1 // AT1G21270.1 // AT4G14780.1 // AT1G60190.1 // AT4G11460.1 // AT1G65790.1
GO:0009987	P	cellular process	71	244	11684	37767	0.75	1	// AT4G21400.1 // AT3G47340.1 // AT1G69260.1 // AT4G18960.1 // AT1G76470.1 // AT3G10040.1 // AT5G07530.1 // AT1G15360.1 // AT5G37260.1 // AT2G23800.1 // AT4G17490.1 // AT1G54560.1 // AT4G30180.1 // AT2G01918.1 // AT1G43800.1 // AT2G39800.1 // AT4G36570.1 // AT1G08730.1 // AT2G16750.1 // AT5G09500.1 // AT4G14690.1 // AT4G10260.1 // AT2G42830.1 // AT4G08040.1 // AT1G20190.1 // AT2G18470.1 // AT3G20…
GO:0007242	P	intracellular signaling cascade	6	244	659	37767	0.26	1	// AT1G69260.1 // AT1G15360.1 // AT5G15960.1 // AT4G24580.1 // AT2G46970.1 // AT4G17490.1
GO:0048731	P	system development	7	244	839	37767	0.3	1	// AT4G18960.1 // AT1G70560.1 // AT2G17950.1 // AT4G14550.1 // AT2G42830.1 // AT4G24972.1 // AT2G39800.1
GO:0010467	P	gene expression	22	244	3962	37767	0.8	1	// AT3G10040.1 // AT1G15360.1 // AT5G37260.1 // AT4G17490.1 // AT4G30180.1 // AT4G36570.1 // AT5G09500.1 // AT4G21440.1 // AT2G42830.1 // AT1G22760.1 // AT5G60140.1 // AT5G53980.1 // AT1G33760.1 // AT1G71770.1 // AT4G06746.1 // AT5G17300.1 // AT3G21330.1 // AT2G43140.1 // AT4G37260.1 // AT2G21650.1 // AT4G05100.1 // AT2G46970.1
GO:0006468	P	protein amino acid phosphorylation	8	244	946	37767	0.27	1	// AT2G16750.1 // AT5G61350.1 // AT4G21400.1 // AT2G18470.1 // AT1G21270.1 // AT4G14780.1 // AT4G11460.1 // AT1G65790.1
GO:0006464	P	protein modification process	9	244	1474	37767	0.61	1	// AT2G16750.1 // AT5G61350.1 // AT4G21400.1 // AT2G18470.1 // AT1G21270.1 // AT4G14780.1 // AT1G60190.1 // AT4G11460.1 // AT1G65790.1
GO:0009058	P	biosynthetic process	37	244	5118	37767	0.26	1	// AT1G76470.1 // AT1G43800.1 // AT3G10040.1 // AT1G15360.1 // AT5G37260.1 // AT2G23800.1 // AT4G17490.1 // AT4G30180.1 // AT2G39800.1 // AT4G36570.1 // AT5G09500.1 // AT4G14690.1 // AT3G23510.1 // AT1G70560.1 // AT4G08040.1 // AT4G21440.1 // AT1G04580.1 // AT2G42830.1 // AT4G26260.1 // AT5G60140.1 // AT5G53980.1 // AT1G33760.1 // AT1G71770.1 // AT4G06746.1 // AT5G17300.1 // AT1G01280.1 // AT3G21…
GO:0009059	P	macromolecule biosynthetic process	22	244	3685	37767	0.68	1	// AT3G10040.1 // AT1G15360.1 // AT5G37260.1 // AT4G17490.1 // AT4G30180.1 // AT4G36570.1 // AT5G09500.1 // AT4G21440.1 // AT2G42830.1 // AT5G60140.1 // AT5G53980.1 // AT1G33760.1 // AT1G71770.1 // AT4G06746.1 // AT5G17300.1 // AT3G21330.1 // AT2G43140.1 // AT4G37260.1 // AT2G21650.1 // AT4G05100.1 // AT2G13680.1 // AT2G46970.1
GO:0044238	P	primary metabolic process	54	244	8995	37767	0.75	1	// AT4G21400.1 // AT1G43800.1 // AT1G76470.1 // AT3G10040.1 // AT2G23010.1 // AT1G15360.1 // AT5G37260.1 // AT2G23800.1 // AT4G17490.1 // AT4G30180.1 // AT2G39800.1 // AT4G36570.1 // AT2G16750.1 // AT5G09500.1 // AT4G10260.1 // AT3G23510.1 // AT1G21270.1 // AT4G08040.1 // AT2G18470.1 // AT4G22050.1 // AT3G20520.1 // AT4G21440.1 // AT1G04580.1 // AT2G42830.1 // AT1G22760.1 // AT1G60190.1 // AT5G60…
GO:0005975	P	carbohydrate metabolic process	7	244	866	37767	0.33	1	// AT4G10260.1 // AT1G21270.1 // AT4G26830.1 // AT3G20520.1 // AT5G65690.1 // AT2G13680.1 // AT1G04580.1
GO:0044237	P	cellular metabolic process	52	244	8722	37767	0.77	1	// AT4G21400.1 // AT1G43800.1 // AT1G76470.1 // AT3G10040.1 // AT1G15360.1 // AT5G37260.1 // AT2G23800.1 // AT4G17490.1 // AT4G30180.1 // AT2G01918.1 // AT2G39800.1 // AT4G36570.1 // AT2G16750.1 // AT5G09500.1 // AT4G14690.1 // AT4G10260.1 // AT1G21270.1 // AT4G08040.1 // AT2G18470.1 // AT3G20520.1 // AT4G21440.1 // AT1G04580.1 // AT2G42830.1 // AT4G26260.1 // AT1G60190.1 // AT5G60140.1 // AT1G77…
GO:0006796	P	phosphate metabolic process	8	244	1178	37767	0.49	1	// AT2G16750.1 // AT5G61350.1 // AT4G21400.1 // AT2G18470.1 // AT1G21270.1 // AT4G14780.1 // AT4G11460.1 // AT1G65790.1
GO:0006793	P	phosphorus metabolic process	8	244	1179	37767	0.49	1	// AT2G16750.1 // AT5G61350.1 // AT4G21400.1 // AT2G18470.1 // AT1G21270.1 // AT4G14780.1 // AT4G11460.1 // AT1G65790.1
Molecular process
GO:0008289	F	lipid binding	15	244	323	37767	6.4e-09	1.7e-06	// AT1G66850.1 // AT4G33355.1 // AT5G07530.1 // AT4G12470.1 // AT5G07550.1 // AT1G62510.1 // AT5G07510.1 // AT5G07520.1 // AT4G15160.1 // AT5G07560.1 // AT4G08670.1 // AT5G07230.1 // AT1G18280.1 // AT4G12500.1 // AT4G24580.1
GO:0016209	F	antioxidant activity	7	244	150	37767	7.4e-05	0.01	// AT4G30170.1 // AT4G31870.1 // AT1G60740.1 // AT1G49570.1 // AT5G47000.1 // AT4G11290.1 // AT5G19890.1
GO:0016798	F	hydrolase activity, acting on glycosyl bonds	12	244	526	37767	0.00021	0.012	// AT2G44460.1 // AT4G26830.1 // AT3G13750.1 // AT5G57560.1 // AT4G16260.1 // AT5G47000.1 // AT5G20710.1 // AT3G57520.1 // AT2G36190.1 // AT3G25050.1 // AT5G49360.1 // AT5G09730.1
GO:0004601	F	peroxidase activity	6	244	127	37767	0.00023	0.012	// AT4G30170.1 // AT4G31870.1 // AT1G49570.1 // AT5G47000.1 // AT4G11290.1 // AT5G19890.1
GO:0016684	F	oxidoreductase activity, acting on peroxide as acceptor	6	244	127	37767	0.00023	0.012	// AT4G30170.1 // AT4G31870.1 // AT1G49570.1 // AT5G47000.1 // AT4G11290.1 // AT5G19890.1
GO:0046906	F	tetrapyrrole binding	6	244	136	37767	0.00033	0.015	// AT4G30170.1 // AT4G14690.1 // AT1G49570.1 // AT3G61035.1 // AT4G11290.1 // AT5G19890.1
GO:0020037	F	heme binding	5	244	97	37767	0.00053	0.02	// AT4G30170.1 // AT5G19890.1 // AT3G61035.1 // AT1G49570.1 // AT4G11290.1
GO:0016491	F	oxidoreductase activity	21	244	1463	37767	0.00064	0.022	// AT5G25880.1 // AT1G76470.1 // AT4G30170.1 // AT1G43800.1 // AT4G31870.1 // AT3G23510.1 // AT5G19890.1 // AT1G01280.1 // AT1G14520.1 // AT1G49570.1 // AT3G11980.1 // AT1G04580.1 // AT4G26260.1 // AT3G61035.1 // AT4G33040.1 // AT4G11290.1 // AT1G77120.1 // AT5G47000.1 // AT2G39800.1 // AT1G60740.1 // AT5G02540.1
GO:0004553	F	hydrolase activity, hydrolyzing O-glycosyl compounds	10	244	476	37767	0.0013	0.038	// AT2G44460.1 // AT4G26830.1 // AT3G13750.1 // AT4G16260.1 // AT5G47000.1 // AT5G20710.1 // AT3G57520.1 // AT2G36190.1 // AT5G49360.1 // AT5G09730.1
GO:0003824	F	catalytic activity	82	244	9638	37767	0.003	0.082	// AT4G21400.1 // AT3G47340.1 // AT4G30170.1 // AT1G43800.1 // AT1G76470.1 // AT5G45820.1 // AT1G14520.1 // AT4G16590.1 // AT1G49570.1 // AT1G54560.1 // AT2G23800.1 // AT4G16260.1 // AT3G52310.1 // AT5G61350.1 // AT5G20710.1 // AT3G57520.1 // AT3G61035.1 // AT2G39800.1 // AT5G61160.1 // AT5G09730.1 // AT3G28510.1 // AT1G56360.1 // AT2G44460.1 // AT2G46880.1 // AT1G70290.1 // AT4G36350.1 // AT3G23…
GO:0009055	F	electron carrier activity	7	244	294	37767	0.0035	0.085	// AT4G30170.1 // AT3G61035.1 // AT3G23510.1 // AT1G49570.1 // AT4G33040.1 // AT4G11290.1 // AT5G19890.1
GO:0005506	F	iron ion binding	5	244	161	37767	0.0045	0.1	// AT4G30170.1 // AT5G19890.1 // AT3G61035.1 // AT1G49570.1 // AT4G11290.1
GO:0016758	F	transferase activity, transferring hexosyl groups	7	244	340	37767	0.0074	0.14	// AT1G70290.1 // AT3G25050.1 // AT2G11810.1 // AT4G16590.1 // AT5G57560.1 // AT2G13680.1 // AT2G29740.1
GO:0030528	F	transcription regulator activity	26	244	2417	37767	0.0081	0.14	// AT4G18960.1 // AT3G10040.1 // AT3G24520.1 // AT1G15360.1 // AT5G37260.1 // AT4G17490.1 // AT4G30180.1 // AT4G36570.1 // AT2G13570.1 // AT4G21440.1 // AT2G42830.1 // AT5G60140.1 // AT5G53980.1 // AT3G48360.1 // AT4G06746.1 // AT5G17300.1 // AT2G17950.1 // AT4G14550.1 // AT3G21330.1 // AT2G43140.1 // AT1G33760.1 // AT4G37260.1 // AT2G21650.1 // AT5G63160.1 // AT4G05100.1 // AT2G46970.1
GO:0003700	F	transcription factor activity	24	244	2173	37767	0.008	0.14	// AT4G18960.1 // AT3G10040.1 // AT3G24520.1 // AT1G15360.1 // AT5G37260.1 // AT4G17490.1 // AT4G30180.1 // AT4G36570.1 // AT2G13570.1 // AT4G21440.1 // AT2G42830.1 // AT5G60140.1 // AT5G53980.1 // AT1G33760.1 // AT4G06746.1 // AT5G17300.1 // AT2G17950.1 // AT4G14550.1 // AT3G21330.1 // AT2G43140.1 // AT4G37260.1 // AT2G21650.1 // AT4G05100.1 // AT2G46970.1
GO:0019825	F	oxygen binding	5	244	255	37767	0.027	0.42	// AT5G25130.1 // AT4G20240.1 // AT2G46950.1 // AT2G16060.1 // AT1G01280.1
GO:0016787	F	hydrolase activity	32	244	3468	37767	0.027	0.42	// AT1G54560.1 // AT4G16260.1 // AT3G52310.1 // AT5G20710.1 // AT3G57520.1 // AT5G09730.1 // AT1G56360.1 // AT2G44460.1 // AT1G70290.1 // AT4G36350.1 // AT3G28510.1 // AT4G22050.1 // AT2G47050.1 // AT4G25750.1 // AT3G20520.1 // AT2G46880.1 // AT4G26830.1 // AT1G08730.1 // AT2G18130.1 // AT2G45040.1 // AT2G23010.1 // AT1G80660.1 // AT1G75930.1 // AT5G41550.1 // AT3G13750.1 // AT5G47000.1 // AT5G49…
GO:0016757	F	transferase activity, transferring glycosyl groups	7	244	544	37767	0.066	0.94	// AT1G70290.1 // AT3G25050.1 // AT2G11810.1 // AT4G16590.1 // AT5G57560.1 // AT2G13680.1 // AT2G29740.1
GO:0016829	F	lyase activity	6	244	430	37767	0.063	0.94	// AT1G70560.1 // AT4G08040.1 // AT4G22080.1 // AT5G65690.1 // AT4G33070.1 // AT3G25820.1
GO:0022804	F	active transmembrane transporter activity	8	244	664	37767	0.07	0.94	// AT4G28700.1 // AT1G07340.1 // AT4G25750.1 // AT4G35180.1 // AT3G52310.1 // AT4G32510.1 // AT3G54700.1 // AT1G80660.1
GO:0005198	F	structural molecule activity	6	244	659	37767	0.26	1	// AT1G21310.1 // AT5G09500.1 // AT3G22142.1 // AT1G76930.1 // AT5G59370.1 // AT4G15160.1
GO:0000166	F	nucleotide binding	8	244	2267	37767	0.98	1	// AT2G16750.1 // AT3G28510.1 // AT2G18470.1 // AT1G72960.1 // AT5G41550.1 // AT5G65690.1 // AT1G21320.1 // AT2G46440.1
GO:0016740	F	transferase activity	26	244	3321	37767	0.18	1	// AT4G21400.1 // AT4G16590.1 // AT2G23800.1 // AT4G01950.1 // AT5G61160.1 // AT2G16750.1 // AT1G70290.1 // AT4G10260.1 // AT3G23510.1 // AT1G21270.1 // AT2G18470.1 // AT5G45820.1 // AT1G70560.1 // AT3G25050.1 // AT1G75930.1 // AT4G14780.1 // AT5G61350.1 // AT3G21500.1 // AT4G11460.1 // AT1G65790.1 // AT2G11810.1 // AT5G57560.1 // AT2G13680.1 // AT3G56600.1 // AT4G33070.1 // AT2G29740.1
GO:0042578	F	phosphoric ester hydrolase activity	6	244	481	37767	0.095	1	// AT1G70290.1 // AT4G36350.1 // AT3G20520.1 // AT2G46880.1 // AT1G56360.1 // AT2G18130.1
GO:0016818	F	hydrolase activity, acting on acid anhydrides, in phosphorus-containing anhydrides	7	244	837	37767	0.3	1	// AT1G80660.1 // AT3G28510.1 // AT5G41550.1 // AT4G25750.1 // AT3G52310.1 // AT1G08730.1 // AT1G54560.1
GO:0030554	F	adenyl nucleotide binding	5	244	1465	37767	0.96	1	// AT5G65690.1 // AT2G18470.1 // AT3G28510.1 // AT5G41550.1 // AT2G16750.1
GO:0008270	F	zinc ion binding	5	244	1299	37767	0.92	1	// AT1G60190.1 // AT5G22920.1 // AT4G02075.1 // AT1G14200.1 // AT1G02610.1
GO:0016817	F	hydrolase activity, acting on acid anhydrides	7	244	839	37767	0.3	1	// AT1G80660.1 // AT3G28510.1 // AT5G41550.1 // AT4G25750.1 // AT3G52310.1 // AT1G08730.1 // AT1G54560.1
GO:0005488	F	binding	82	244	11258	37767	0.11	1	// AT4G20240.1 // AT1G76470.1 // AT1G66850.1 // AT4G30170.1 // AT1G43800.1 // AT4G18960.1 // AT1G26330.1 // AT3G10040.1 // AT3G24520.1 // AT1G15360.1 // AT1G62510.1 // AT1G54560.1 // AT5G07510.1 // AT4G16260.1 // AT5G56510.1 // AT4G30180.1 // AT2G01918.1 // AT4G36570.1 // AT4G24580.1 // AT1G08730.1 // AT2G16750.1 // AT5G22920.1 // AT5G07230.1 // AT4G14690.1 // AT1G14200.1 // AT1G70560.1 // AT1G75…
GO:0003676	F	nucleic acid binding	30	244	4842	37767	0.63	1	// AT4G18960.1 // AT1G26330.1 // AT3G10040.1 // AT3G24520.1 // AT1G15360.1 // AT5G37260.1 // AT4G17490.1 // AT5G56510.1 // AT4G30180.1 // AT4G36570.1 // AT2G13570.1 // AT4G21440.1 // AT2G42830.1 // AT1G22760.1 // AT5G60140.1 // AT5G53980.1 // AT1G33760.1 // AT1G71770.1 // AT4G06746.1 // AT5G17300.1 // AT2G17950.1 // AT4G14550.1 // AT3G21330.1 // AT2G43140.1 // AT4G37260.1 // AT2G21650.1 // AT4G05…
GO:0003677	F	DNA binding	25	244	2892	37767	0.086	1	// AT4G18960.1 // AT1G26330.1 // AT3G10040.1 // AT3G24520.1 // AT1G15360.1 // AT5G37260.1 // AT4G17490.1 // AT4G30180.1 // AT4G36570.1 // AT2G13570.1 // AT4G21440.1 // AT2G42830.1 // AT5G60140.1 // AT5G53980.1 // AT1G33760.1 // AT4G06746.1 // AT5G17300.1 // AT2G17950.1 // AT4G14550.1 // AT3G21330.1 // AT2G43140.1 // AT4G37260.1 // AT2G21650.1 // AT4G05100.1 // AT2G46970.1
GO:0017076	F	purine nucleotide binding	5	244	1713	37767	0.99	1	// AT5G65690.1 // AT2G18470.1 // AT3G28510.1 // AT5G41550.1 // AT2G16750.1
GO:0005524	F	ATP binding	5	244	1377	37767	0.94	1	// AT5G65690.1 // AT2G18470.1 // AT3G28510.1 // AT5G41550.1 // AT2G16750.1
GO:0016301	F	kinase activity	11	244	1641	37767	0.49	1	// AT4G21400.1 // AT4G11460.1 // AT4G10260.1 // AT2G16750.1 // AT2G18470.1 // AT1G21270.1 // AT5G45820.1 // AT4G14780.1 // AT3G56600.1 // AT5G61350.1 // AT1G65790.1
GO:0043169	F	cation binding	15	244	2087	37767	0.37	1	// AT5G22920.1 // AT4G30170.1 // AT1G43800.1 // AT3G61035.1 // AT1G14200.1 // AT4G26830.1 // AT1G02610.1 // AT2G01918.1 // AT1G49570.1 // AT4G16260.1 // AT1G60190.1 // AT4G11290.1 // AT4G33070.1 // AT5G19890.1 // AT4G02075.1
GO:0016788	F	hydrolase activity, acting on ester bonds	9	244	1200	37767	0.37	1	// AT1G70290.1 // AT4G36350.1 // AT1G75930.1 // AT2G47050.1 // AT2G26450.1 // AT3G20520.1 // AT2G46880.1 // AT1G56360.1 // AT2G18130.1
GO:0022892	F	substrate-specific transporter activity	10	244	1059	37767	0.15	1	// AT4G35180.1 // AT4G26590.1 // AT1G07340.1 // AT1G22150.1 // AT4G28700.1 // AT4G32510.1 // AT2G46440.1 // AT2G16060.1 // AT3G54700.1 // AT1G80660.1
GO:0016772	F	transferase activity, transferring phosphorus-containing groups	11	244	1887	37767	0.68	1	// AT4G21400.1 // AT4G11460.1 // AT4G10260.1 // AT2G16750.1 // AT2G18470.1 // AT1G21270.1 // AT5G45820.1 // AT4G14780.1 // AT3G56600.1 // AT5G61350.1 // AT1G65790.1
GO:0015075	F	ion transmembrane transporter activity	7	244	655	37767	0.14	1	// AT4G28700.1 // AT1G07340.1 // AT1G22150.1 // AT4G32510.1 // AT2G46440.1 // AT3G54700.1 // AT1G80660.1
GO:0032555	F	purine ribonucleotide binding	5	244	1631	37767	0.98	1	// AT5G65690.1 // AT2G18470.1 // AT3G28510.1 // AT5G41550.1 // AT2G16750.1
GO:0032553	F	ribonucleotide binding	5	244	1631	37767	0.98	1	// AT5G65690.1 // AT2G18470.1 // AT3G28510.1 // AT5G41550.1 // AT2G16750.1
GO:0016791	F	phosphatase activity	5	244	407	37767	0.13	1	// AT2G46880.1 // AT1G70290.1 // AT2G18130.1 // AT4G36350.1 // AT1G56360.1
GO:0043167	F	ion binding	15	244	2087	37767	0.37	1	// AT5G22920.1 // AT4G30170.1 // AT1G43800.1 // AT3G61035.1 // AT1G14200.1 // AT4G26830.1 // AT1G02610.1 // AT2G01918.1 // AT1G49570.1 // AT4G16260.1 // AT1G60190.1 // AT4G11290.1 // AT4G33070.1 // AT5G19890.1 // AT4G02075.1
GO:0022891	F	substrate-specific transmembrane transporter activity	8	244	908	37767	0.24	1	// AT4G35180.1 // AT1G07340.1 // AT1G22150.1 // AT4G28700.1 // AT4G32510.1 // AT2G46440.1 // AT3G54700.1 // AT1G80660.1
GO:0005215	F	transporter activity	14	244	1477	37767	0.1	1	// AT4G35180.1 // AT4G26590.1 // AT1G07340.1 // AT4G27970.1 // AT4G25750.1 // AT2G02020.1 // AT1G22150.1 // AT4G28700.1 // AT4G32510.1 // AT2G46440.1 // AT3G52310.1 // AT2G16060.1 // AT3G54700.1 // AT1G80660.1
GO:0046872	F	metal ion binding	13	244	1997	37767	0.53	1	// AT5G22920.1 // AT4G30170.1 // AT1G43800.1 // AT3G61035.1 // AT1G14200.1 // AT1G02610.1 // AT2G01918.1 // AT1G49570.1 // AT1G60190.1 // AT4G11290.1 // AT4G33070.1 // AT5G19890.1 // AT4G02075.1
GO:0016773	F	phosphotransferase activity, alcohol group as acceptor	8	244	1154	37767	0.47	1	// AT2G16750.1 // AT4G10260.1 // AT1G21270.1 // AT2G18470.1 // AT5G45820.1 // AT4G14780.1 // AT3G56600.1 // AT1G65790.1
GO:0005515	F	protein binding	17	244	2944	37767	0.72	1	// AT5G22920.1 // AT1G14200.1 // AT2G17950.1 // AT1G02610.1 // AT5G41550.1 // AT4G14550.1 // AT2G42830.1 // AT4G24580.1 // AT1G60190.1 // AT4G29340.1 // AT2G46440.1 // AT1G75580.1 // AT3G48360.1 // AT1G54560.1 // AT5G63160.1 // AT4G02075.1 // AT1G08730.1
GO:0001883	F	purine nucleoside binding	5	244	1465	37767	0.96	1	// AT5G65690.1 // AT2G18470.1 // AT3G28510.1 // AT5G41550.1 // AT2G16750.1
GO:0001882	F	nucleoside binding	5	244	1465	37767	0.96	1	// AT5G65690.1 // AT2G18470.1 // AT3G28510.1 // AT5G41550.1 // AT2G16750.1
GO:0016462	F	pyrophosphatase activity	7	244	832	37767	0.29	1	// AT1G80660.1 // AT3G28510.1 // AT5G41550.1 // AT4G25750.1 // AT3G52310.1 // AT1G08730.1 // AT1G54560.1
GO:0022857	F	transmembrane transporter activity	10	244	1128	37767	0.2	1	// AT4G35180.1 // AT1G07340.1 // AT4G25750.1 // AT1G22150.1 // AT4G28700.1 // AT4G32510.1 // AT2G46440.1 // AT3G52310.1 // AT3G54700.1 // AT1G80660.1
GO:0004674	F	protein serine/threonine kinase activity	5	244	681	37767	0.45	1	// AT1G65790.1 // AT2G18470.1 // AT1G21270.1 // AT5G45820.1 // AT2G16750.1
GO:0004672	F	protein kinase activity	6	244	953	37767	0.58	1	// AT2G16750.1 // AT1G21270.1 // AT2G18470.1 // AT5G45820.1 // AT4G14780.1 // AT1G65790.1
GO:0032559	F	adenyl ribonucleotide binding	5	244	1384	37767	0.95	1	// AT5G65690.1 // AT2G18470.1 // AT3G28510.1 // AT5G41550.1 // AT2G16750.1
GO:0008324	F	cation transmembrane transporter activity	5	244	503	37767	0.23	1	// AT2G46440.1 // AT3G54700.1 // AT4G28700.1 // AT1G80660.1 // AT1G07340.1
GO:0017111	F	nucleoside-triphosphatase activity	7	244	792	37767	0.26	1	// AT1G80660.1 // AT3G28510.1 // AT5G41550.1 // AT4G25750.1 // AT3G52310.1 // AT1G08730.1 // AT1G54560.1
GO:0046914	F	transition metal ion binding	11	244	1618	37767	0.48	1	// AT5G22920.1 // AT4G30170.1 // AT1G43800.1 // AT1G14200.1 // AT1G02610.1 // AT1G49570.1 // AT1G60190.1 // AT3G61035.1 // AT4G11290.1 // AT5G19890.1 // AT4G02075.1
Cellular process
GO:0005576	C	extracellular region	8	244	285	37767	0.00066	0.069	// AT5G07530.1 // AT5G14380.1 // AT1G75930.1 // AT2G14610.1 // AT2G43530.1 // AT5G07550.1 // AT5G07510.1 // AT5G07520.1
GO:0012505	C	endomembrane system	37	244	3416	37767	0.0014	0.074	// AT4G21400.1 // AT1G66850.1 // AT4G30170.1 // AT1G76470.1 // AT3G55240.1 // AT1G49570.1 // AT1G62510.1 // AT1G13830.1 // AT4G38700.1 // AT3G13130.1 // AT3G28750.1 // AT2G16750.1 // AT4G33355.1 // AT3G23510.1 // AT4G22050.1 // AT2G47050.1 // AT5G19580.1 // AT1G52070.1 // AT5G11610.1 // AT3G16670.1 // AT1G75050.1 // AT4G26830.1 // AT1G47980.1 // AT1G02813.1 // AT5G47000.1 // AT4G15160.1 // AT4G11…
GO:0016020	C	membrane	39	244	4068	37767	0.0083	0.25	// AT1G43800.1 // AT4G28700.1 // AT4G27970.1 // AT3G06435.1 // AT2G02020.1 // AT5G07510.1 // AT4G16260.1 // AT3G52310.1 // AT2G01918.1 // AT3G19680.1 // AT1G79780.1 // AT1G07340.1 // AT4G25750.1 // AT3G20520.1 // AT5G07520.1 // AT4G10850.1 // AT4G32510.1 // AT3G54700.1 // AT5G11610.1 // AT2G45040.1 // AT1G80660.1 // AT4G26590.1 // AT5G62850.1 // AT5G41550.1 // AT5G07550.1 // AT4G08670.1 // AT1G18…
GO:0031225	C	anchored to membrane	6	244	272	37767	0.0094	0.25	// AT2G45040.1 // AT5G14380.1 // AT3G20520.1 // AT4G08670.1 // AT1G18280.1 // AT4G31370.1
GO:0031224	C	intrinsic to membrane	11	244	806	37767	0.017	0.27	// AT2G45040.1 // AT4G27970.1 // AT1G07340.1 // AT5G14380.1 // AT5G41550.1 // AT3G20520.1 // AT4G08670.1 // AT1G18280.1 // AT4G10850.1 // AT4G32510.1 // AT4G31370.1
GO:0044464	C	cell part	115	244	15217	37767	0.018	0.27	// AT4G30170.1 // AT3G55240.1 // AT3G06435.1 // AT4G38700.1 // AT1G43800.1 // AT1G08730.1 // AT1G07340.1 // AT4G22050.1 // AT1G35140.1 // AT3G20520.1 // AT5G59370.1 // AT5G19580.1 // AT1G52070.1 // AT5G11610.1 // AT4G06746.1 // AT1G80660.1 // AT4G26590.1 // AT1G47980.1 // AT4G08670.1 // AT2G43140.1 // AT5G07230.1 // AT3G48360.1 // AT1G07985.1 // AT4G35180.1 // AT2G26450.1 // AT4G08950.1 // AT1G72…
GO:0005623	C	cell	115	244	15217	37767	0.018	0.27	// AT4G30170.1 // AT3G55240.1 // AT3G06435.1 // AT4G38700.1 // AT1G43800.1 // AT1G08730.1 // AT1G07340.1 // AT4G22050.1 // AT1G35140.1 // AT3G20520.1 // AT5G59370.1 // AT5G19580.1 // AT1G52070.1 // AT5G11610.1 // AT4G06746.1 // AT1G80660.1 // AT4G26590.1 // AT1G47980.1 // AT4G08670.1 // AT2G43140.1 // AT5G07230.1 // AT3G48360.1 // AT1G07985.1 // AT4G35180.1 // AT2G26450.1 // AT4G08950.1 // AT1G72…
GO:0030312	C	external encapsulating structure	6	244	407	37767	0.051	0.6	// AT1G35140.1 // AT2G26450.1 // AT4G08950.1 // AT5G57560.1 // AT5G22200.1 // AT4G16260.1
GO:0005618	C	cell wall	6	244	403	37767	0.049	0.6	// AT1G35140.1 // AT2G26450.1 // AT4G08950.1 // AT5G57560.1 // AT5G22200.1 // AT4G16260.1
GO:0009507	C	chloroplast	8	244	2740	37767	1	1	// AT1G07985.1 // AT4G31870.1 // AT4G19430.1 // AT5G02020.1 // AT2G18470.1 // AT2G11810.1 // AT3G25480.1 // AT2G39800.1
GO:0043234	C	protein complex	5	244	1443	37767	0.96	1	// AT1G54560.1 // AT2G01918.1 // AT2G13680.1 // AT1G60190.1 // AT1G08730.1
GO:0043231	C	intracellular membrane-bounded organelle	30	244	7615	37767	1	1	// AT3G15280.1 // AT1G69260.1 // AT1G26330.1 // AT1G15360.1 // AT2G23800.1 // AT4G17490.1 // AT2G39800.1 // AT2G43140.1 // AT5G59370.1 // AT2G18470.1 // AT1G28000.1 // AT5G63160.1 // AT2G42830.1 // AT5G53980.1 // AT3G48360.1 // AT1G71770.1 // AT4G06746.1 // AT4G31870.1 // AT4G19430.1 // AT4G14550.1 // AT3G21330.1 // AT4G24580.1 // AT3G25480.1 // AT5G19890.1 // AT1G33760.1 // AT1G07985.1 // AT5G02…
GO:0005829	C	cytosol	6	244	912	37767	0.54	1	// AT5G09500.1 // AT4G04840.1 // AT5G45820.1 // AT1G04580.1 // AT1G77120.1 // AT1G71770.1
GO:0044424	C	intracellular part	40	244	9302	37767	1	1	// AT3G15280.1 // AT1G69260.1 // AT1G26330.1 // AT1G15360.1 // AT2G23800.1 // AT4G17490.1 // AT1G54560.1 // AT2G01918.1 // AT2G39800.1 // AT2G43140.1 // AT1G08730.1 // AT5G09500.1 // AT5G59370.1 // AT1G70560.1 // AT2G18470.1 // AT1G28000.1 // AT5G45820.1 // AT5G63160.1 // AT2G42830.1 // AT1G60190.1 // AT1G77120.1 // AT3G48360.1 // AT1G71770.1 // AT4G06746.1 // AT4G31870.1 // AT4G19430.1 // AT4G14…
GO:0044422	C	organelle part	6	244	2562	37767	1	1	// AT5G09500.1 // AT2G11810.1 // AT2G01918.1 // AT3G25480.1 // AT1G08730.1 // AT1G54560.1
GO:0043229	C	intracellular organelle	34	244	8149	37767	1	1	// AT3G15280.1 // AT1G69260.1 // AT1G26330.1 // AT1G15360.1 // AT2G23800.1 // AT4G17490.1 // AT1G54560.1 // AT2G01918.1 // AT2G39800.1 // AT2G43140.1 // AT1G08730.1 // AT5G09500.1 // AT5G59370.1 // AT2G18470.1 // AT1G28000.1 // AT5G63160.1 // AT2G42830.1 // AT5G53980.1 // AT3G48360.1 // AT1G71770.1 // AT4G06746.1 // AT4G31870.1 // AT4G19430.1 // AT4G14550.1 // AT3G21330.1 // AT4G24580.1 // AT3G25…
GO:0043227	C	membrane-bounded organelle	30	244	7622	37767	1	1	// AT3G15280.1 // AT1G69260.1 // AT1G26330.1 // AT1G15360.1 // AT2G23800.1 // AT4G17490.1 // AT2G39800.1 // AT2G43140.1 // AT5G59370.1 // AT2G18470.1 // AT1G28000.1 // AT5G63160.1 // AT2G42830.1 // AT5G53980.1 // AT3G48360.1 // AT1G71770.1 // AT4G06746.1 // AT4G31870.1 // AT4G19430.1 // AT4G14550.1 // AT3G21330.1 // AT4G24580.1 // AT3G25480.1 // AT5G19890.1 // AT1G33760.1 // AT1G07985.1 // AT5G02…
GO:0044425	C	membrane part	13	244	1360	37767	0.11	1	// AT2G45040.1 // AT4G27970.1 // AT1G07340.1 // AT4G32510.1 // AT5G41550.1 // AT3G20520.1 // AT4G08670.1 // AT1G18280.1 // AT5G14380.1 // AT2G13680.1 // AT4G10850.1 // AT2G01918.1 // AT4G31370.1
GO:0044444	C	cytoplasmic part	19	244	6289	37767	1	1	// AT1G07985.1 // AT2G39800.1 // AT5G09500.1 // AT4G31870.1 // AT4G19430.1 // AT4G04840.1 // AT2G18470.1 // AT2G11810.1 // AT5G45820.1 // AT1G04580.1 // AT5G59370.1 // AT3G15280.1 // AT1G28000.1 // AT5G02020.1 // AT1G77120.1 // AT3G25480.1 // AT1G71770.1 // AT2G23800.1 // AT4G24580.1
GO:0032991	C	macromolecular complex	6	244	2180	37767	1	1	// AT5G09500.1 // AT2G13680.1 // AT1G60190.1 // AT2G01918.1 // AT1G08730.1 // AT1G54560.1
GO:0005622	C	intracellular	40	244	9671	37767	1	1	// AT3G15280.1 // AT1G69260.1 // AT1G26330.1 // AT1G15360.1 // AT2G23800.1 // AT4G17490.1 // AT1G54560.1 // AT2G01918.1 // AT2G39800.1 // AT2G43140.1 // AT1G08730.1 // AT5G09500.1 // AT5G59370.1 // AT1G70560.1 // AT2G18470.1 // AT1G28000.1 // AT5G45820.1 // AT5G63160.1 // AT2G42830.1 // AT1G60190.1 // AT1G77120.1 // AT3G48360.1 // AT1G71770.1 // AT4G06746.1 // AT4G31870.1 // AT4G19430.1 // AT4G14…
GO:0005634	C	nucleus	17	244	2621	37767	0.53	1	// AT1G69260.1 // AT1G26330.1 // AT5G63160.1 // AT5G19890.1 // AT1G15360.1 // AT4G14550.1 // AT3G21330.1 // AT2G42830.1 // AT4G17490.1 // AT4G29340.1 // AT3G48360.1 // AT5G53980.1 // AT2G43140.1 // AT1G71770.1 // AT1G65790.1 // AT1G33760.1 // AT4G06746.1
GO:0044446	C	intracellular organelle part	6	244	2561	37767	1	1	// AT5G09500.1 // AT2G11810.1 // AT2G01918.1 // AT3G25480.1 // AT1G08730.1 // AT1G54560.1
GO:0009536	C	plastid	8	244	2965	37767	1	1	// AT1G07985.1 // AT4G31870.1 // AT4G19430.1 // AT5G02020.1 // AT2G18470.1 // AT2G11810.1 // AT3G25480.1 // AT2G39800.1
GO:0005886	C	plasma membrane	11	244	1456	37767	0.34	1	// AT4G27970.1 // AT3G19680.1 // AT1G80660.1 // AT1G07340.1 // AT1G21270.1 // AT4G16260.1 // AT2G13680.1 // AT3G52310.1 // AT1G60740.1 // AT3G54700.1 // AT4G28700.1
GO:0005737	C	cytoplasm	24	244	6822	37767	1	1	// AT3G15280.1 // AT1G28000.1 // AT2G23800.1 // AT2G39800.1 // AT5G63160.1 // AT5G09500.1 // AT5G59370.1 // AT2G18470.1 // AT5G45820.1 // AT1G70560.1 // AT1G77120.1 // AT3G48360.1 // AT1G71770.1 // AT4G31870.1 // AT4G19430.1 // AT4G24580.1 // AT1G04580.1 // AT3G25480.1 // AT5G19890.1 // AT1G07985.1 // AT5G02020.1 // AT2G11810.1 // AT4G04840.1 // AT4G29340.1
GO:0043226	C	organelle	34	244	8155	37767	1	1	// AT3G15280.1 // AT1G69260.1 // AT1G26330.1 // AT1G15360.1 // AT2G23800.1 // AT4G17490.1 // AT1G54560.1 // AT2G01918.1 // AT2G39800.1 // AT2G43140.1 // AT1G08730.1 // AT5G09500.1 // AT5G59370.1 // AT2G18470.1 // AT1G28000.1 // AT5G63160.1 // AT2G42830.1 // AT5G53980.1 // AT3G48360.1 // AT1G71770.1 // AT4G06746.1 // AT4G31870.1 // AT4G19430.1 // AT4G14550.1 // AT3G21330.1 // AT4G24580.1 // AT3G25…
